# Supplementary material for: Palladium-catalyzed Tsuji–Trost-type reaction of benzofuran-2-ylmethyl acetates with nucleophiles
Source: Royal Society of Chemistry journal article supplement (doi:10.1039/d0ra09601f), 2021-01-01

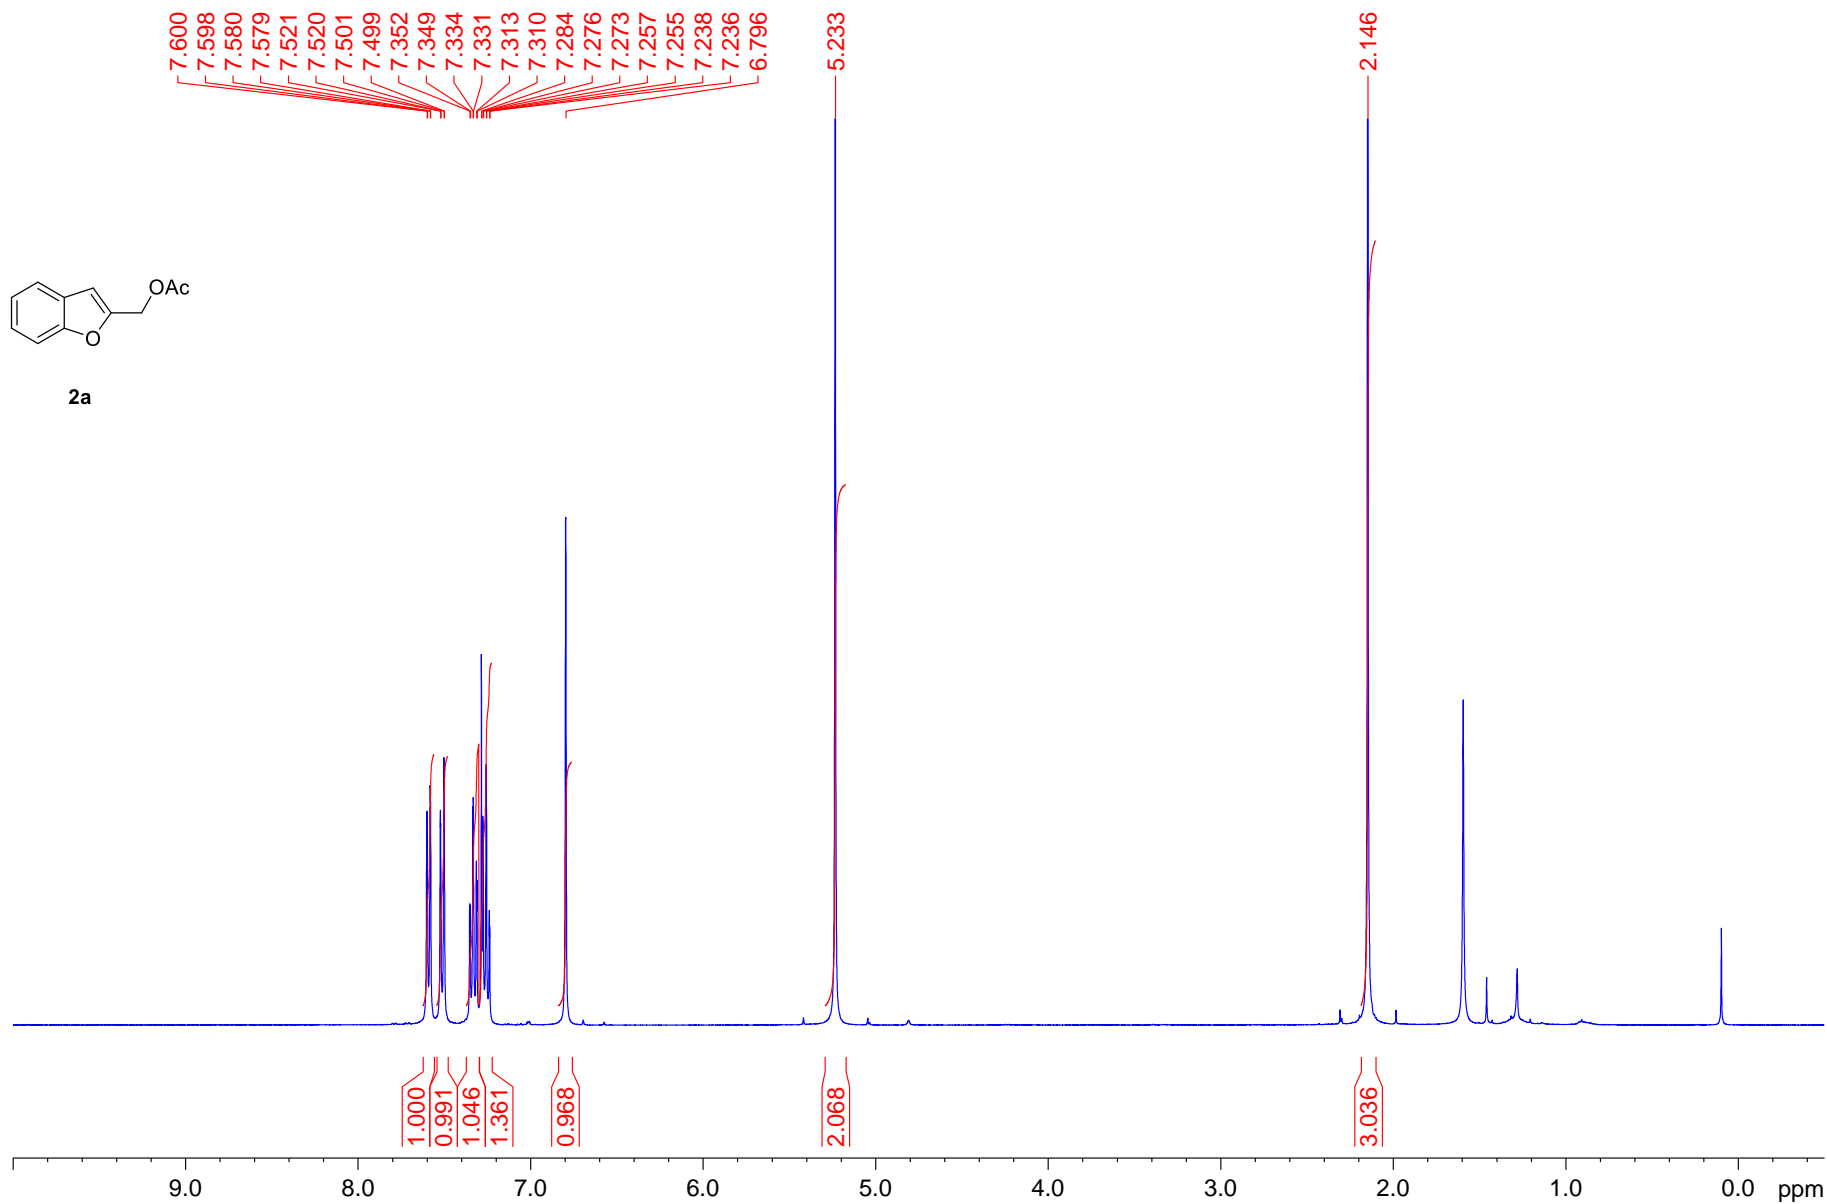

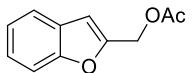

2a

170.546  
155.234  
151.866  
127.885  
124.861  
122.964  
121.345  
111.412  
107.006  
58.589  
20.856

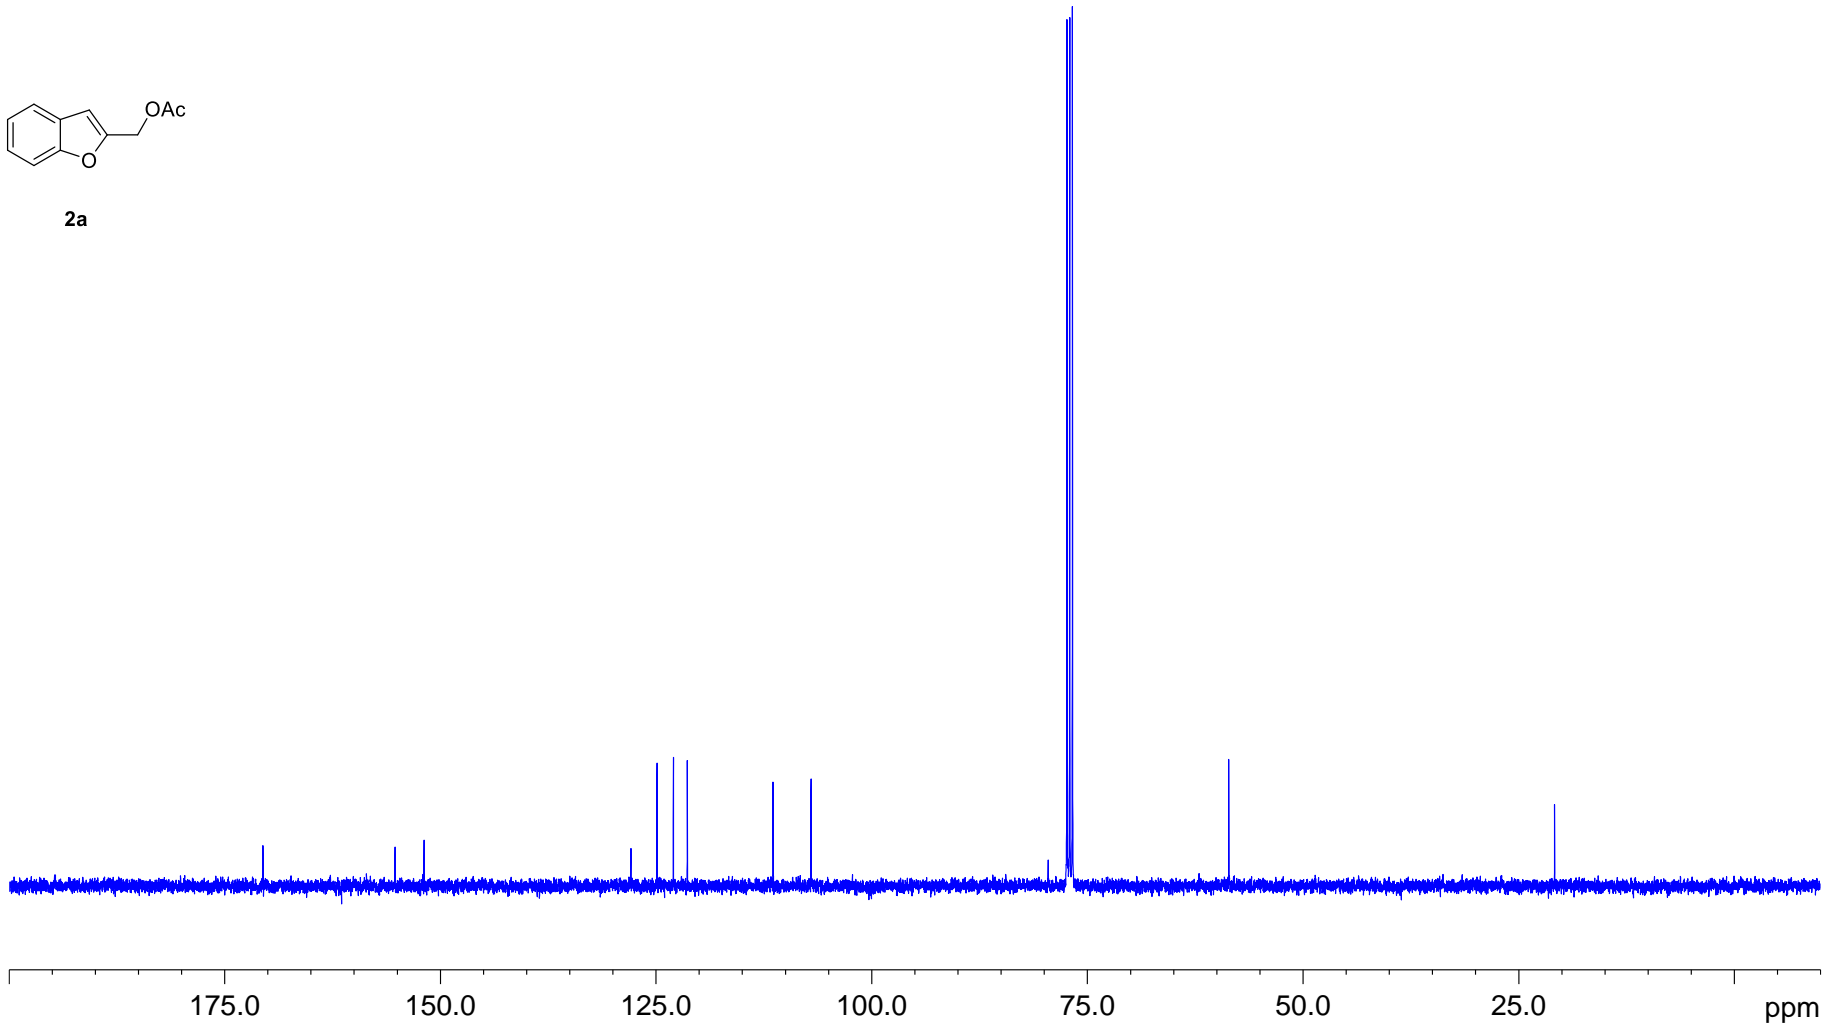



2a

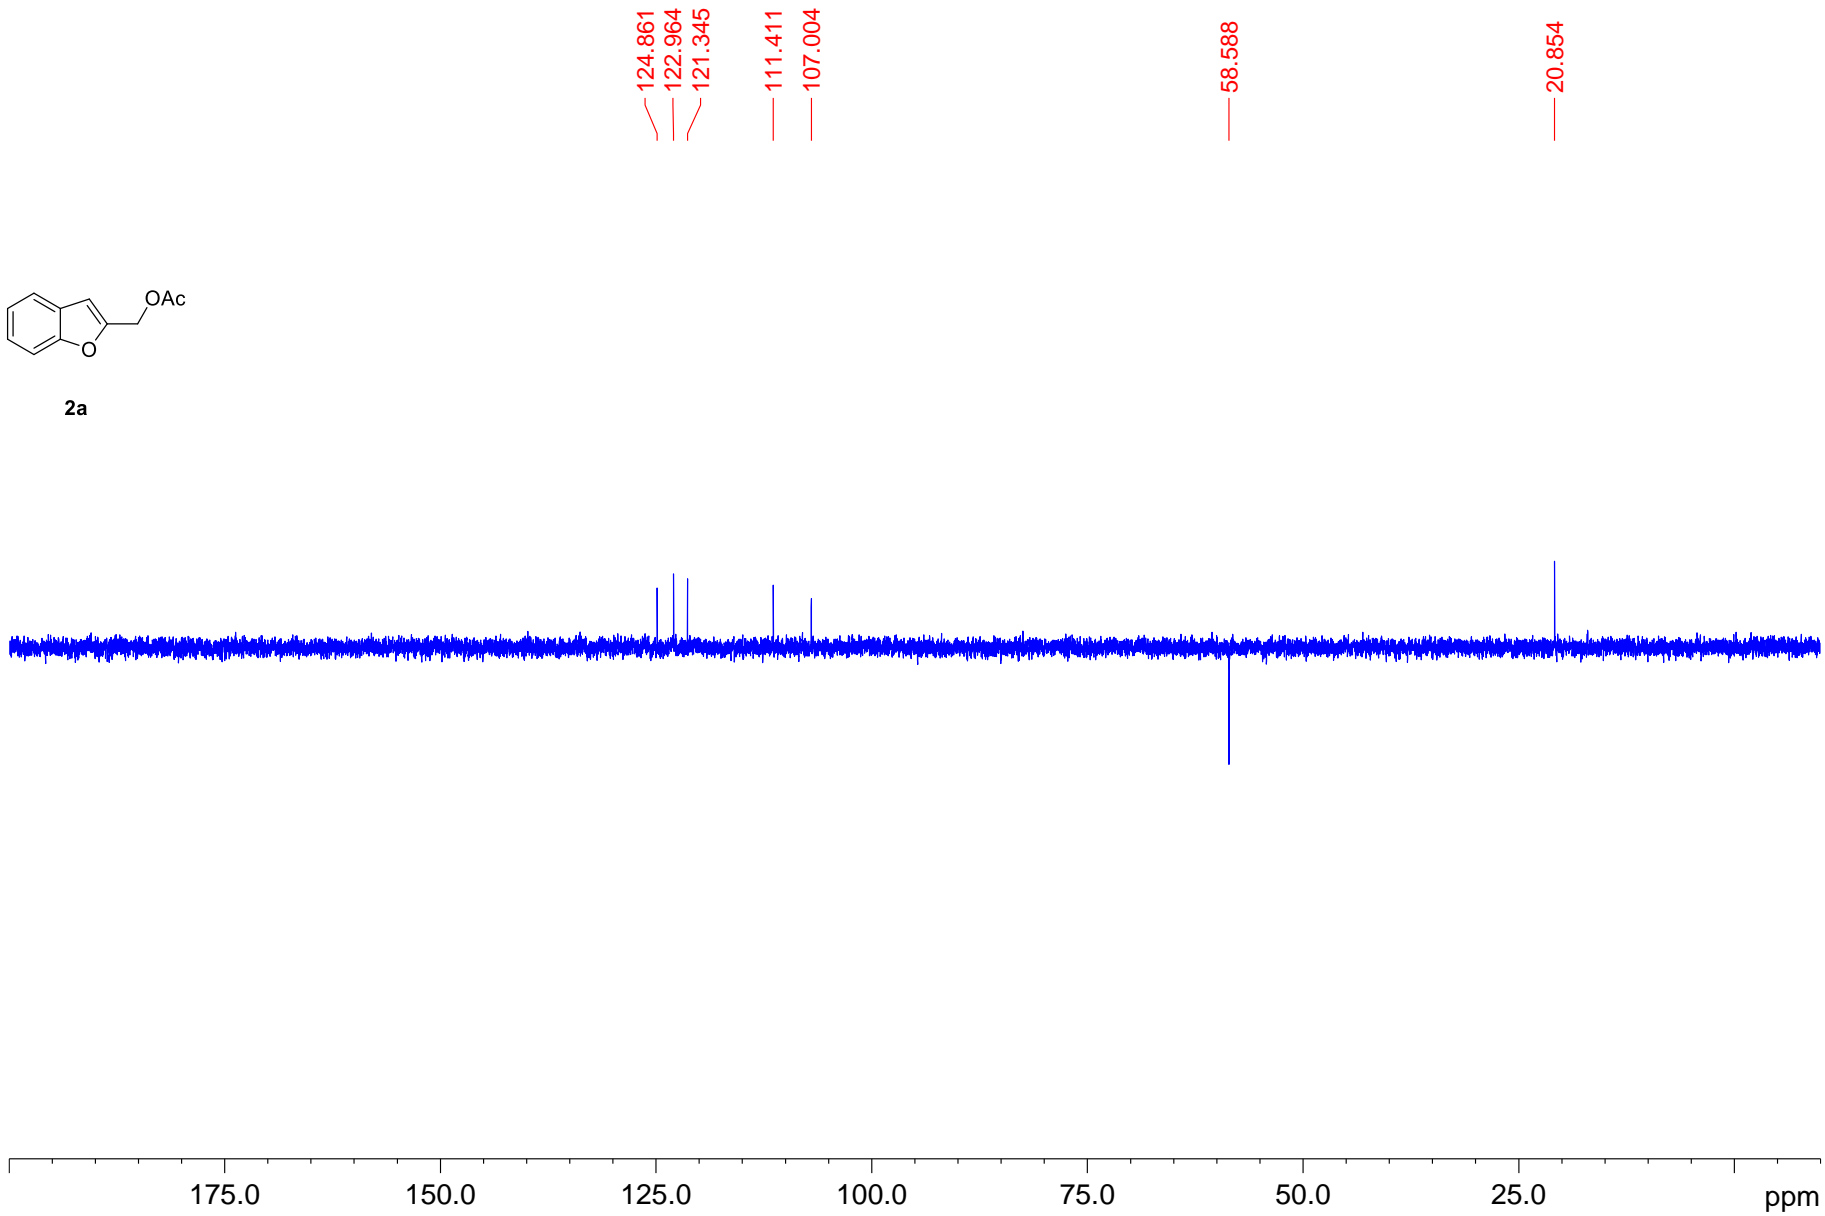

8.508  
8.502  
8.257  
8.251  
8.234  
8.228  
7.577  
7.555  
7.260  
6.911  
6.910

5.235

2.143

1.000

1.049

1.060

1.032

2.193

3.247

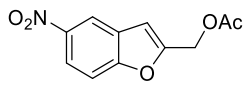

2b

9.0 8.0 7.0 6.0 5.0 4.0 3.0 2.0 1.0 0.0 ppm

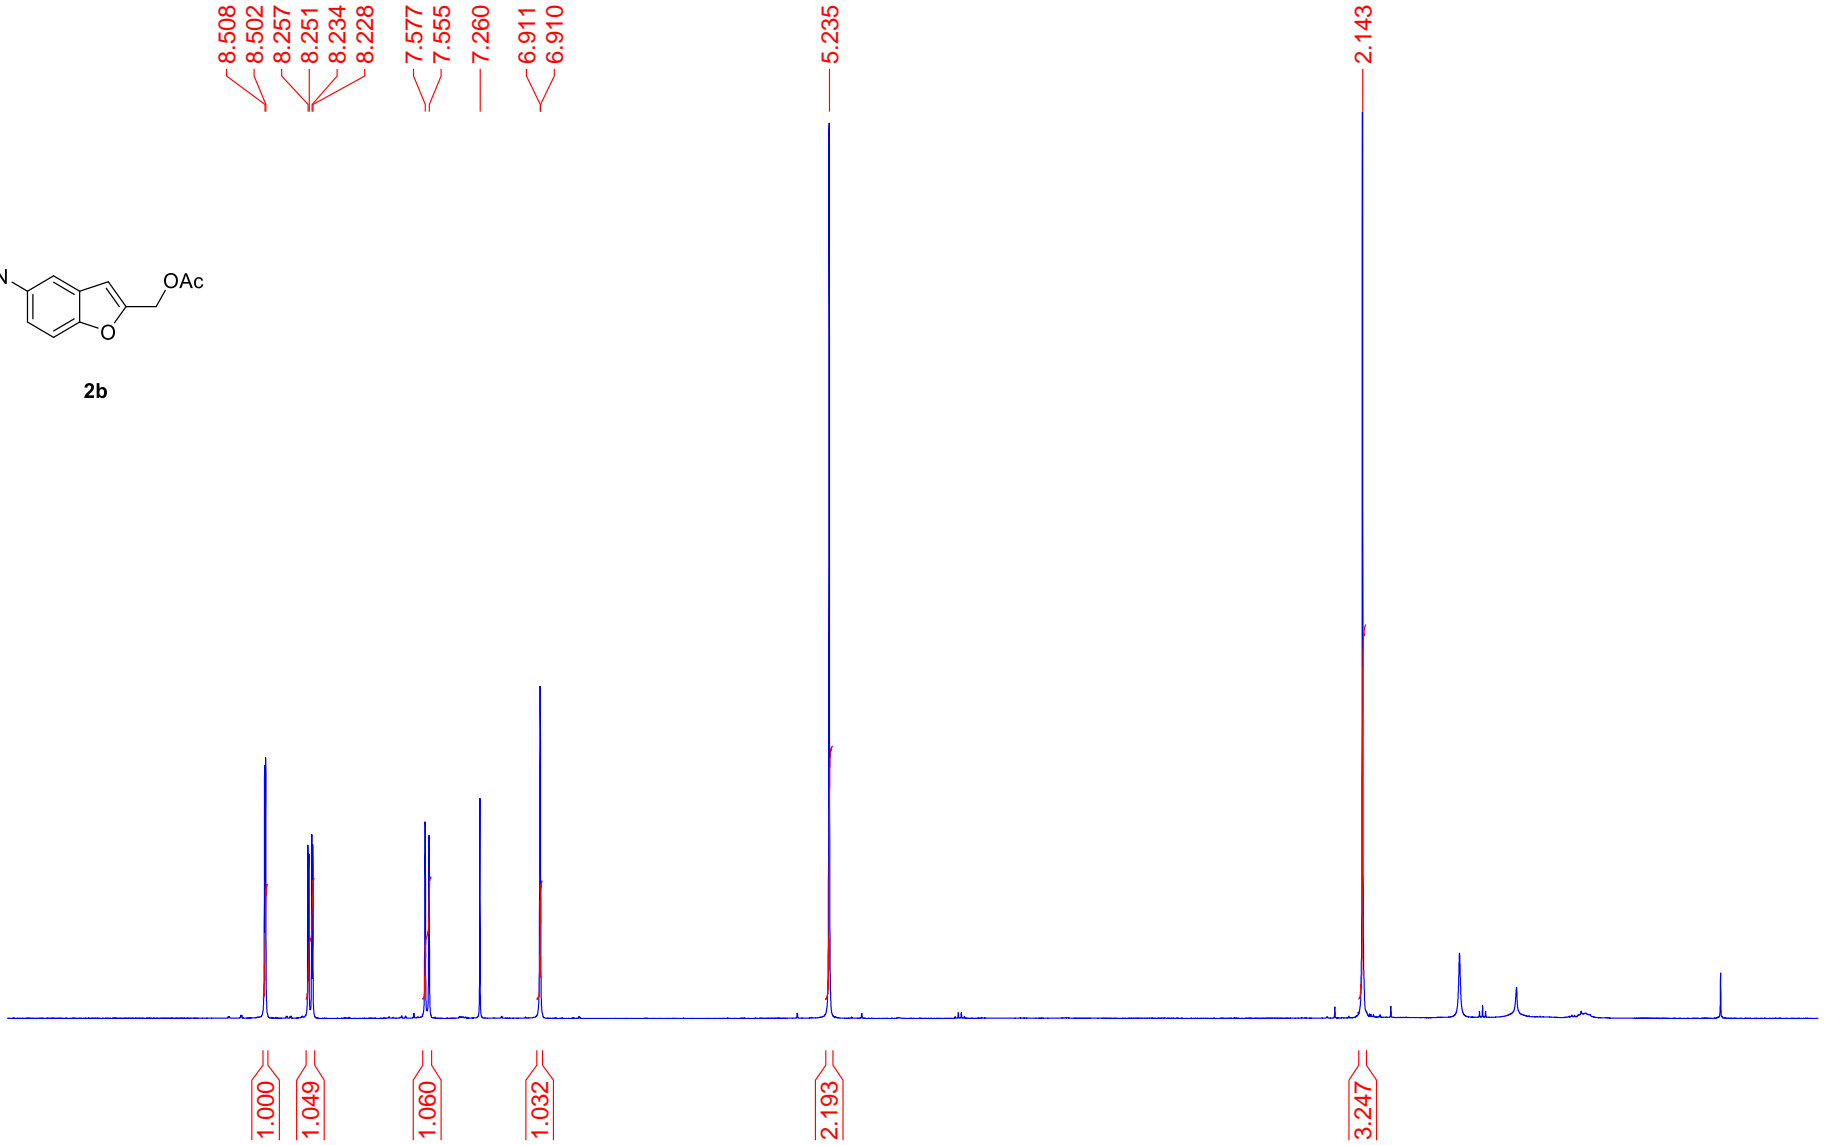

170.322  
157.871  
155.498  
144.316  
128.297  
120.712  
117.910  
111.824  
107.436  
58.072  
20.740

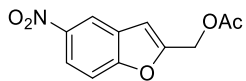

2b

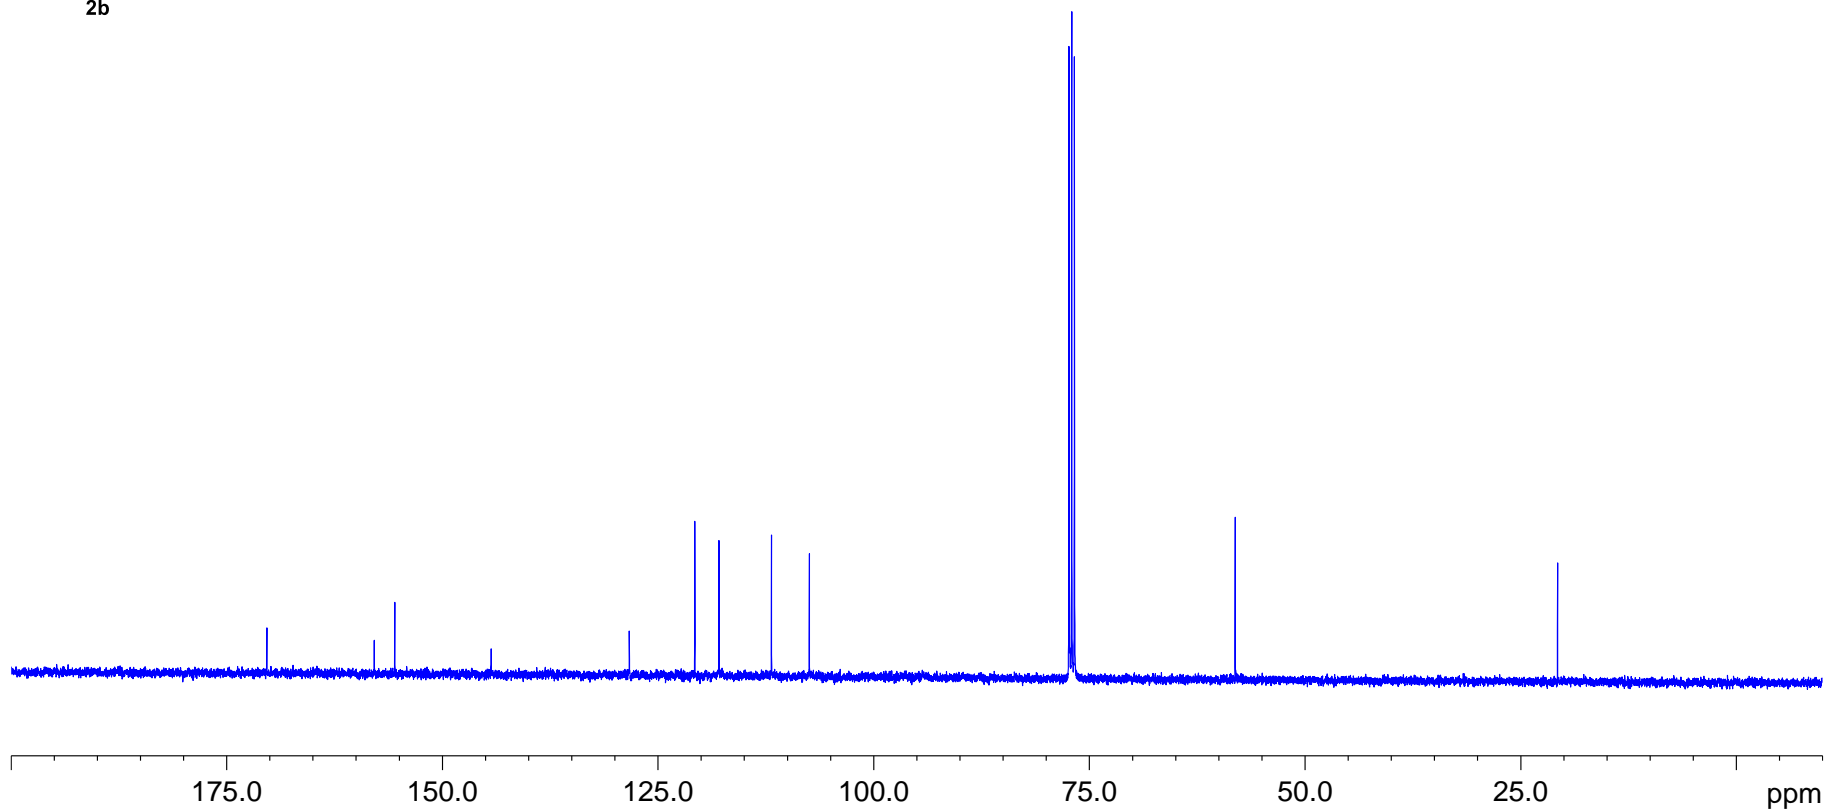

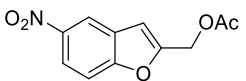

**2b**

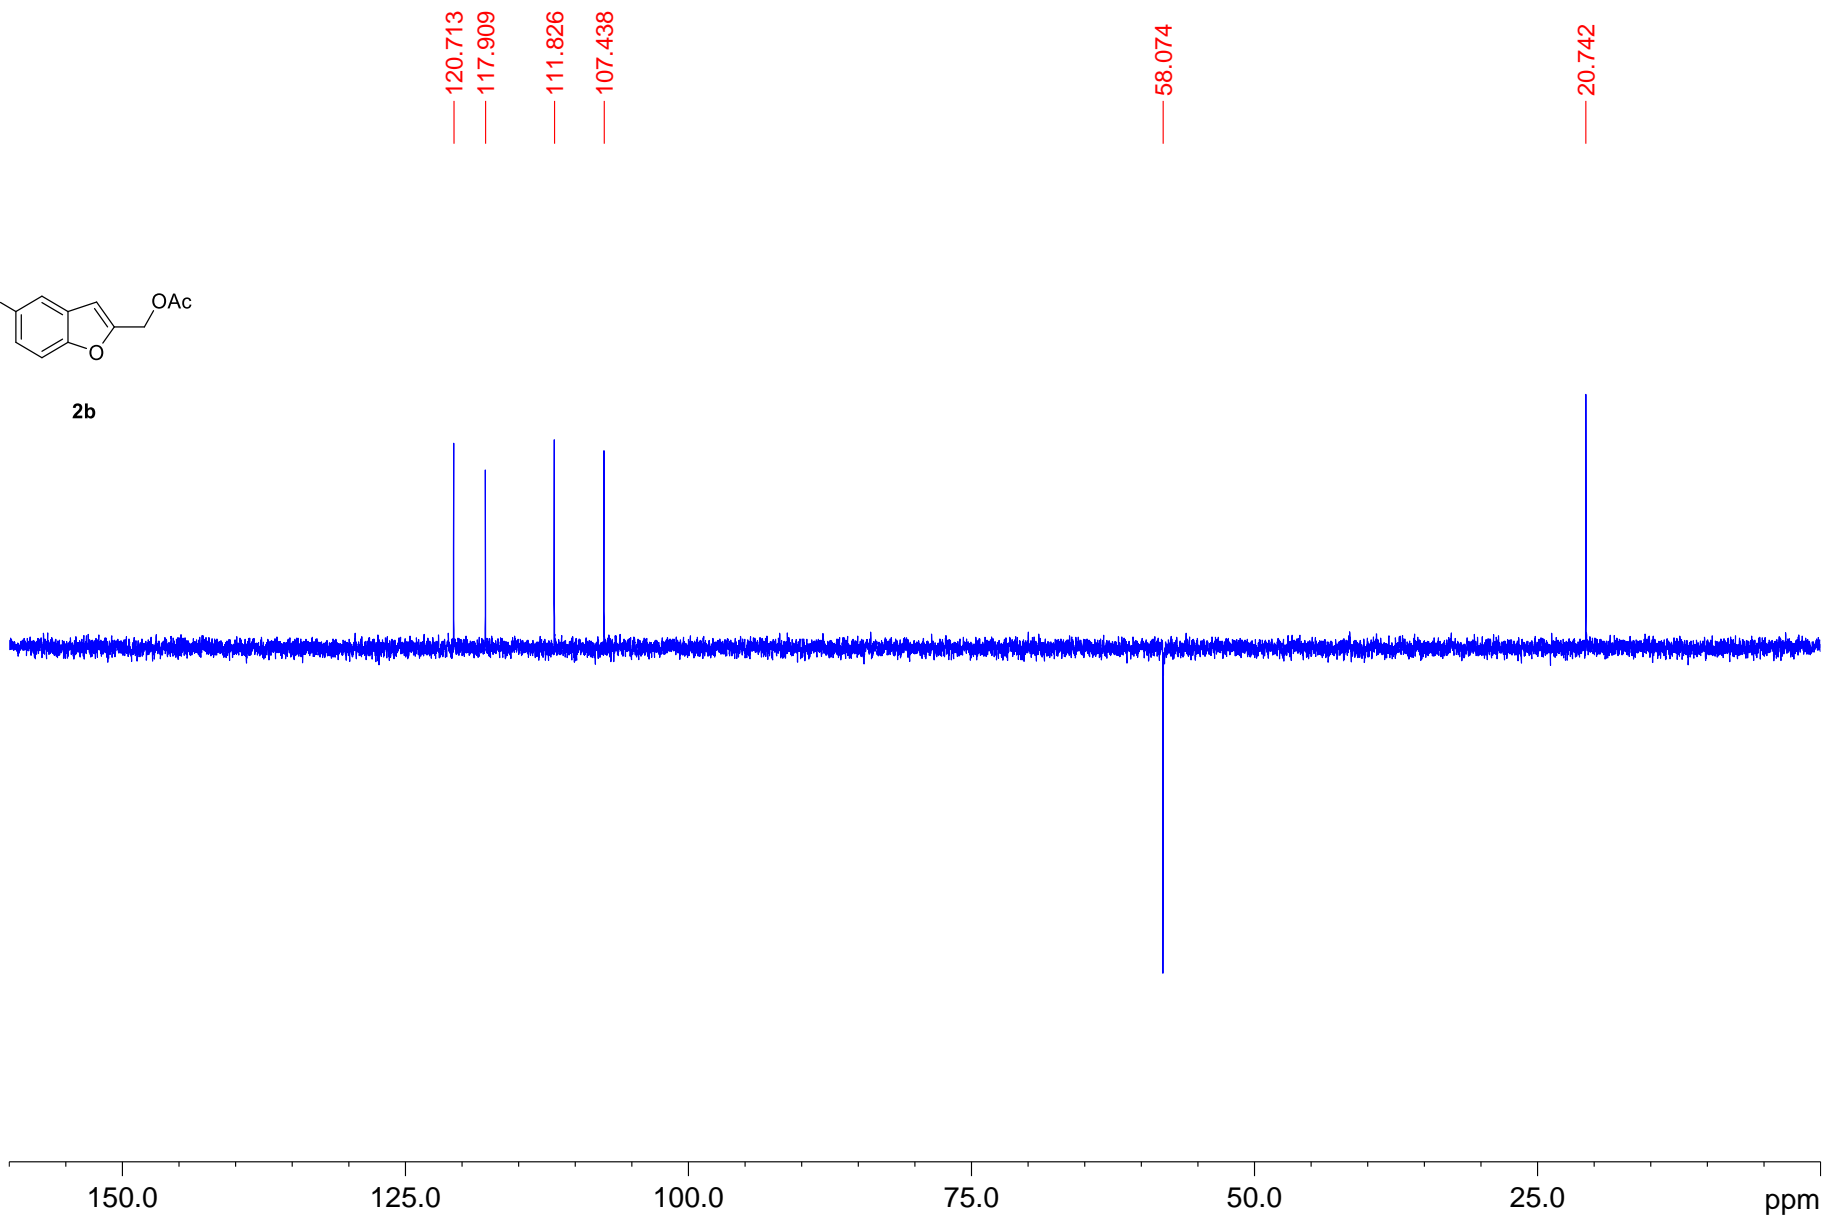

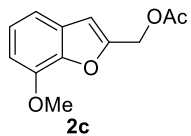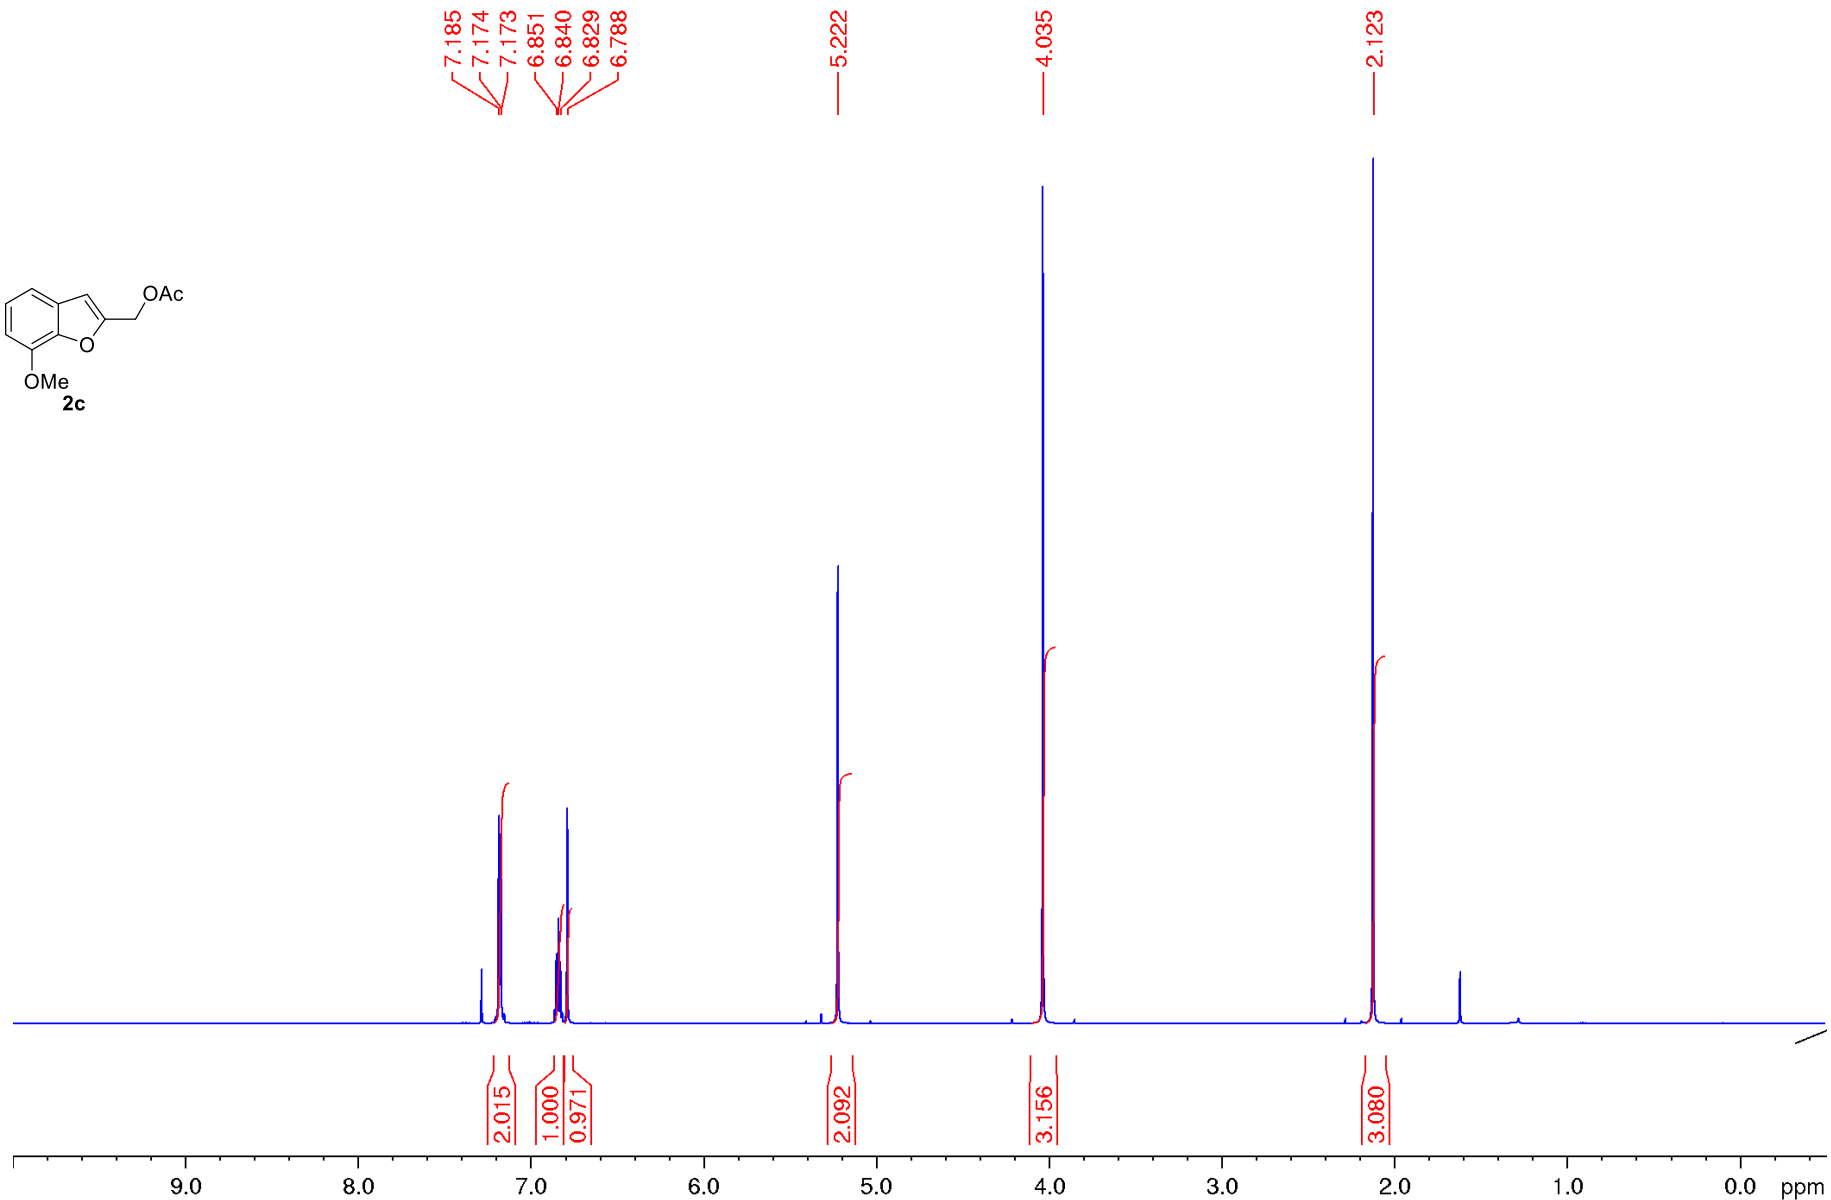

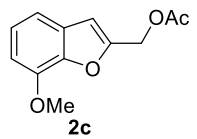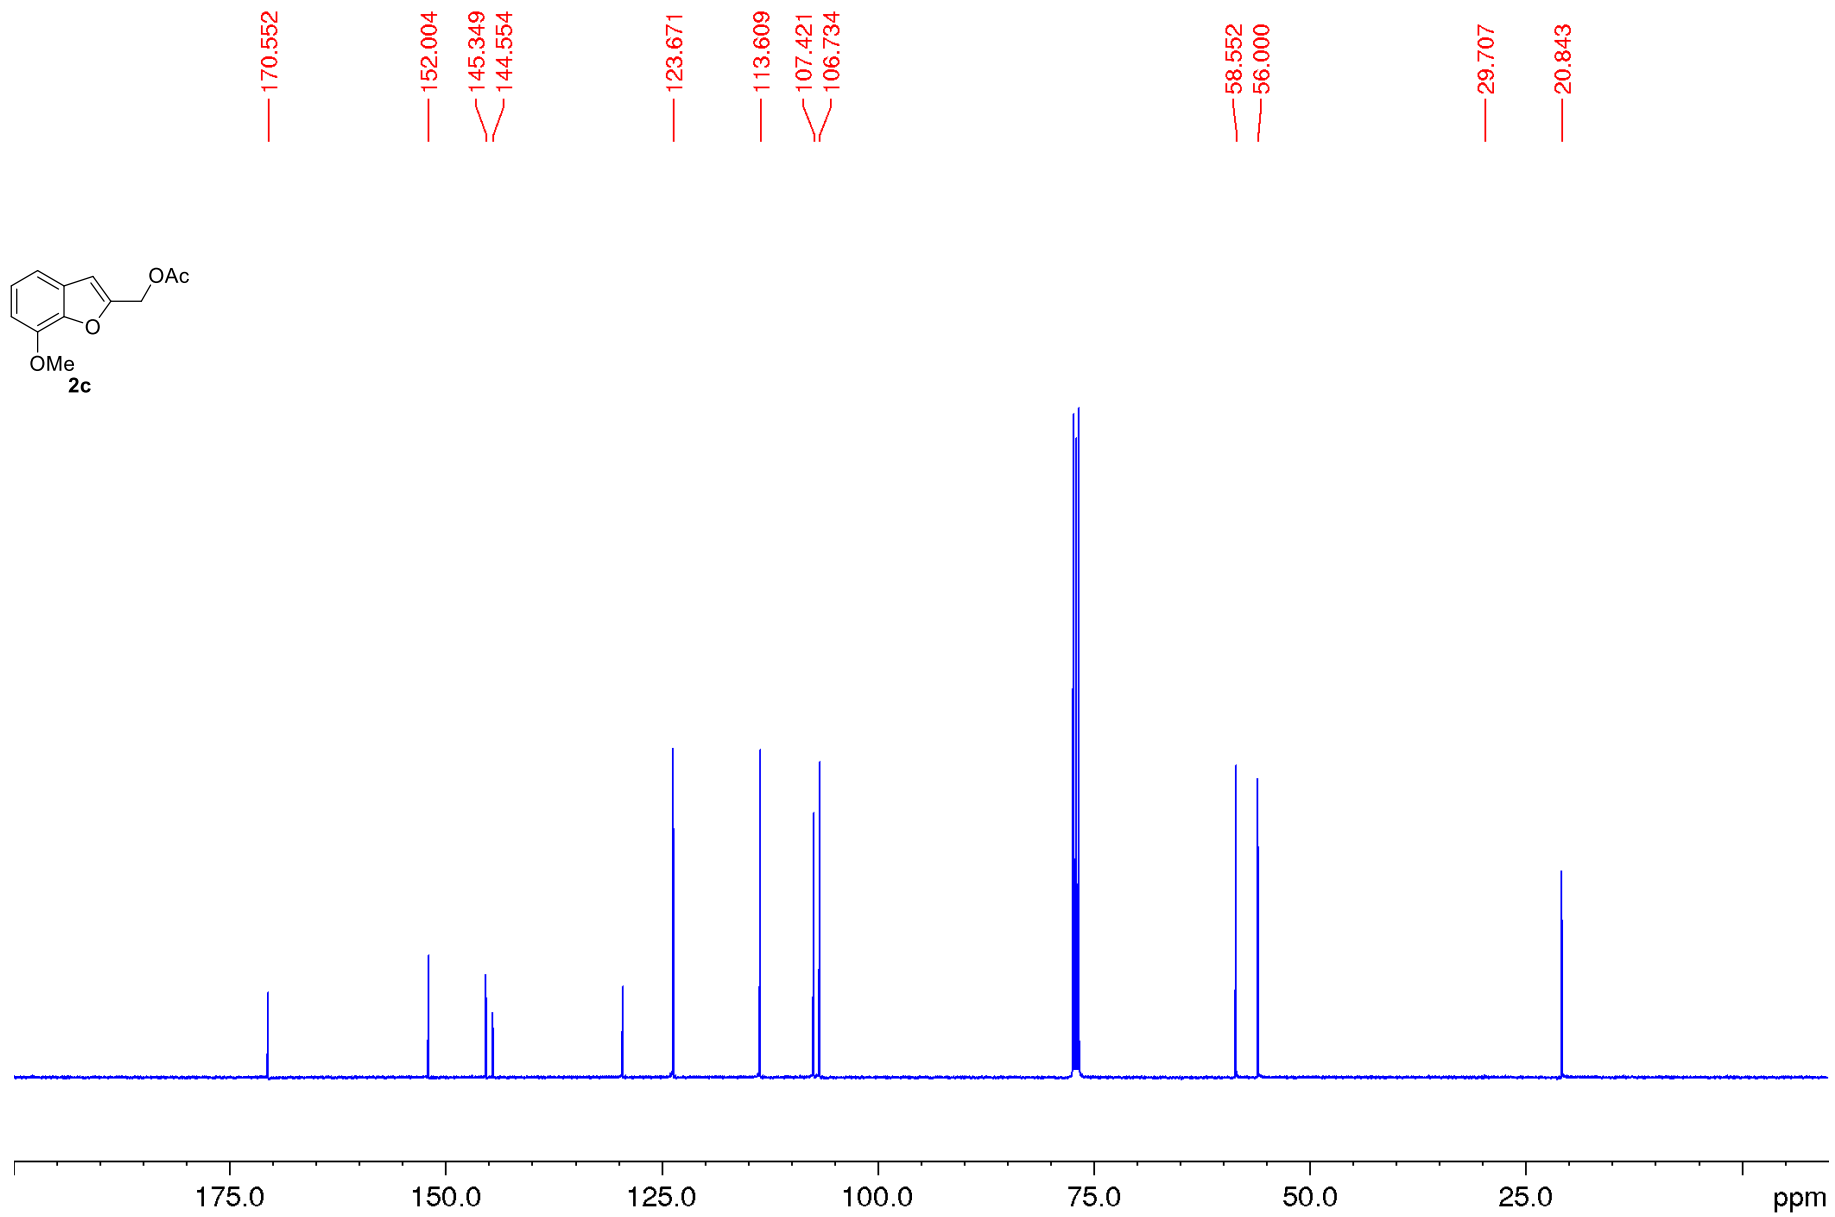



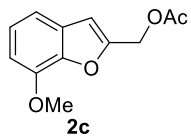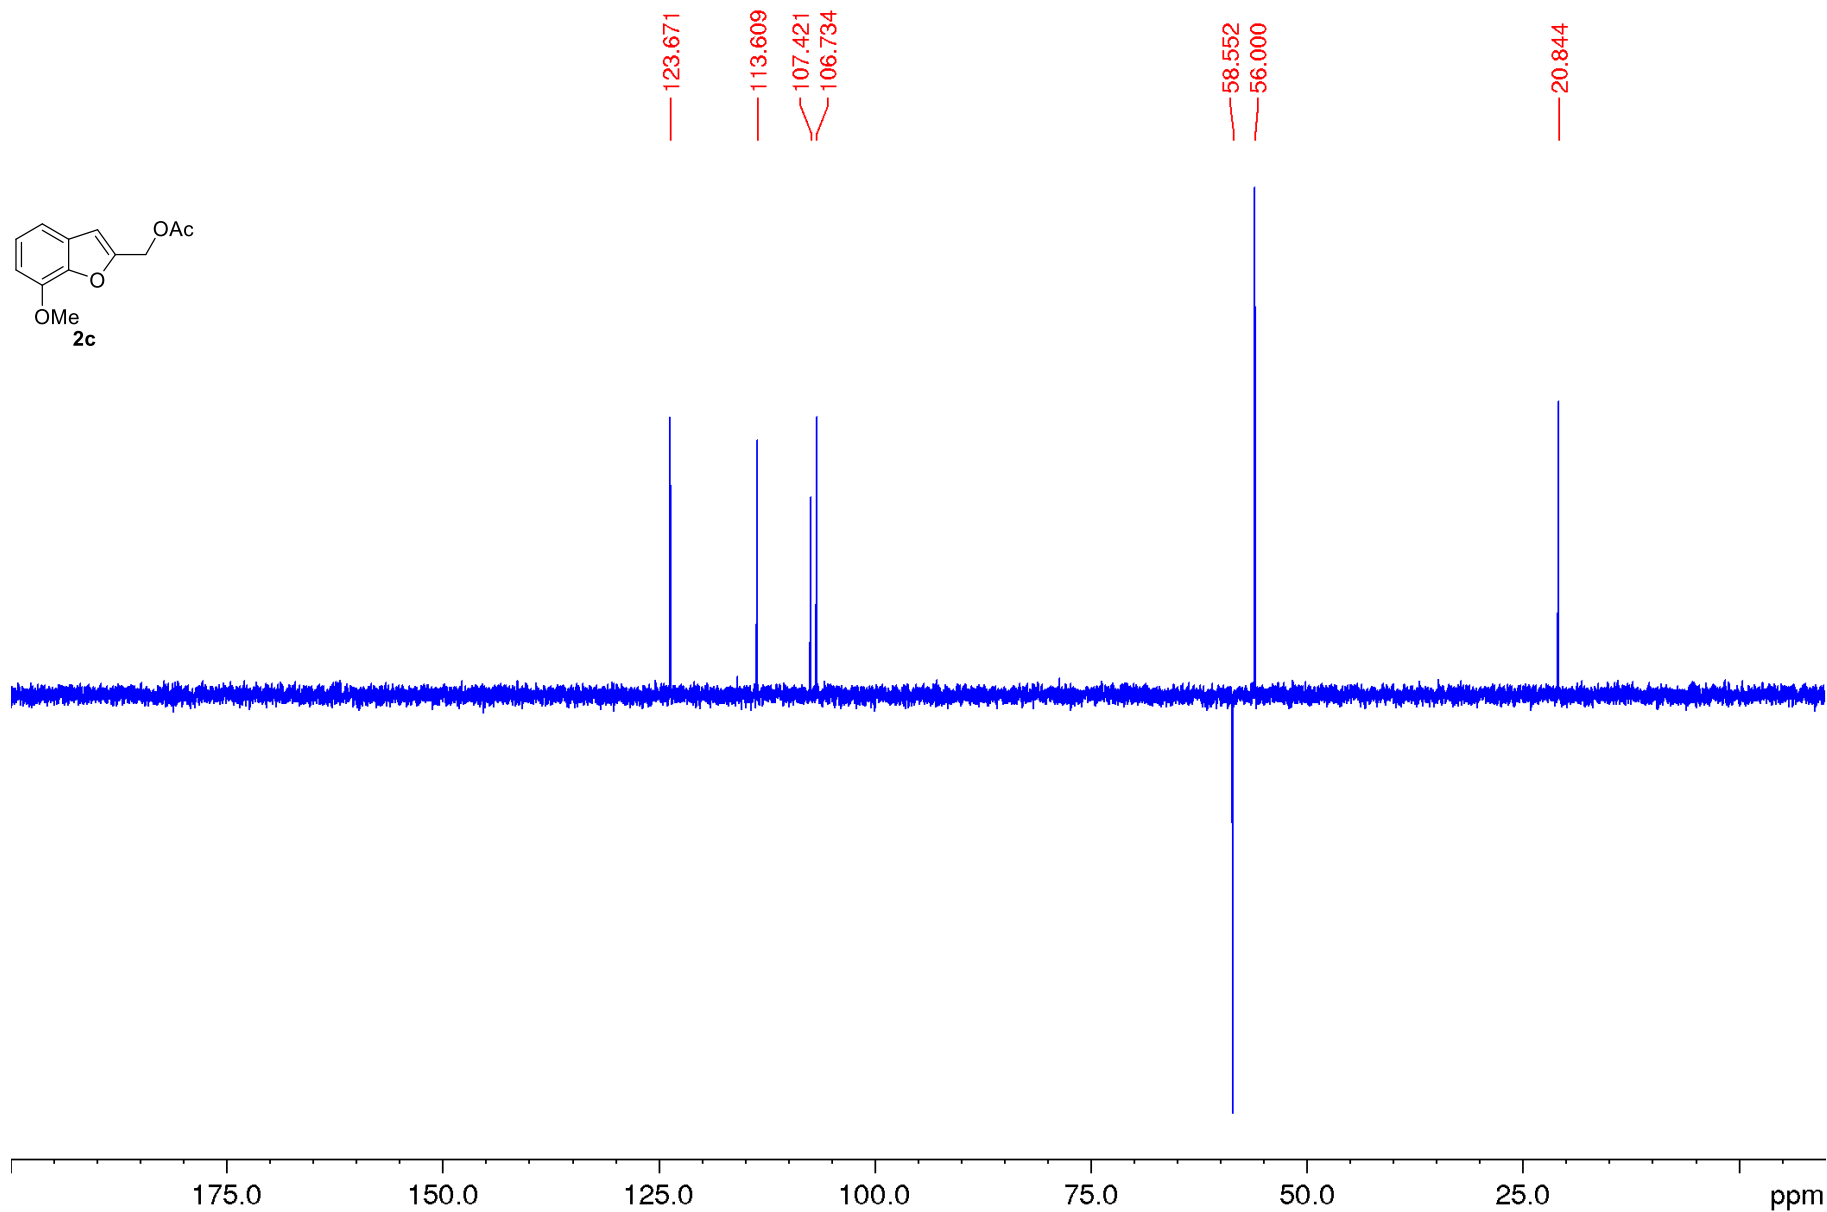

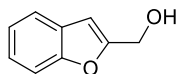

4a

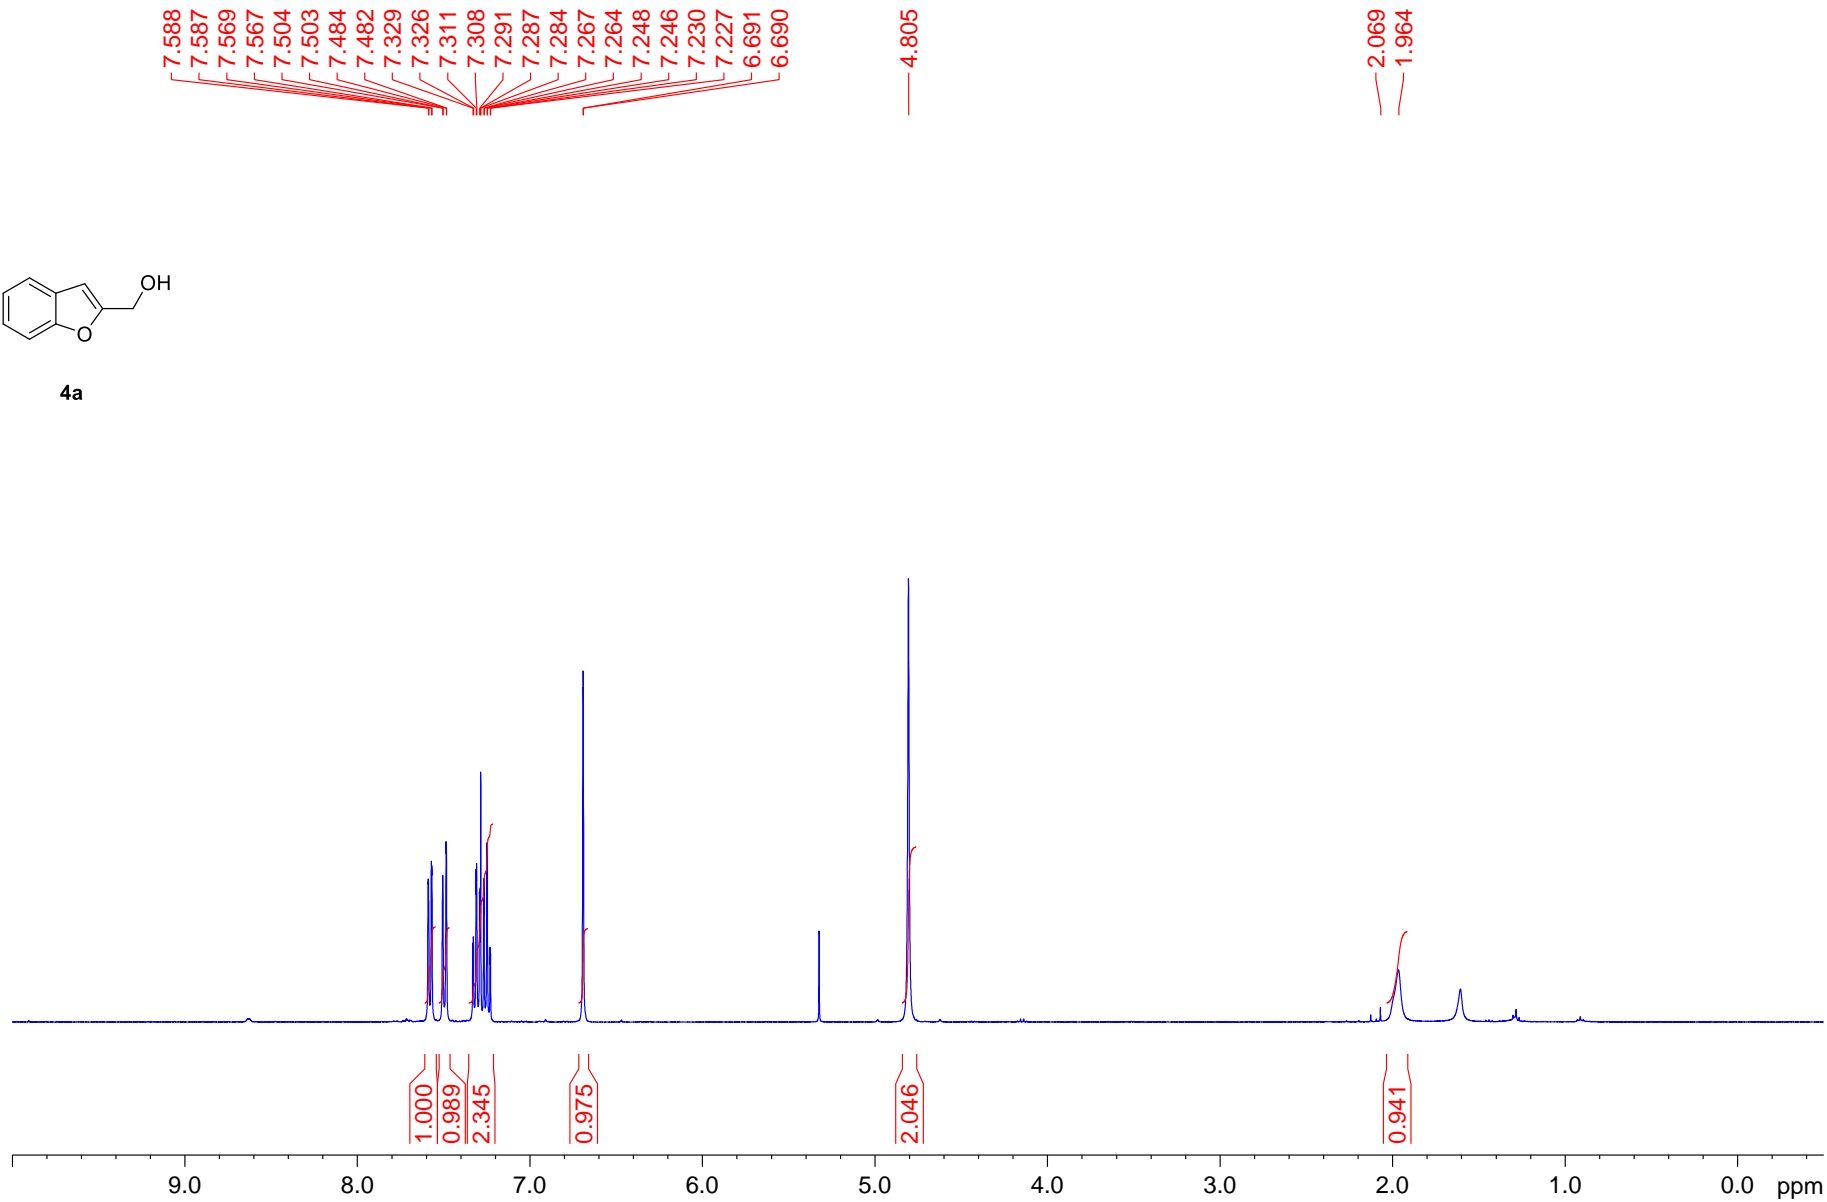

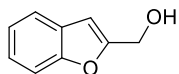

4a

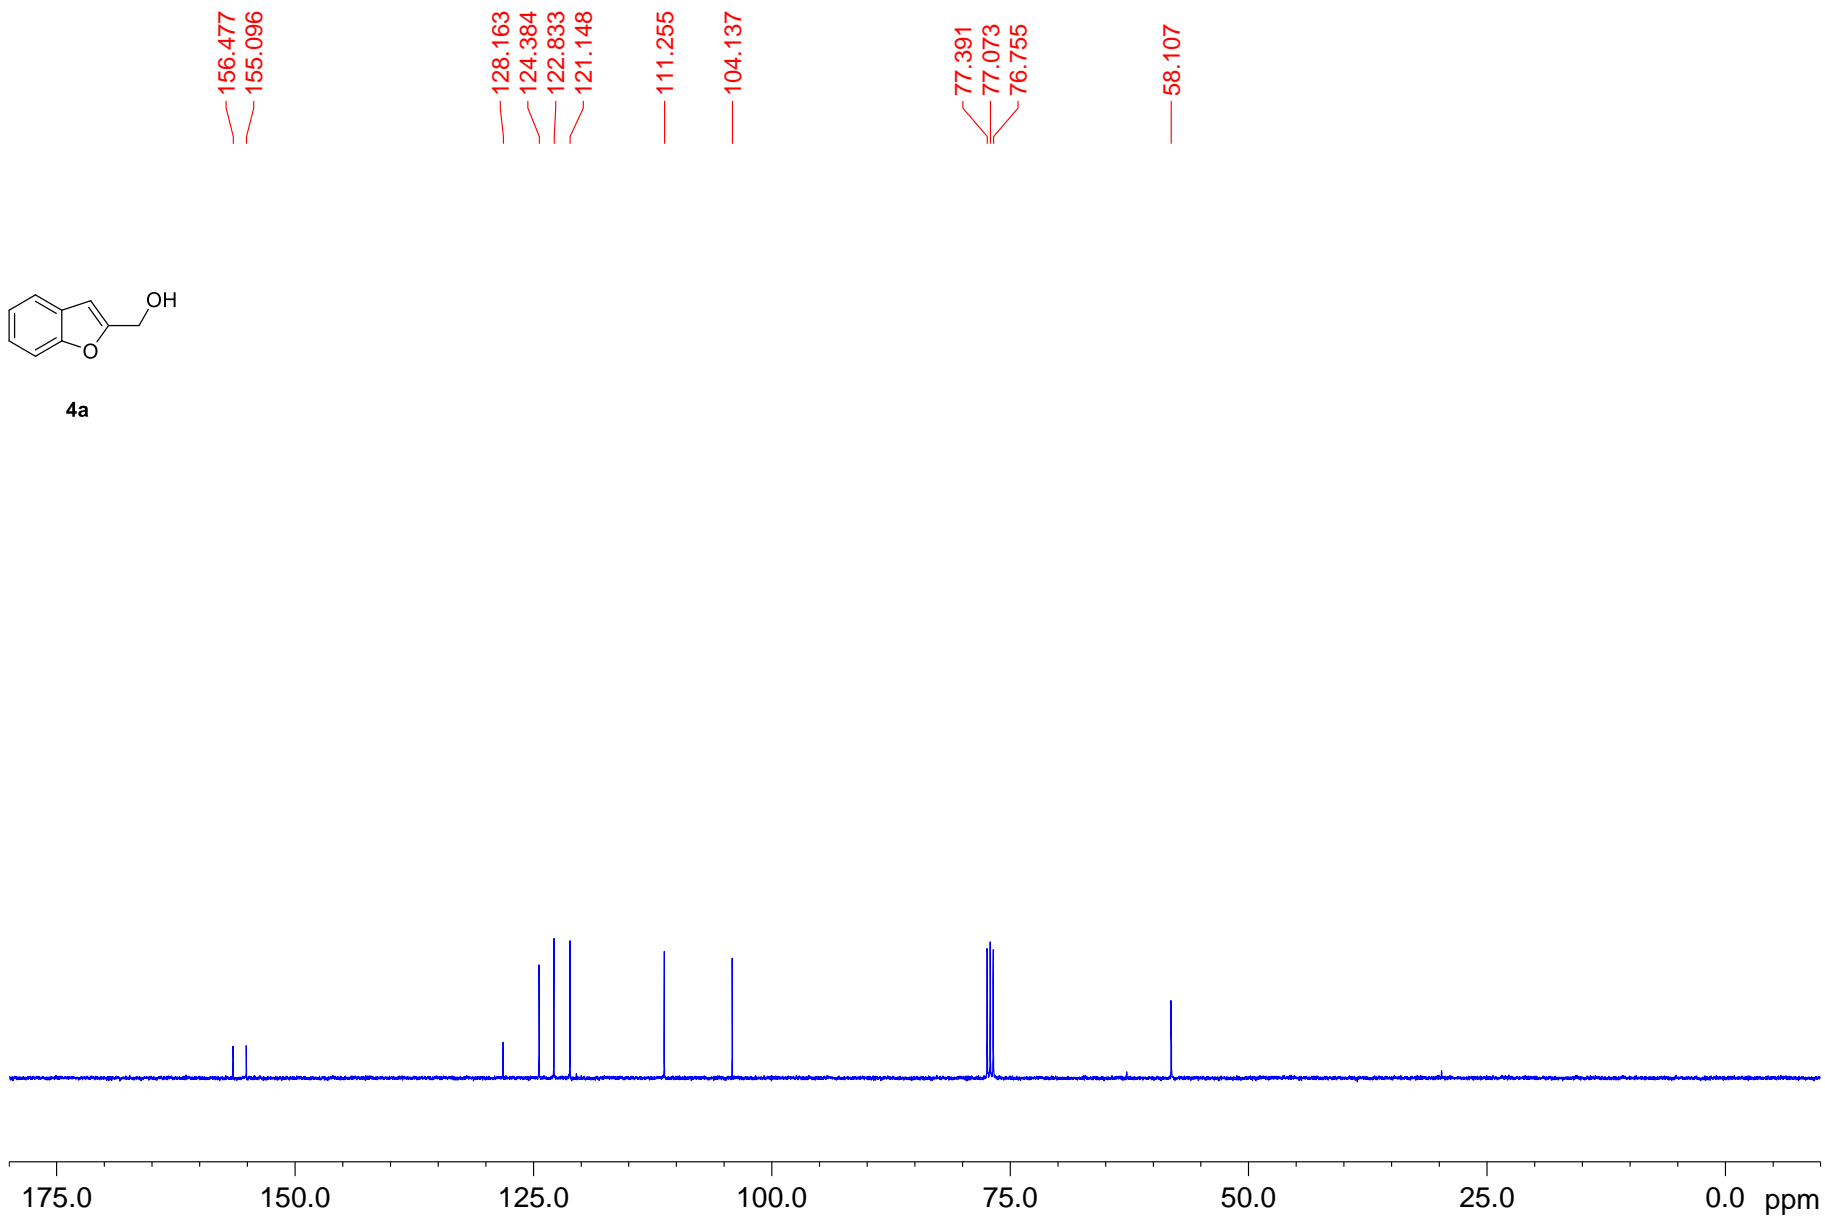

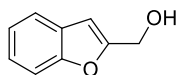

4a

124.383  
122.833  
121.149  
111.257  
104.137  
58.104

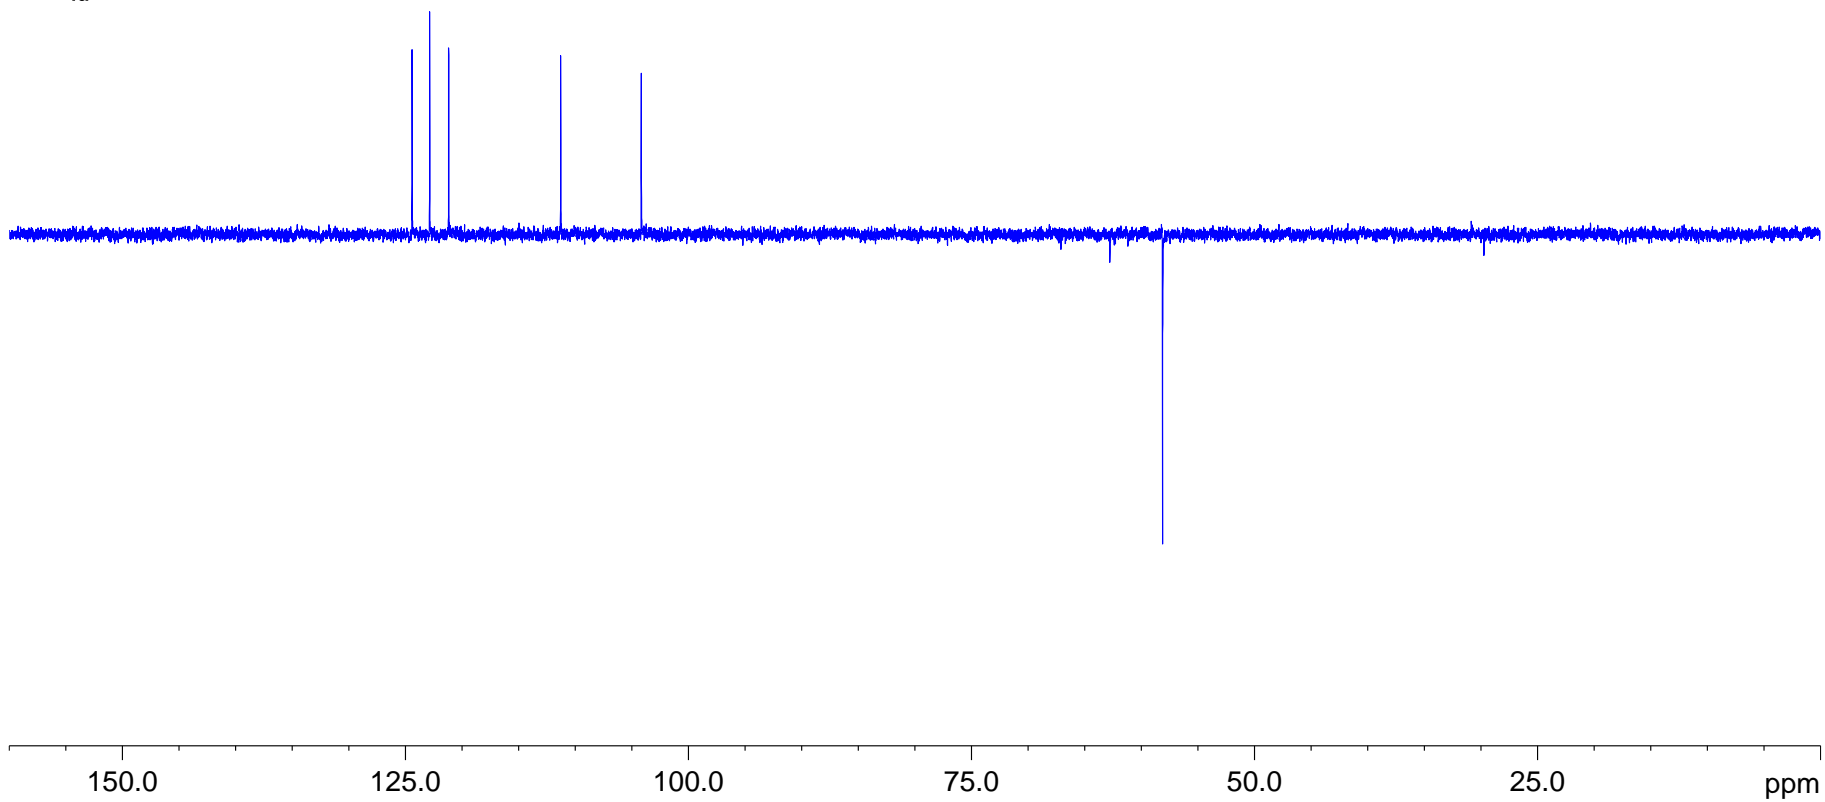

8.483  
8.477  
8.226  
8.220  
8.203  
8.197  
7.547  
7.524  
7.260  
6.817  
6.815

4.829

2.092

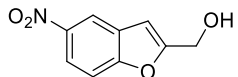

4b

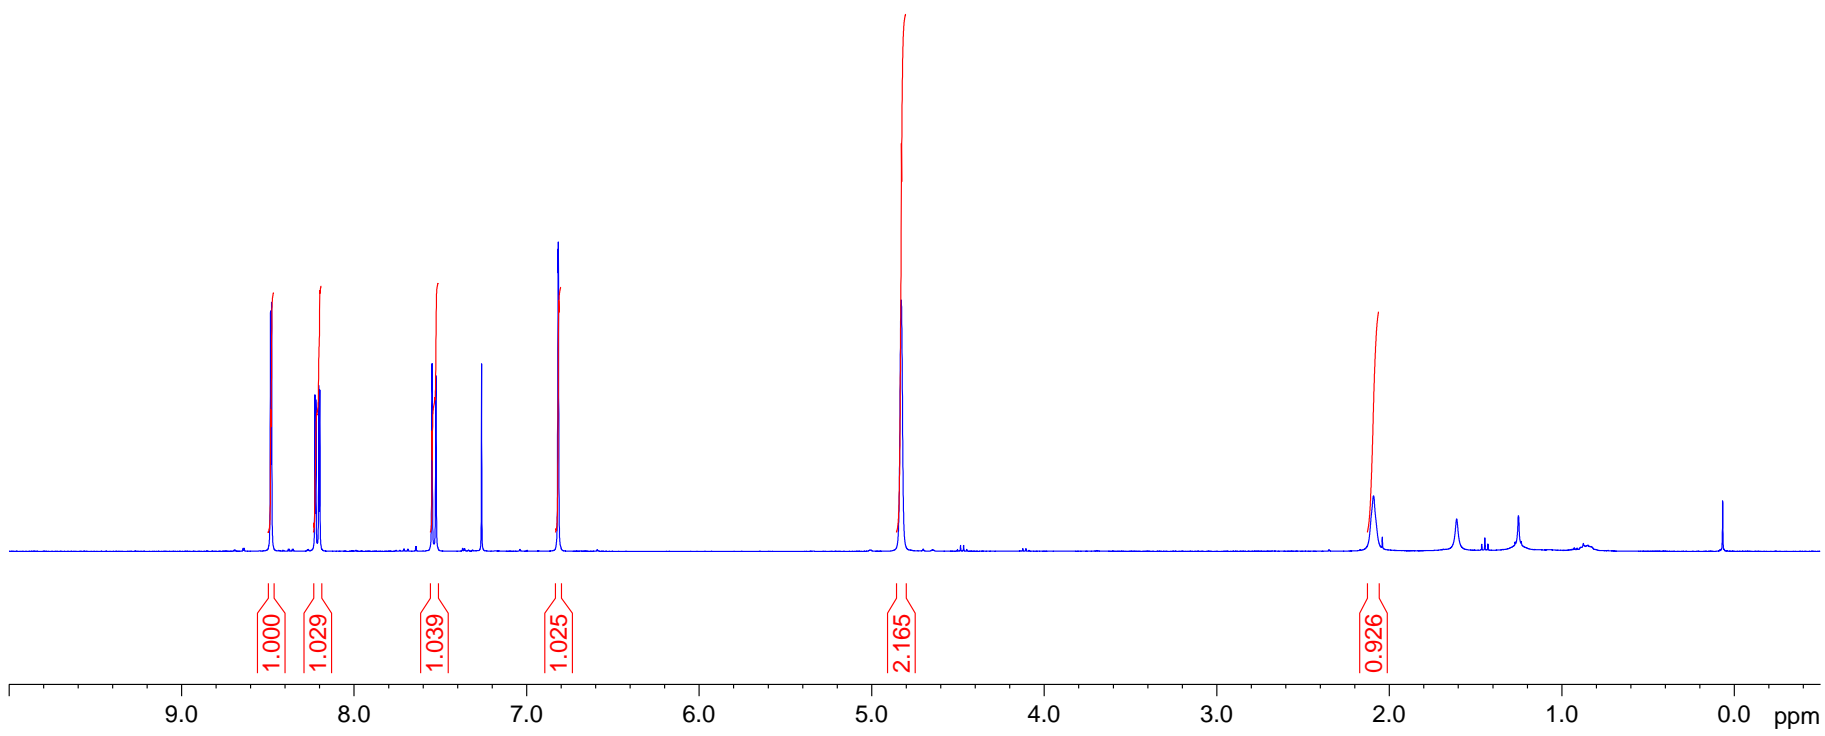

160.029  
157.853

144.207

128.586

120.296

117.656

111.597

104.701

77.357  
77.040  
76.722

57.940

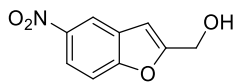

4b

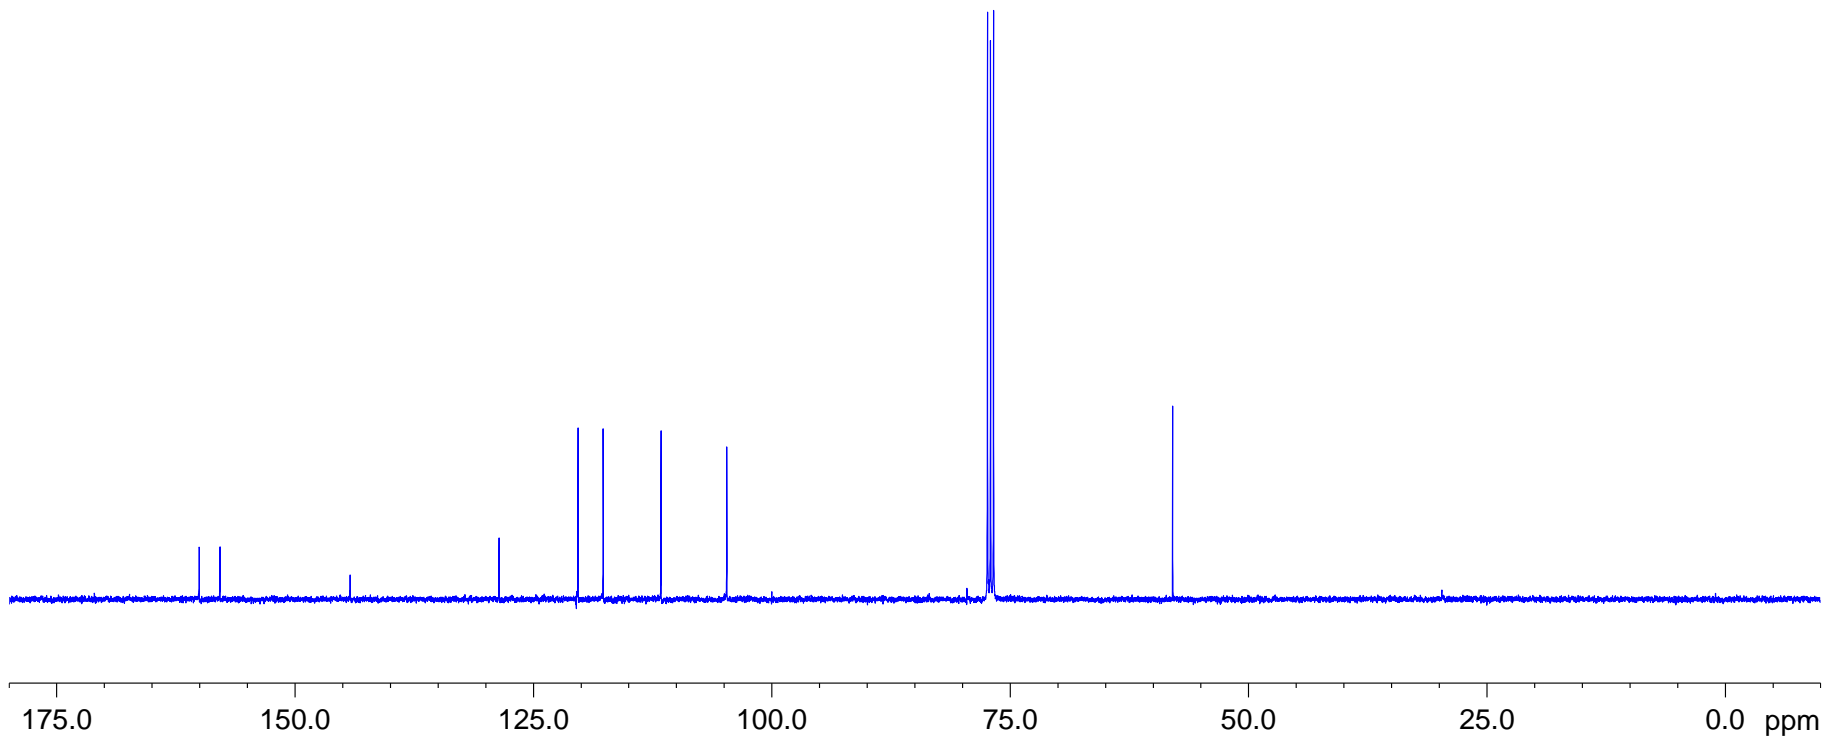

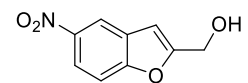

4b

120.297  
117.657  
111.597  
104.703  
57.941

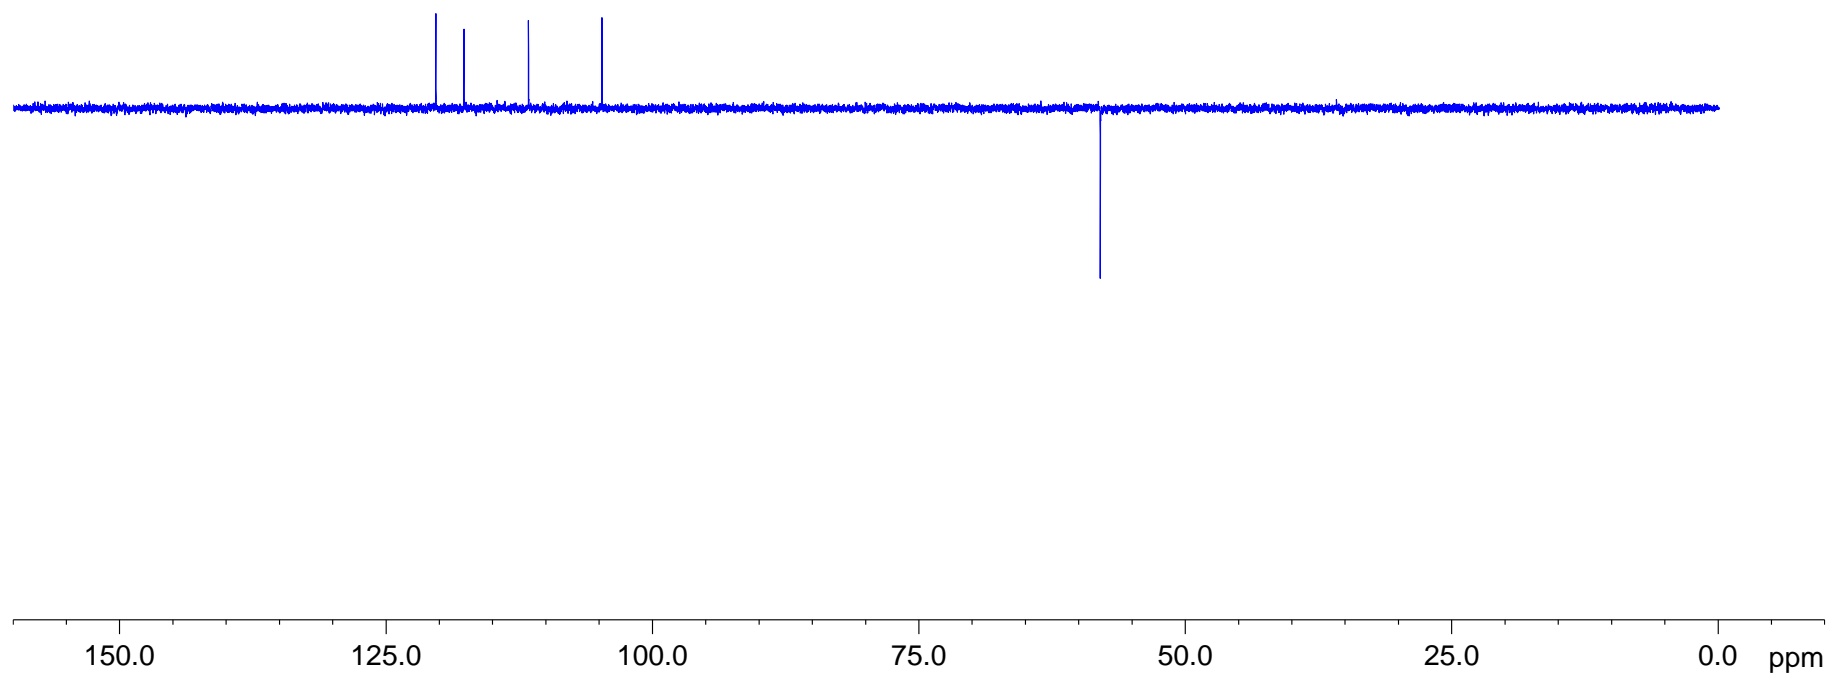

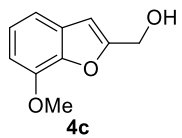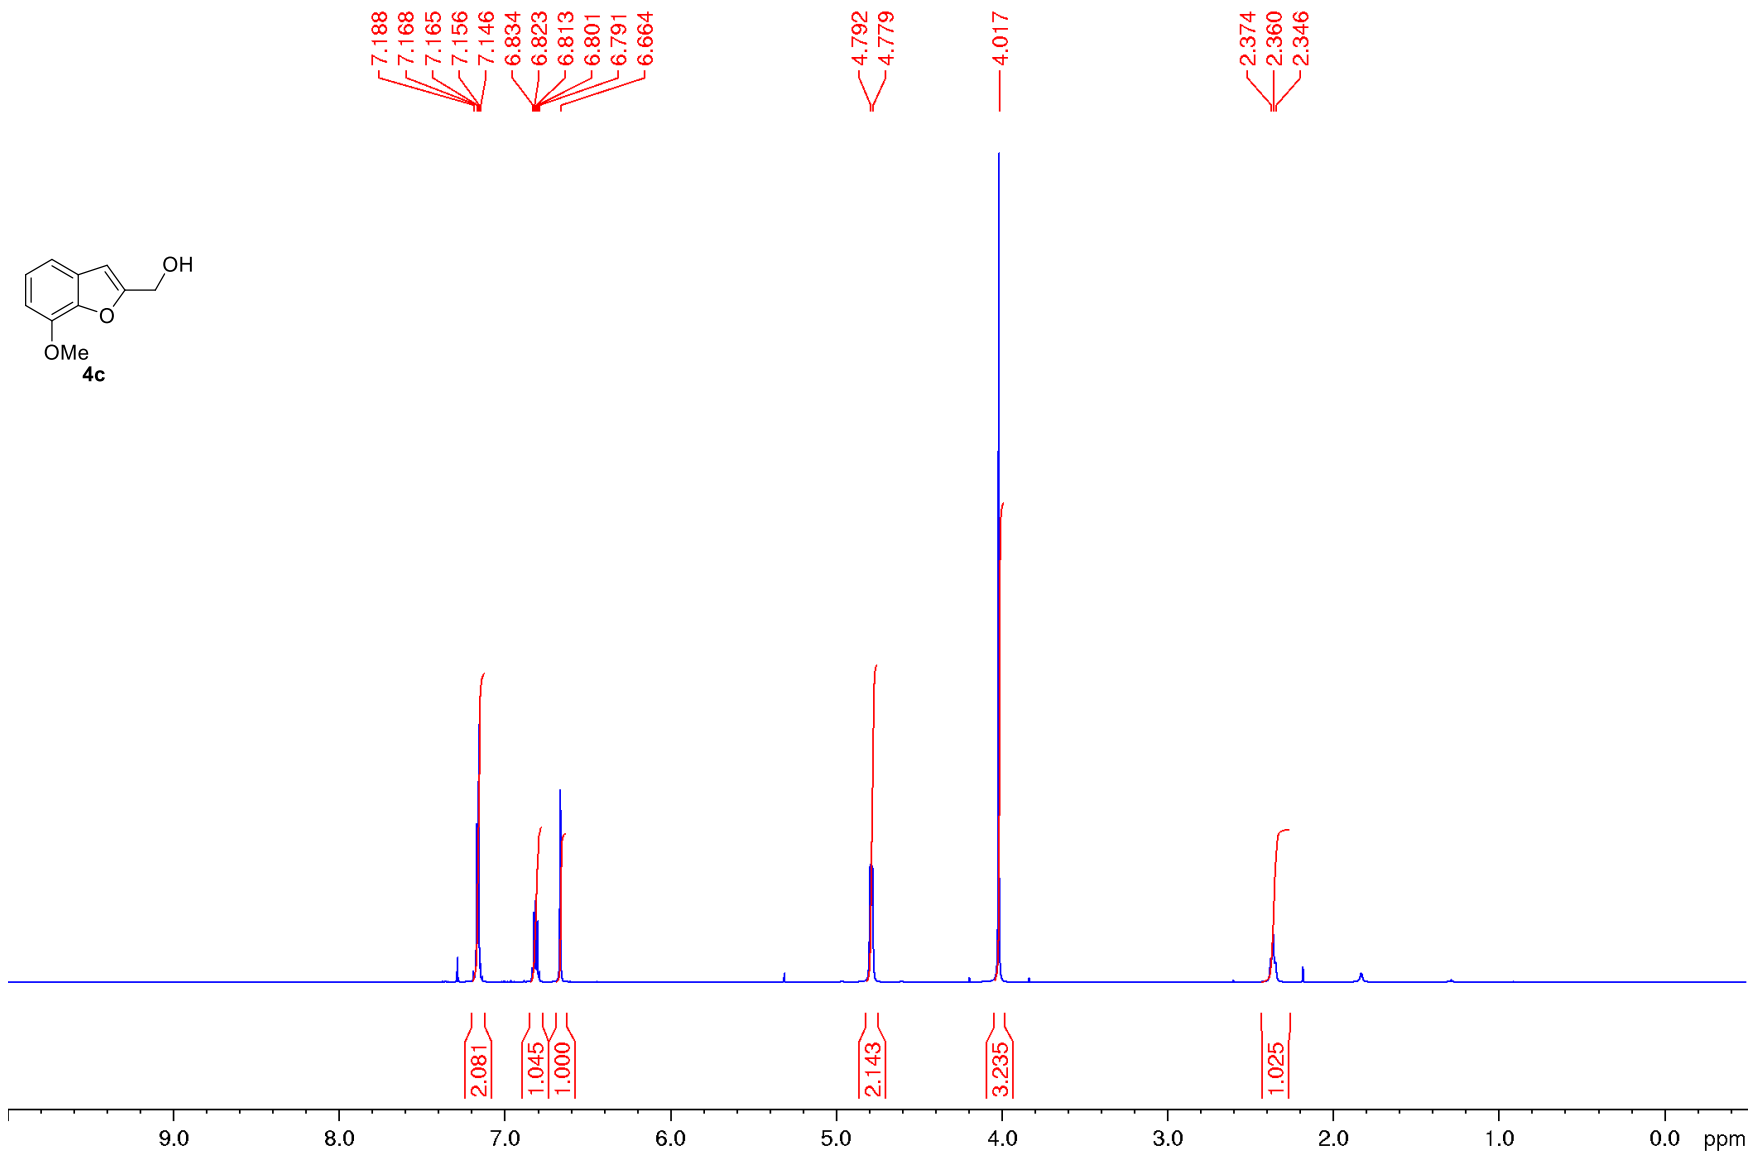



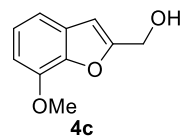

156.766  
145.260  
144.267  
129.830  
123.518  
113.514  
106.365  
104.423  
58.020  
55.990

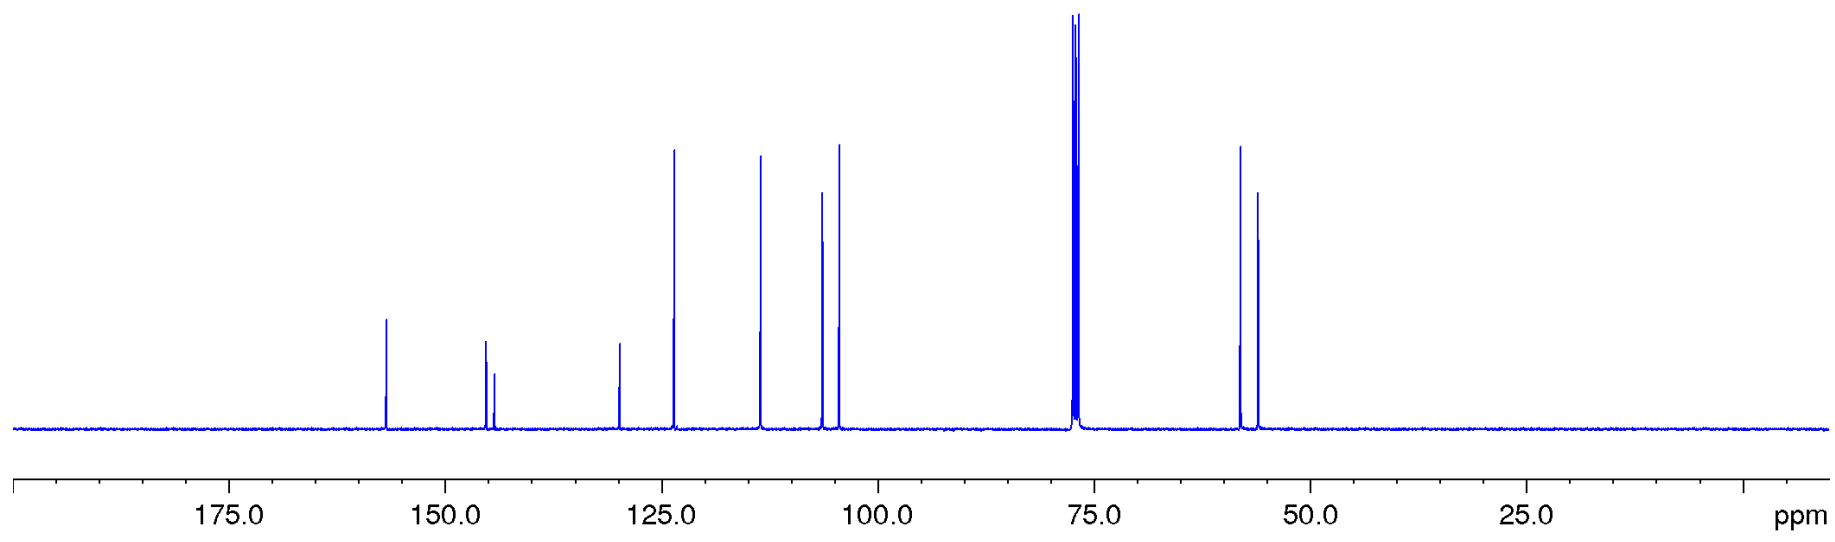

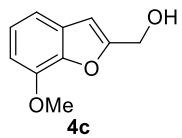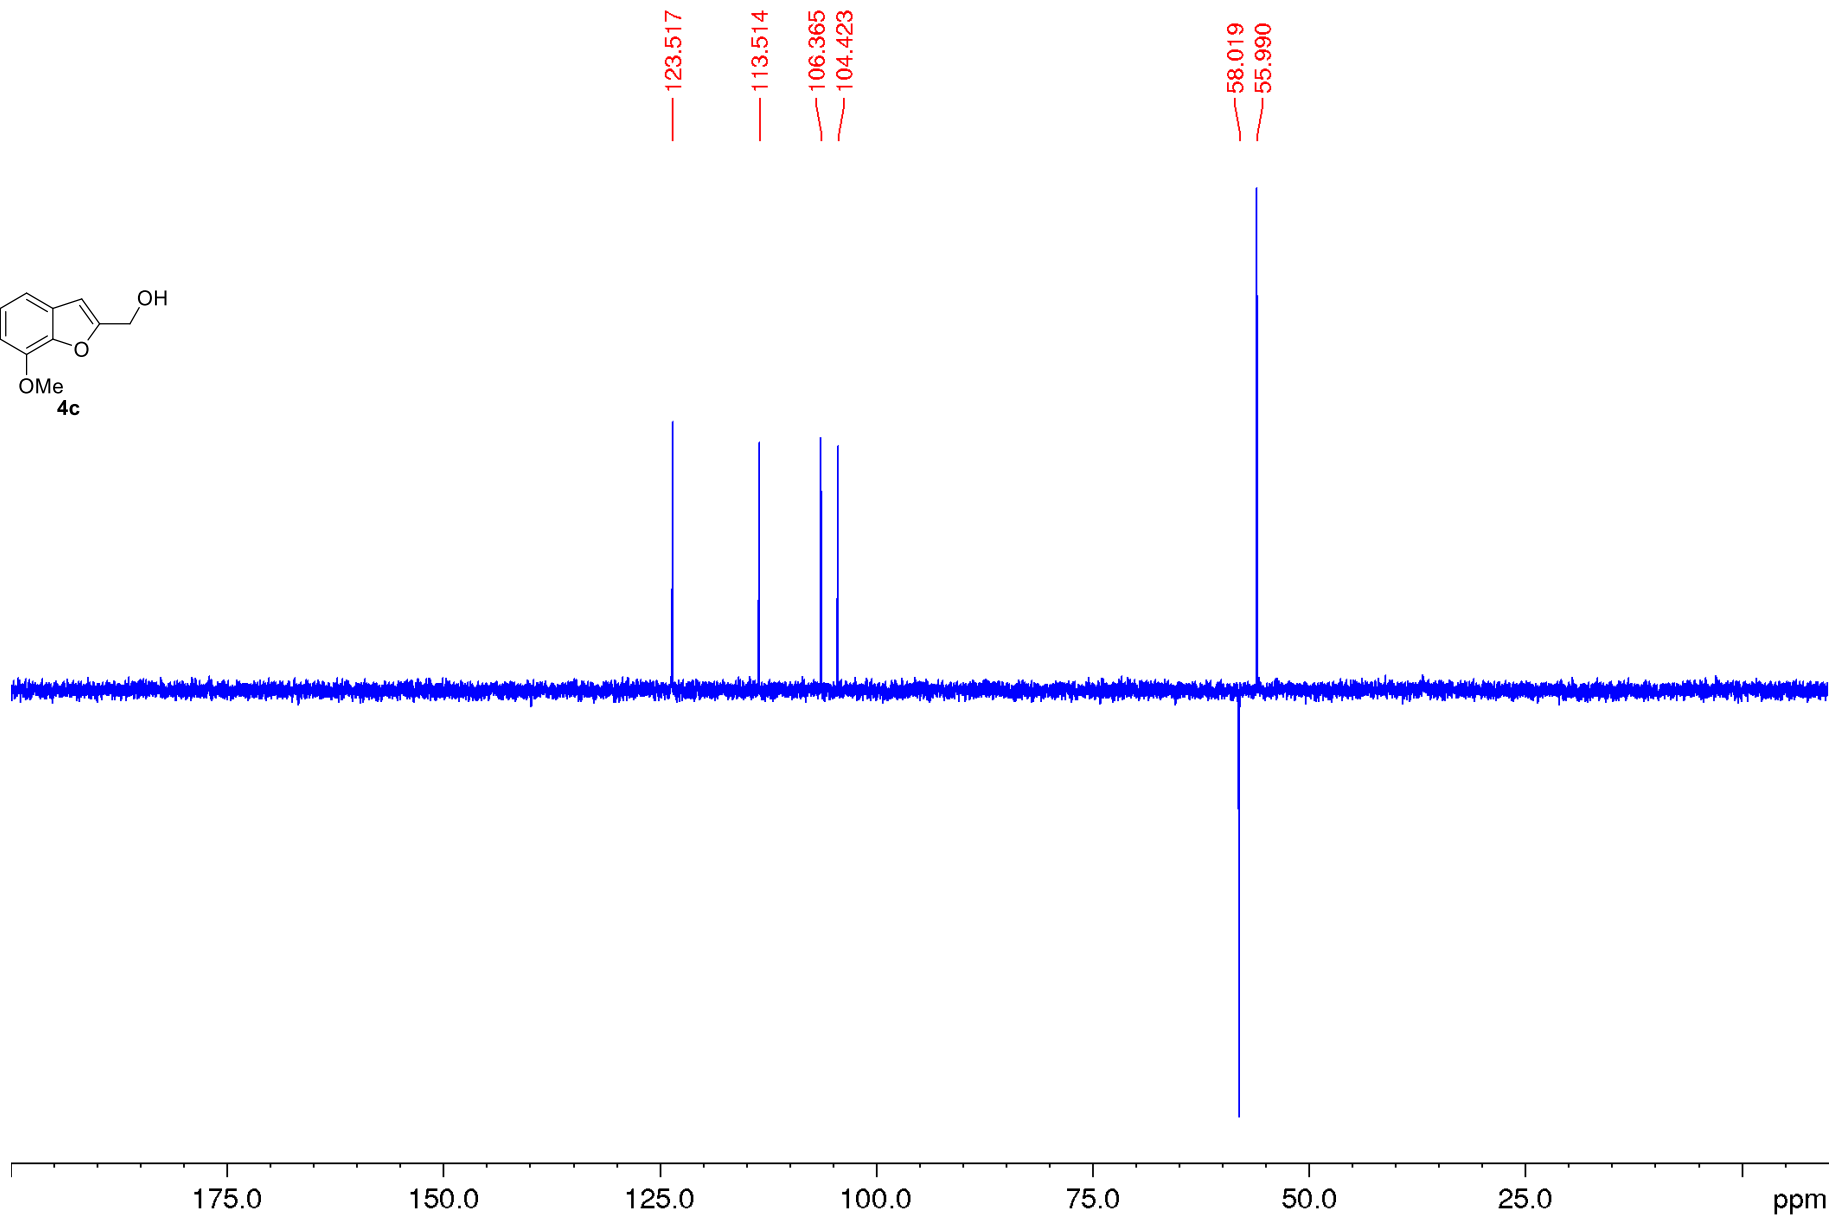

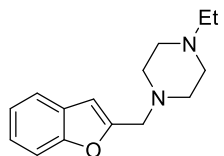

6aa

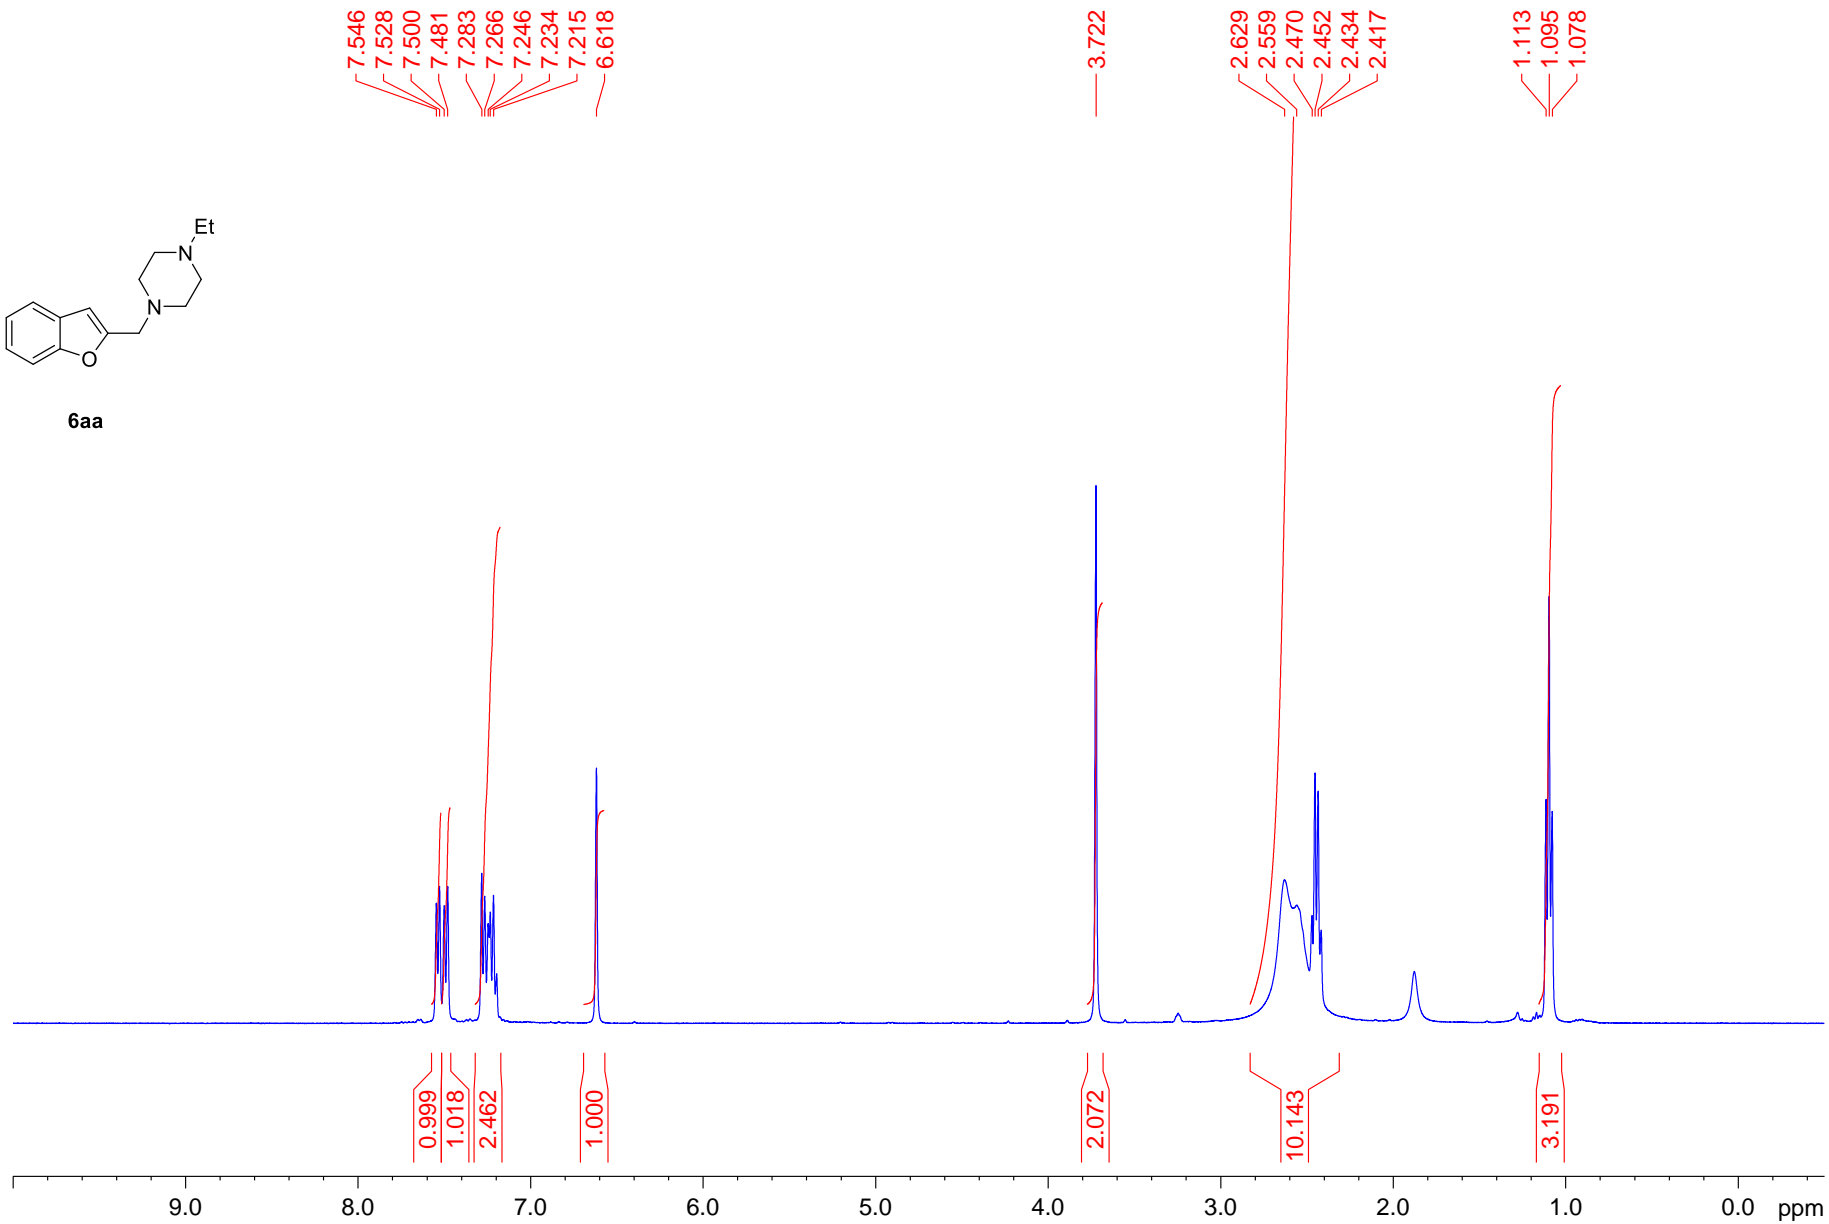

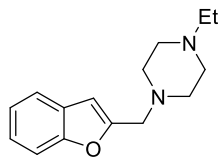

6aa

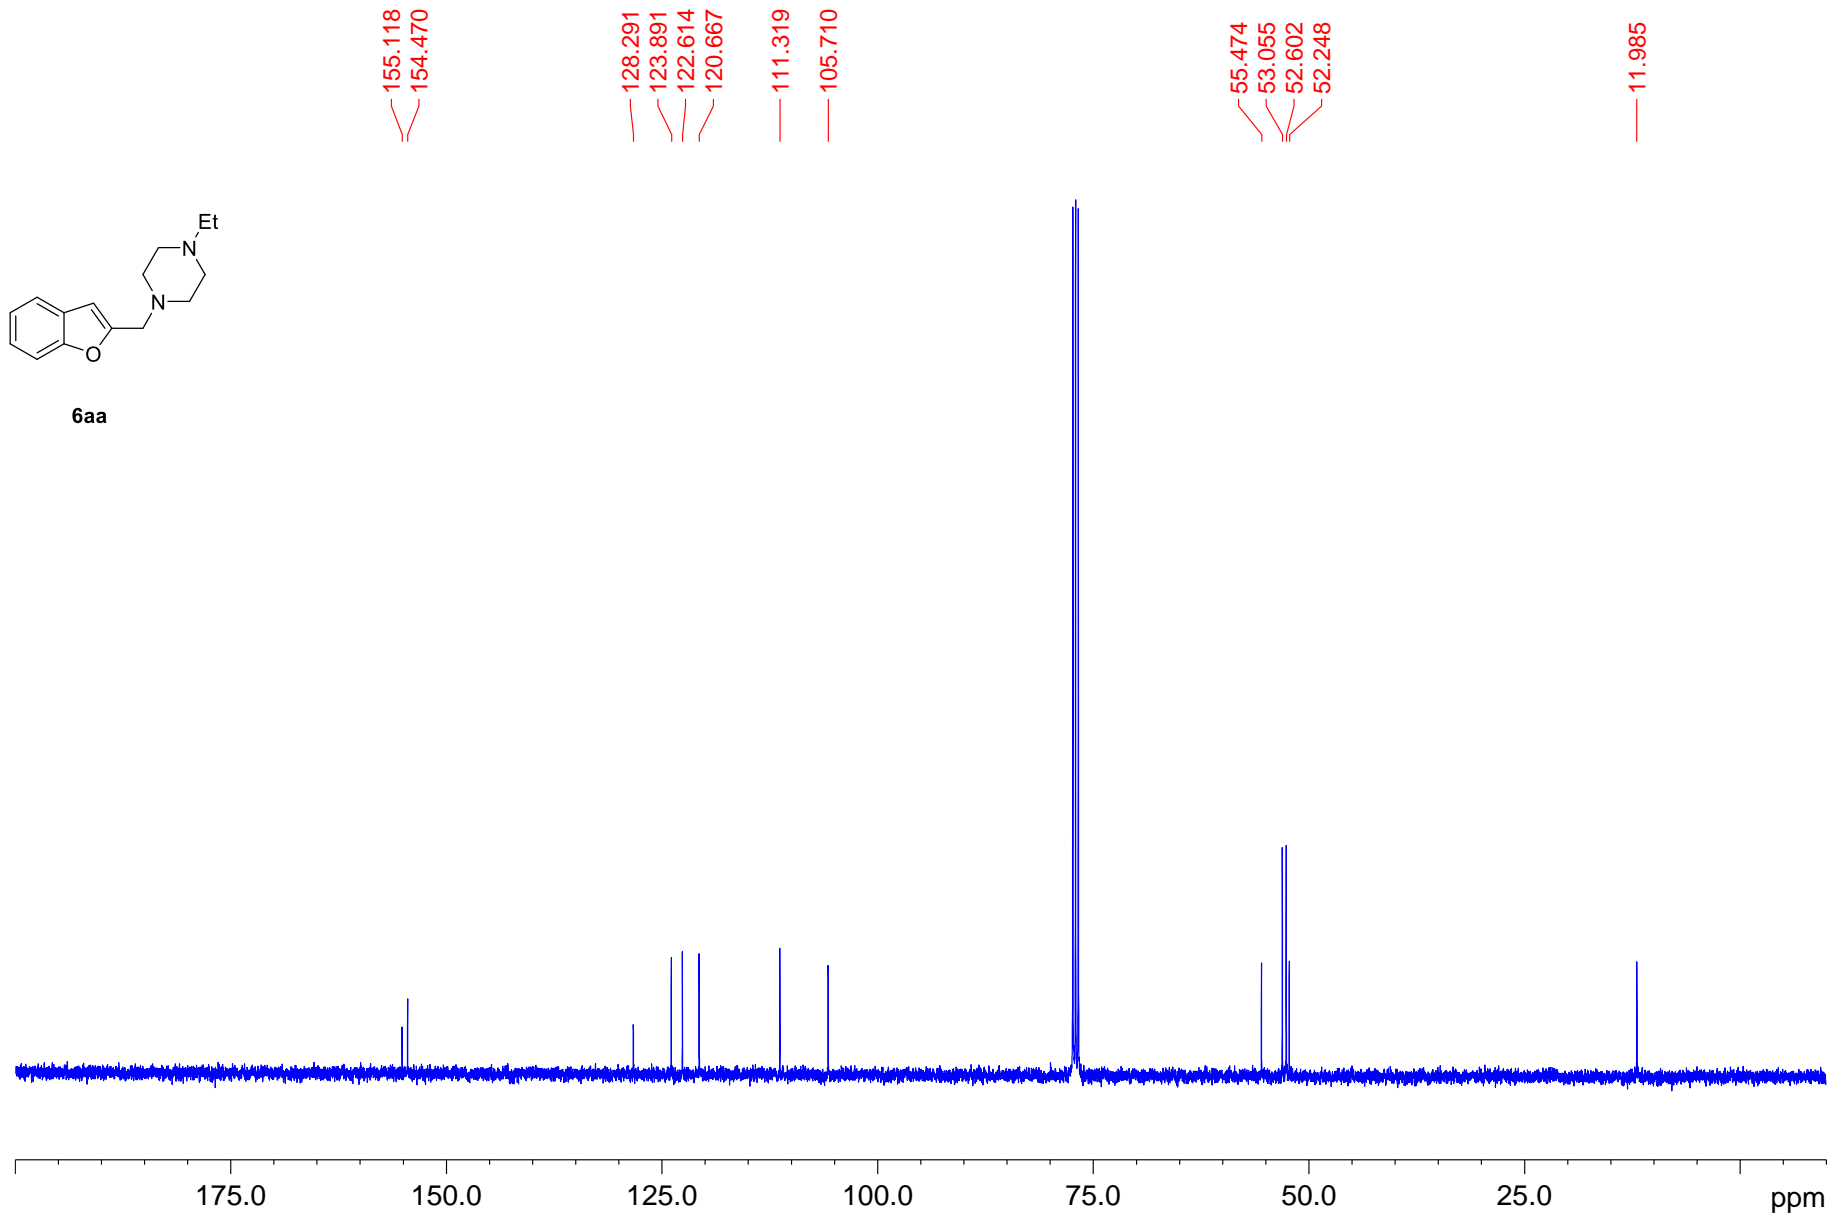

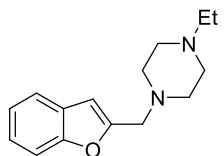

6aa

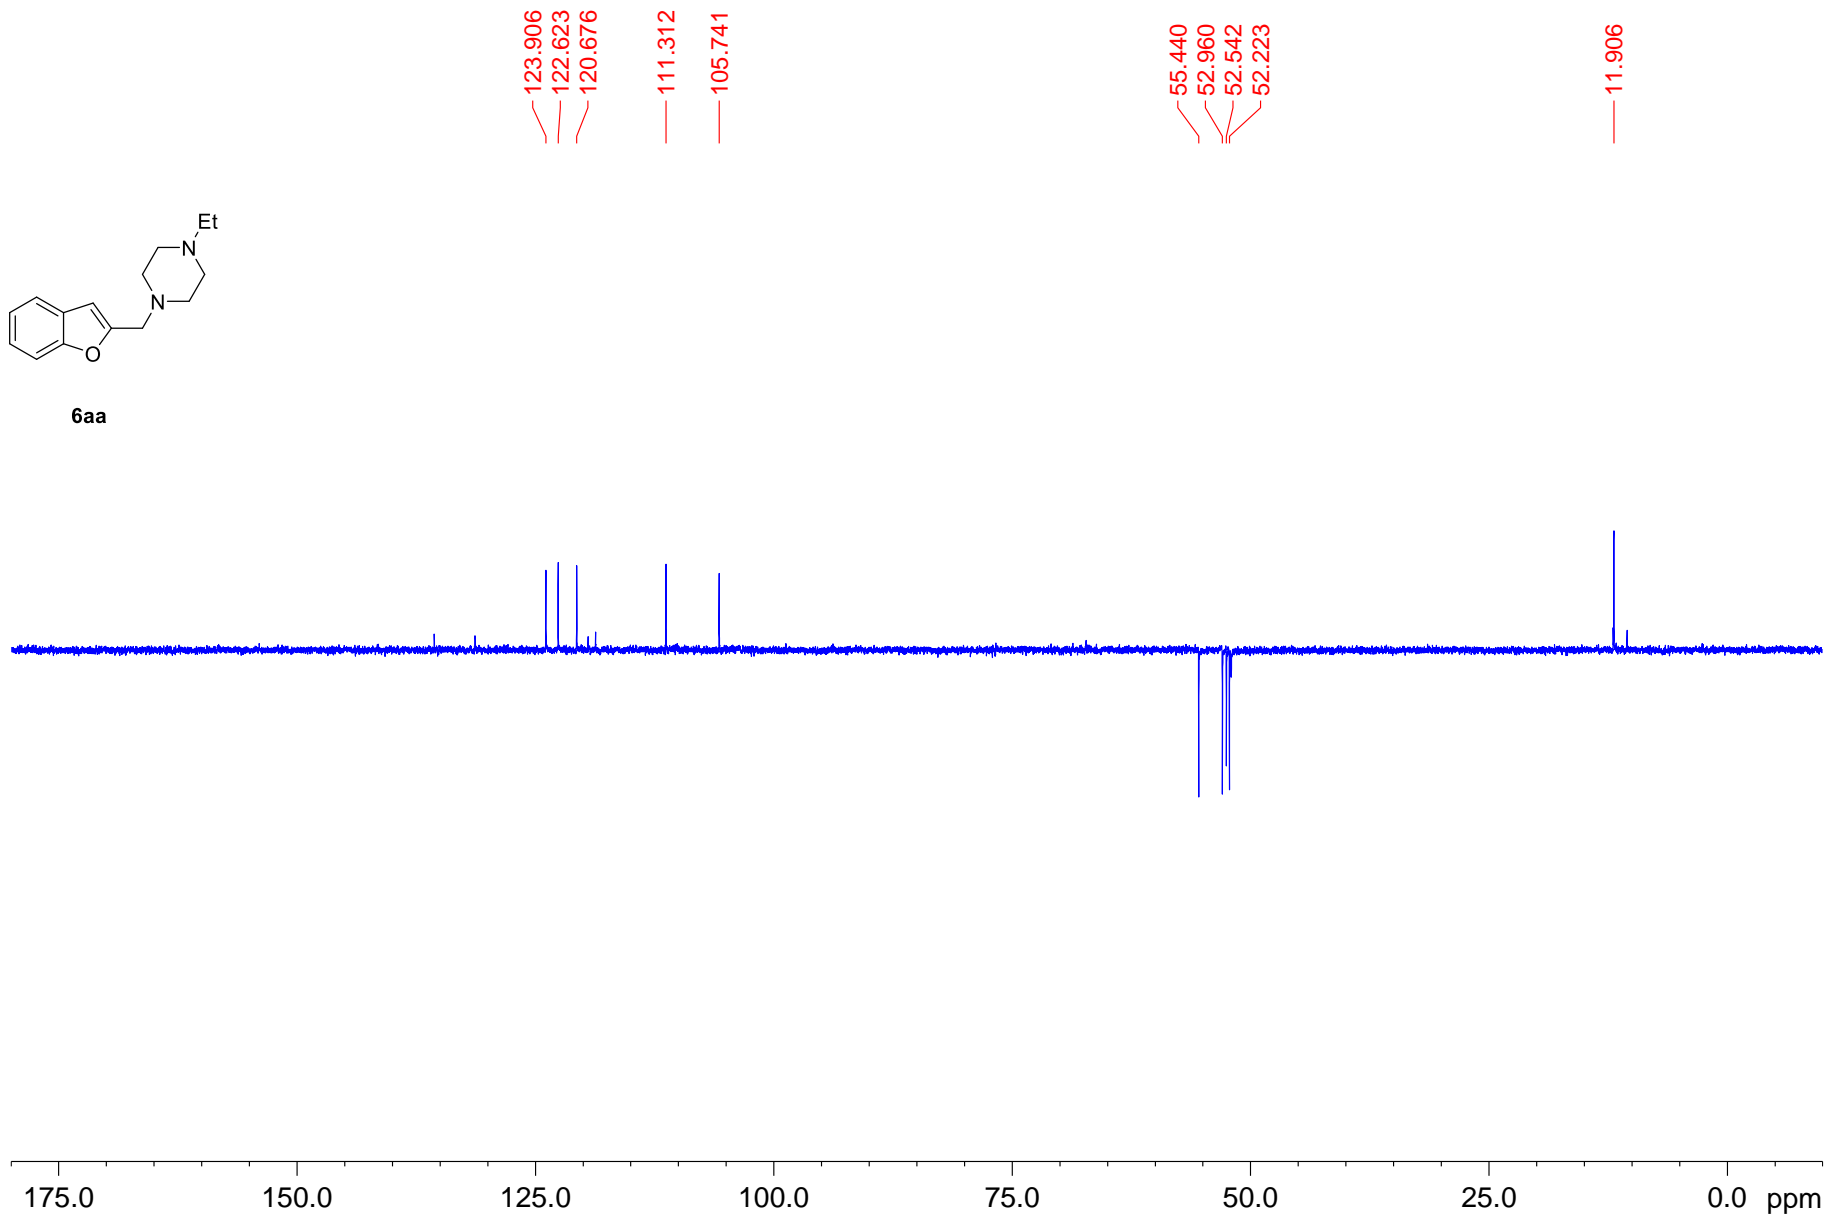

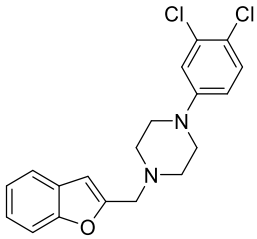

6ab

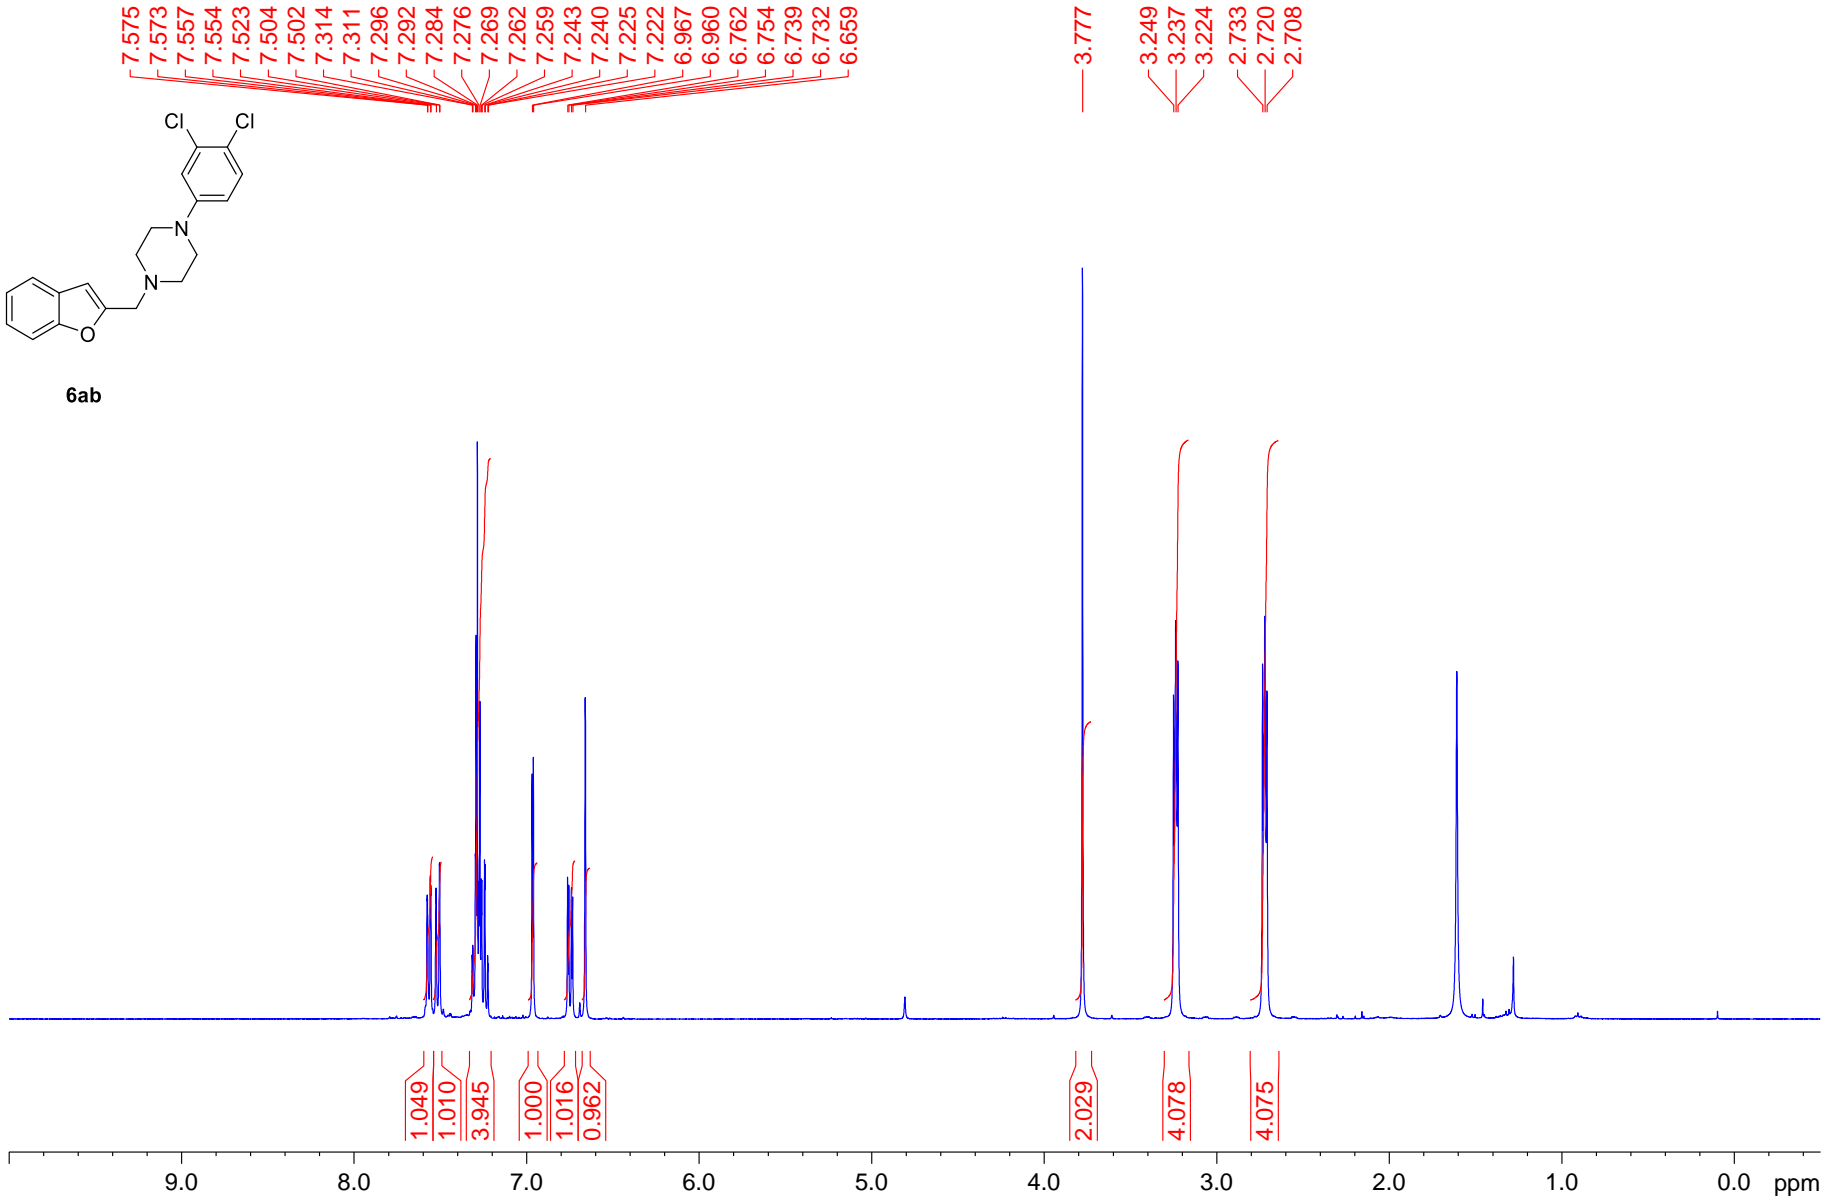

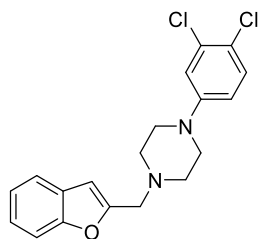

6ab

155.156  
154.019  
150.613

132.792  
130.435  
128.193  
124.102  
122.765  
122.205  
120.774  
117.276  
115.343  
111.348  
105.946

55.398  
52.699  
48.584

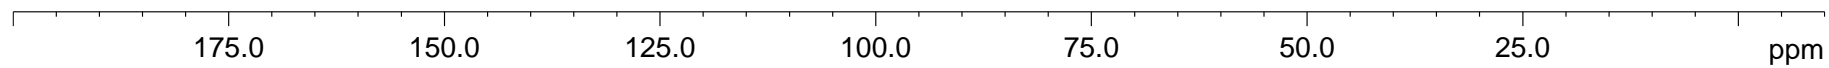

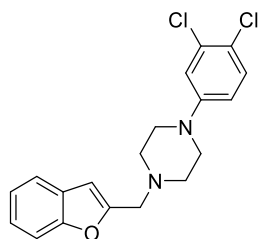

**6ab**

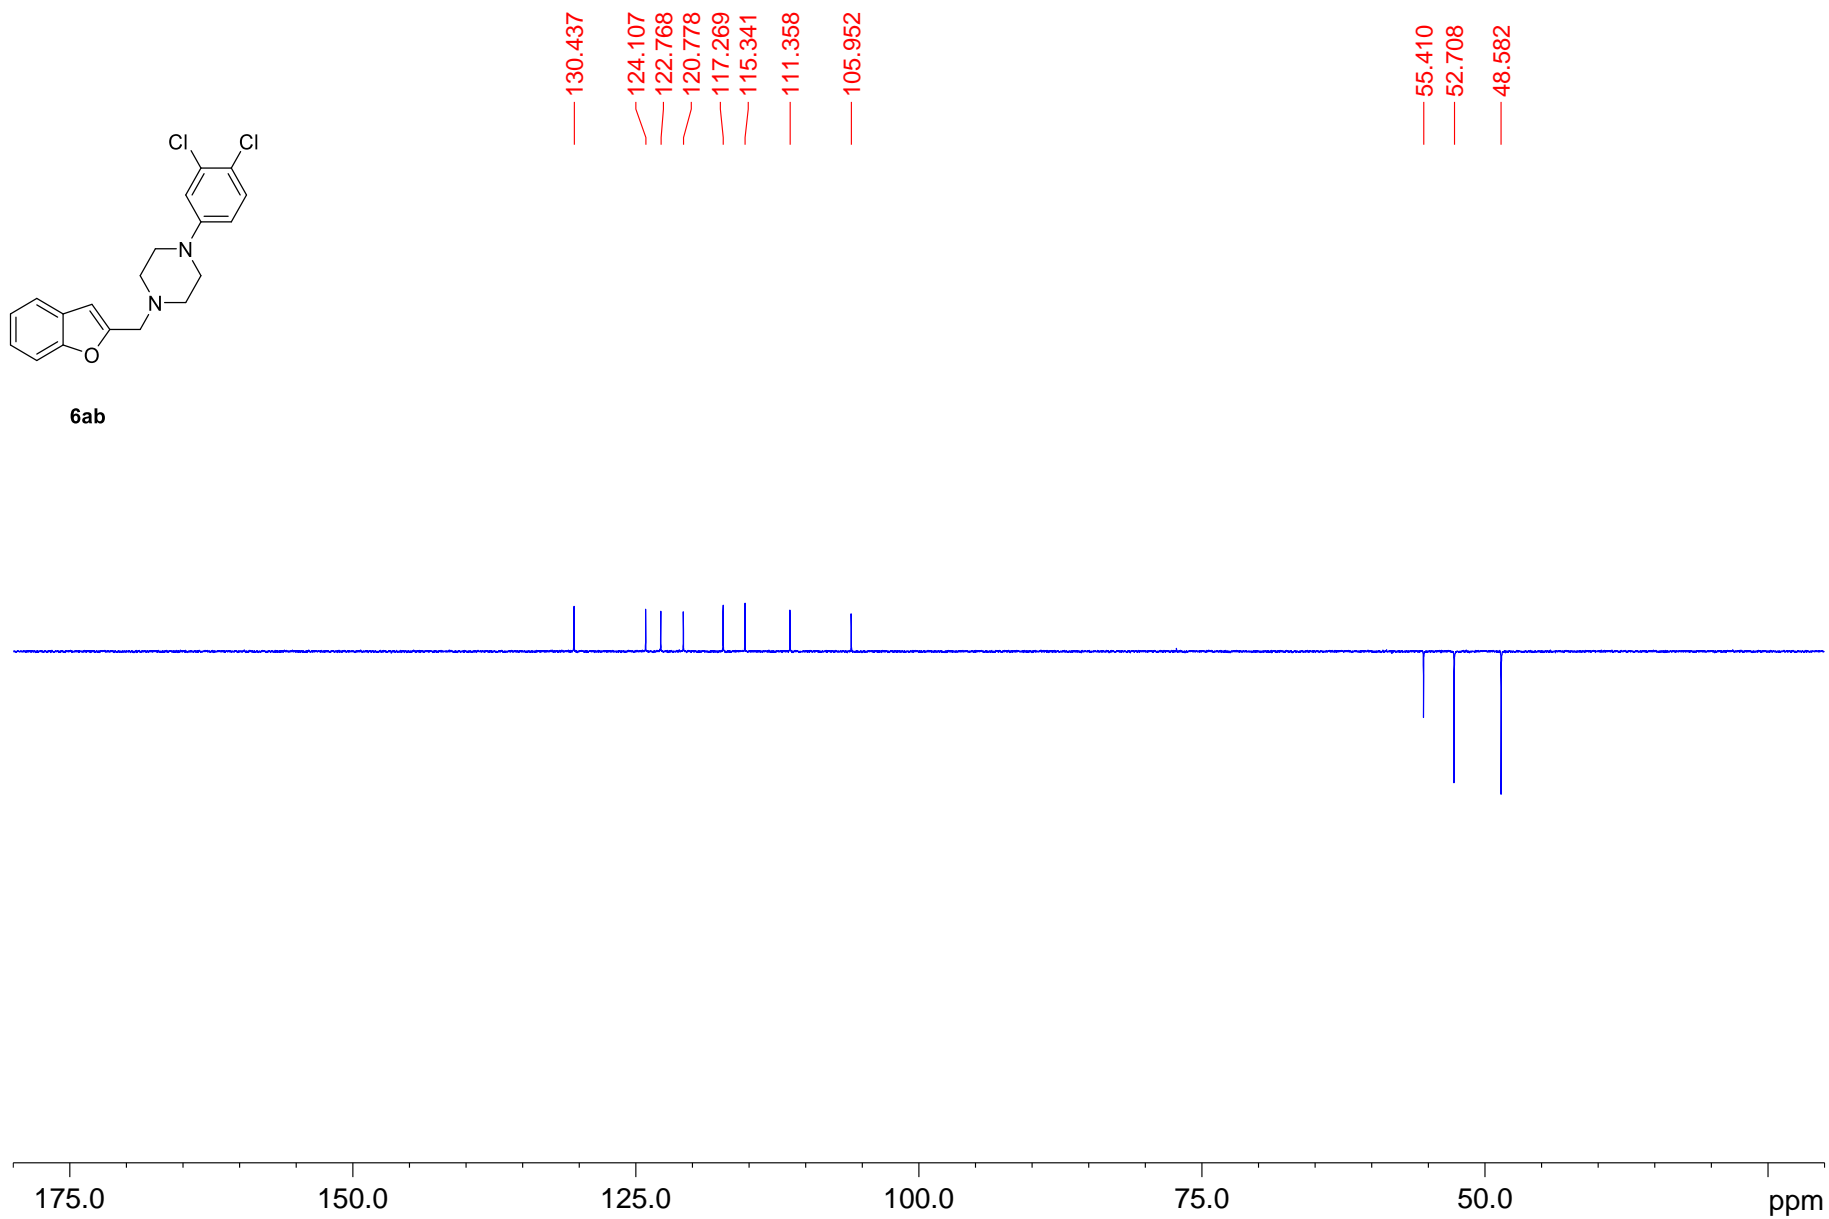



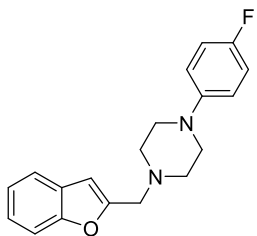

6ac

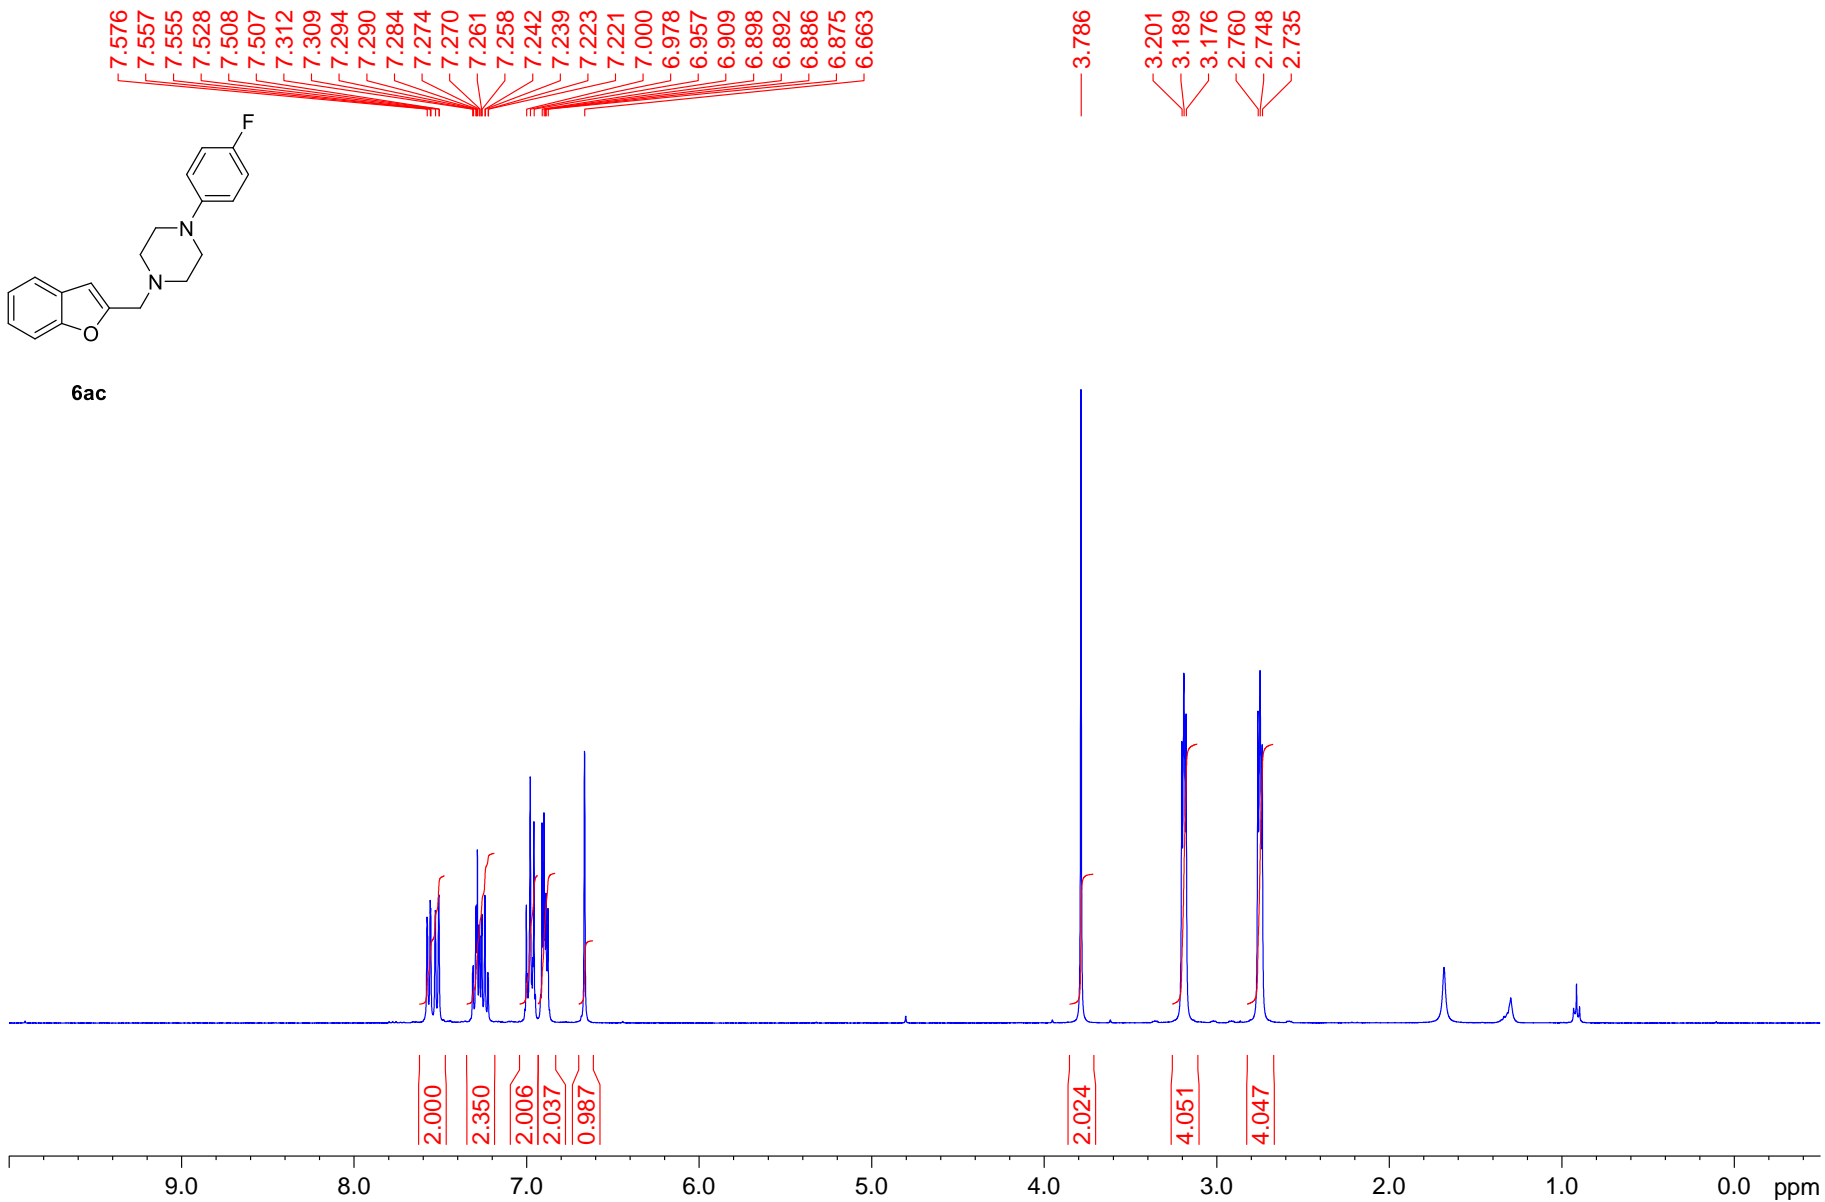



6ac

158.412  
156.037  
155.156  
154.233  
147.958  
147.937

128.248  
124.037  
122.724  
120.747  
117.971  
117.896  
115.630  
115.411  
111.350  
105.873

55.456  
53.071  
50.104

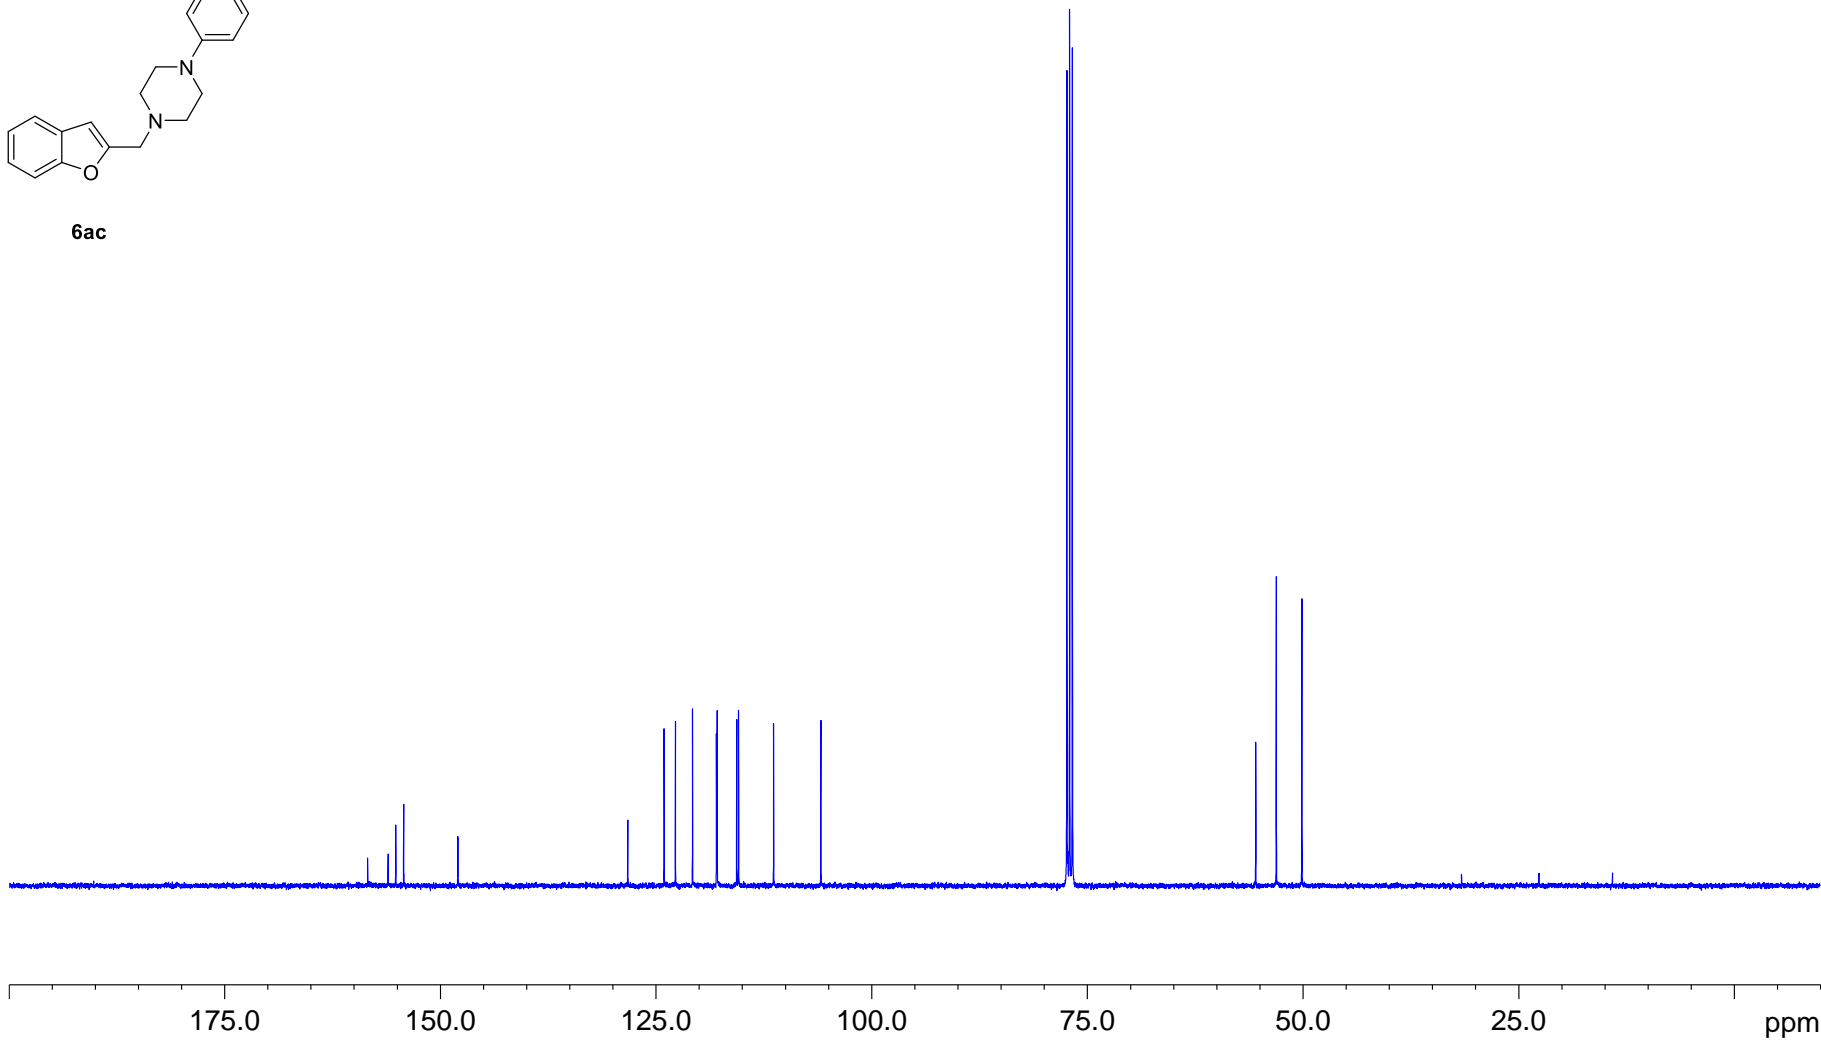

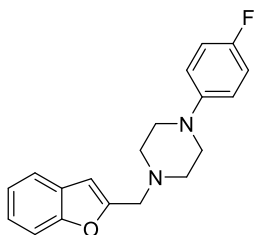

6ac

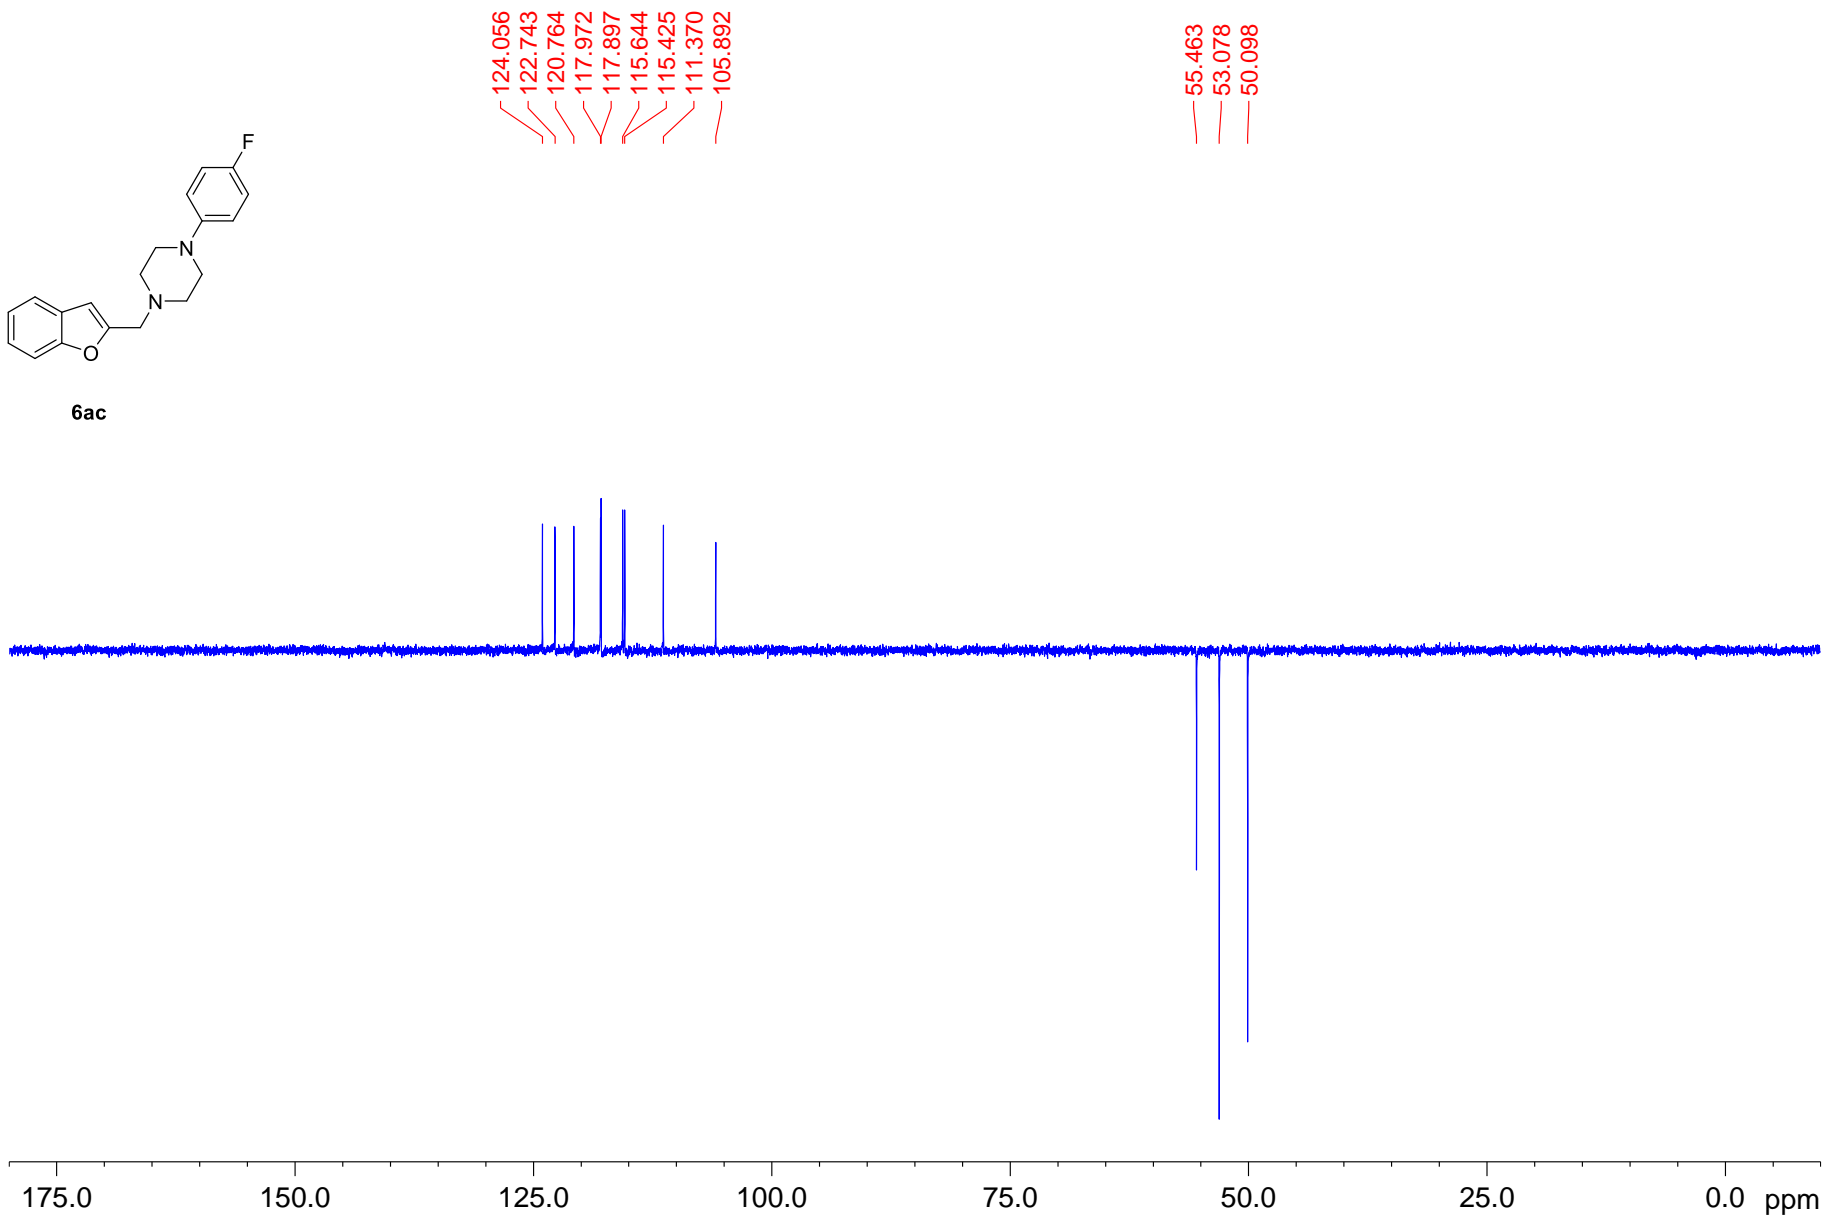

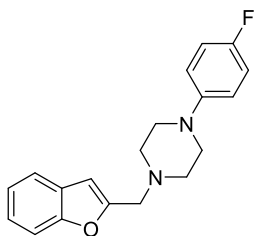

**6ac**

-124.496

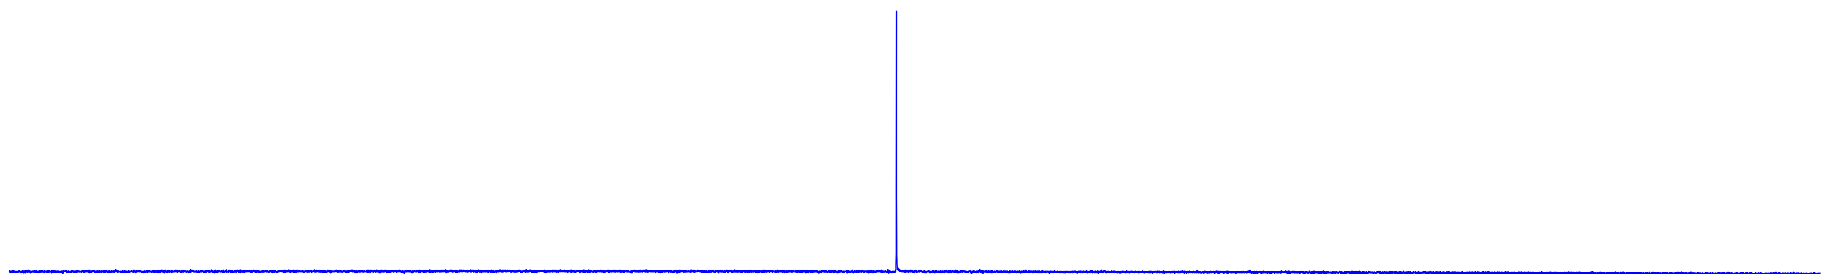

-125.0

ppm

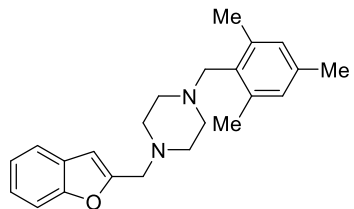

**6ad**

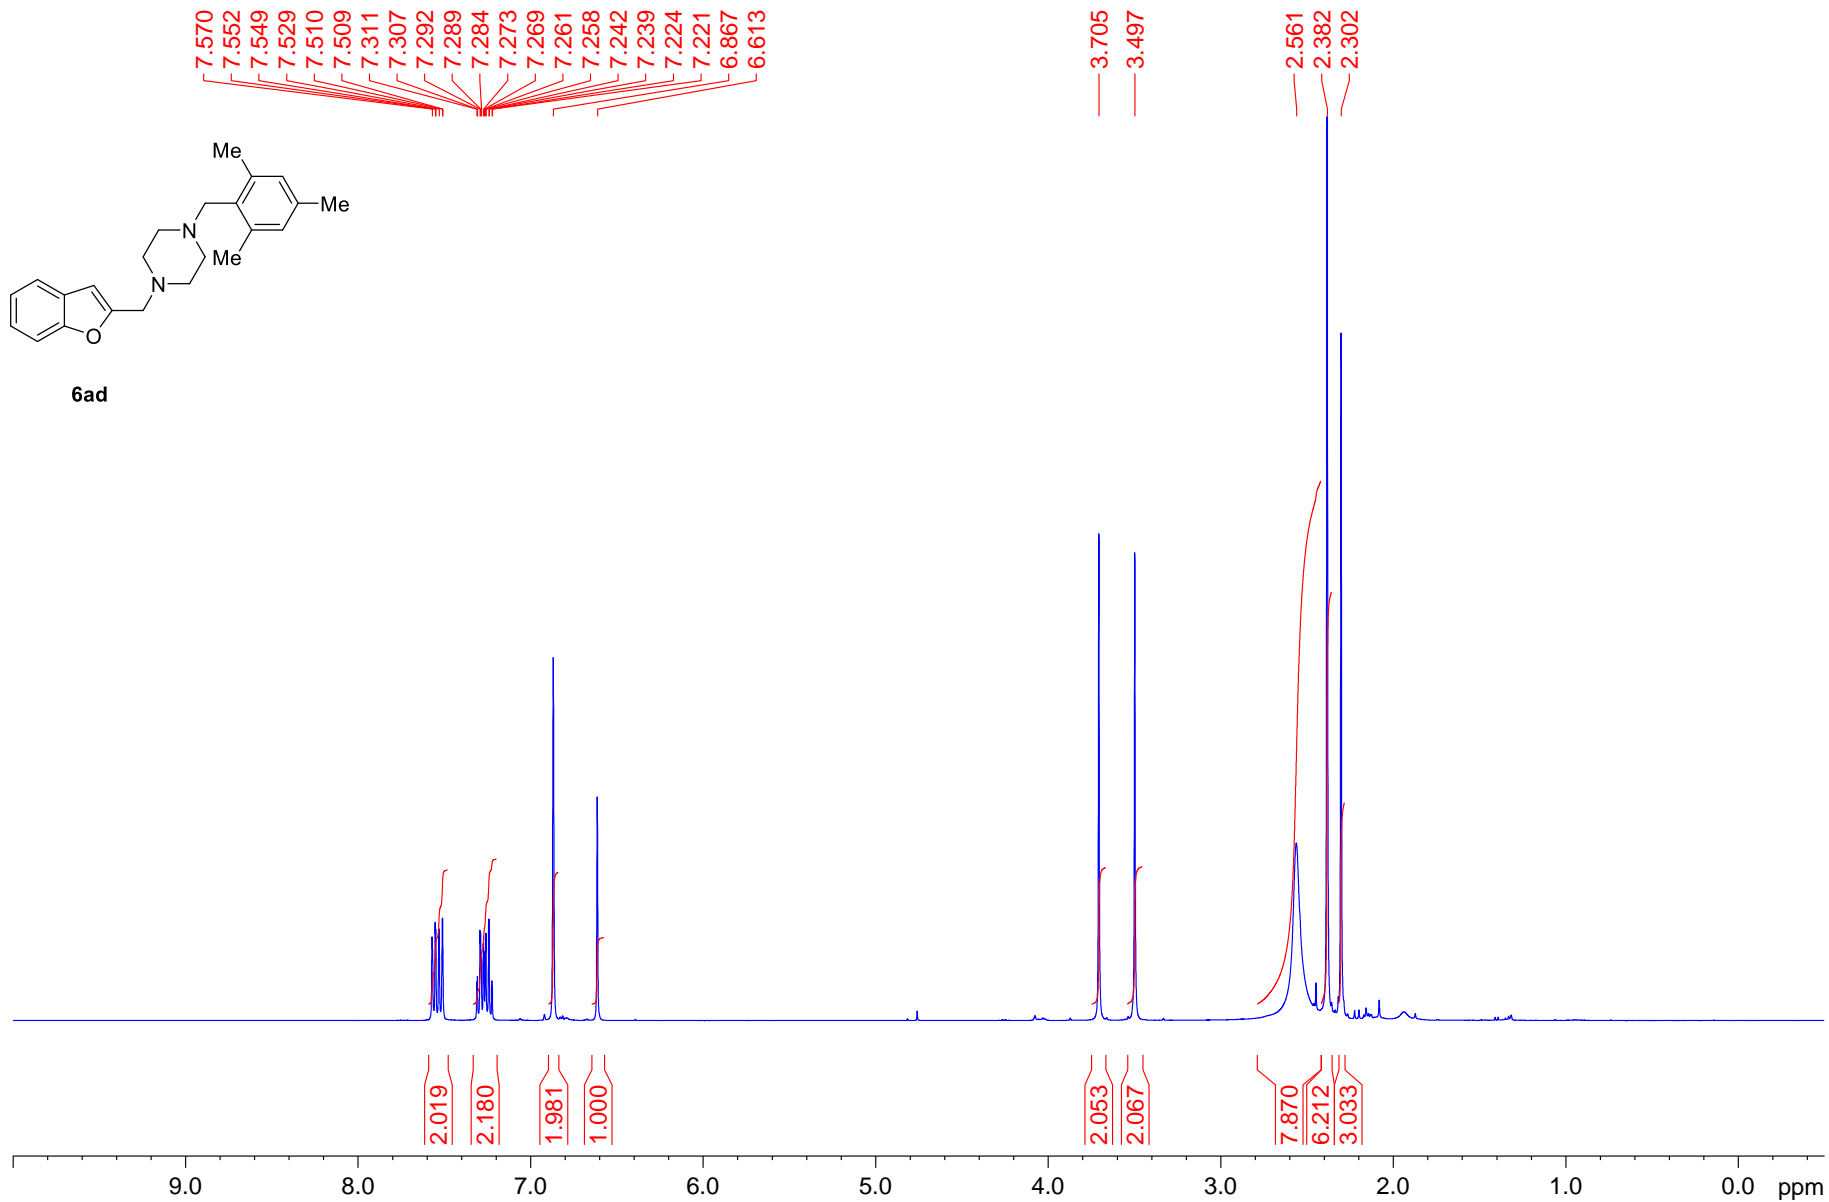

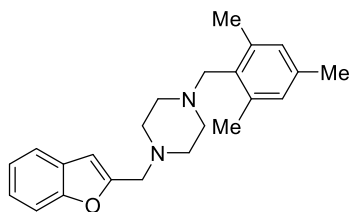

6ad

155.126  
154.747

138.126  
136.293  
131.875  
128.862  
128.361  
123.866  
122.620  
120.682

111.343  
105.543

55.769  
55.526  
53.464  
52.518

20.924  
20.062

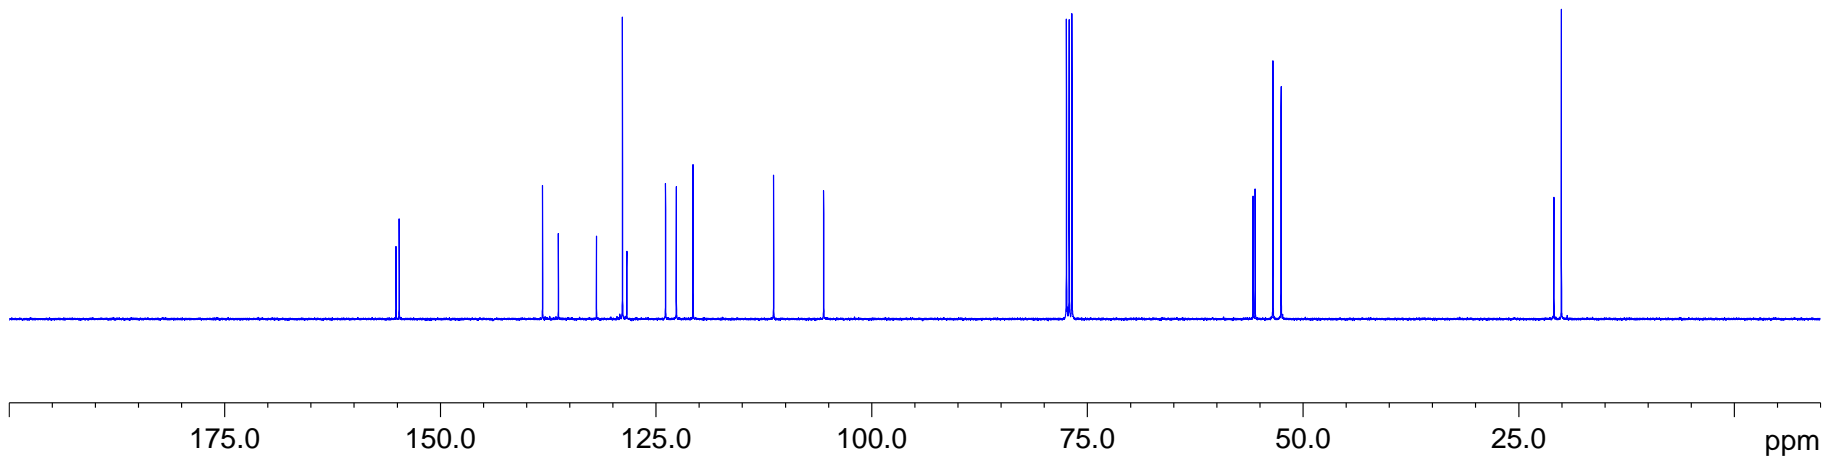

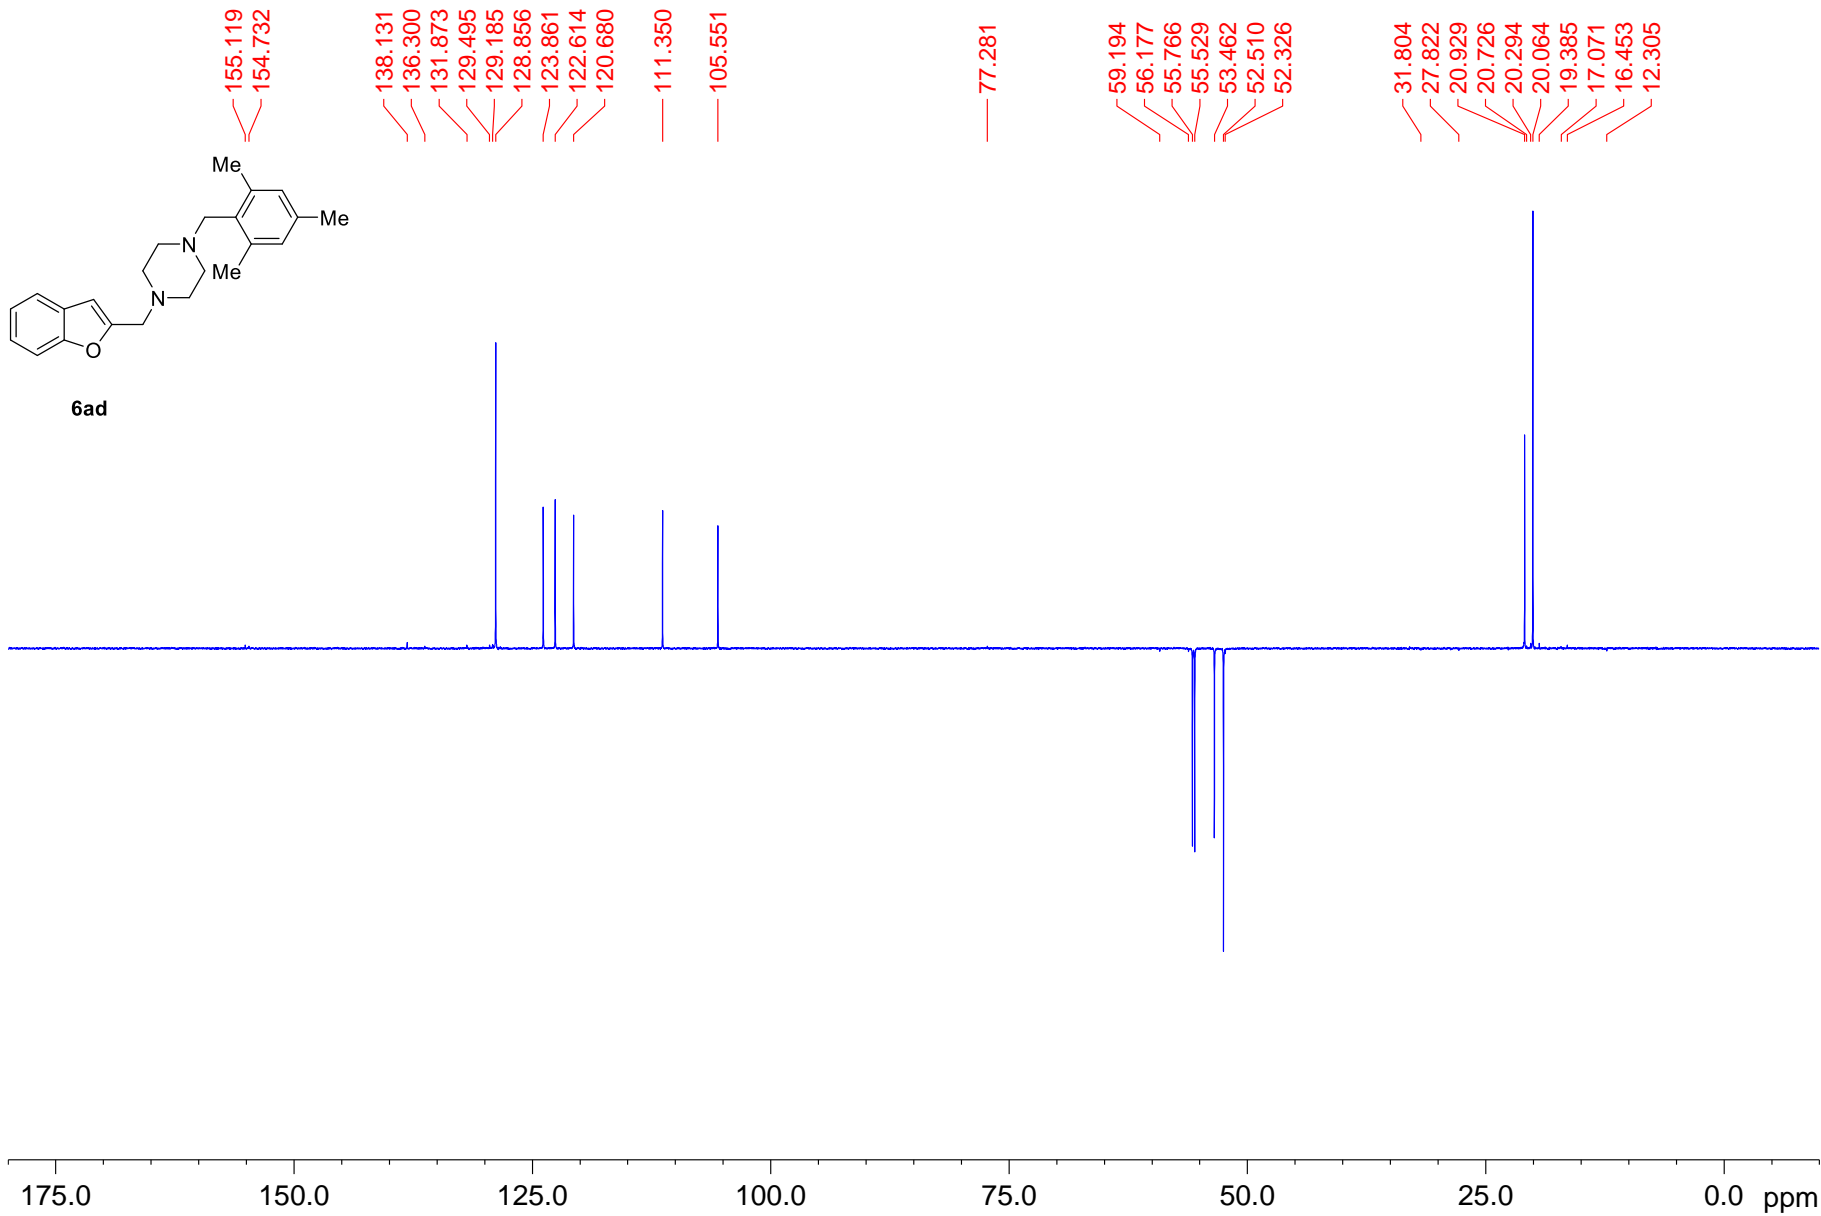

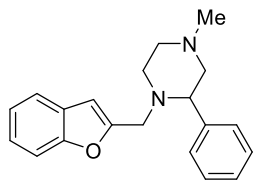

**6ae**

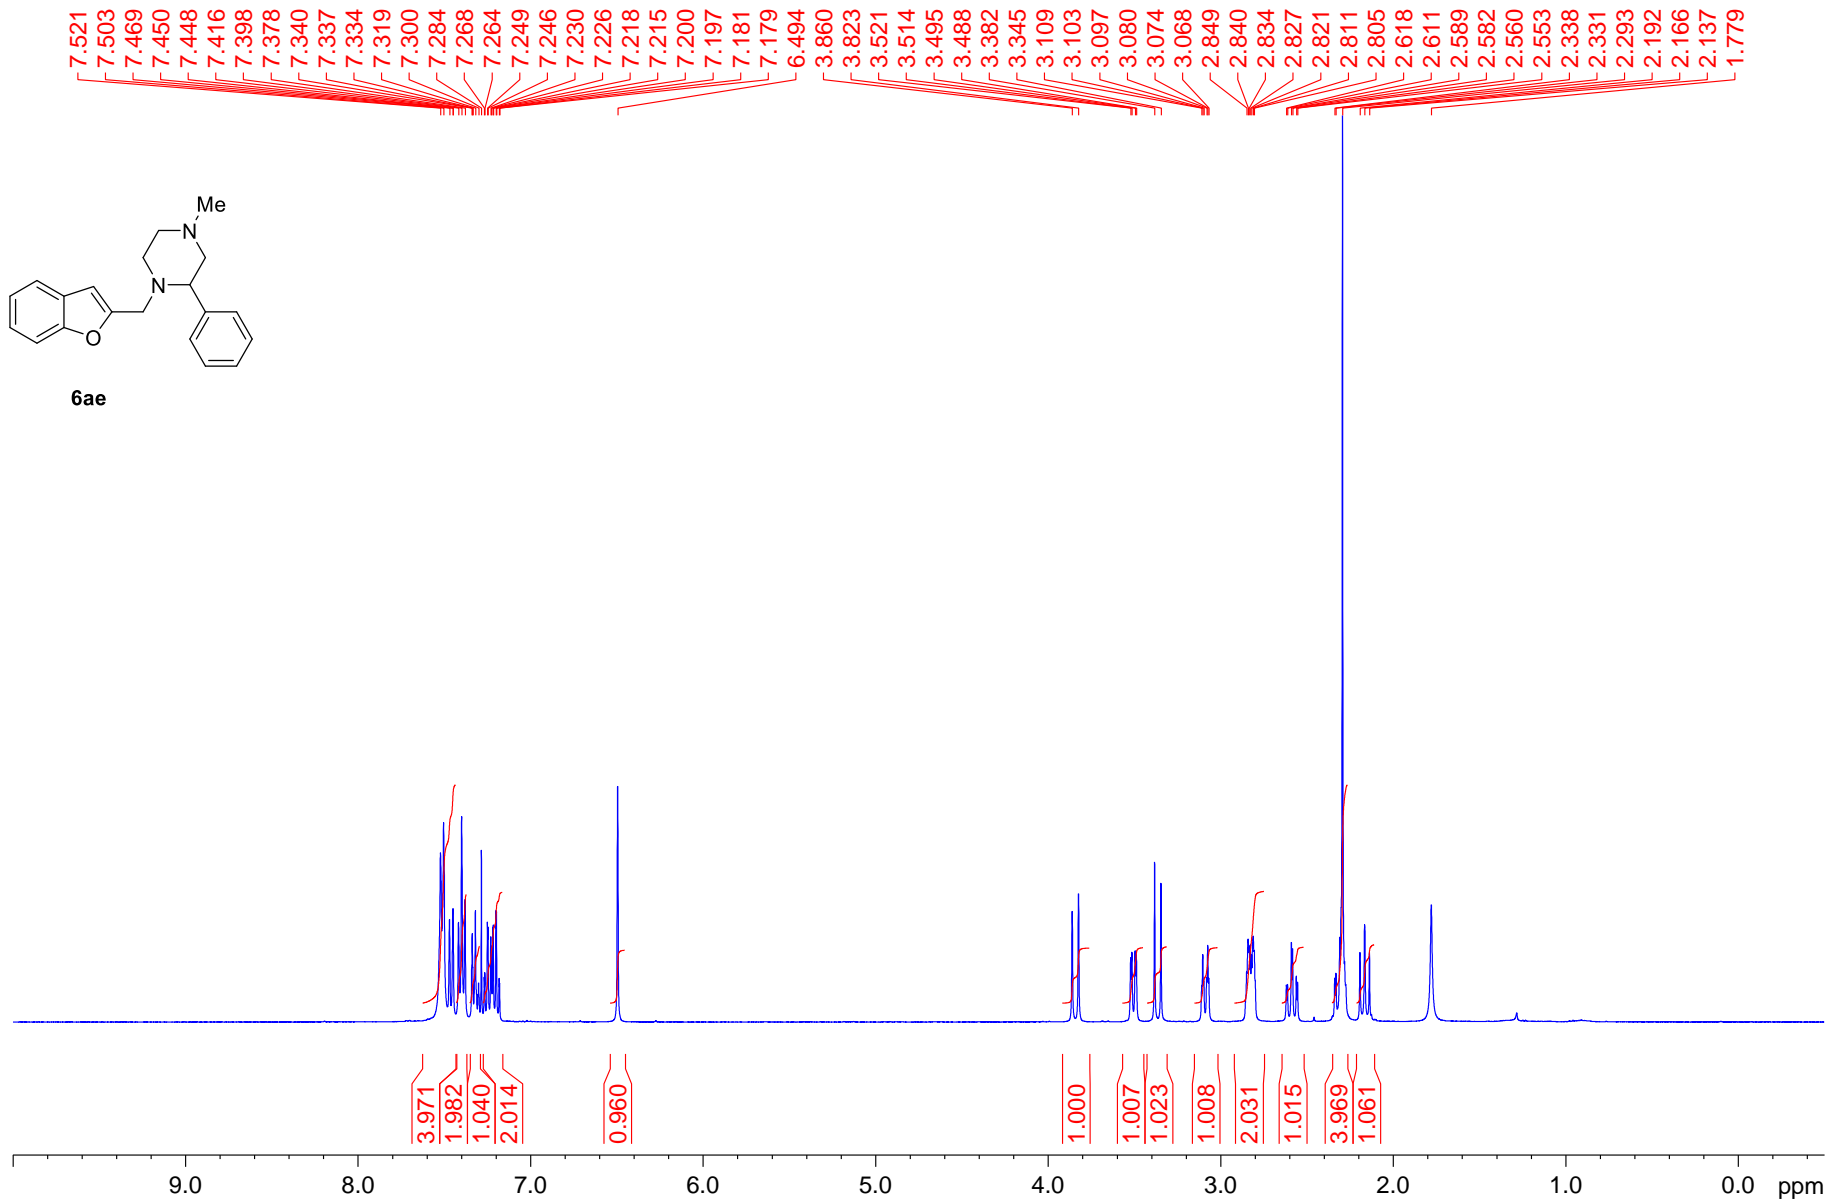





6ae

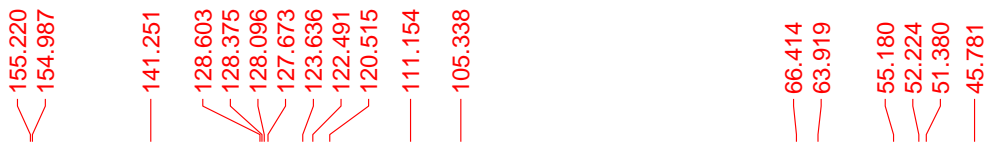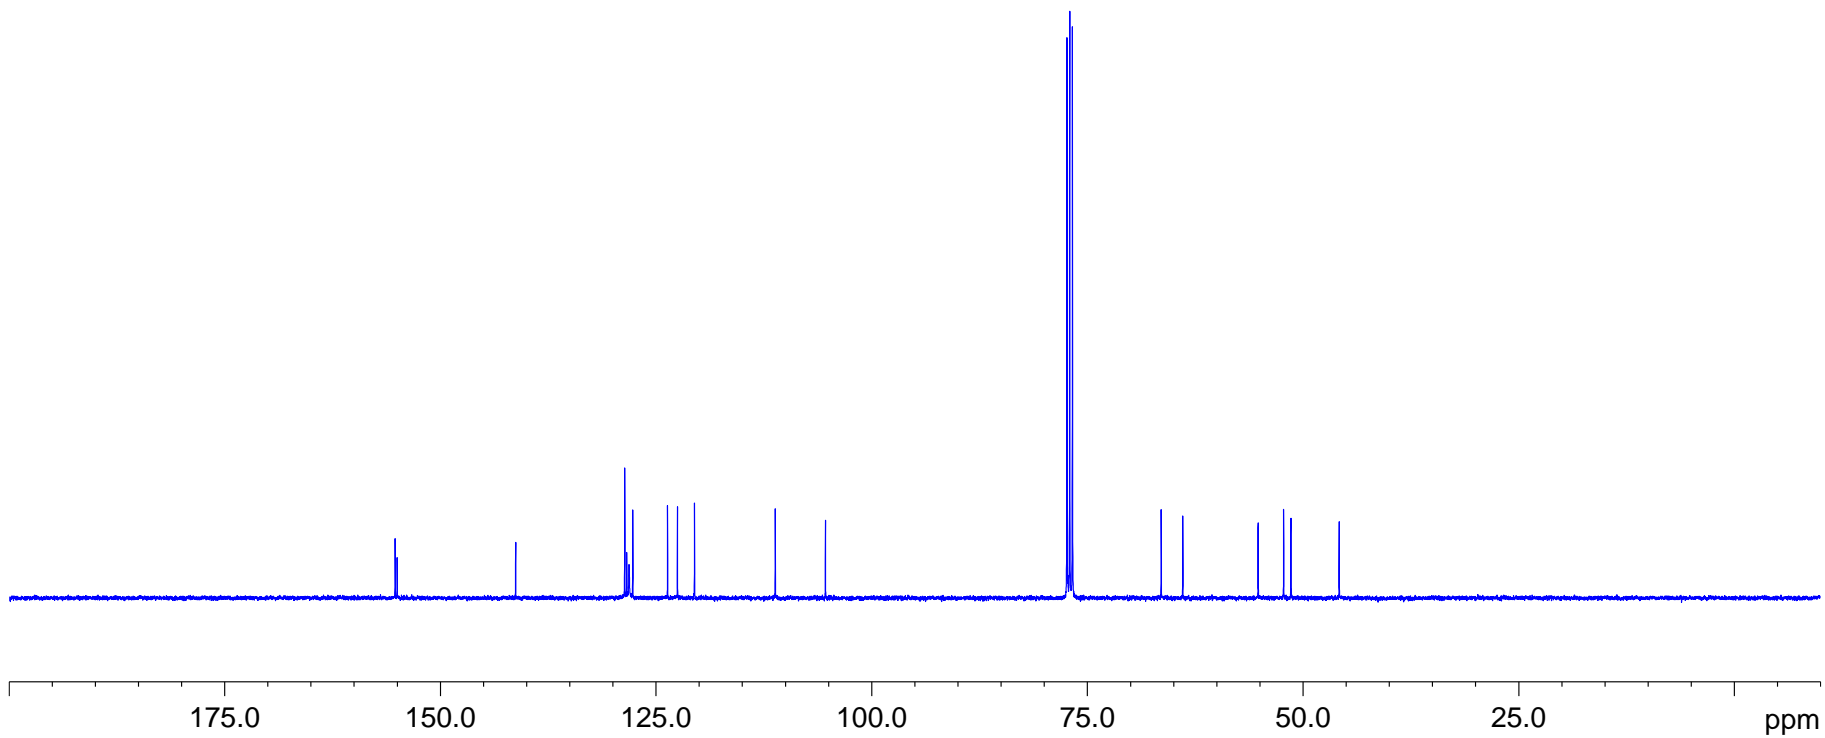

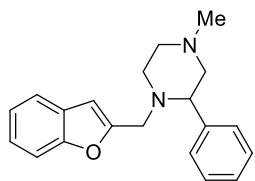

6ae

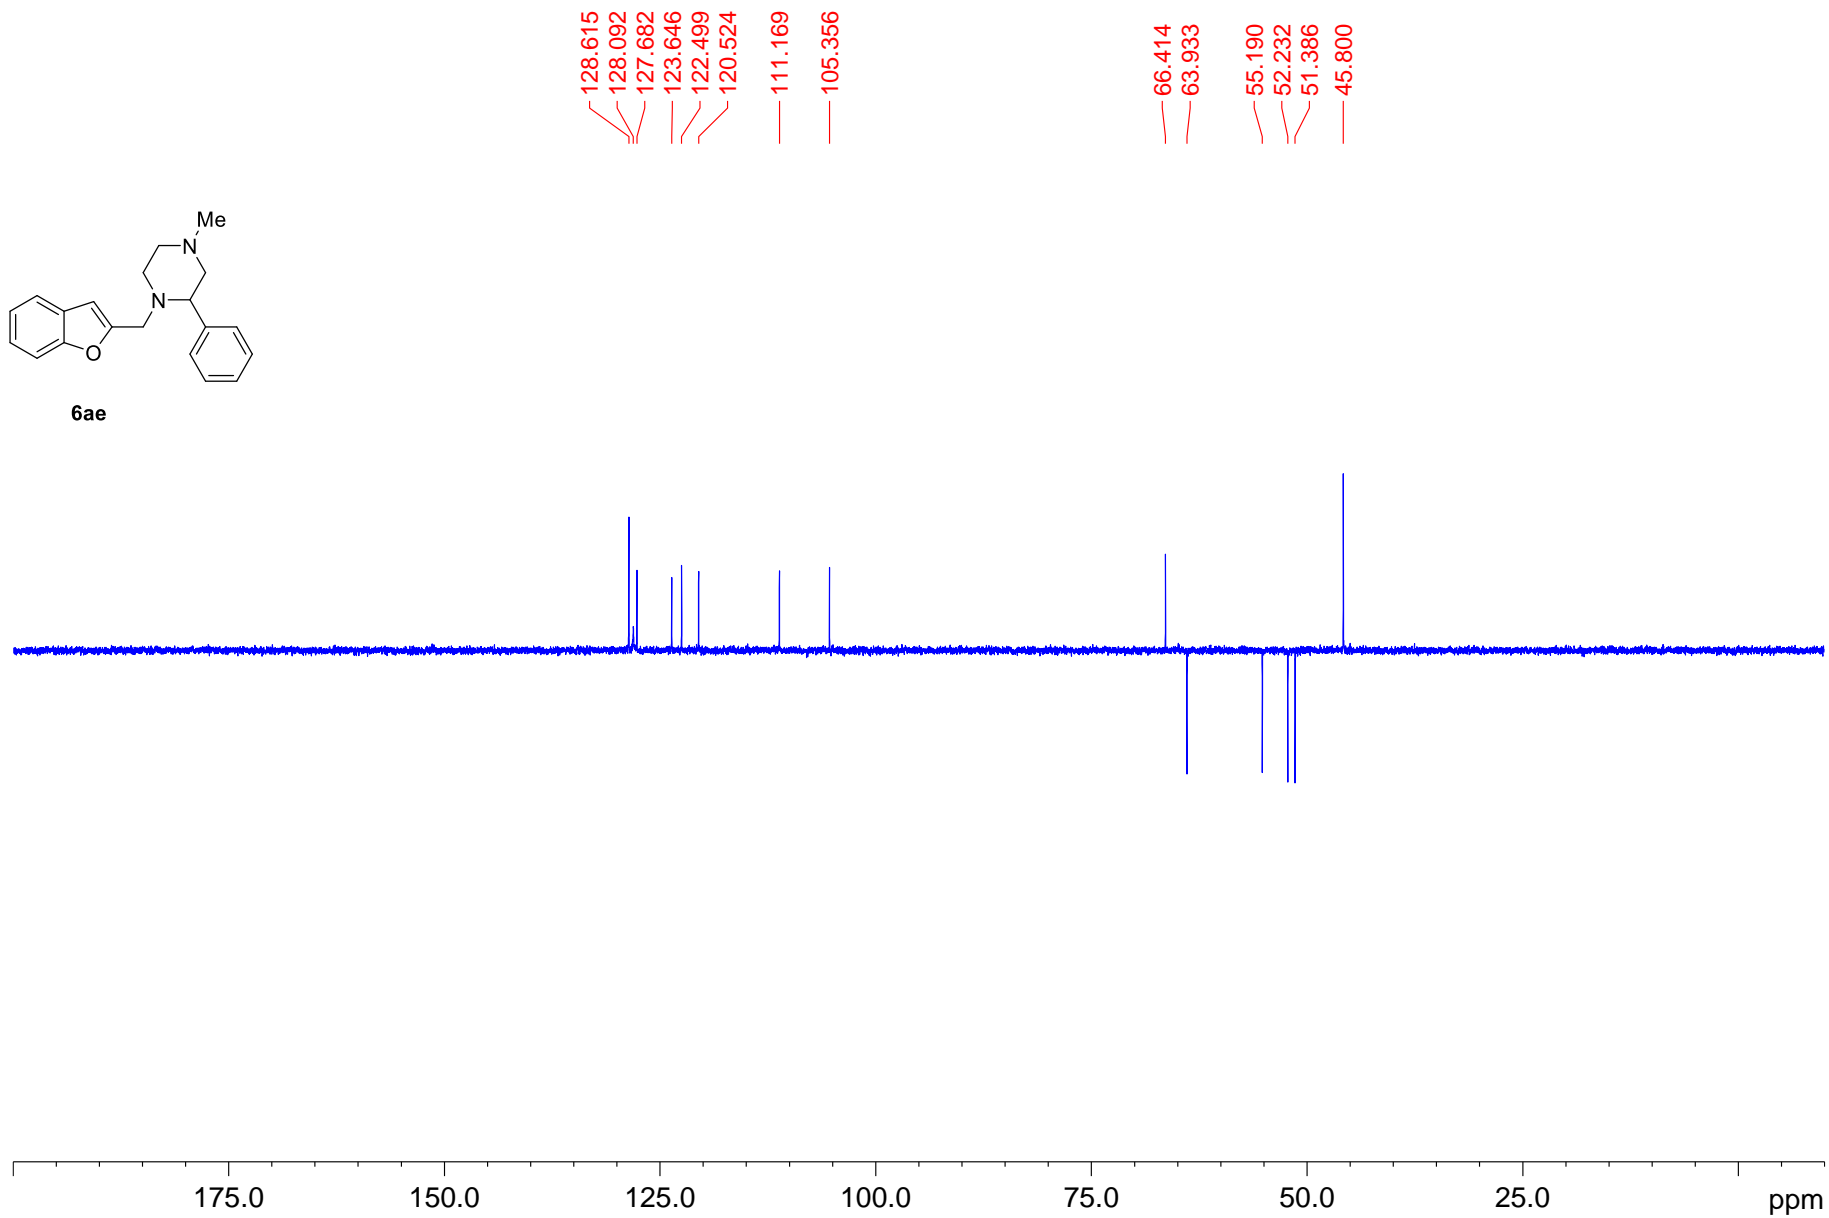

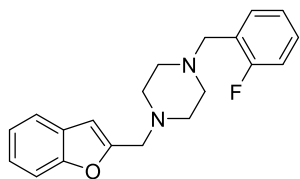

6af

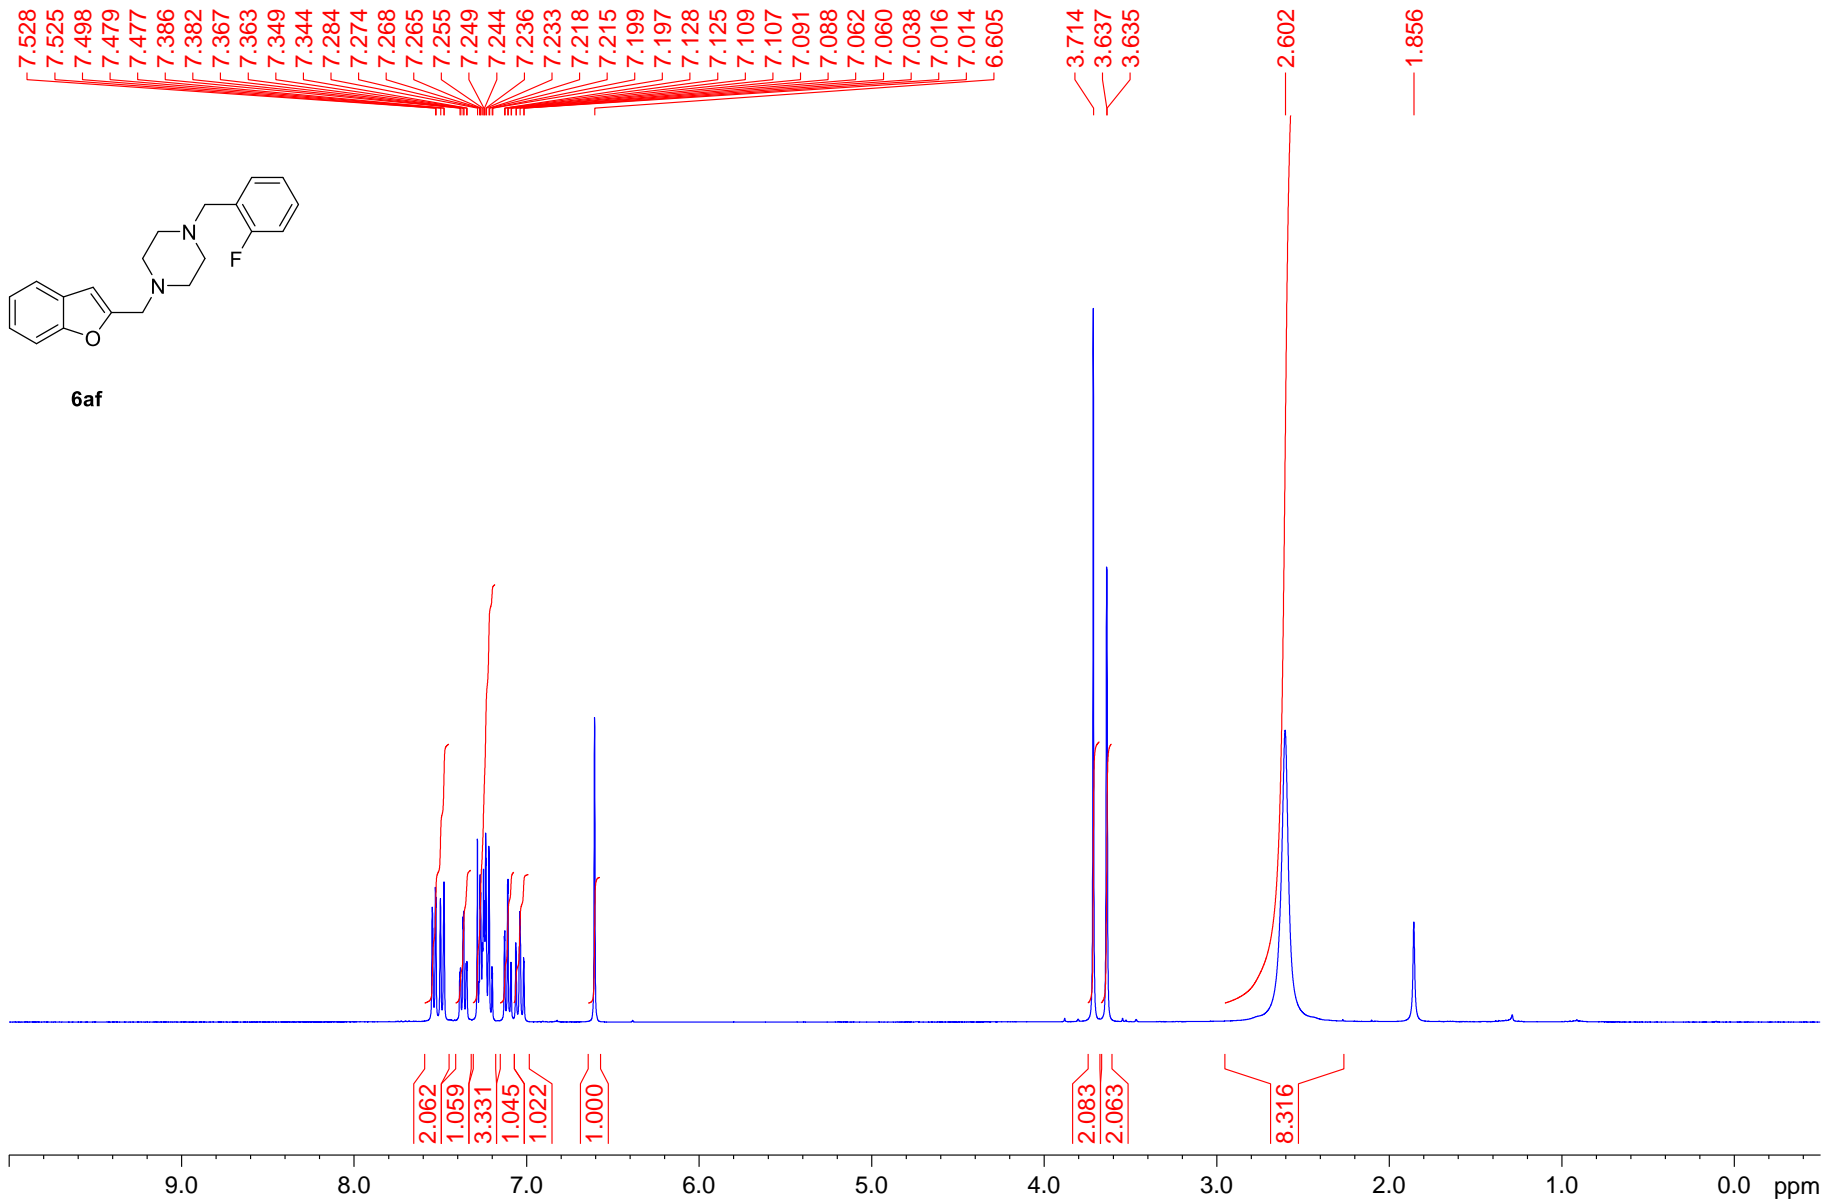

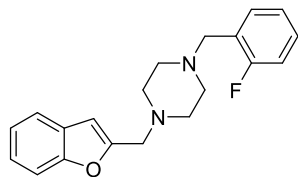

6af

162.672  
160.224  
155.111  
154.498  
131.669  
131.623  
128.810  
128.728  
128.296  
124.554  
124.407  
123.890  
123.803  
123.768  
122.619  
120.667  
115.366  
115.144  
111.314  
105.665

55.404  
55.167  
55.149  
53.017  
52.522

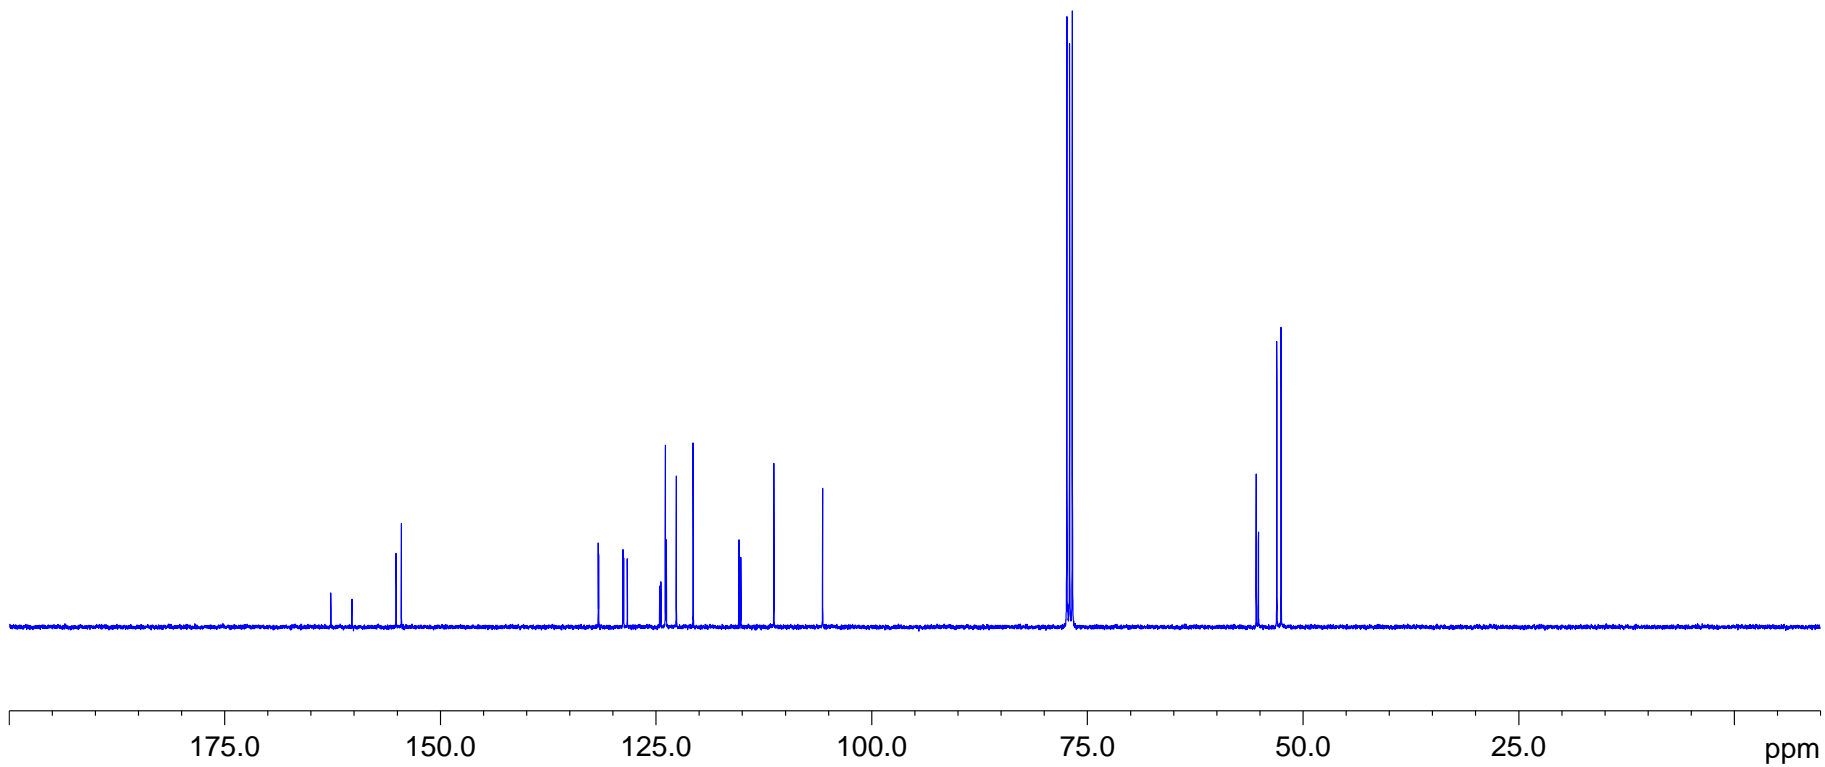



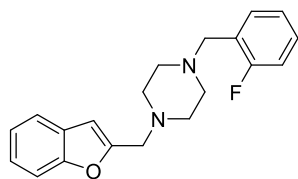

6af

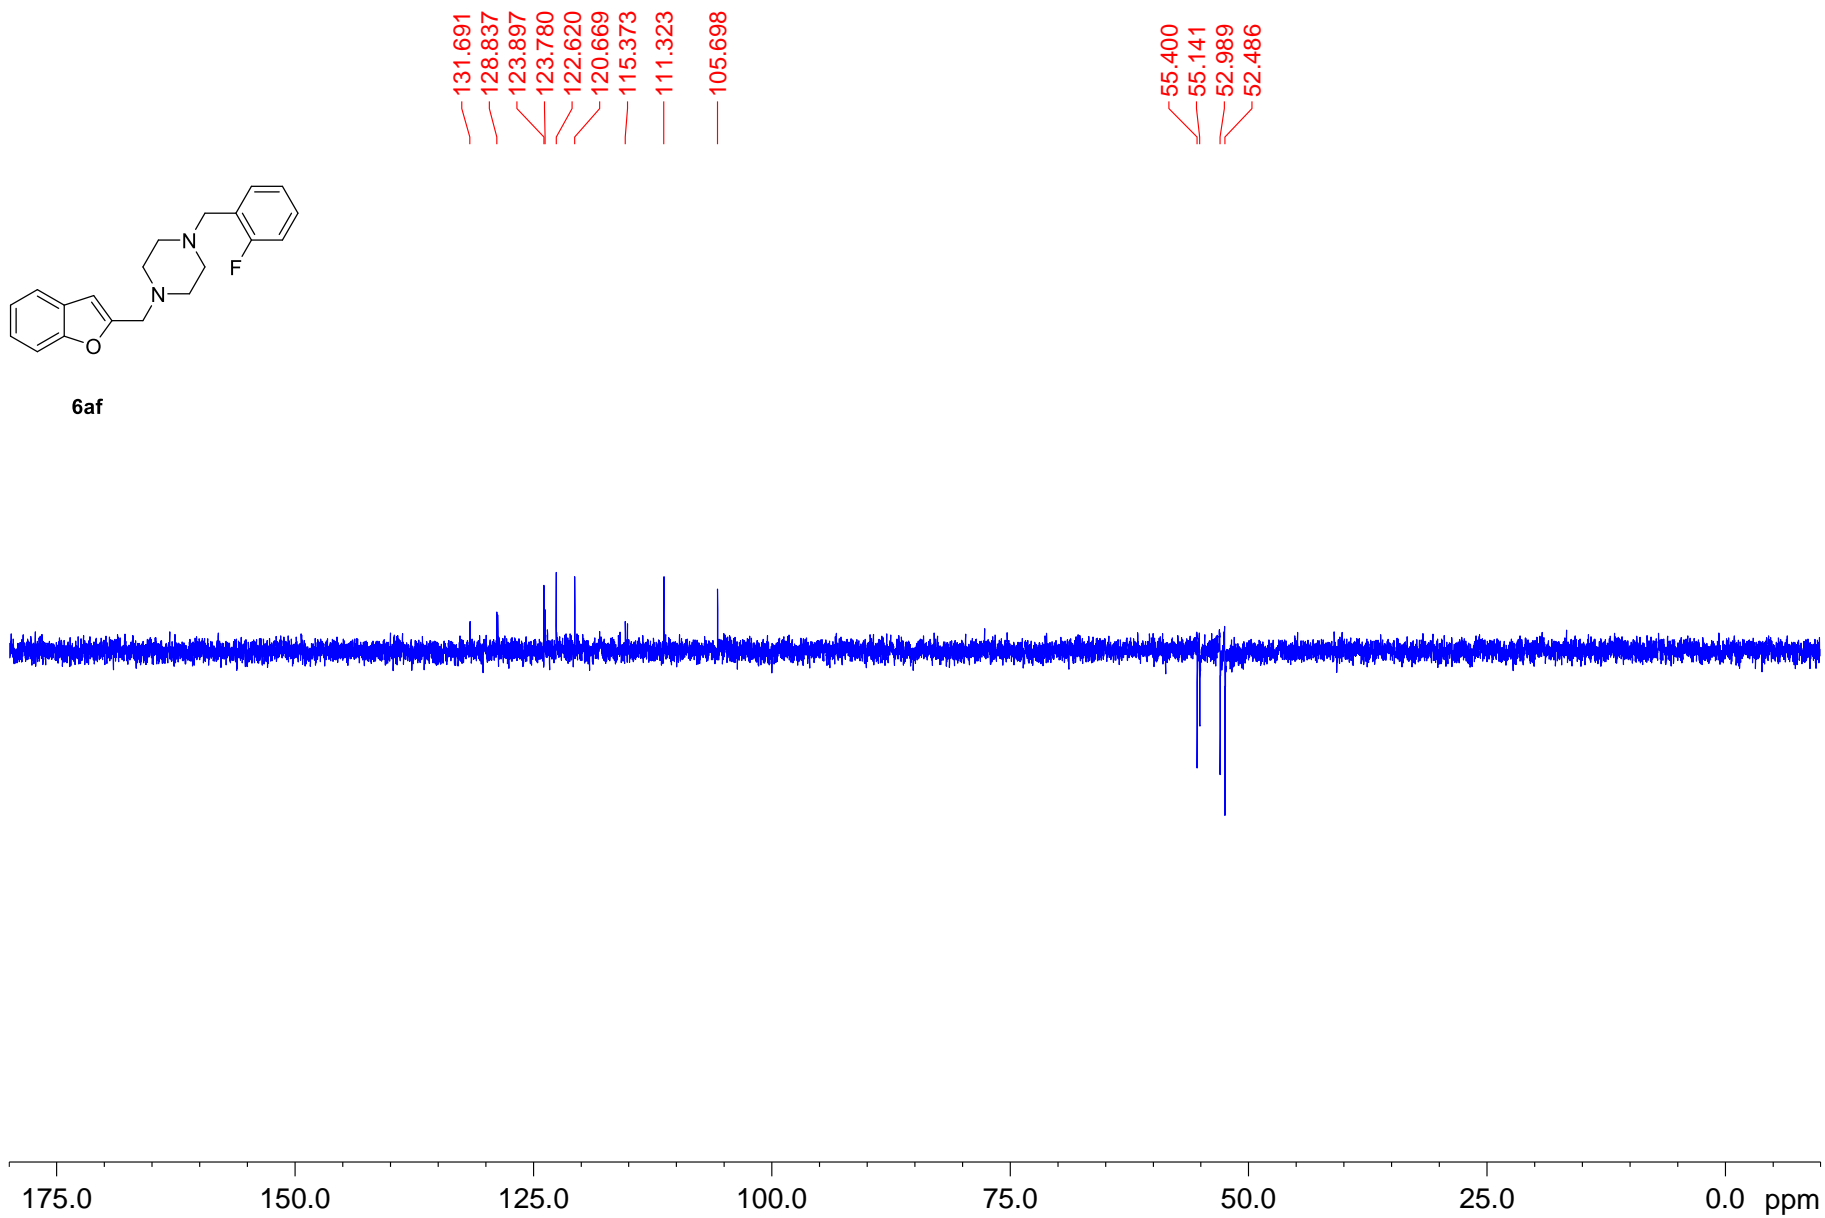

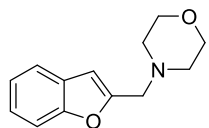

6ag

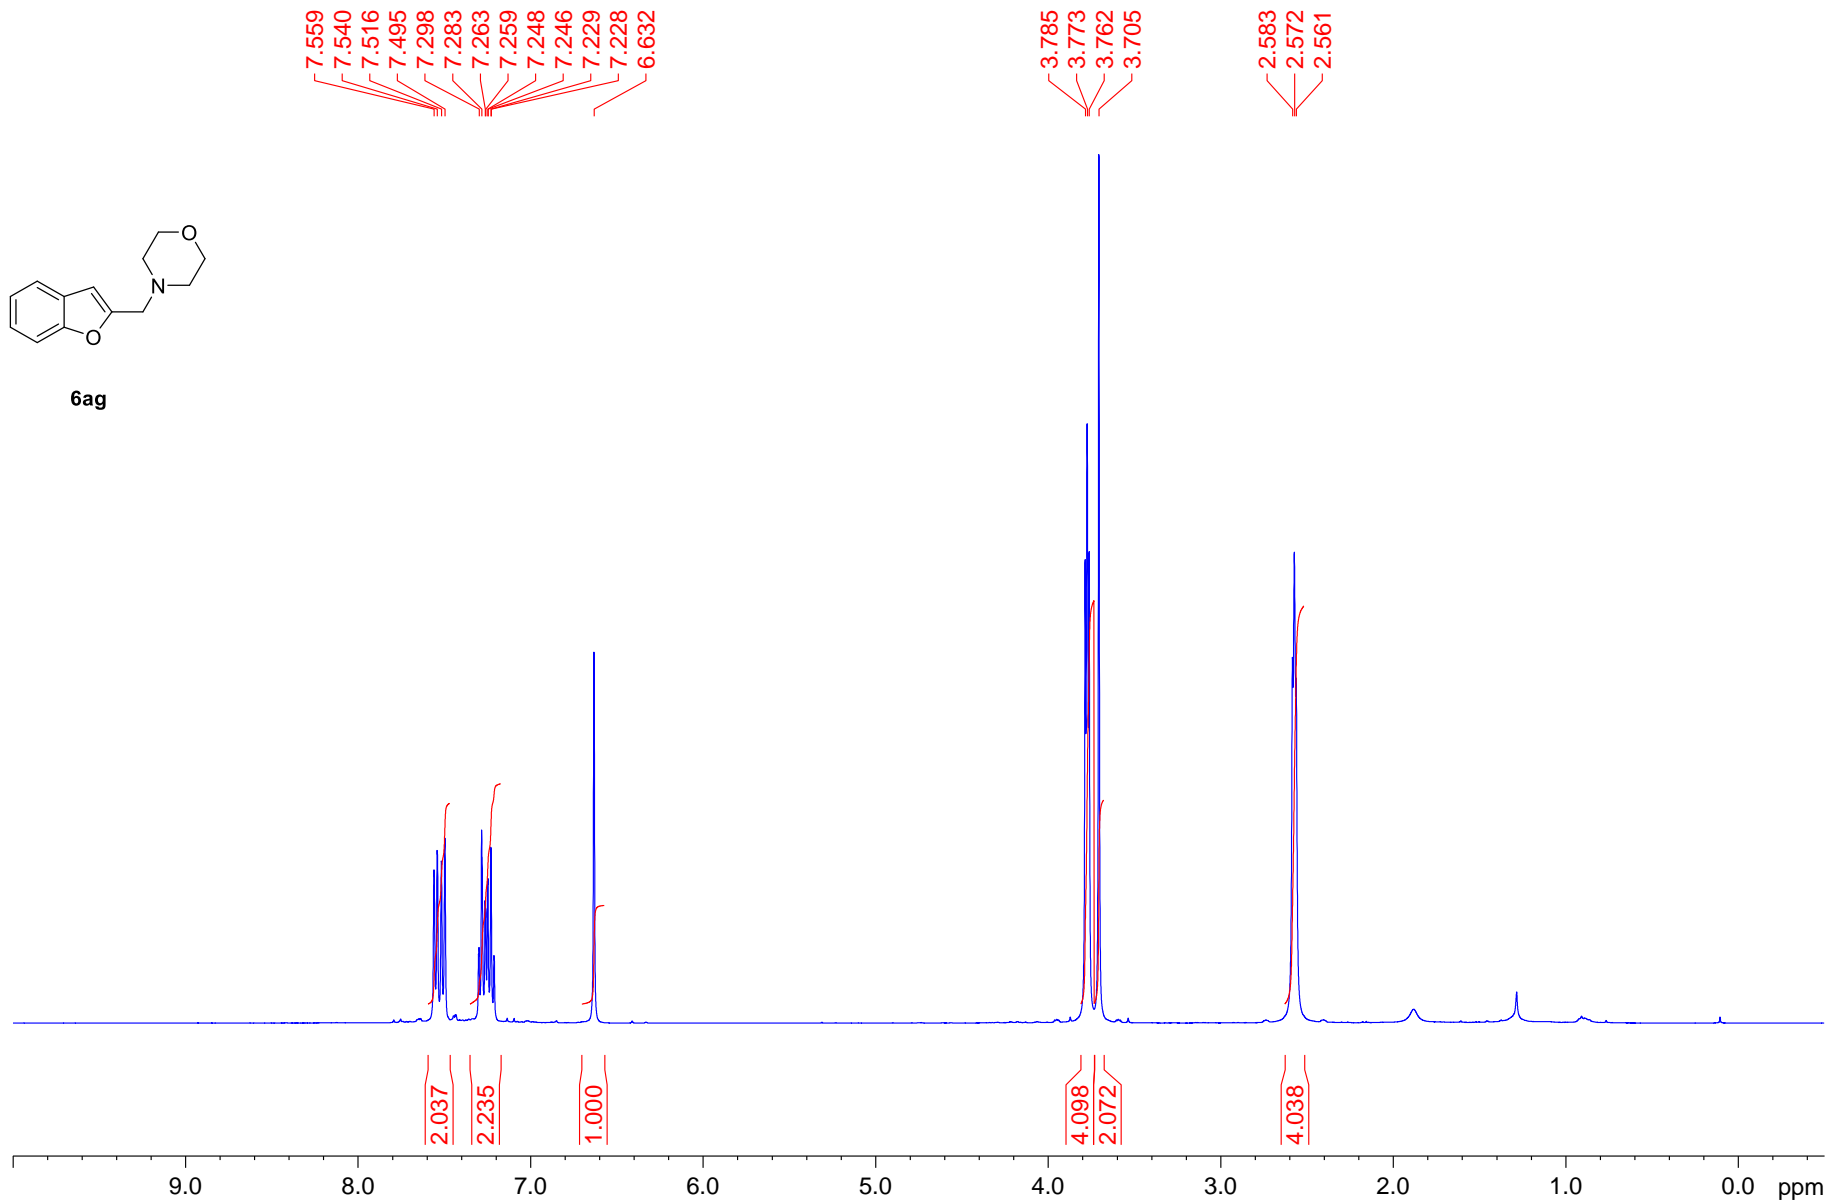

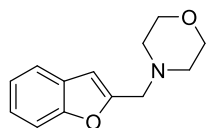

6ag

155.149  
154.027

128.206  
124.043  
122.720  
120.737

111.328  
105.906

66.838

55.868  
53.513





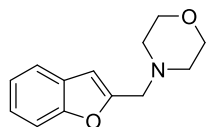

6ag

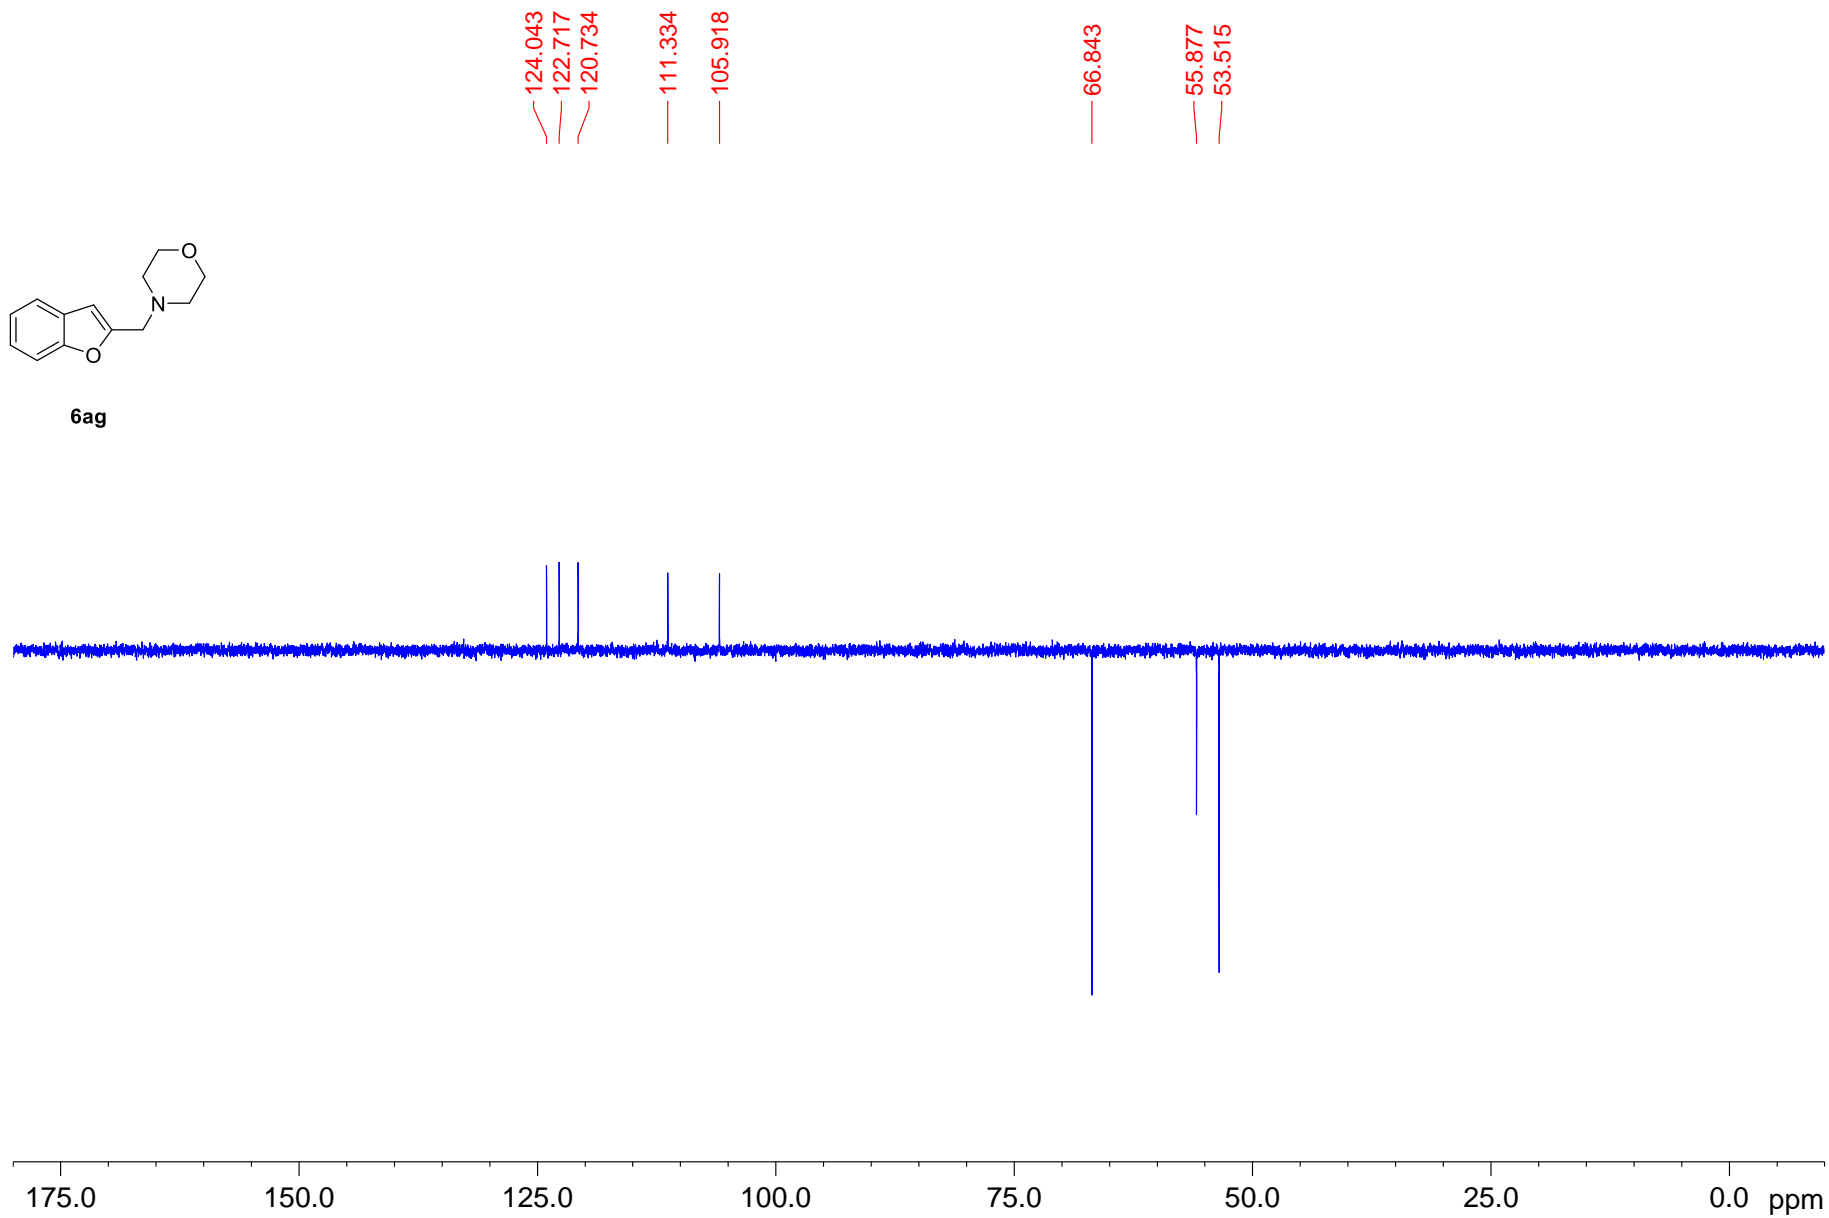

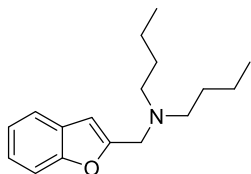

6ah

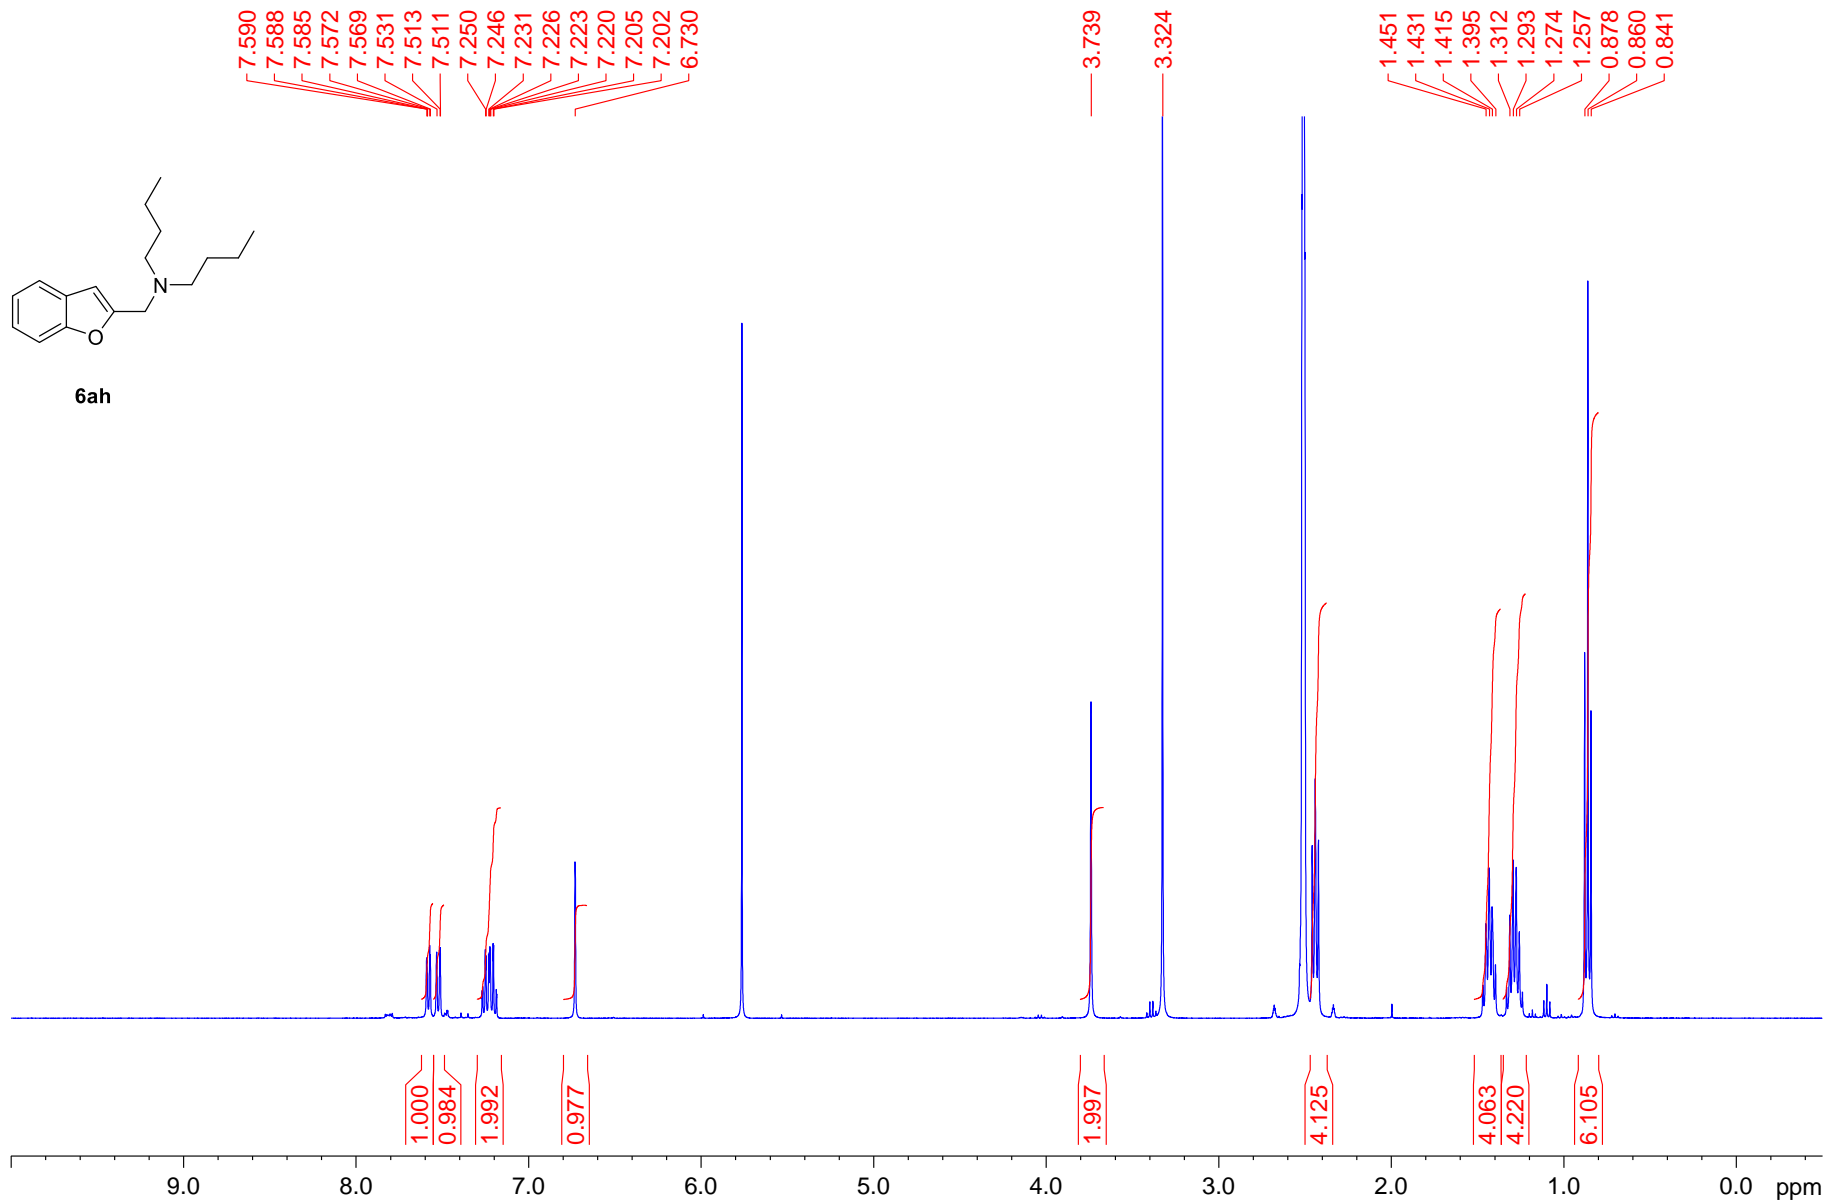



6ah

156.870  
154.719

128.585  
124.138  
123.074  
121.159

111.333  
105.223

53.470  
50.548

29.390

20.395

14.339

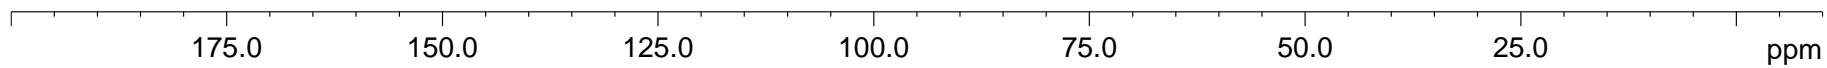

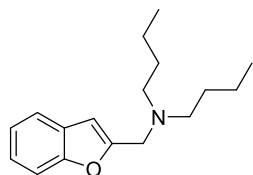

6ah

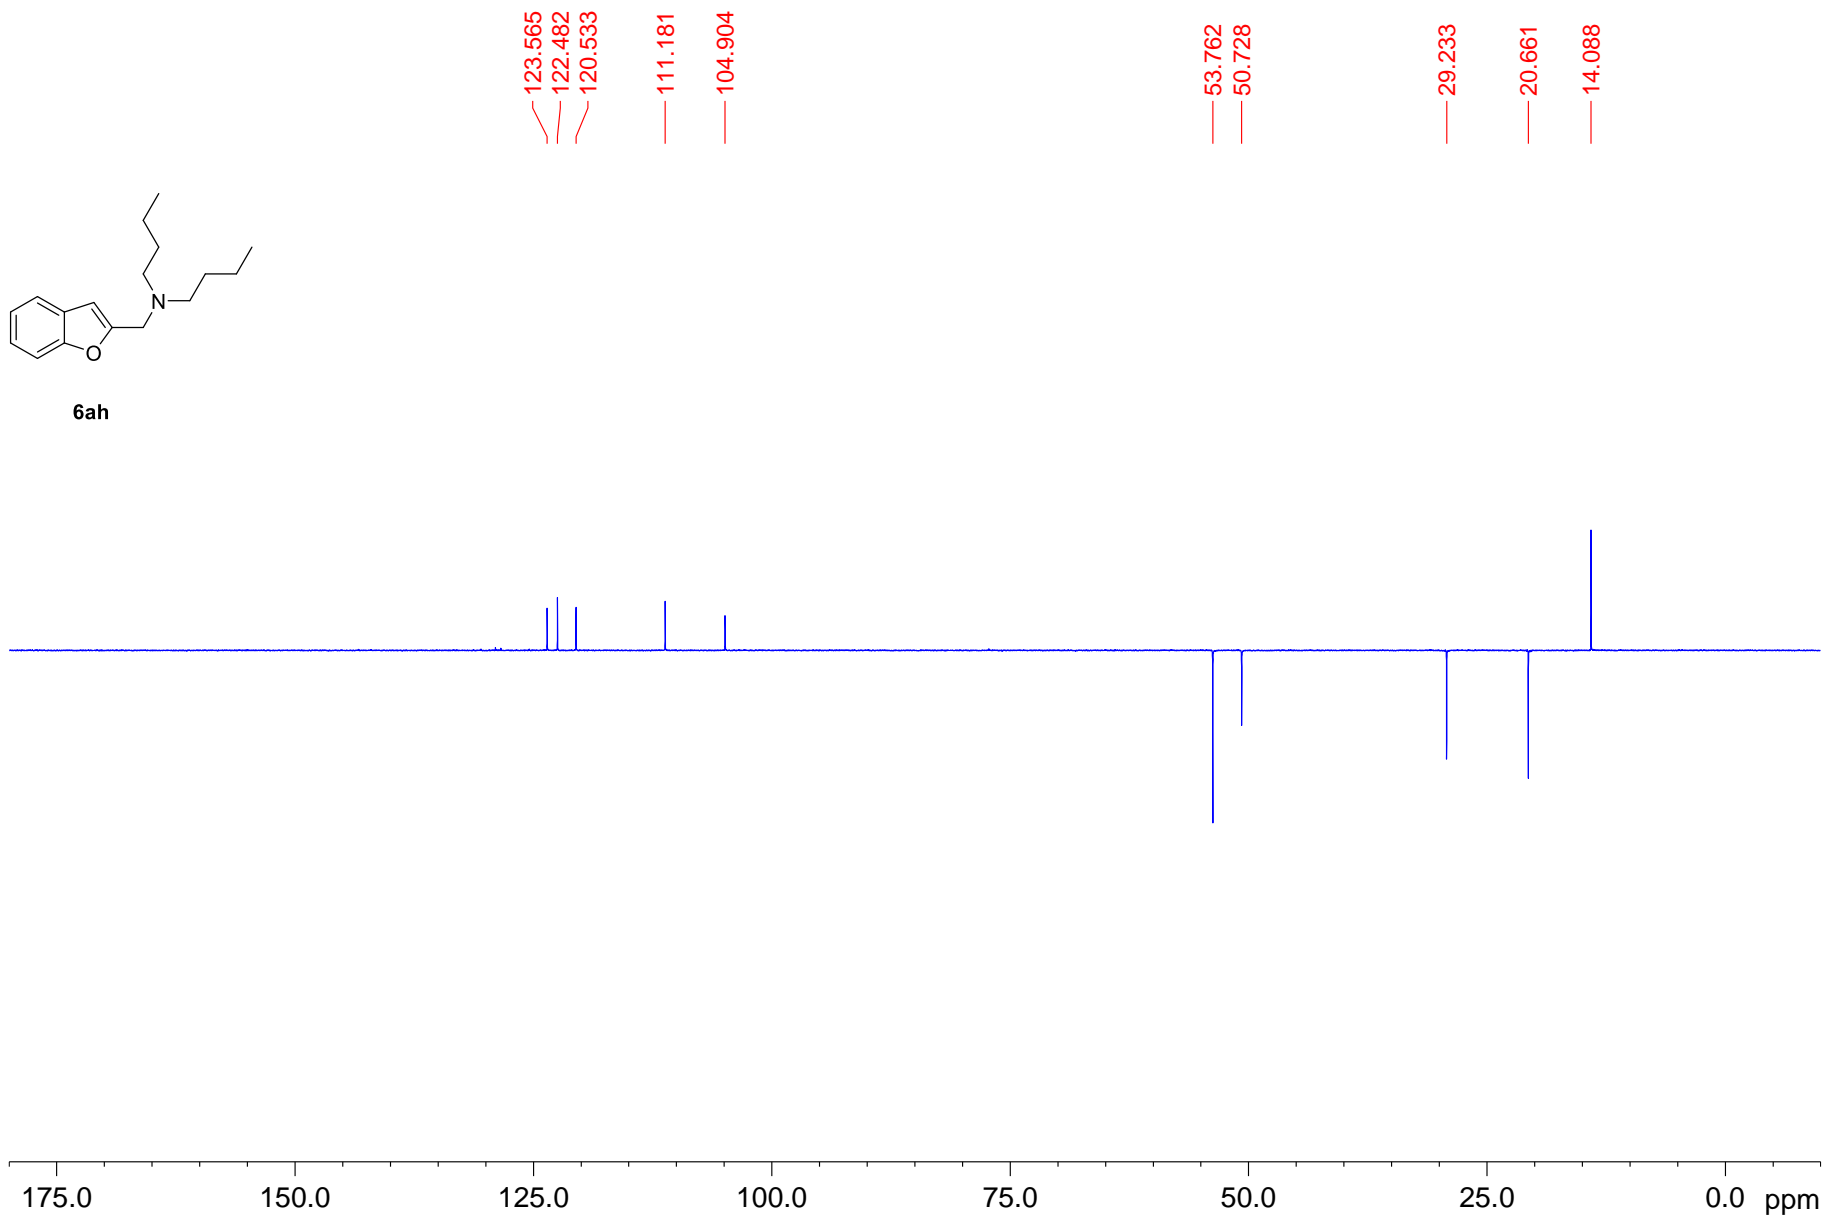

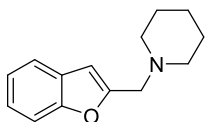

6ai

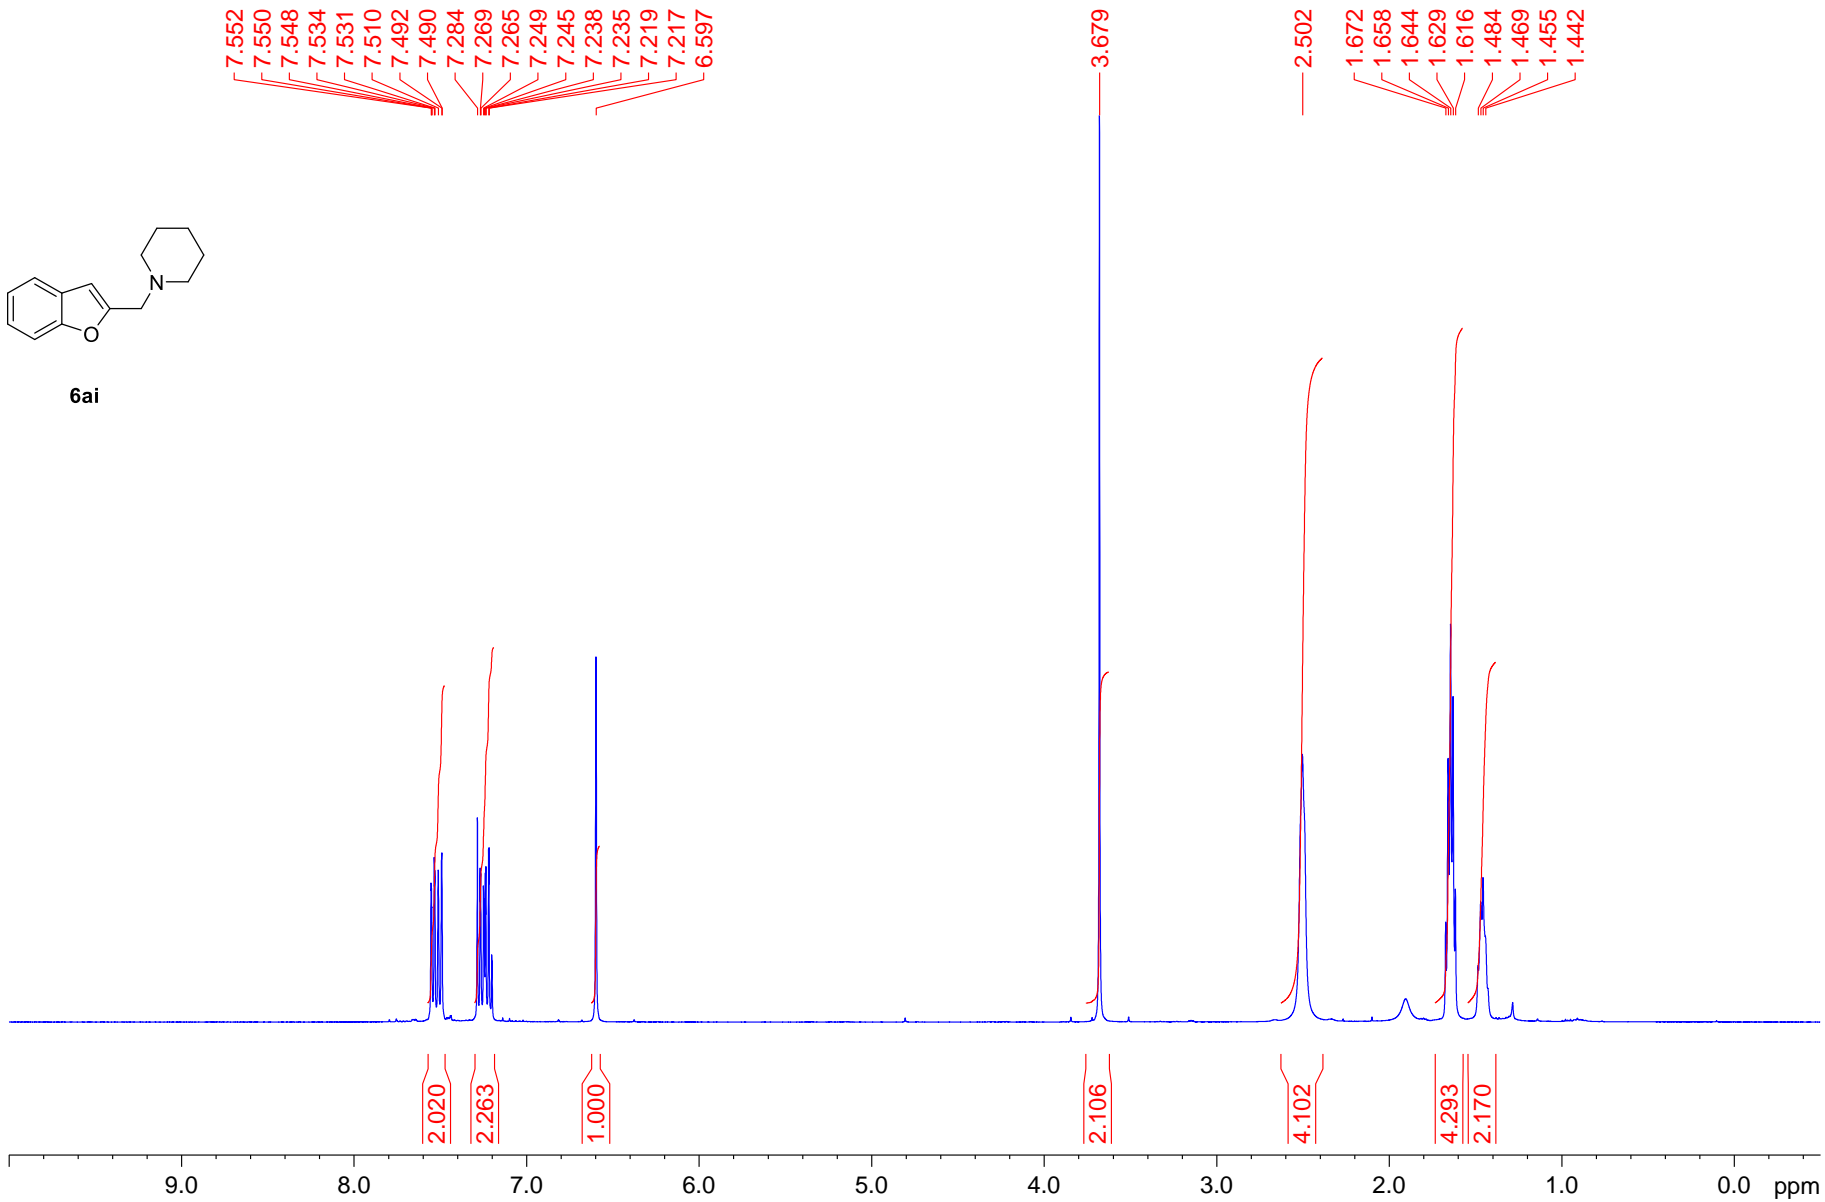

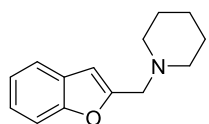

6ai

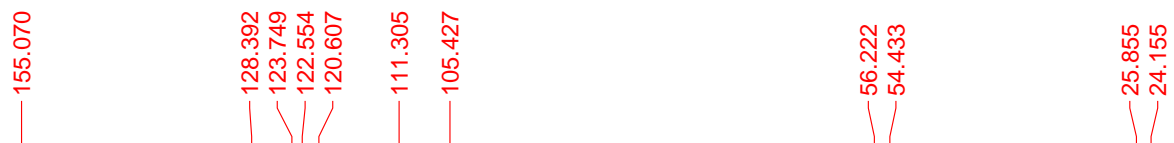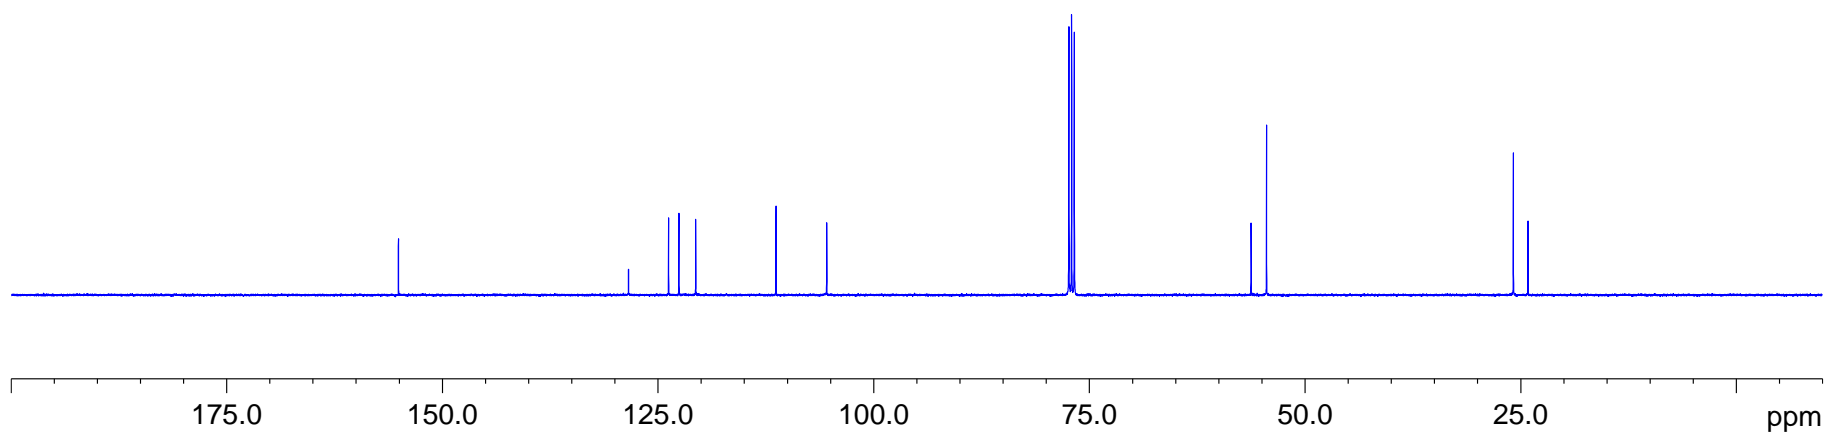

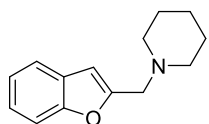

6ai

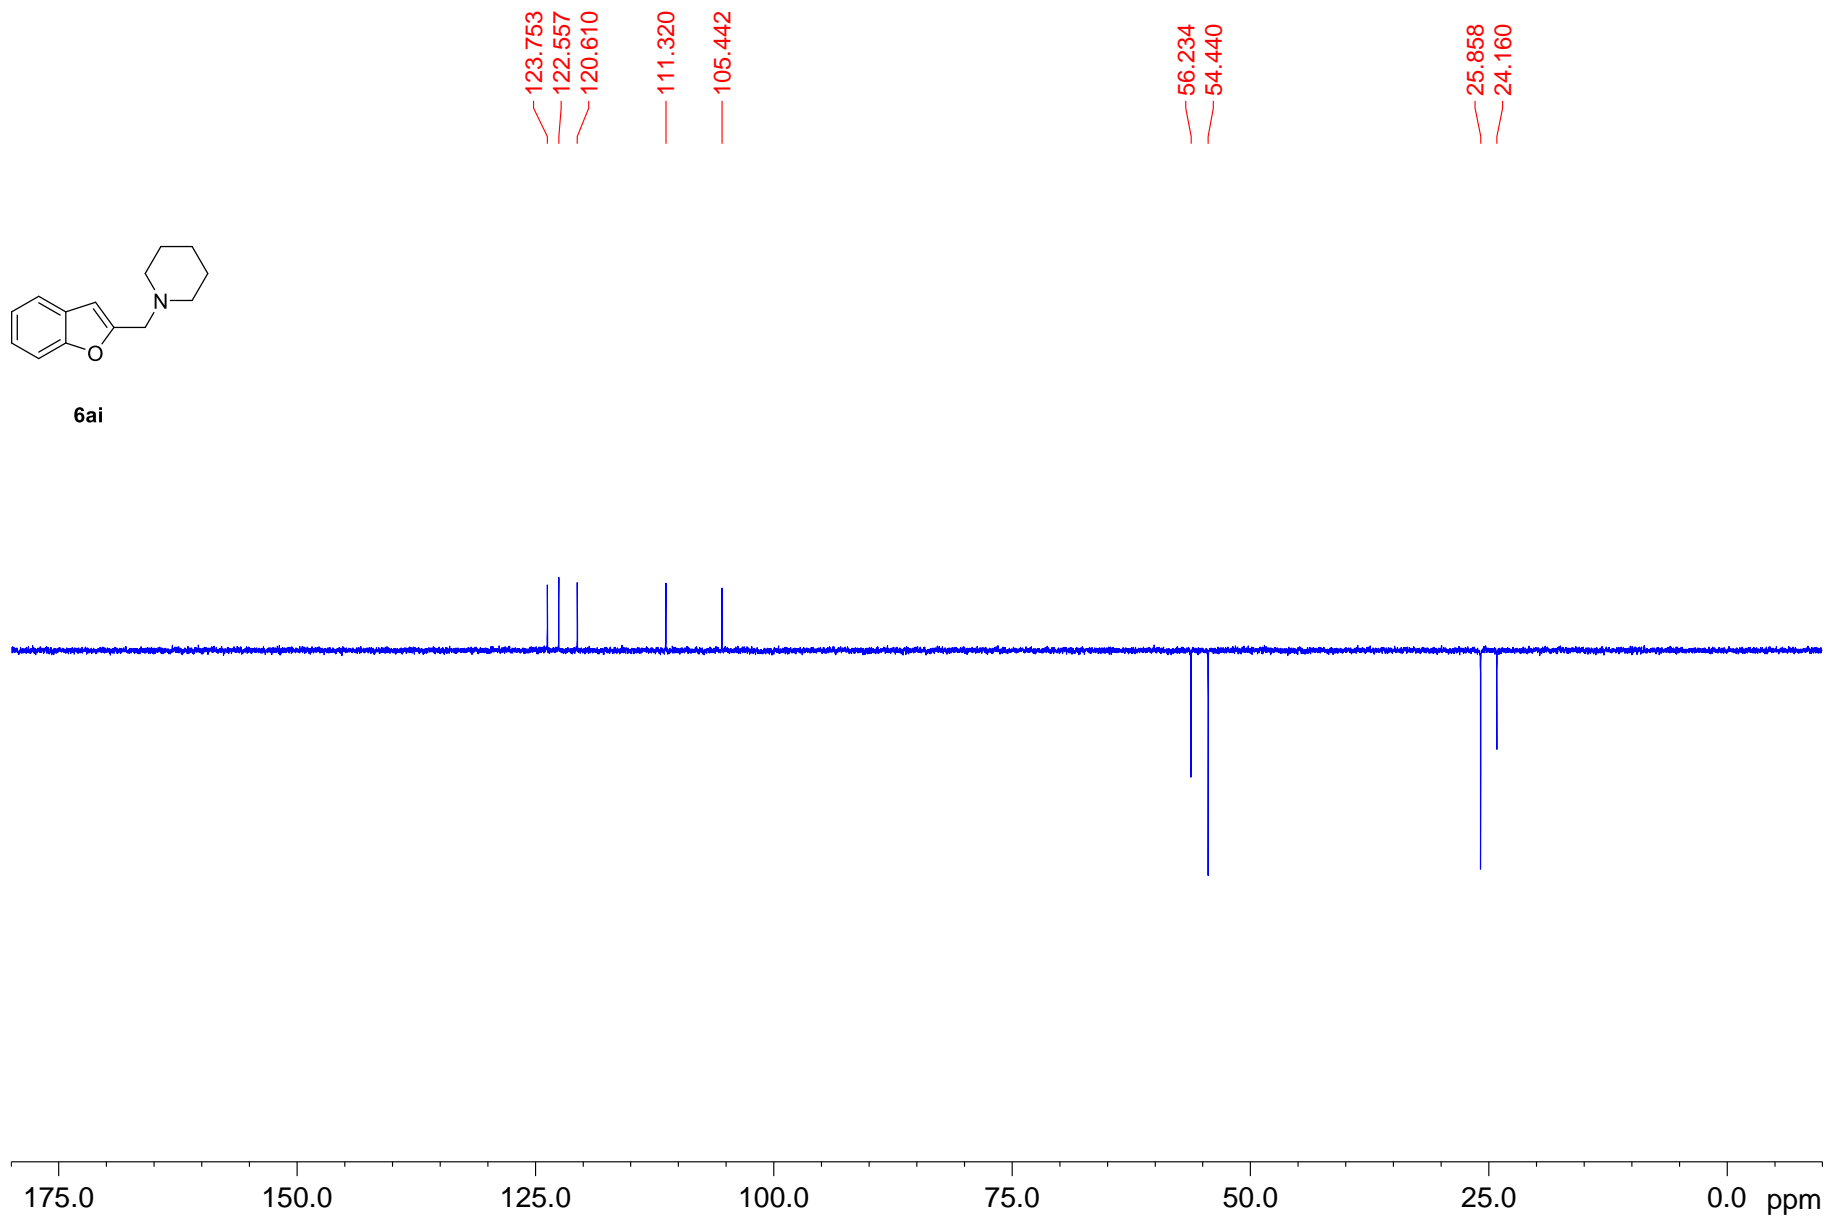

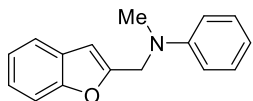

6aj

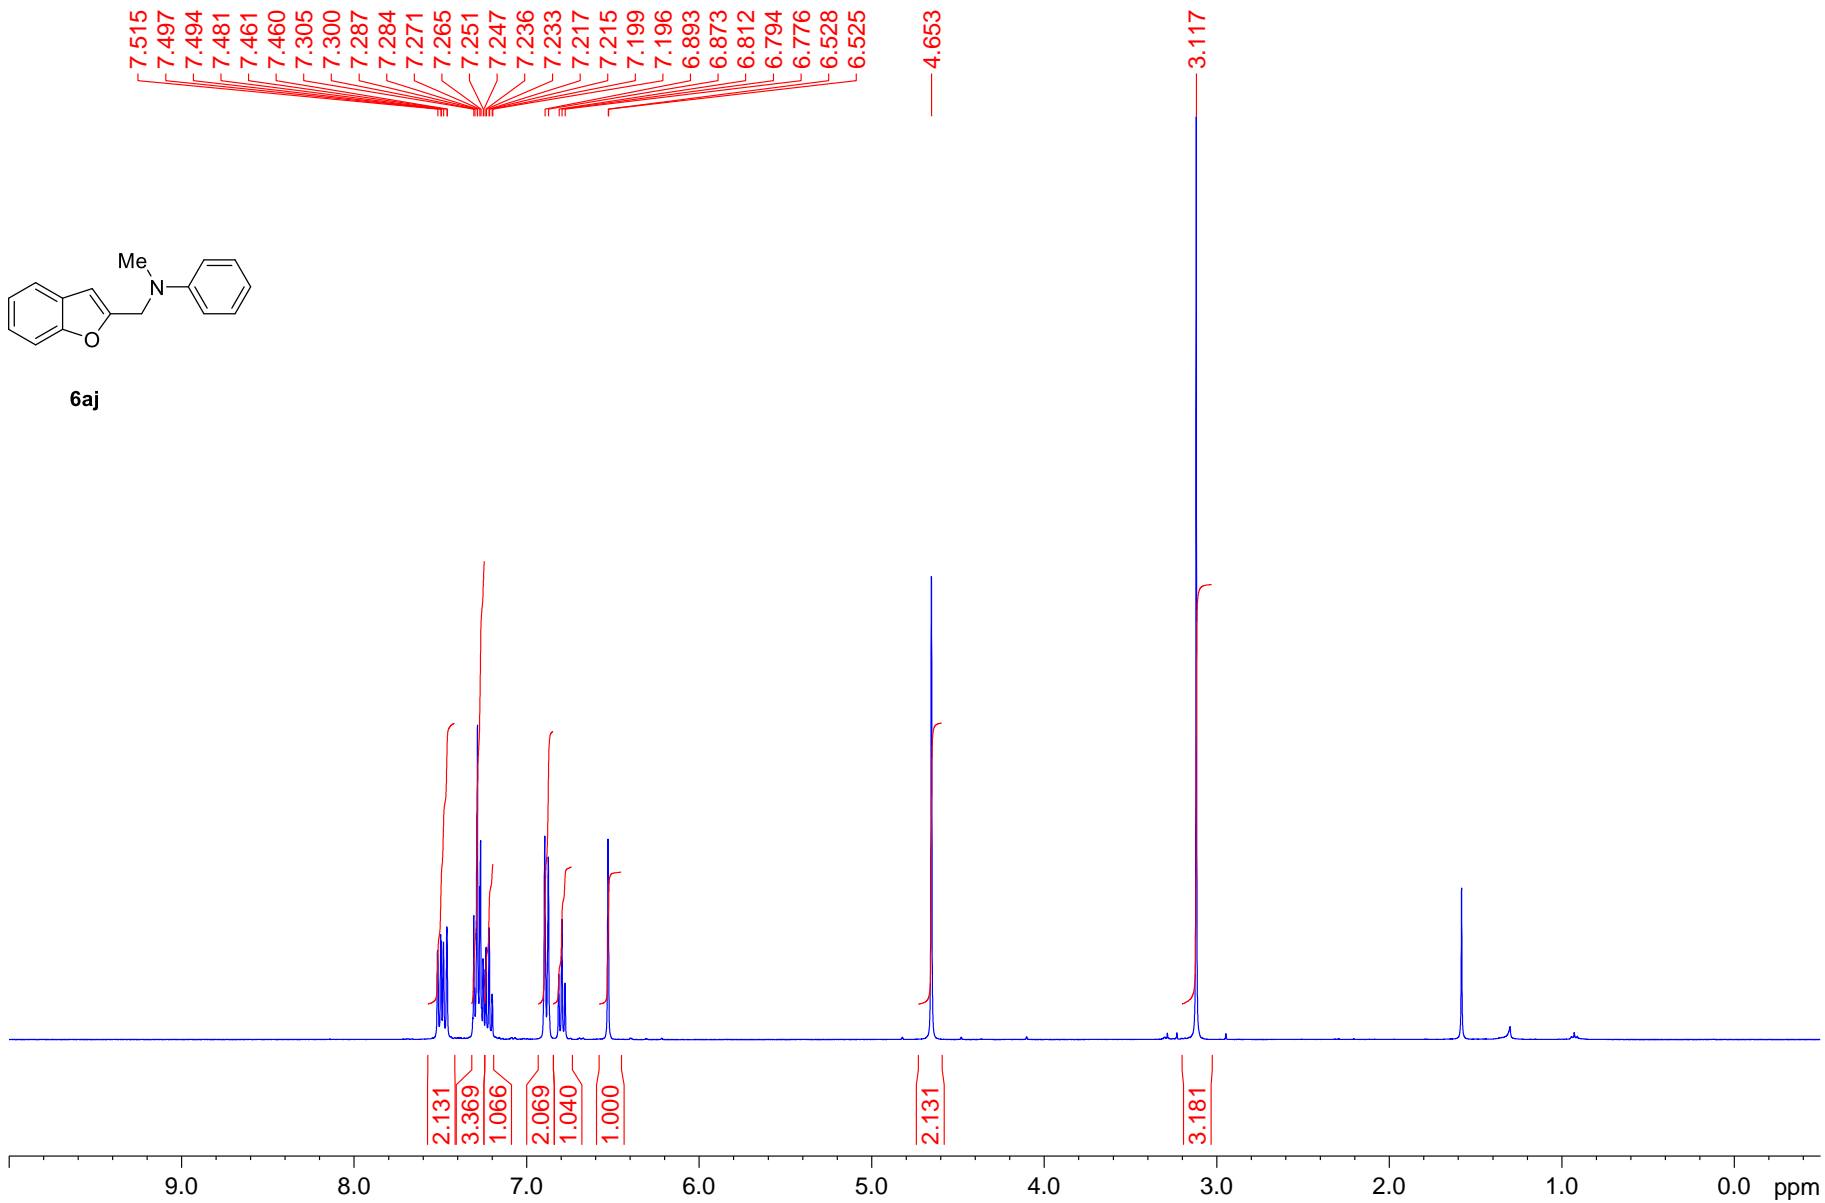



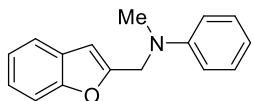

6aj

155.185  
154.960  
149.155

129.200  
128.433  
123.758  
123.524  
122.672  
120.684  
117.305  
112.940  
111.085  
103.918

50.515

38.669

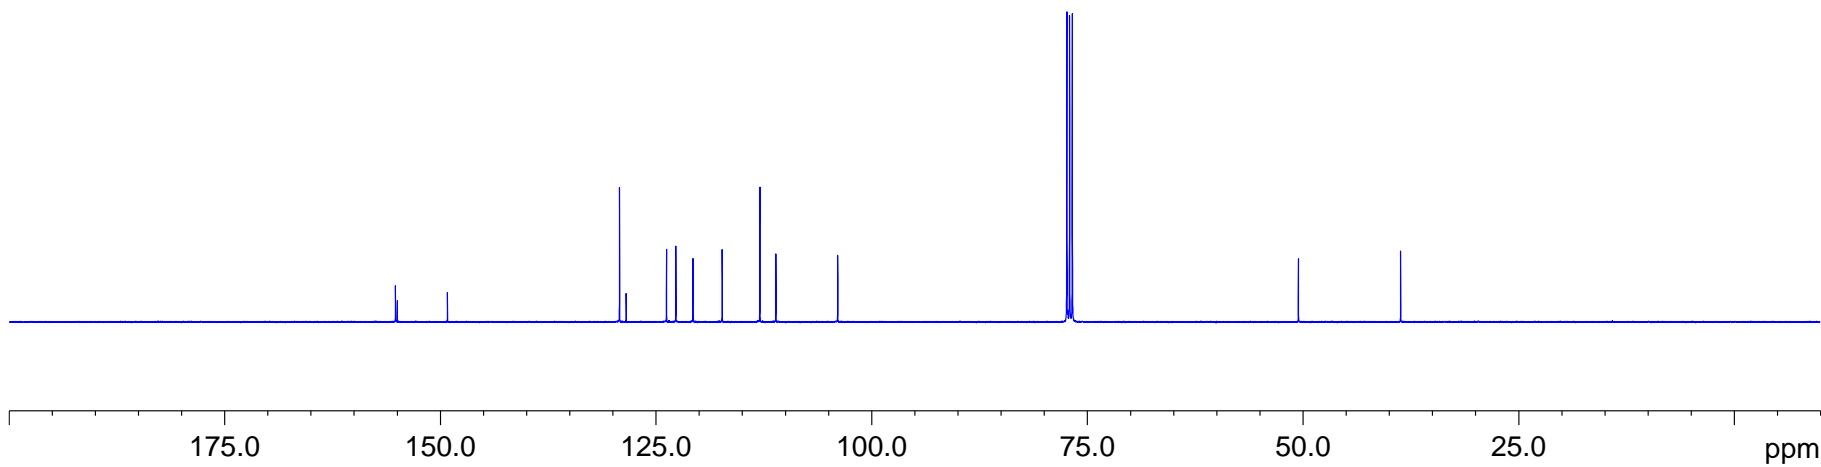

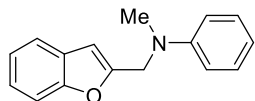

6aj

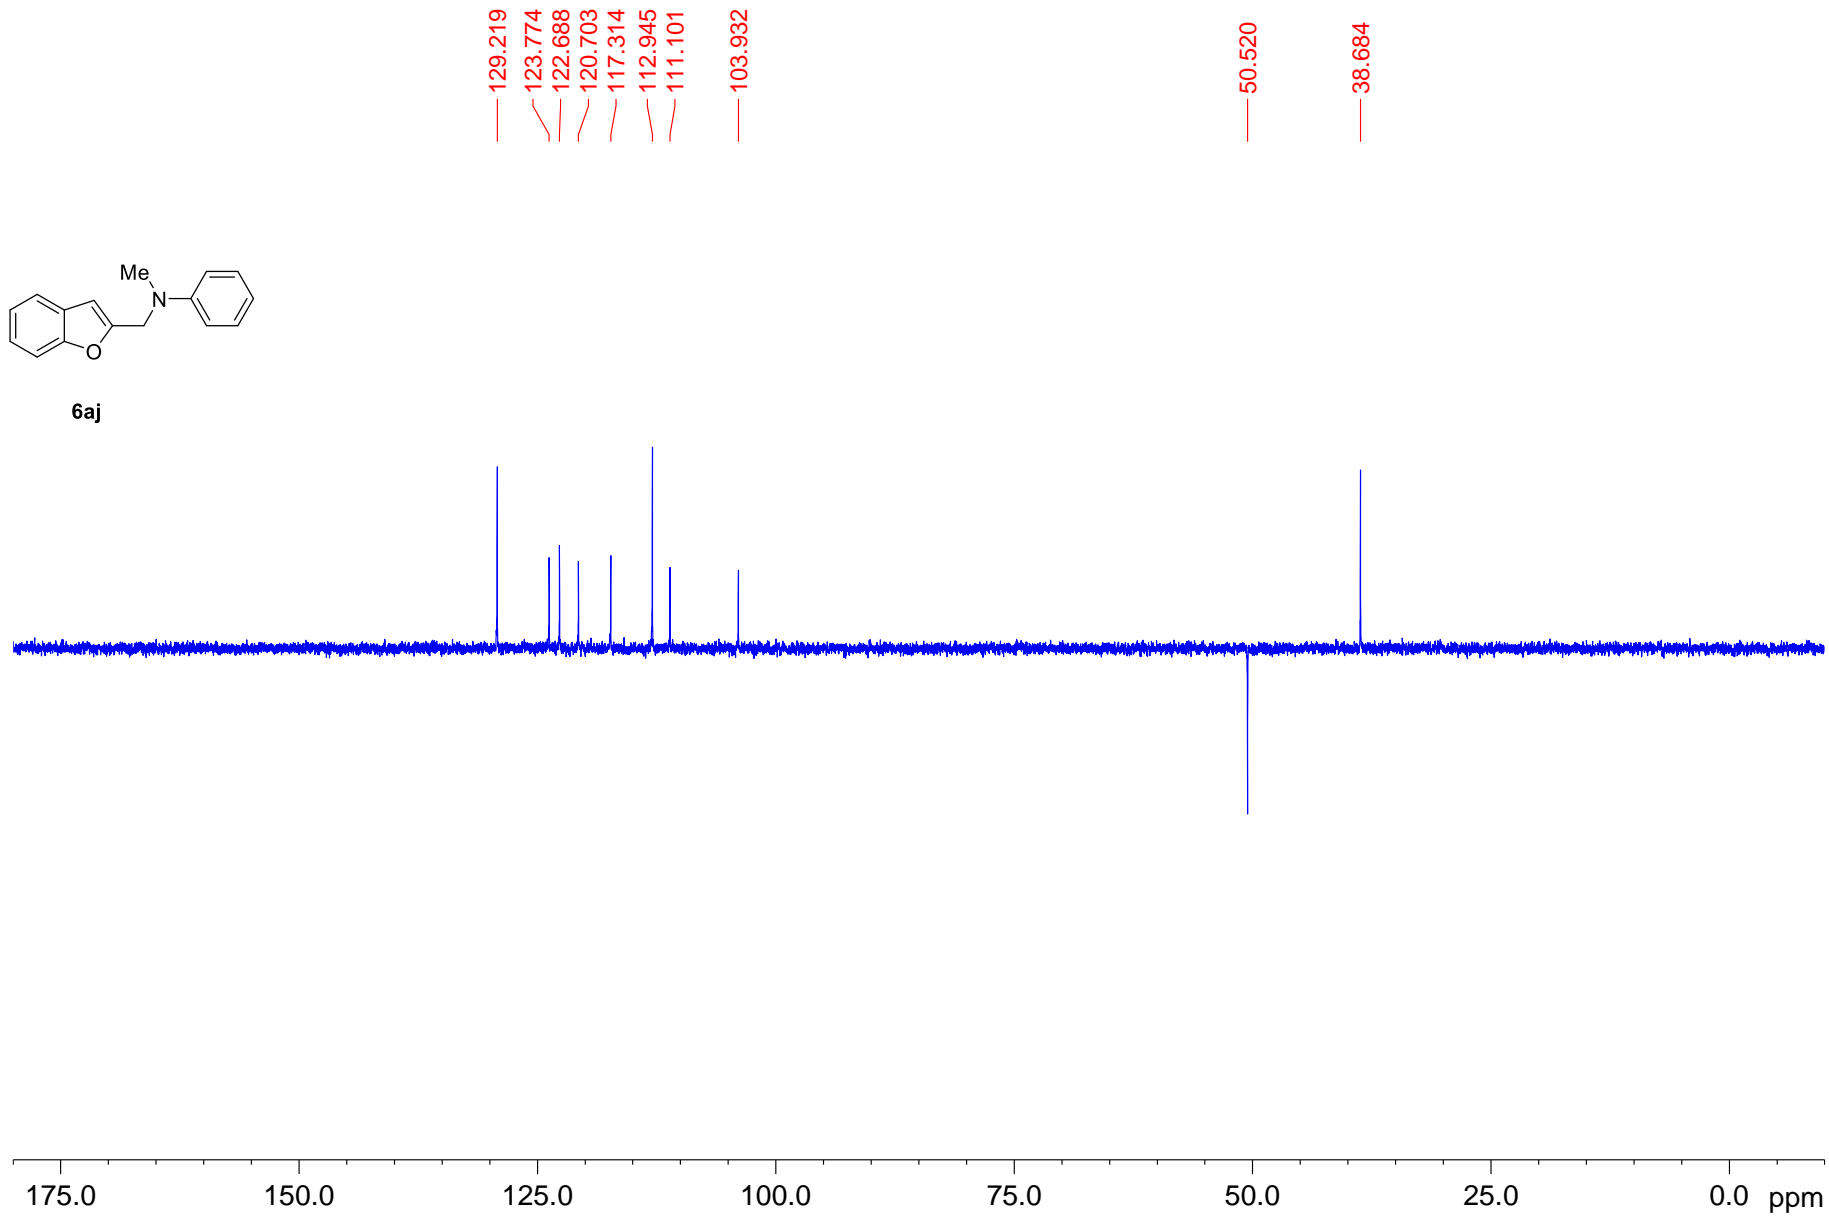

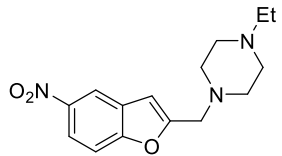

**ba**

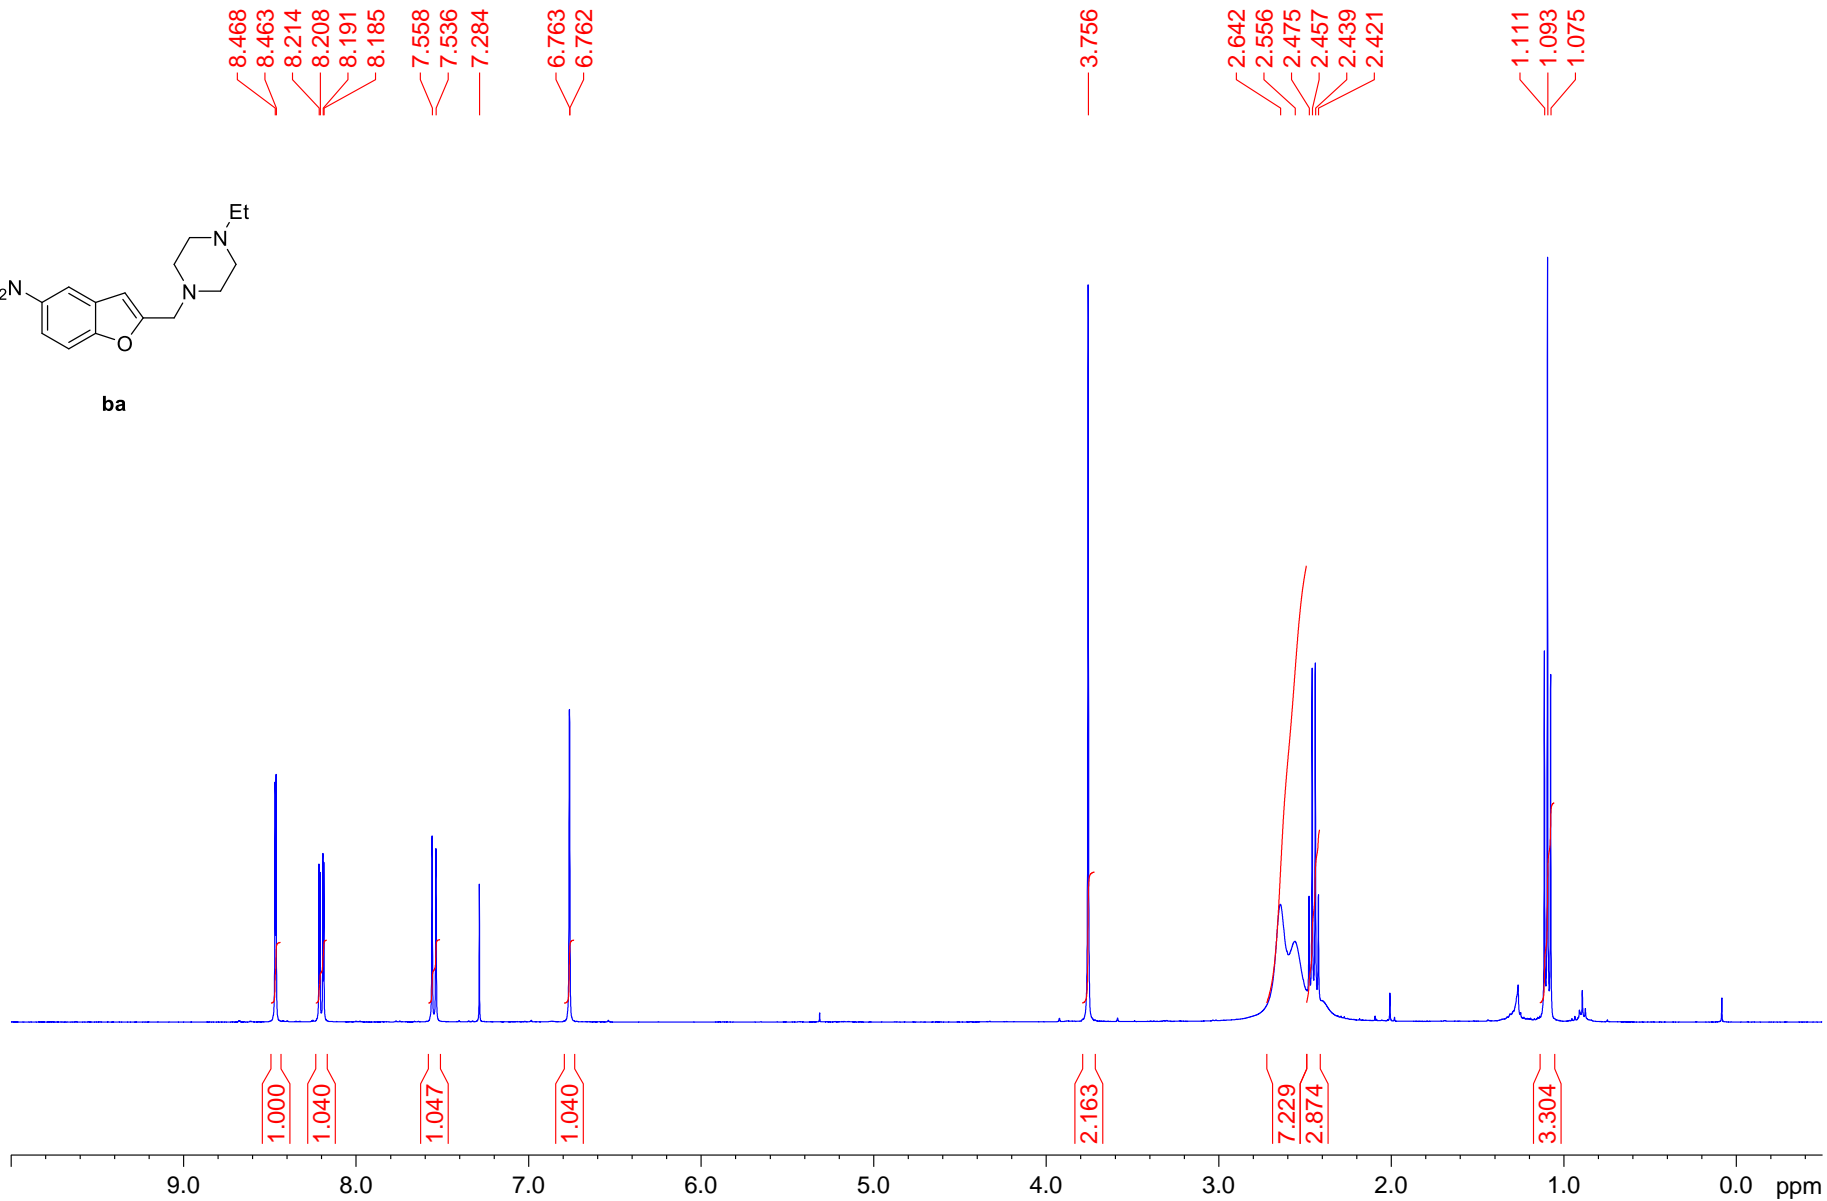

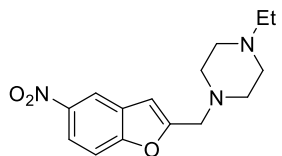

**ba**

158.290  
157.896

144.102

128.686

119.917

117.231

111.582

106.313

55.233

53.056

52.517

52.204

11.925

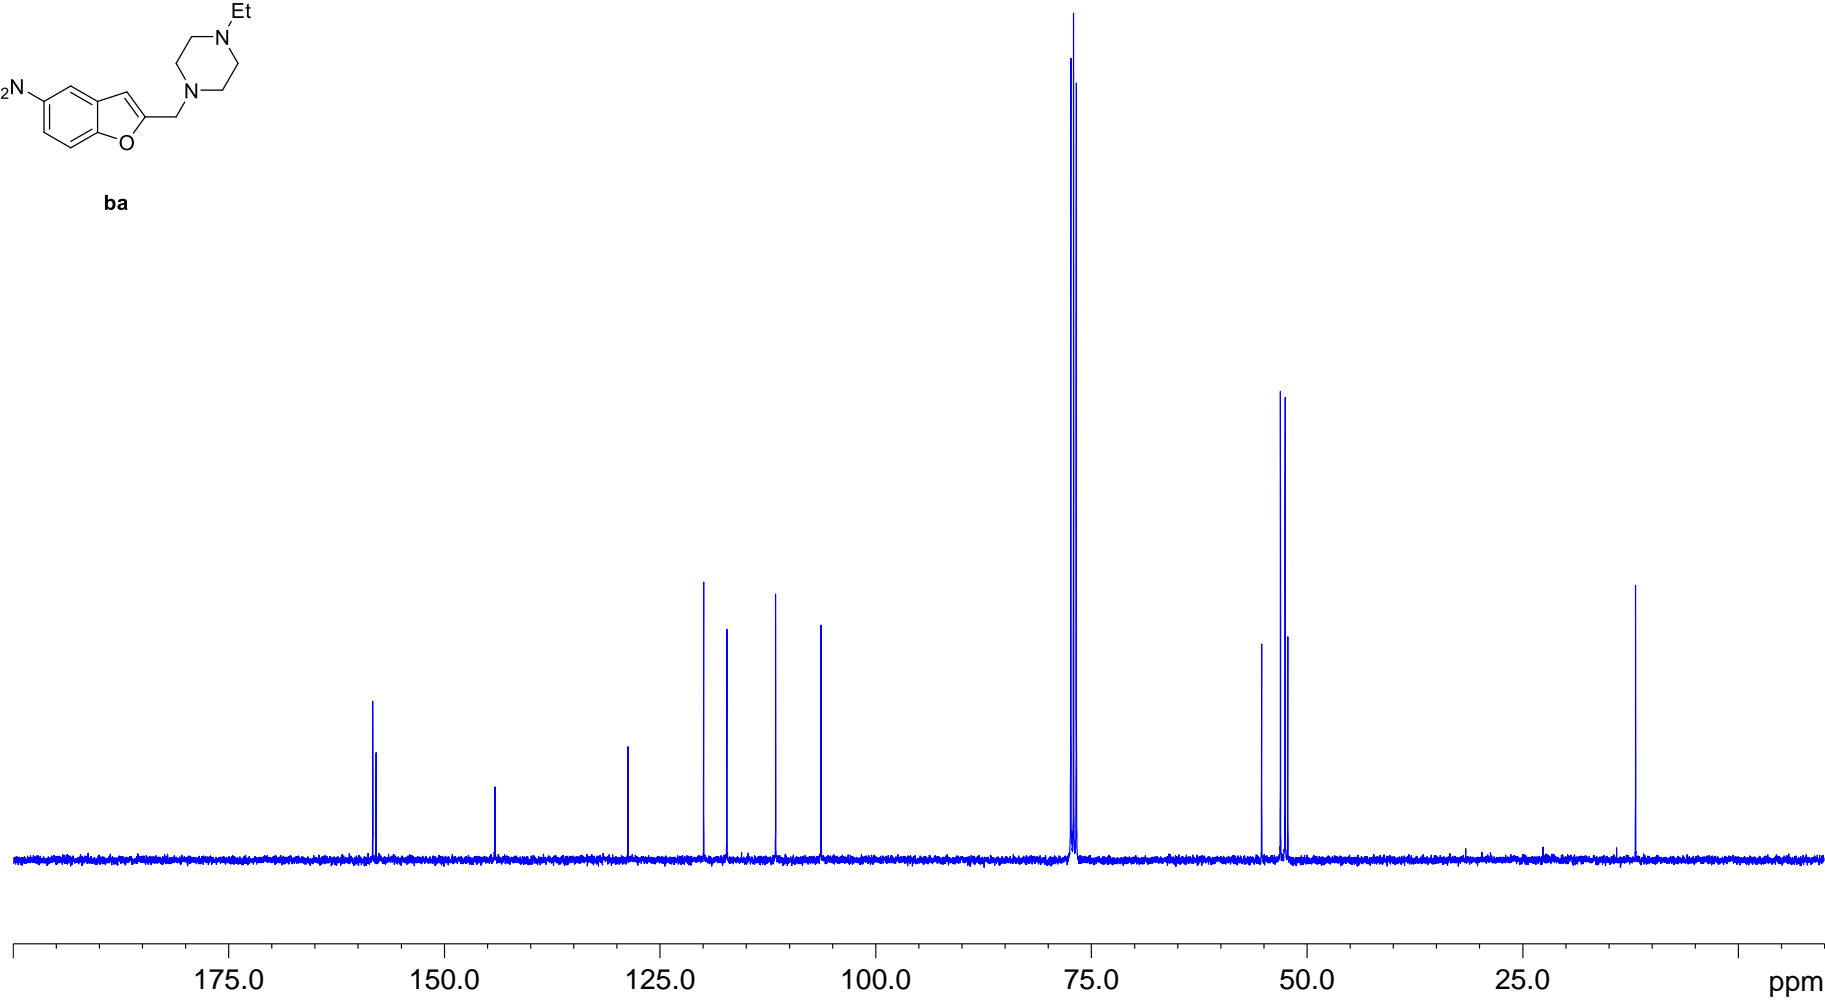

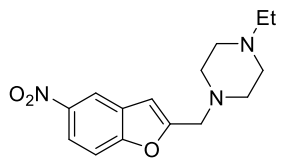

**ba**

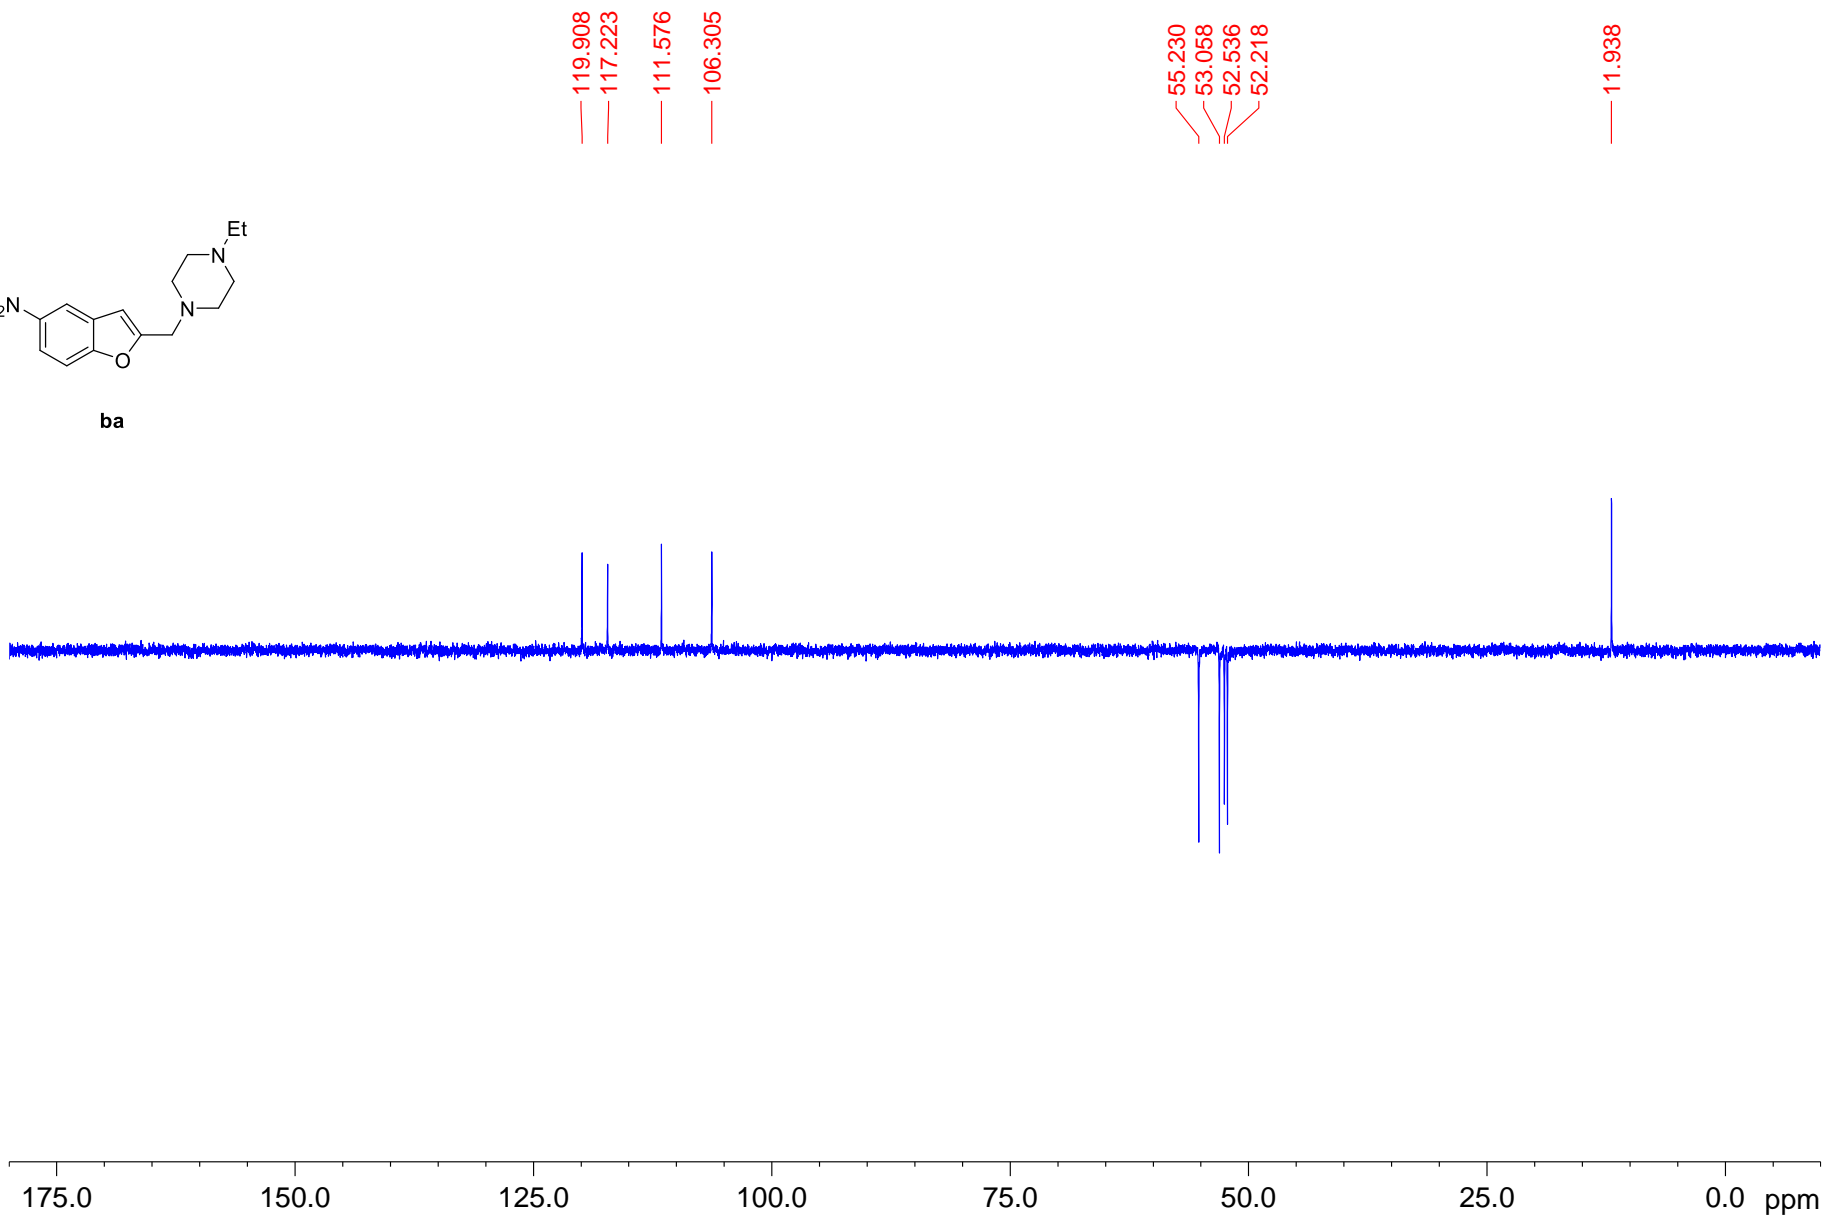

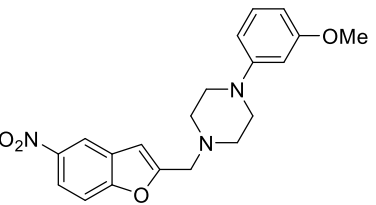

**6bk**

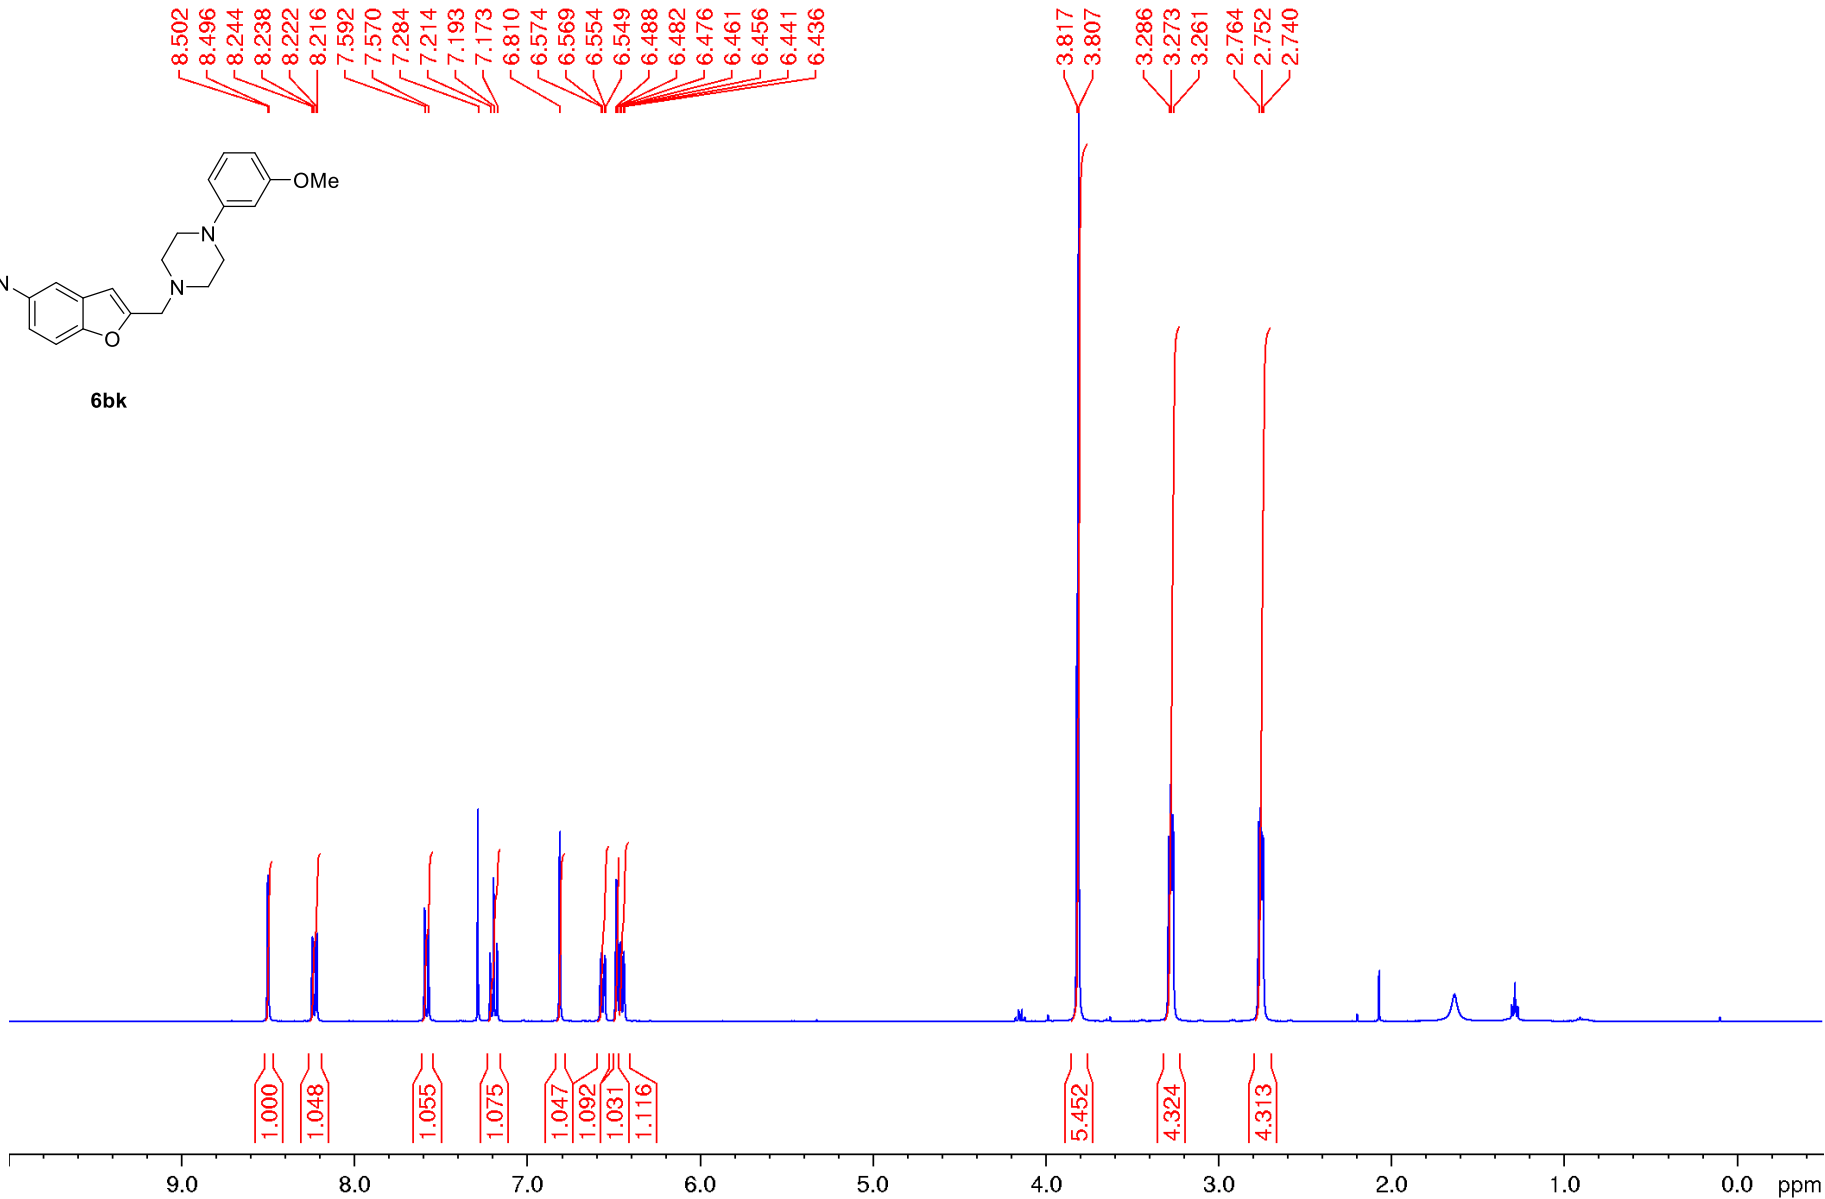

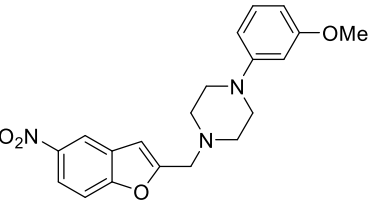

6bk

- 160.592
- 158.092
- 157.926
- 152.526
- 144.175
- 129.833
- 128.660
- 120.031
- 117.306
- 111.641
- 109.003
- 106.446
- 104.562
- 102.726
- 55.298
- 55.198
- 53.120
- 49.005

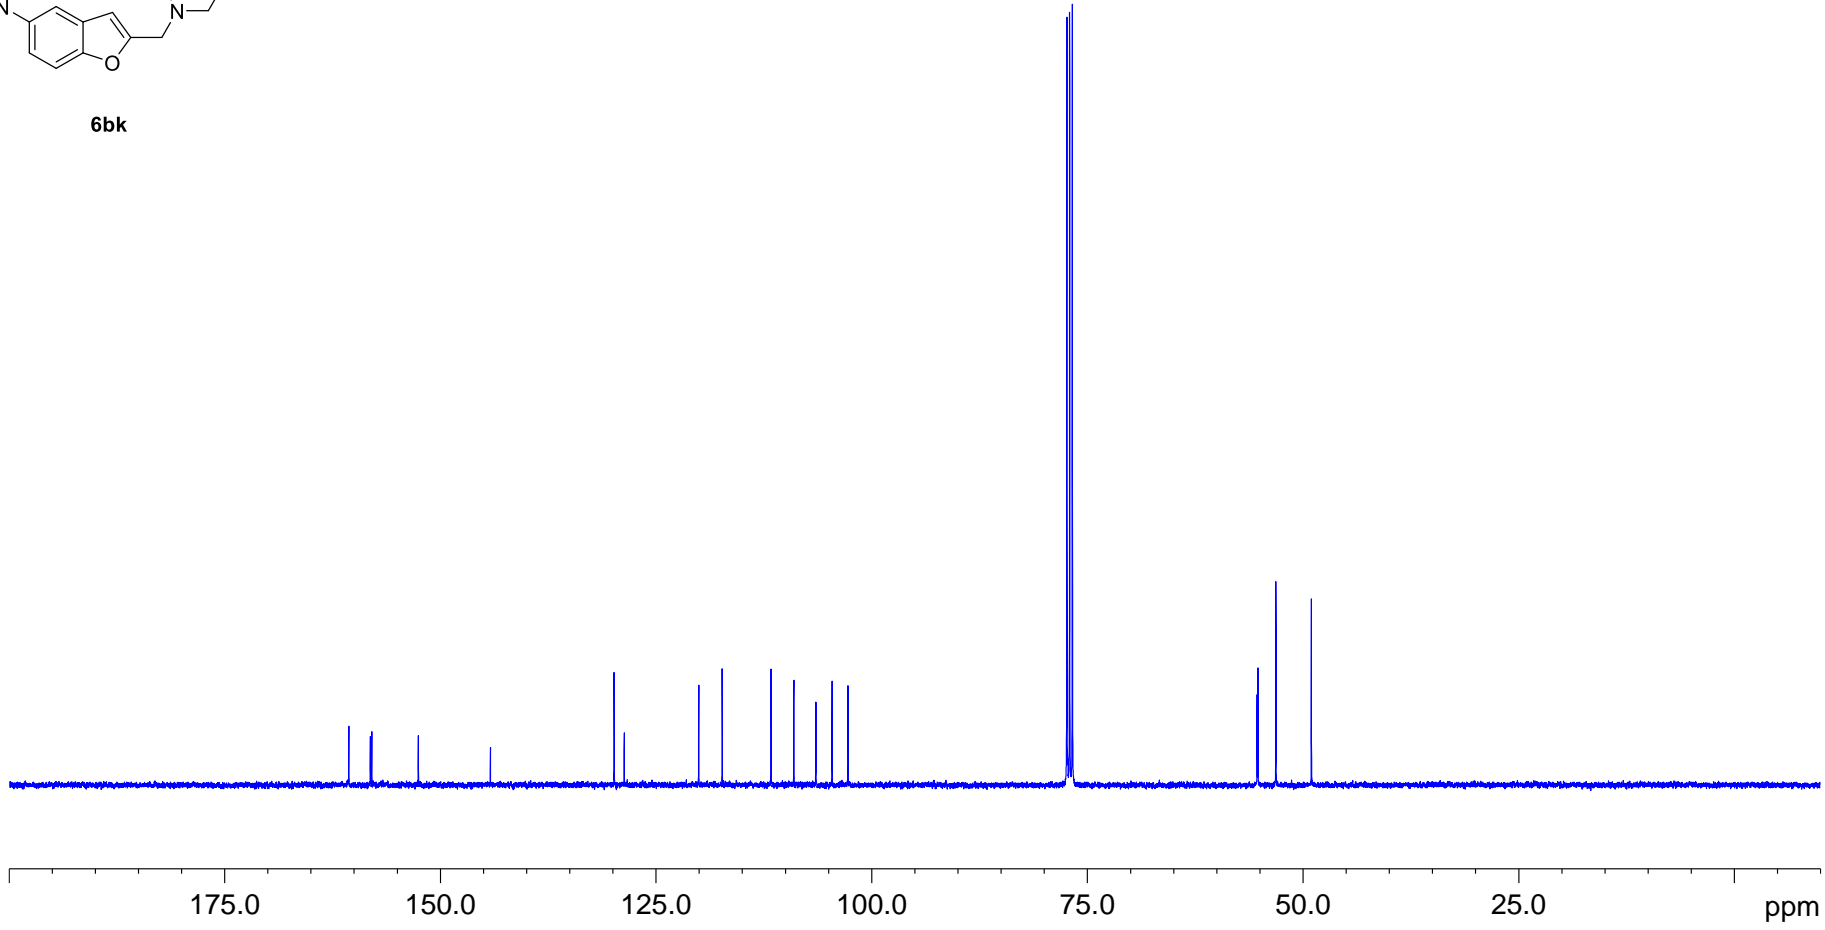

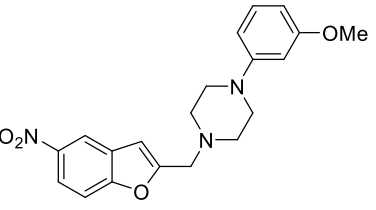

6bk

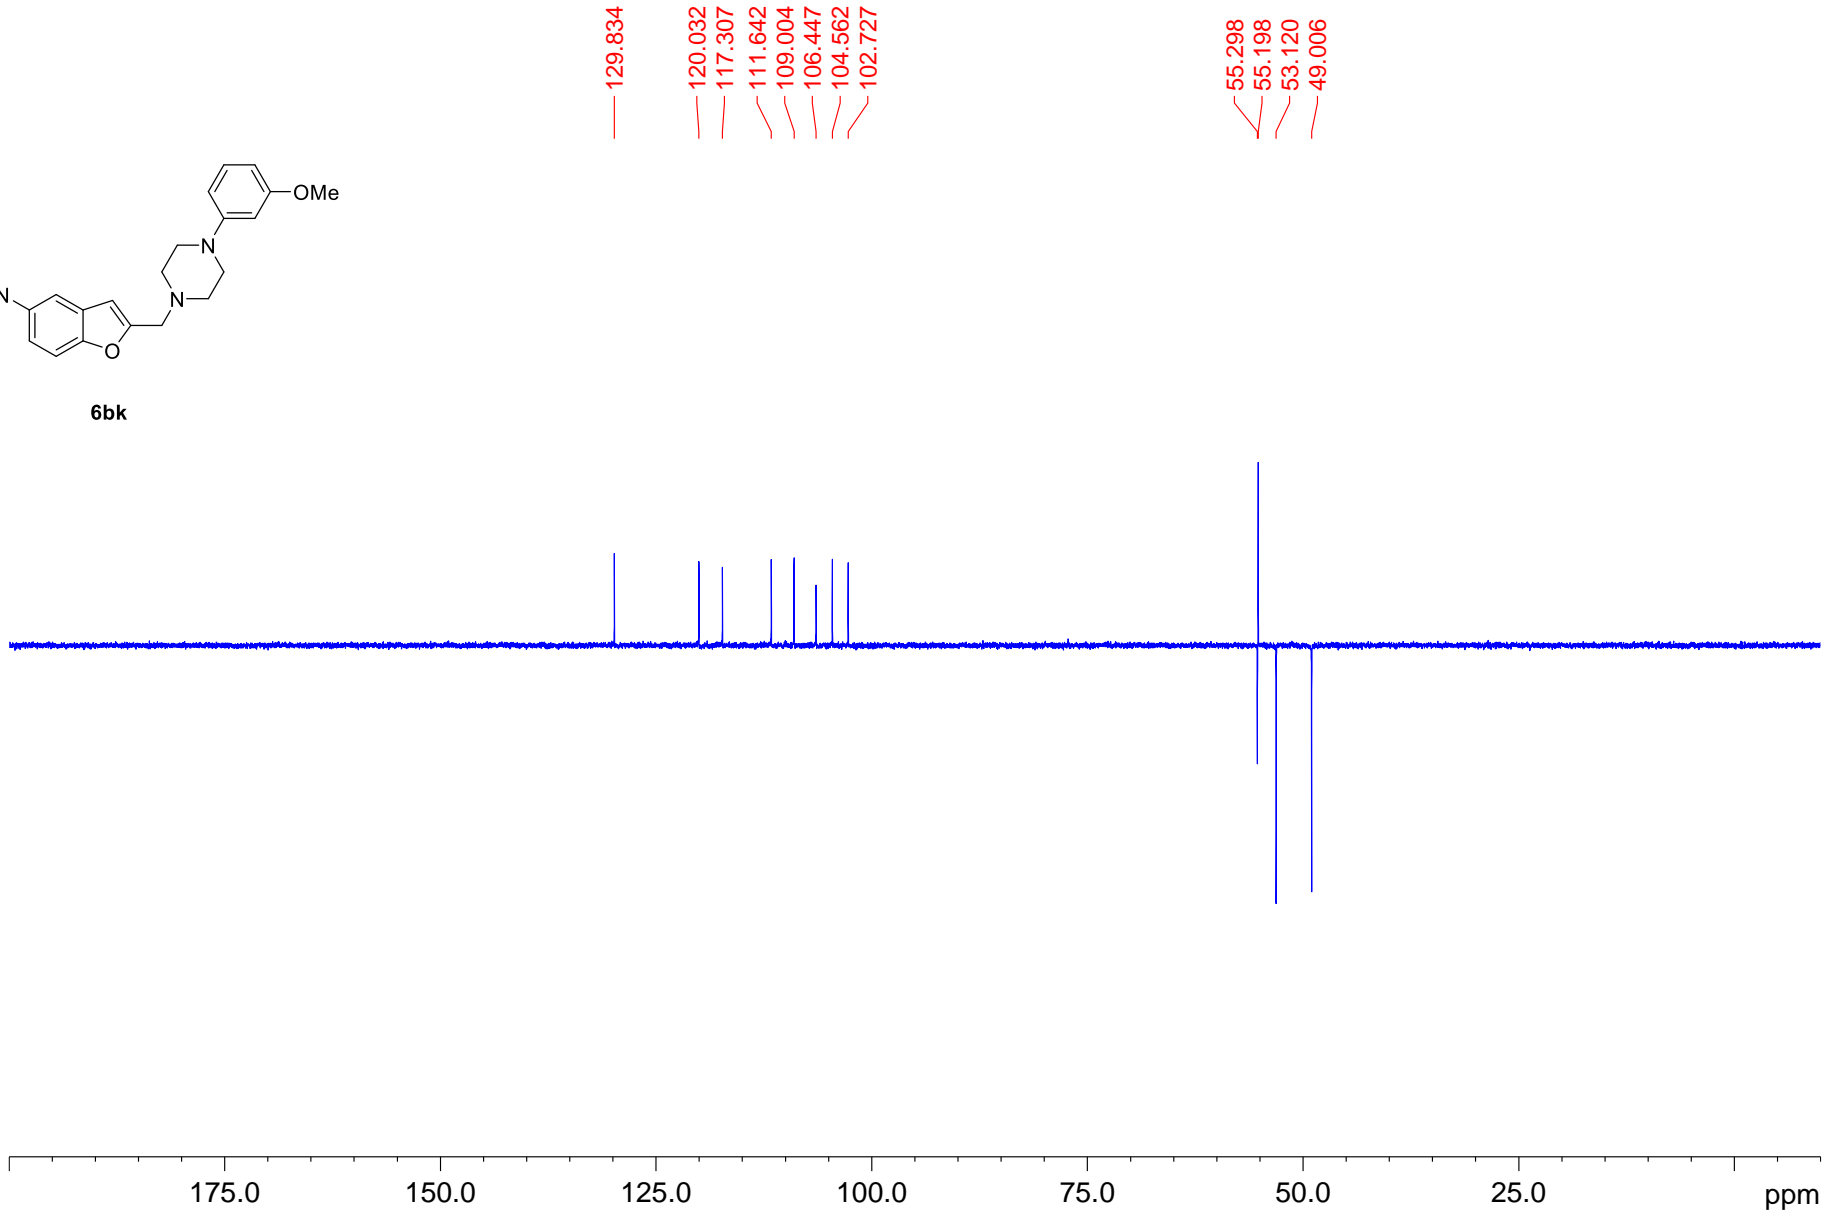



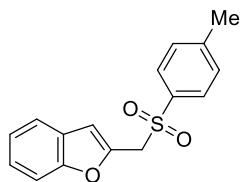

8aa

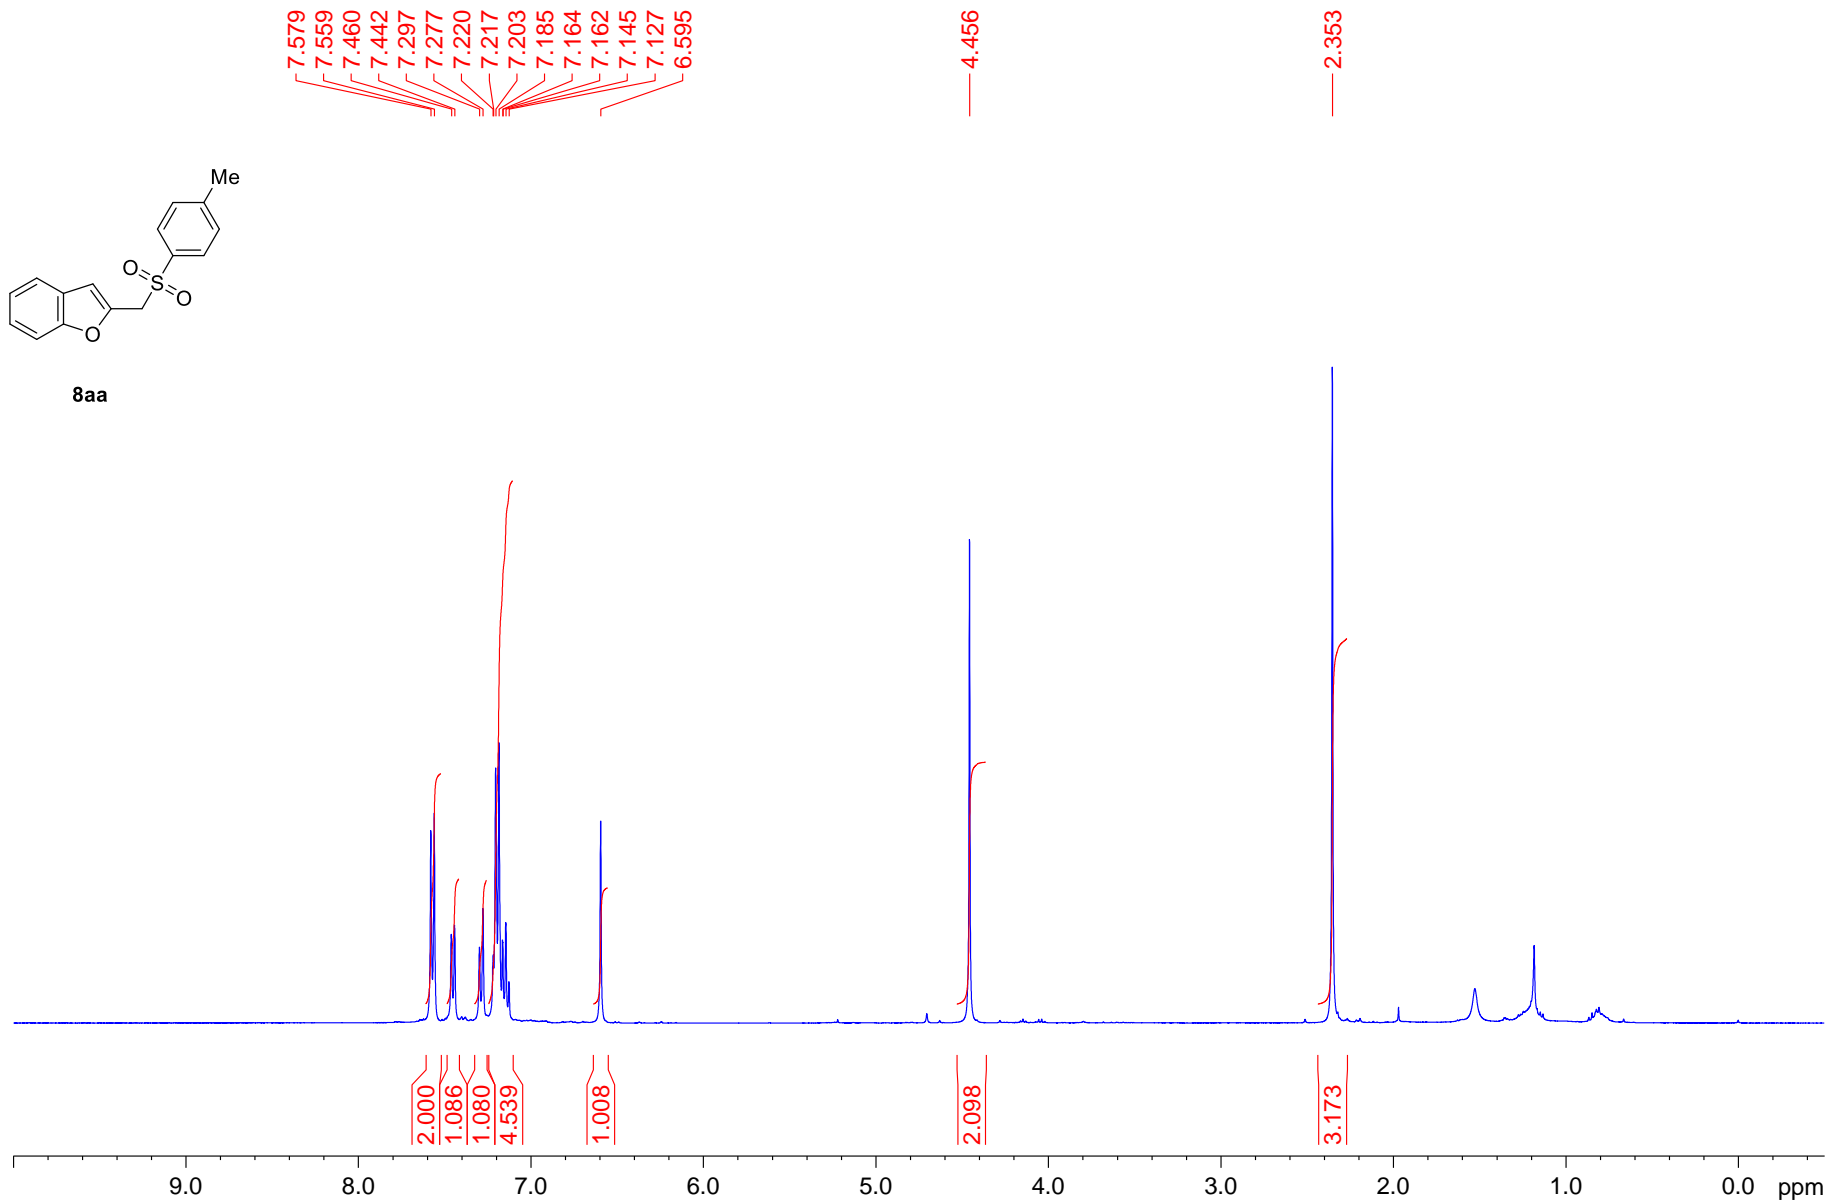

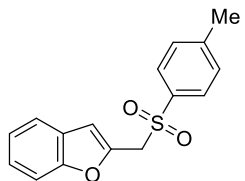

8aa

- 155.256
- 145.281
- 145.137
- 135.271
- 129.767
- 128.544
- 127.936
- 124.939
- 123.107
- 121.244
- 111.307
- 108.867
- 77.360
- 77.043
- 76.725
- 56.498
- 21.681

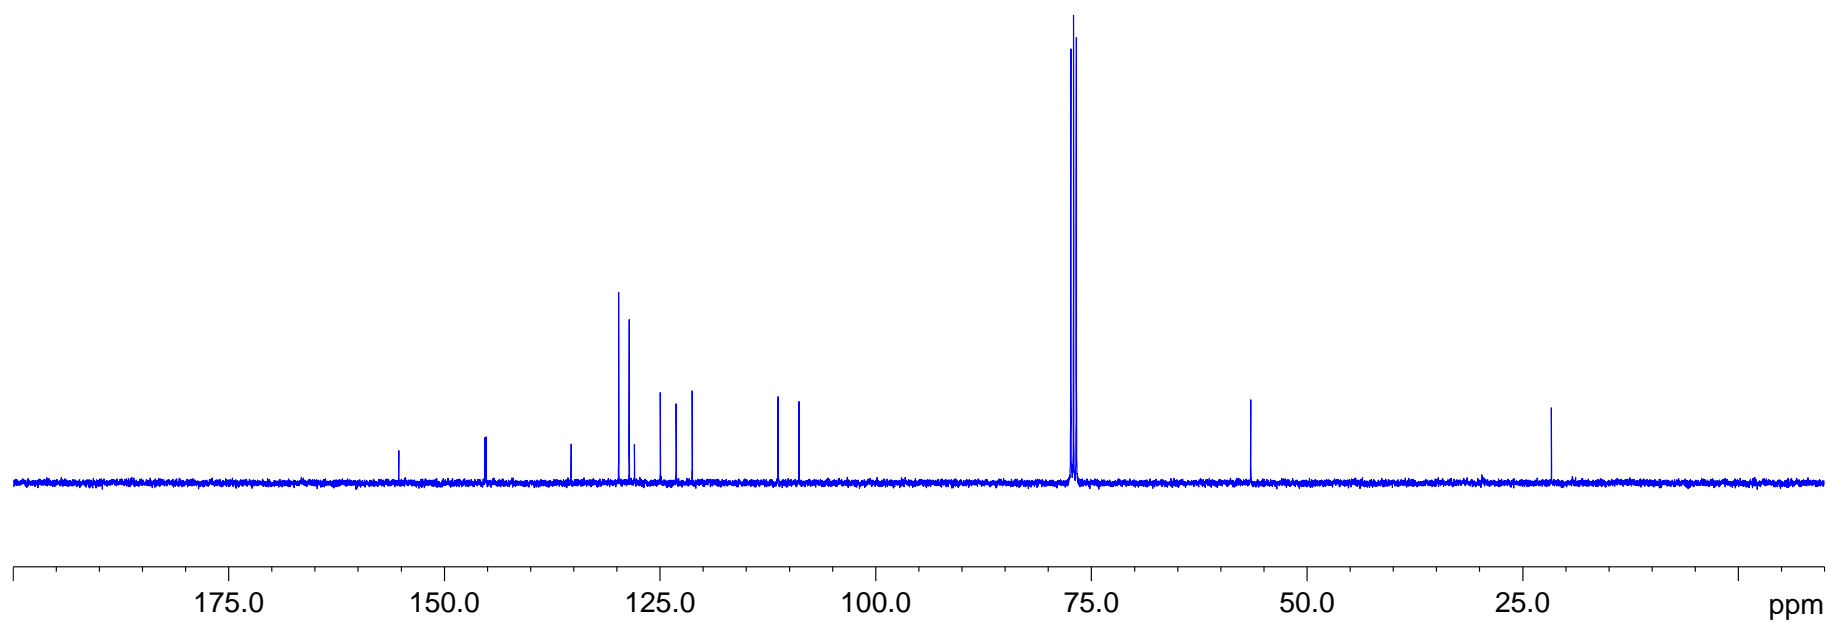

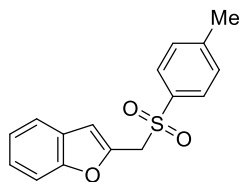

8aa

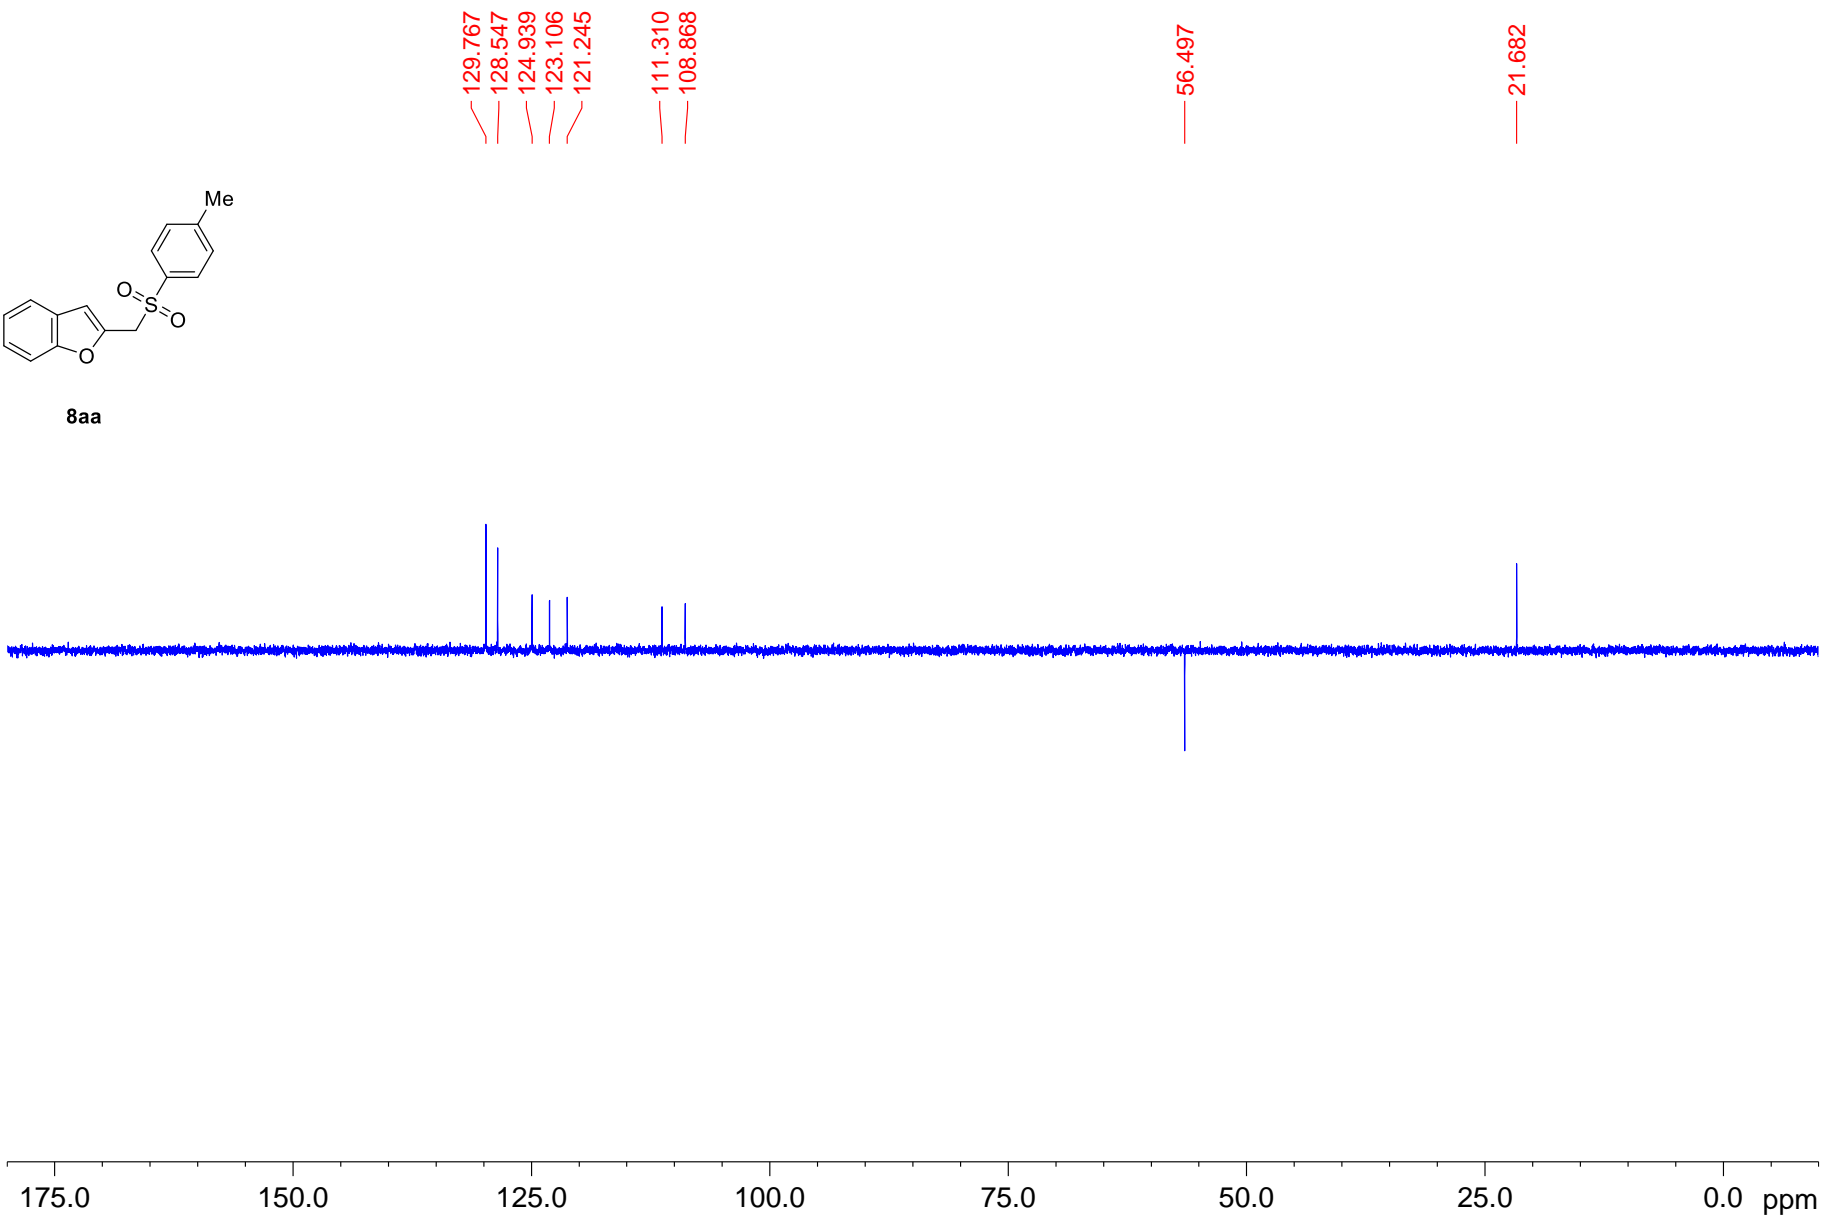

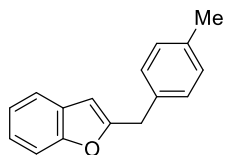

8'aa

7.497  
7.495  
7.480  
7.476  
7.434  
7.415  
7.284  
7.229  
7.226  
7.212  
7.205  
7.190  
7.187  
7.172  
7.152  
6.386  
6.385

4.095

2.363

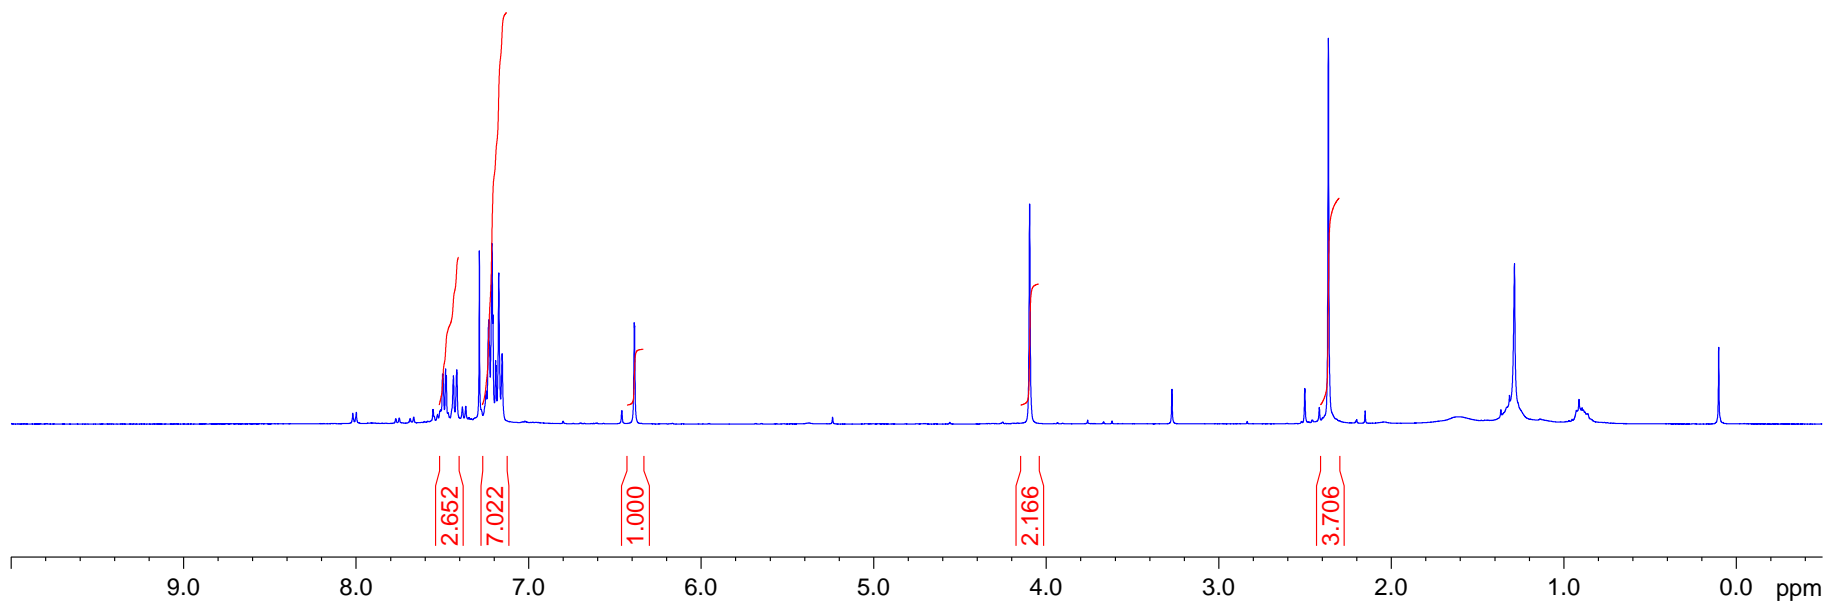



8'aa

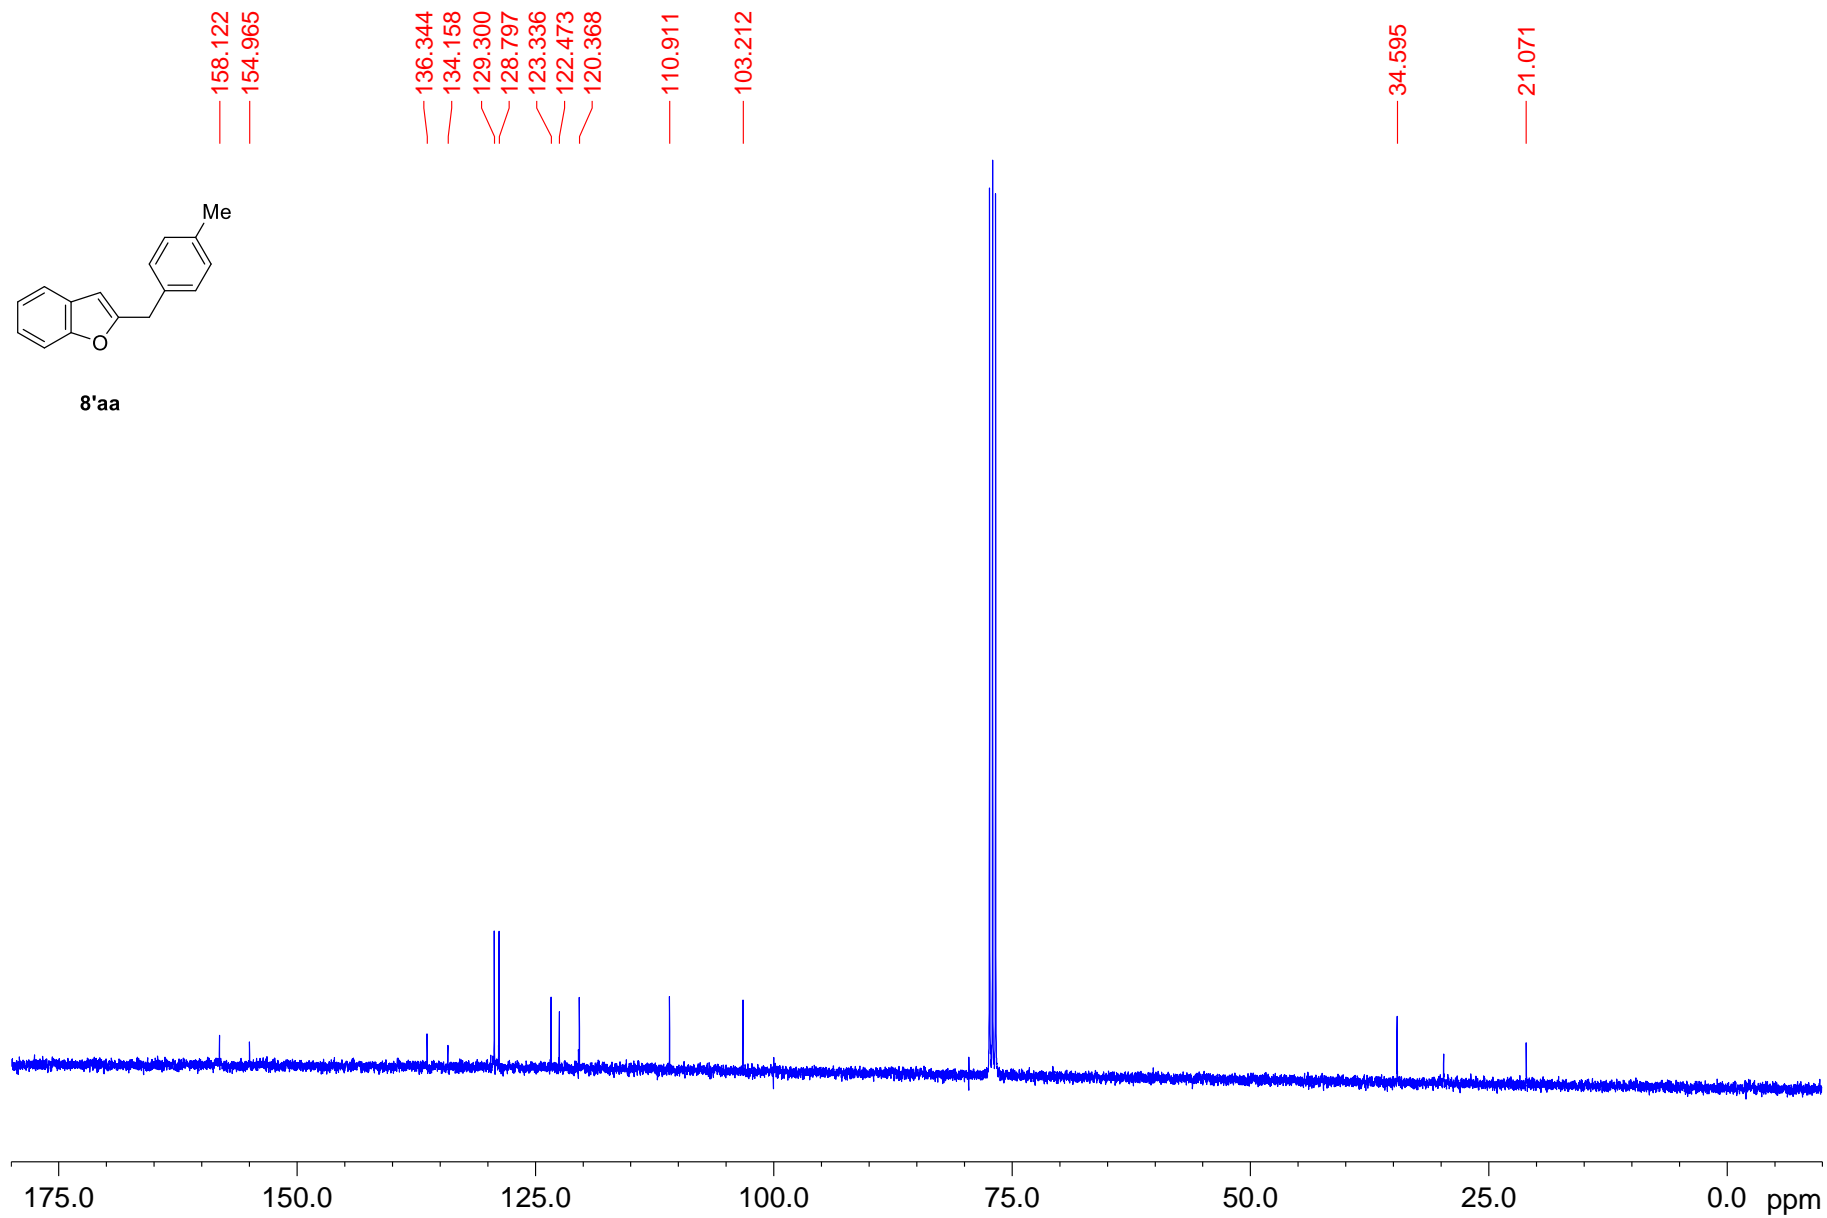

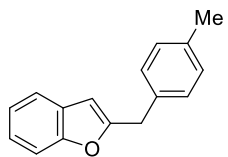

8'aa

129.300  
128.798  
123.338  
122.473  
120.368

110.912

103.212

34.598

21.072

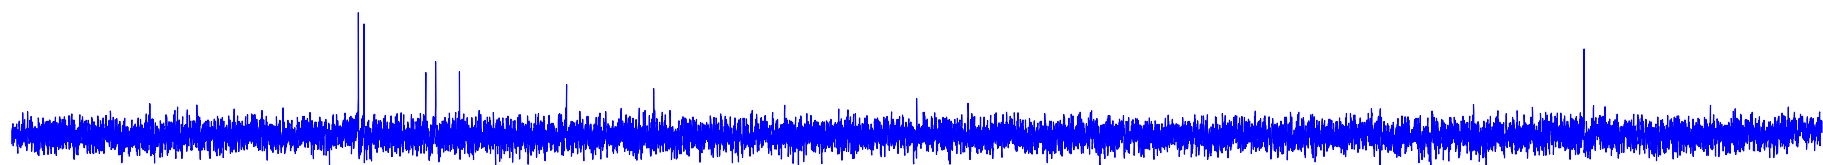

150.0

125.0

100.0

75.0

50.0

25.0

ppm

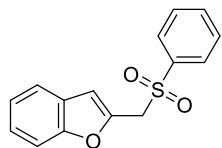

8ab

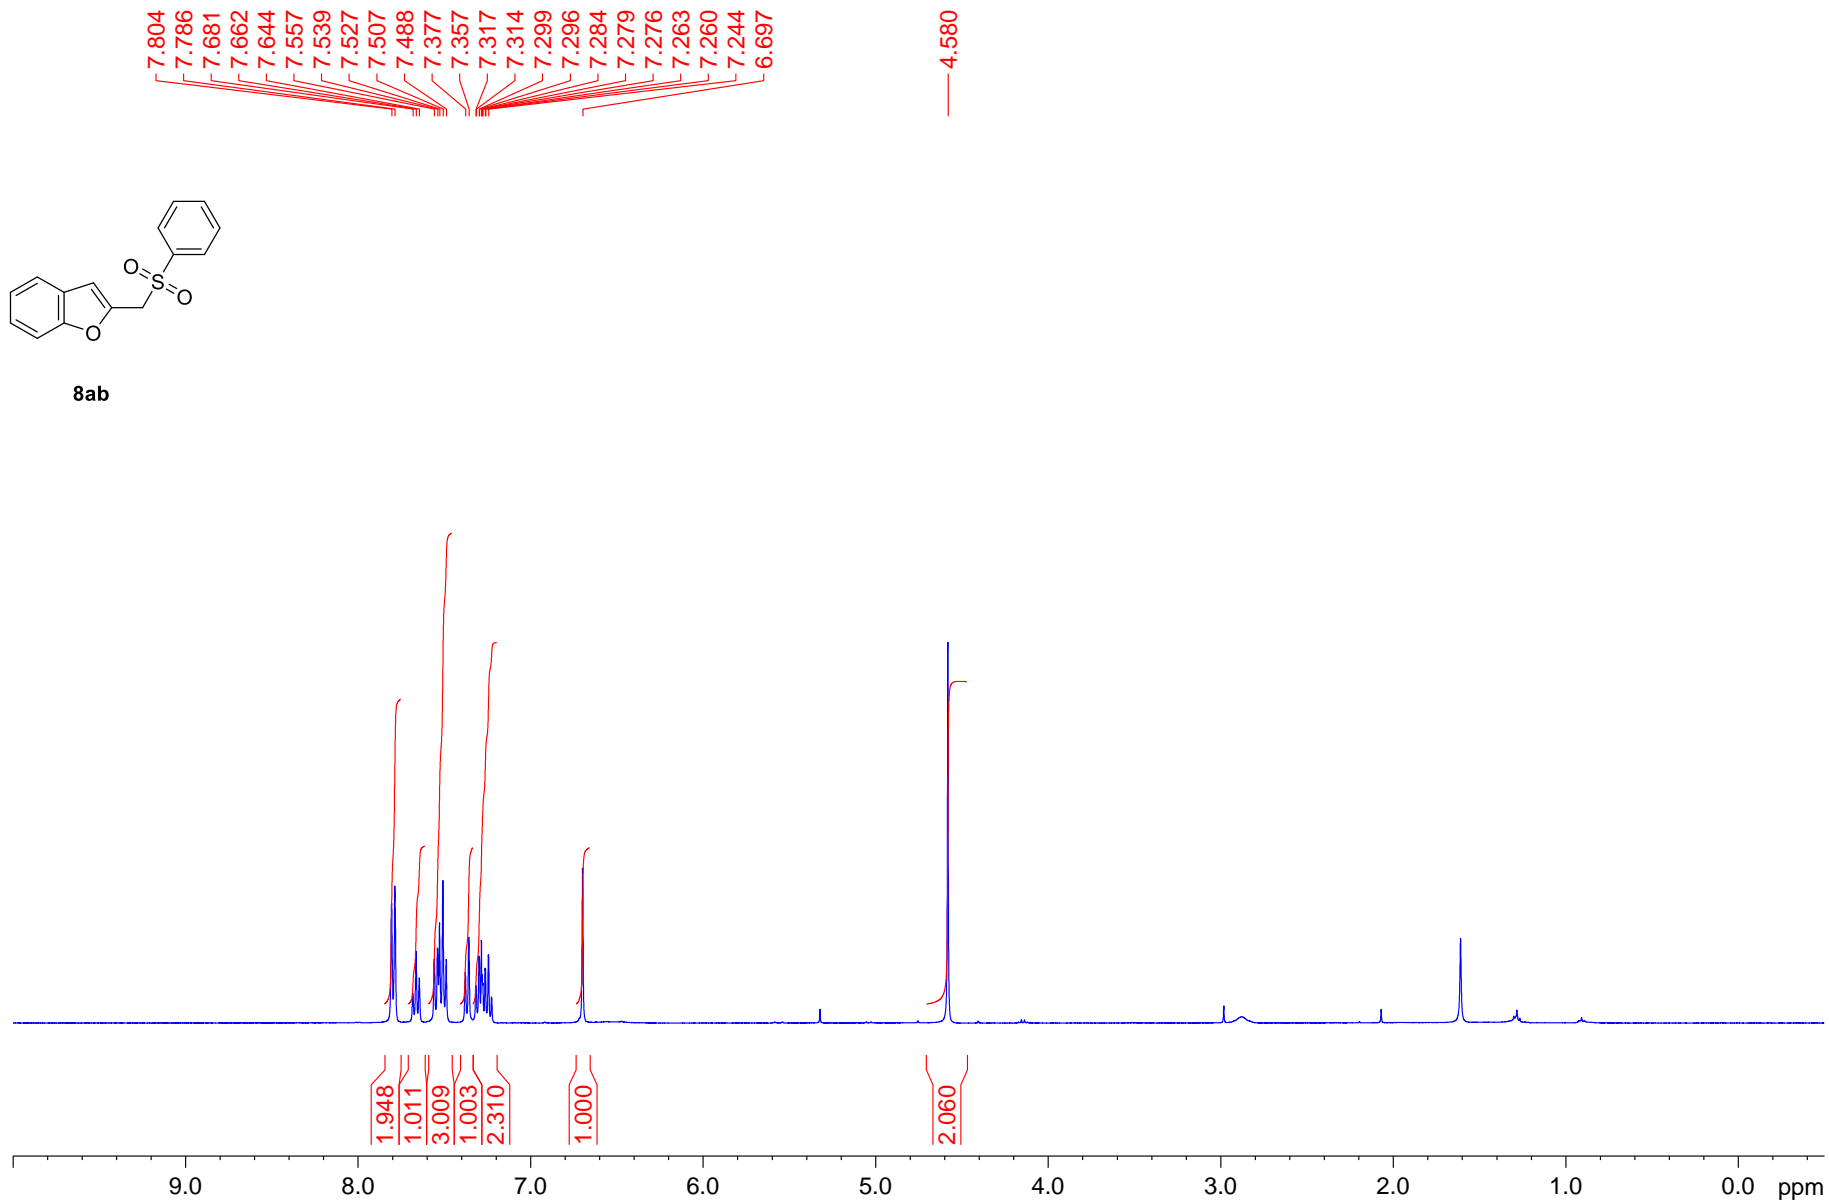

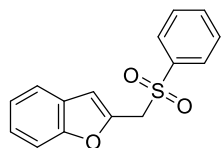

8ab

155.250  
145.054  
138.197  
134.062  
129.134  
128.541  
127.888  
125.006  
123.144  
121.257  
111.298  
108.968  
56.484

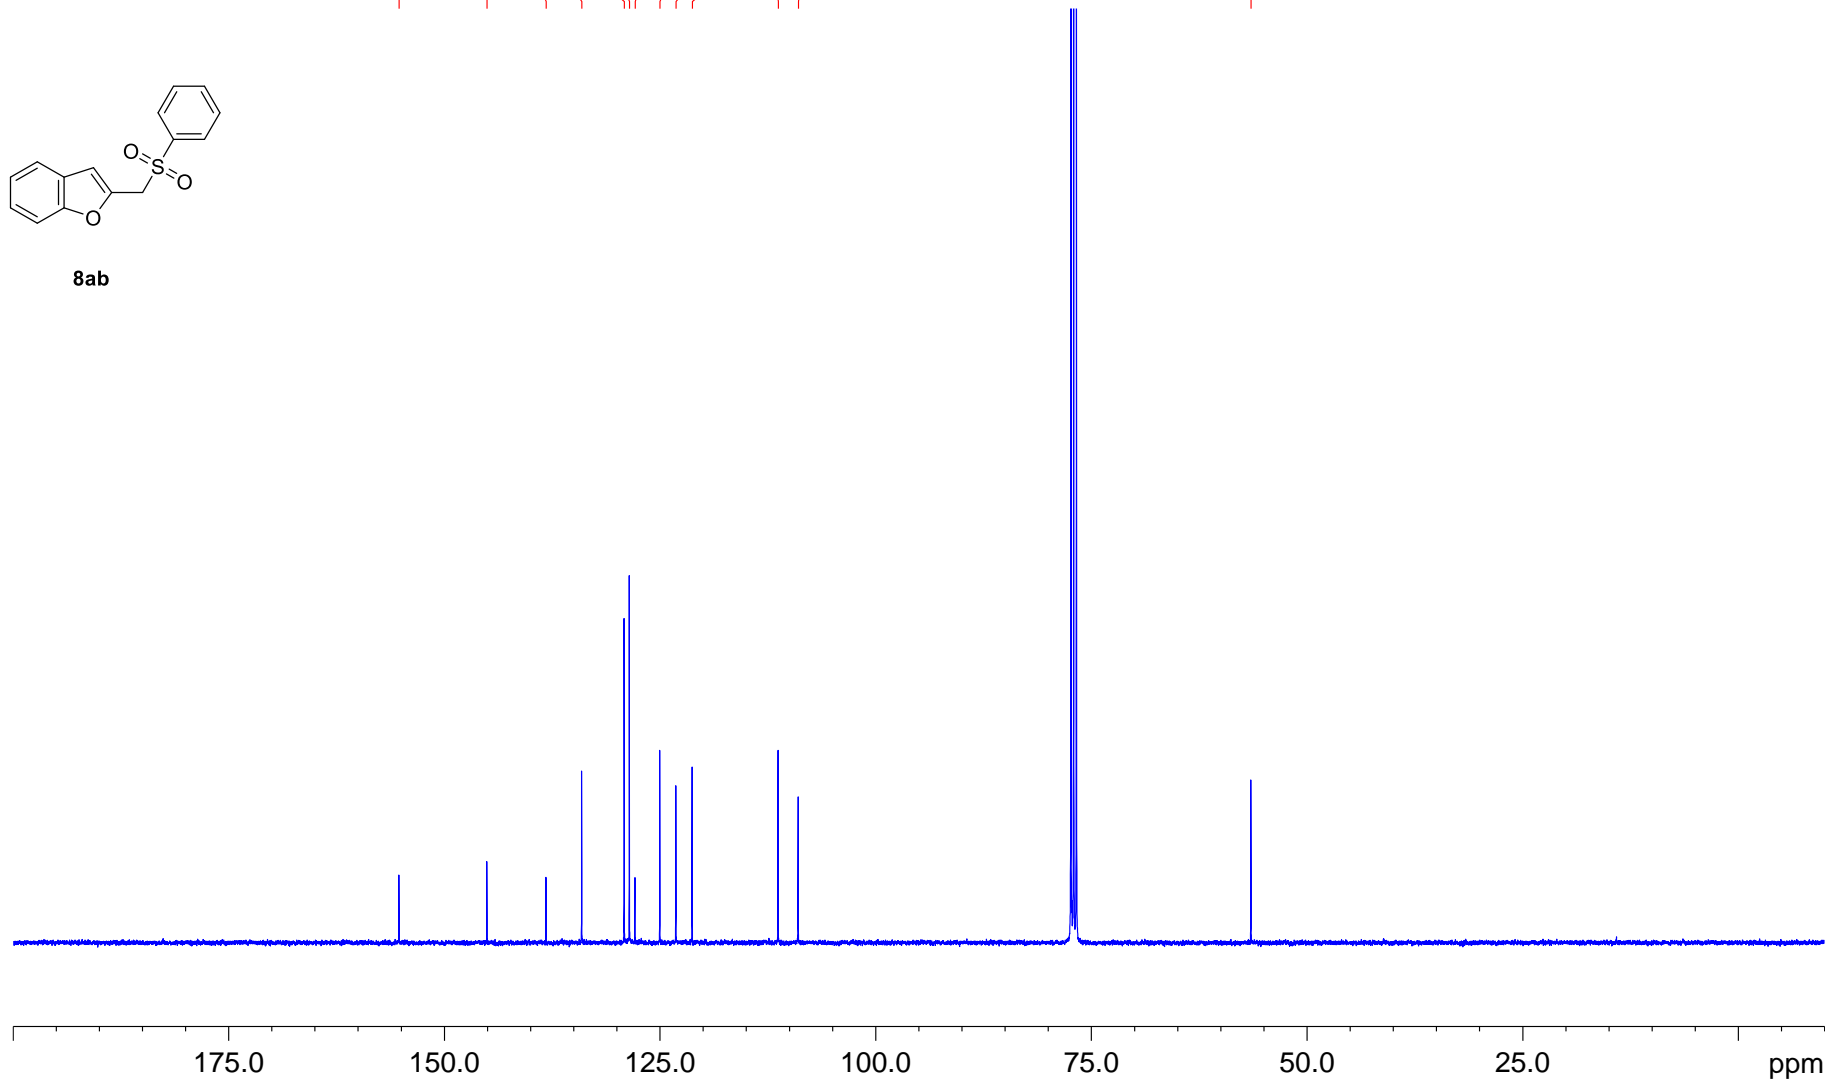





8ab

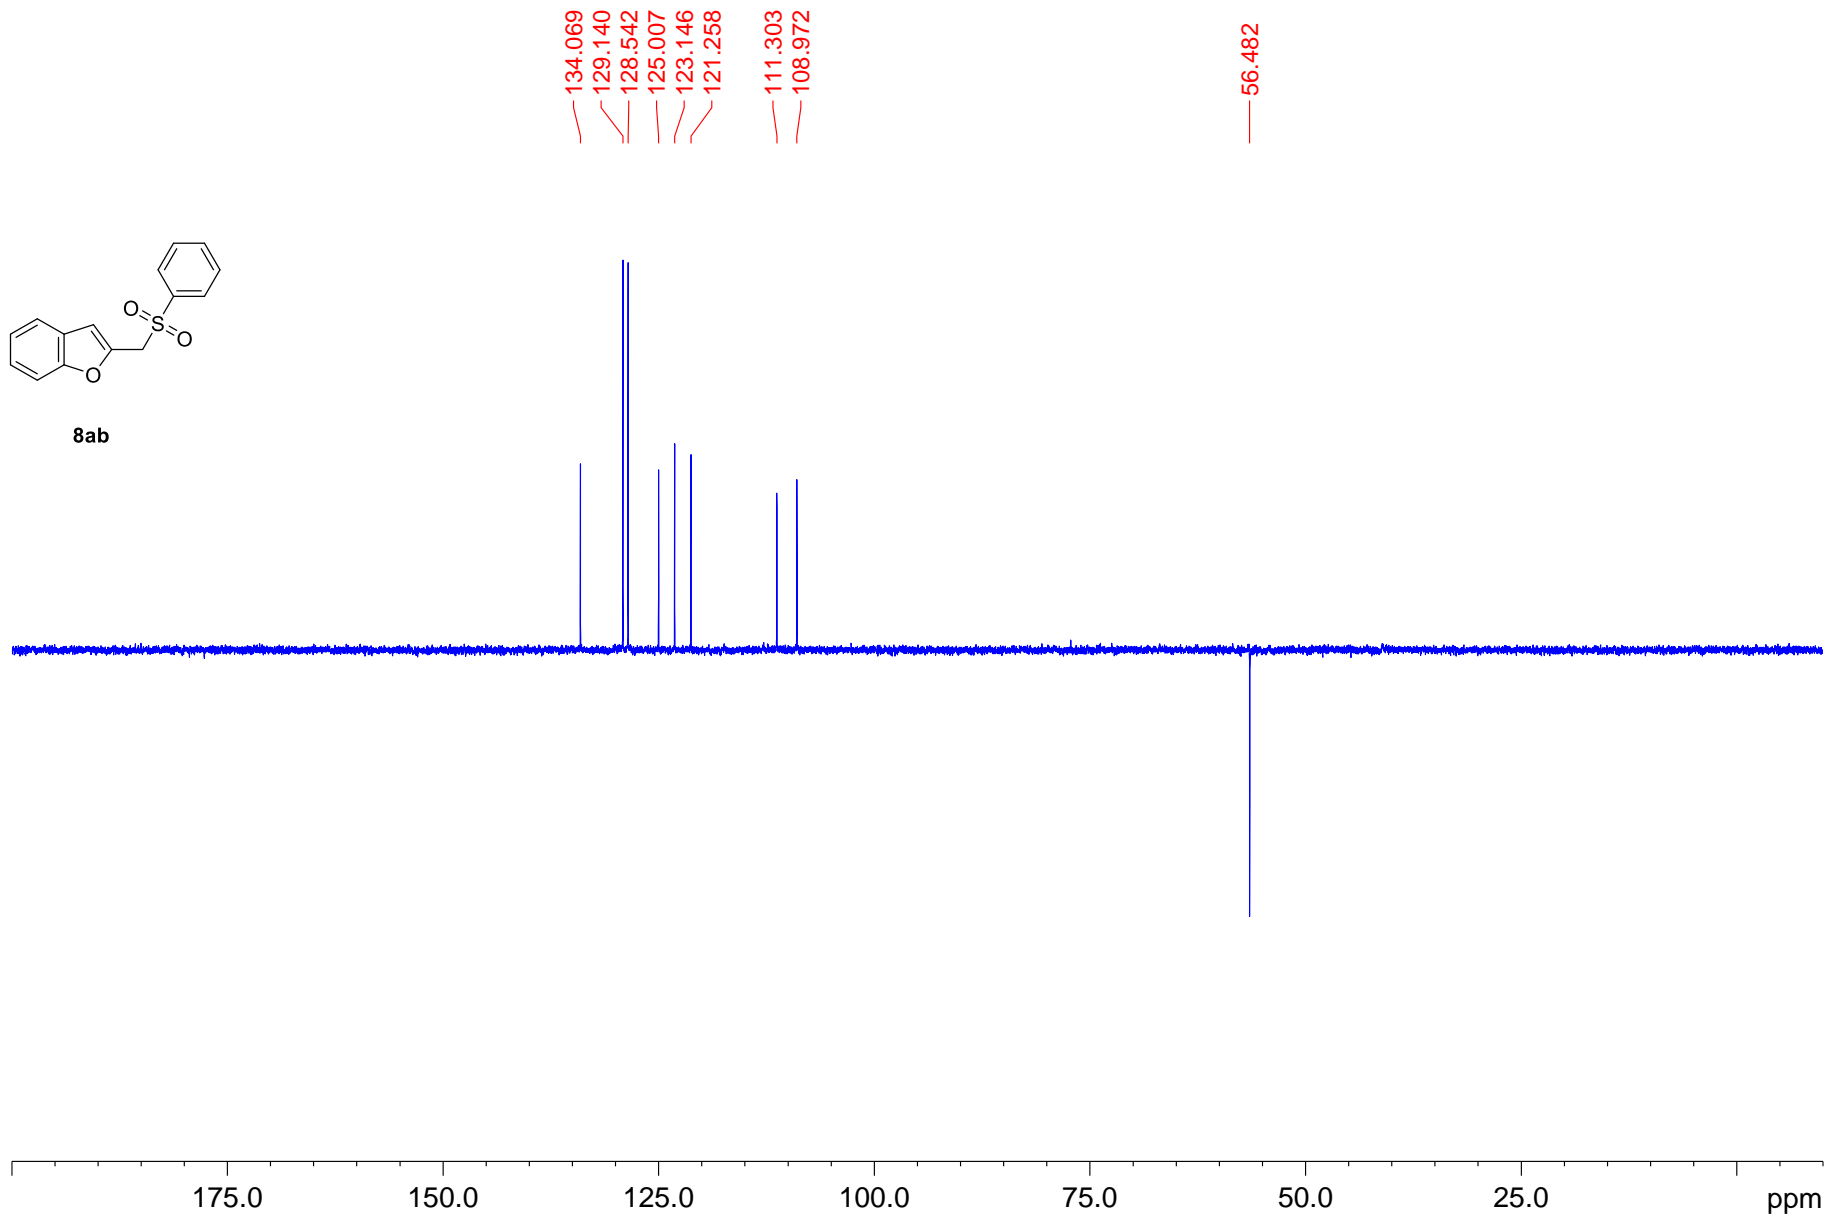

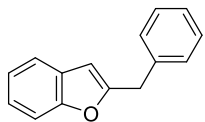

8'ab

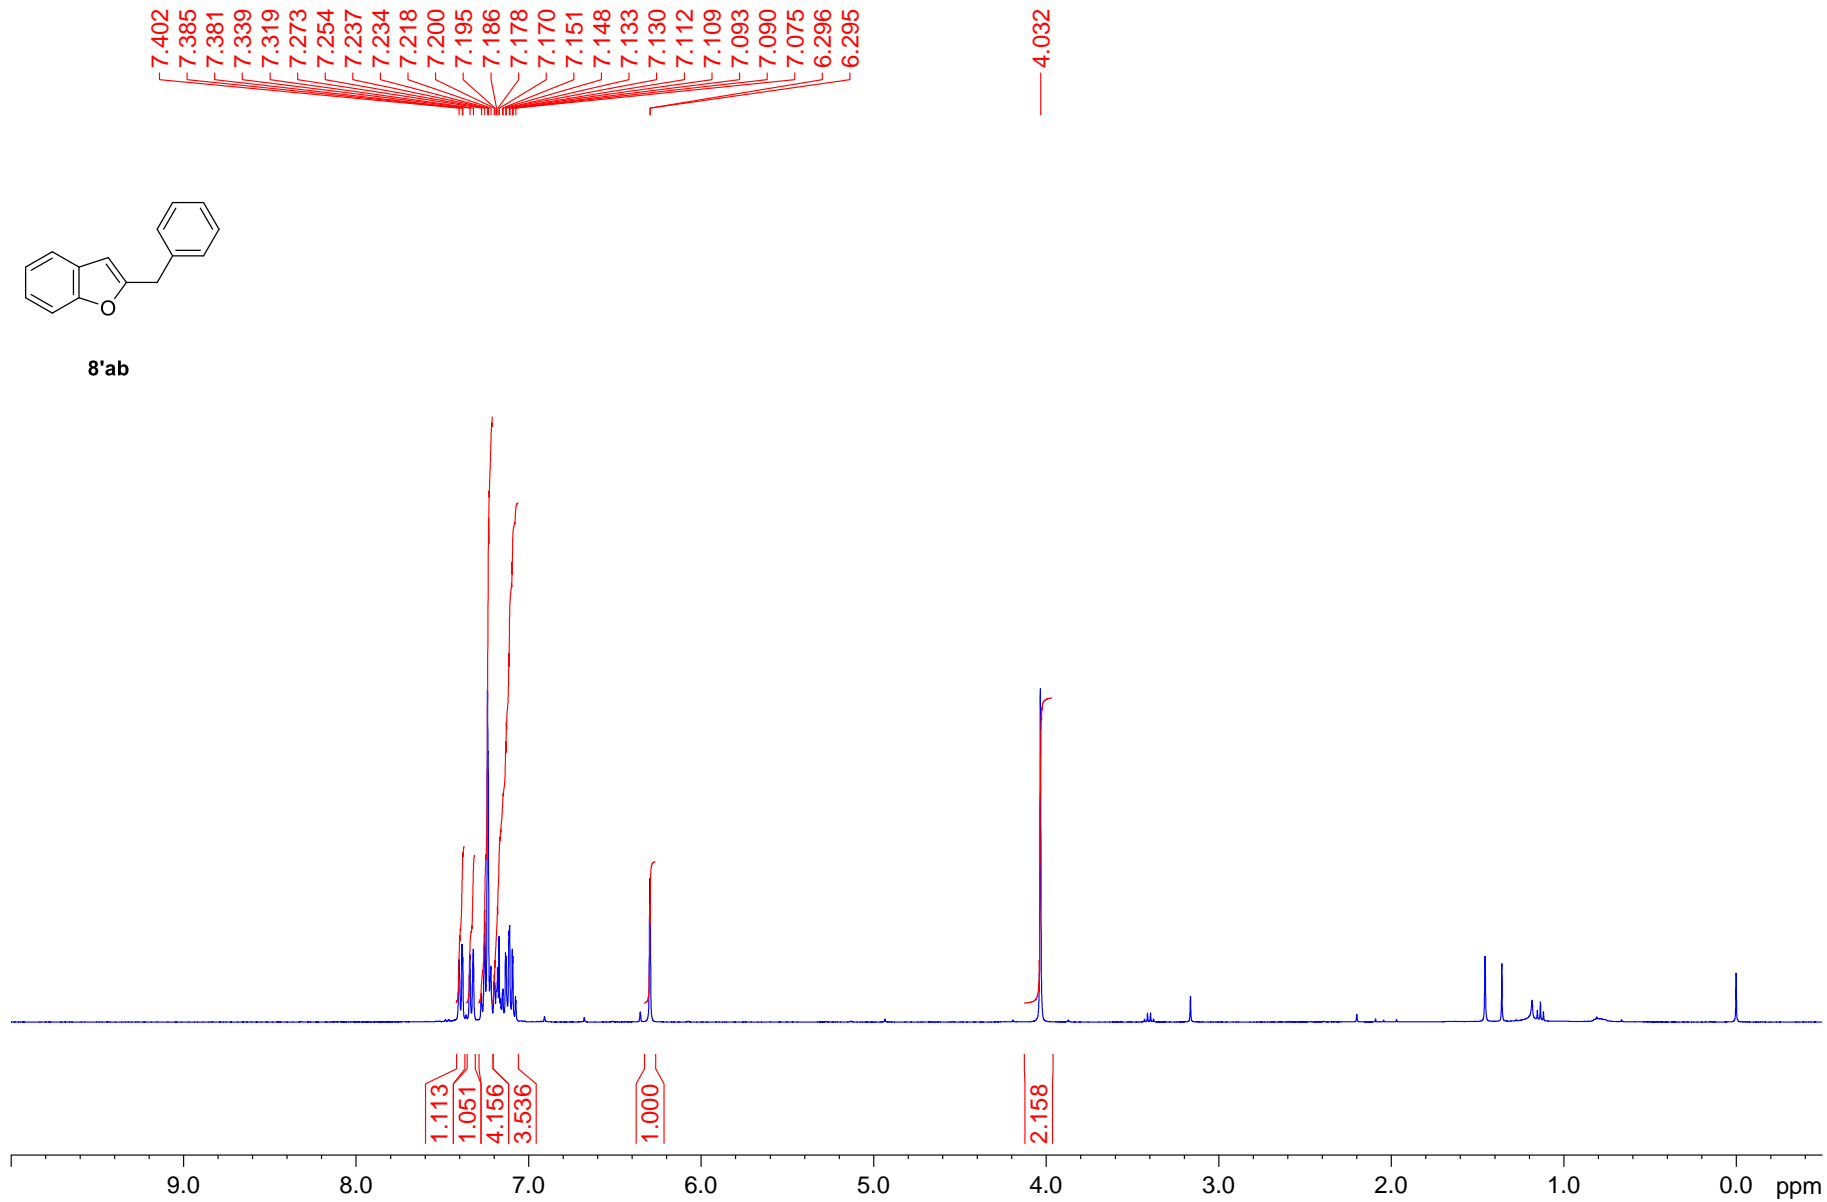



8'ab

157.811  
154.988  
137.255  
128.928  
128.827  
128.628  
126.782  
123.423  
122.527  
120.420  
110.927  
103.378  
35.023

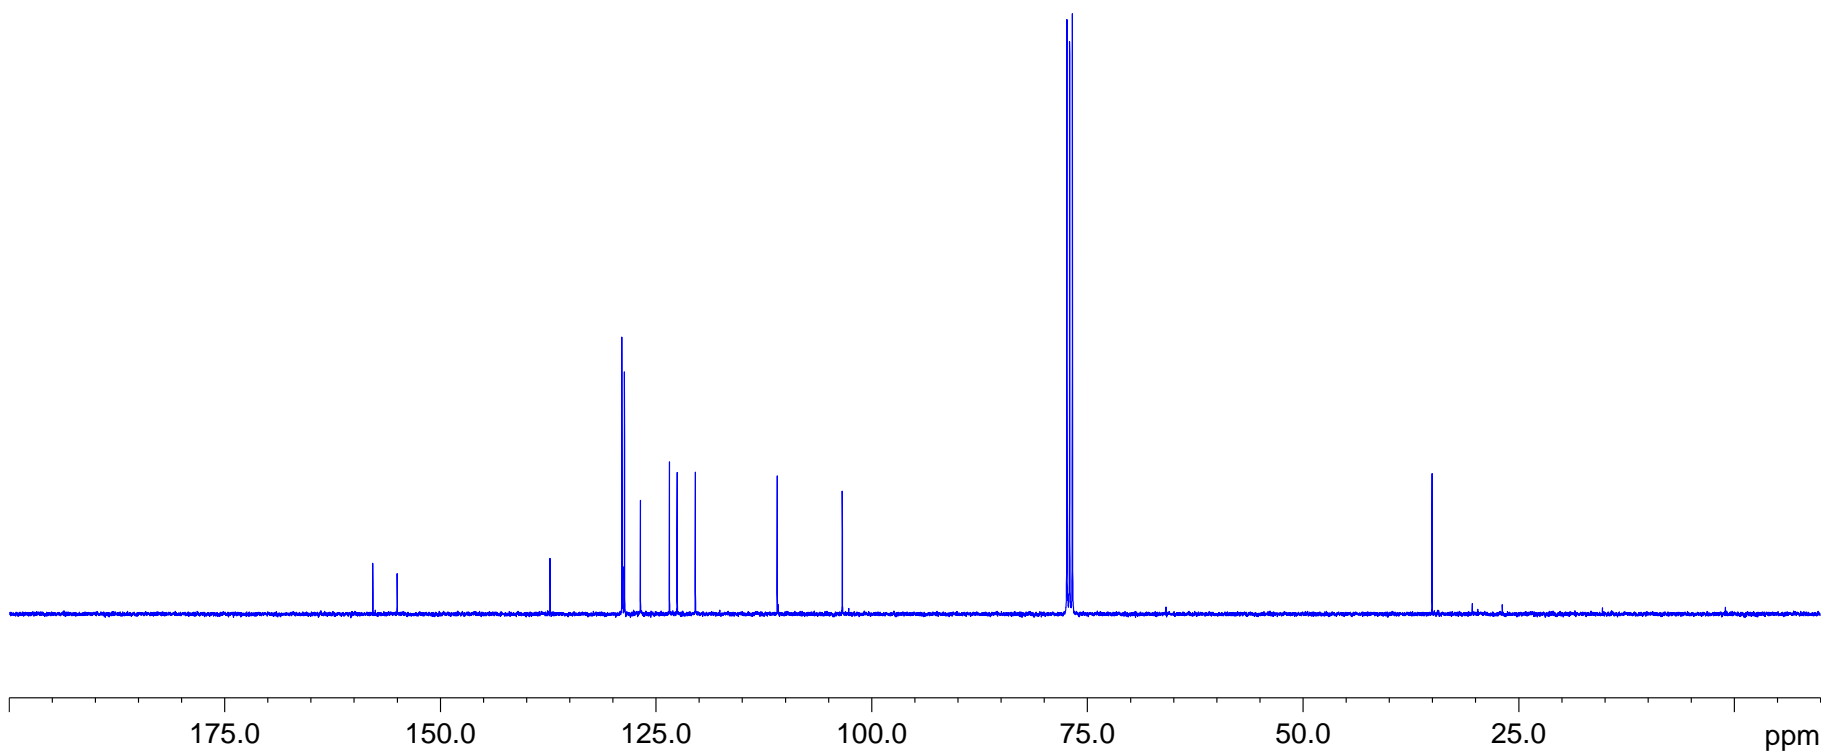

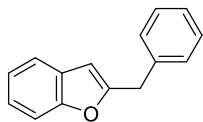

8'ab

128.929  
128.628  
126.782  
123.423  
122.527  
120.419

110.927

103.378

35.019

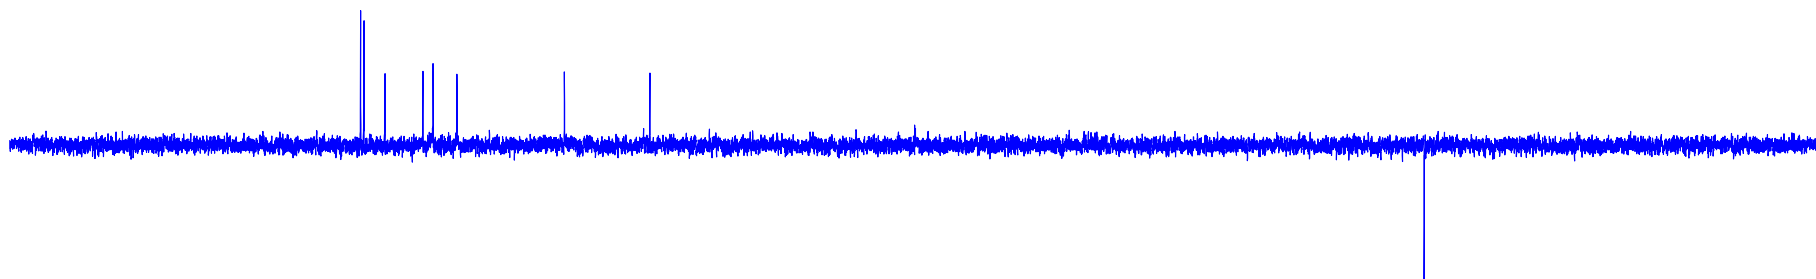

150.0

125.0

100.0

75.0

50.0

25.0

ppm

8.478  
8.472  
8.237  
8.231  
8.214  
8.209  
7.676  
7.655  
7.488  
7.466  
7.318  
7.298  
7.264  
6.810  
6.809

4.565

2.450

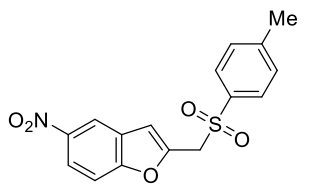

8ba

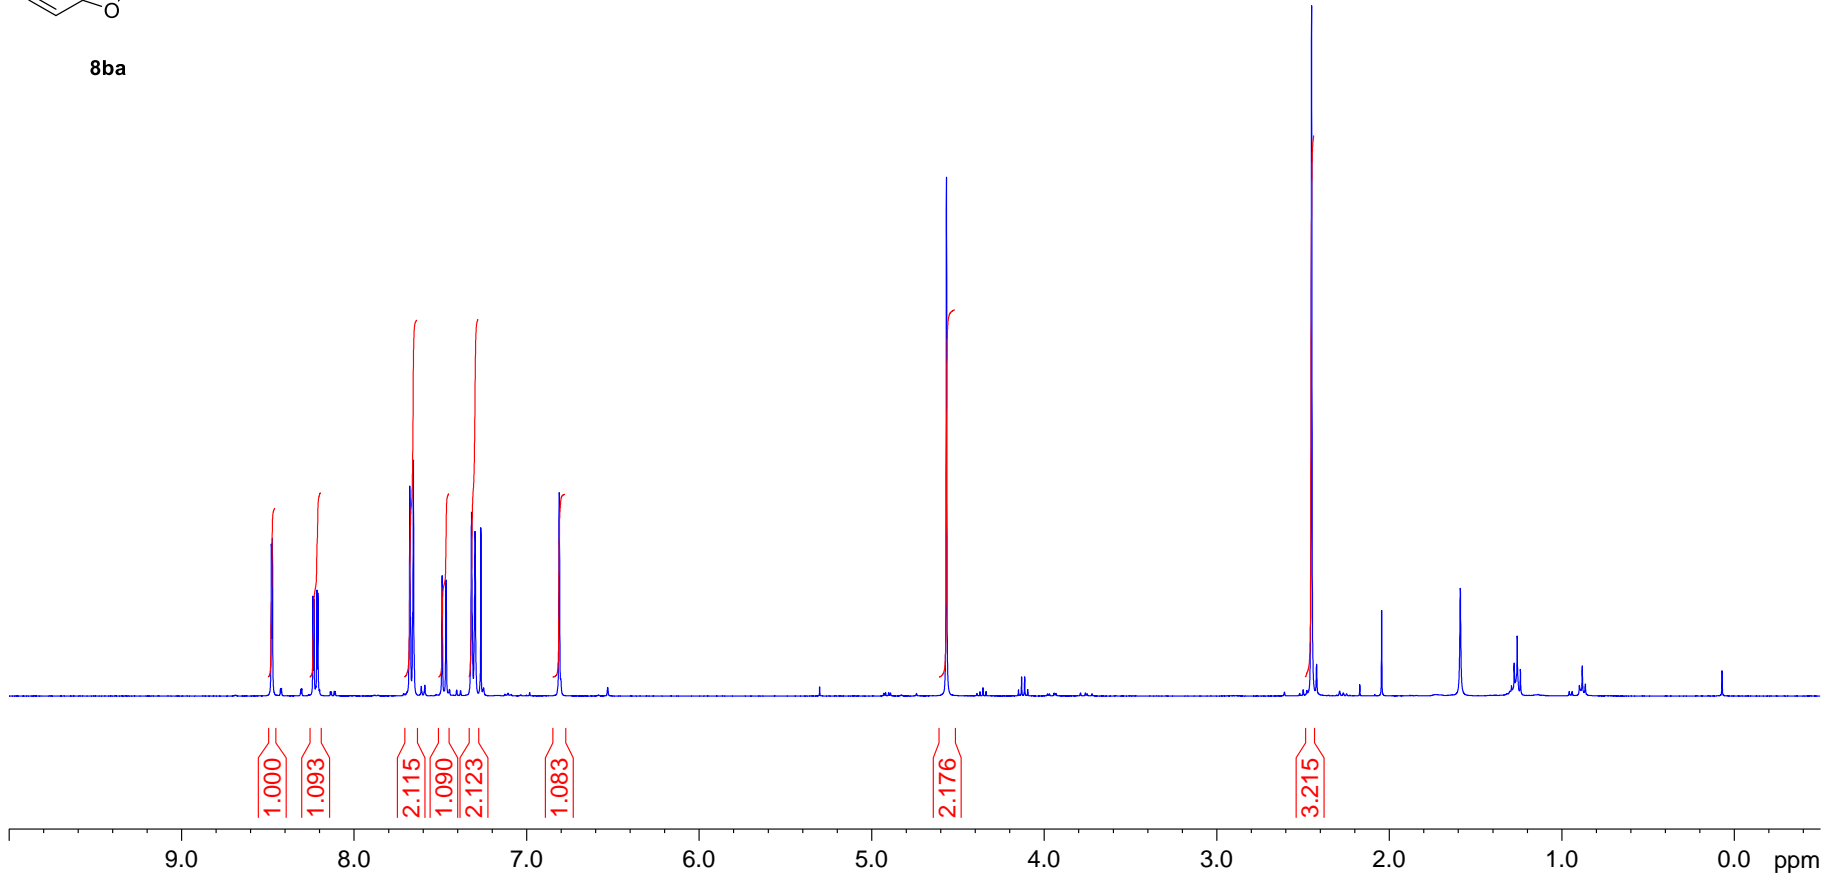

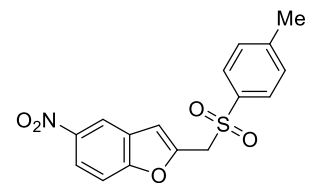

8ba

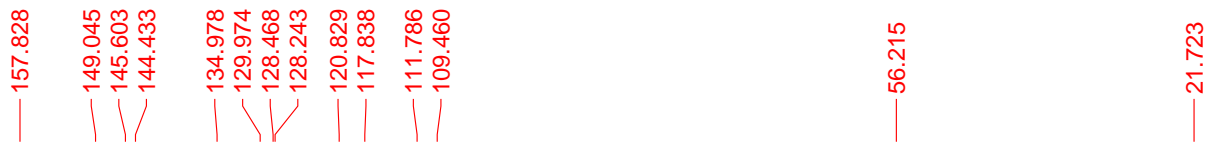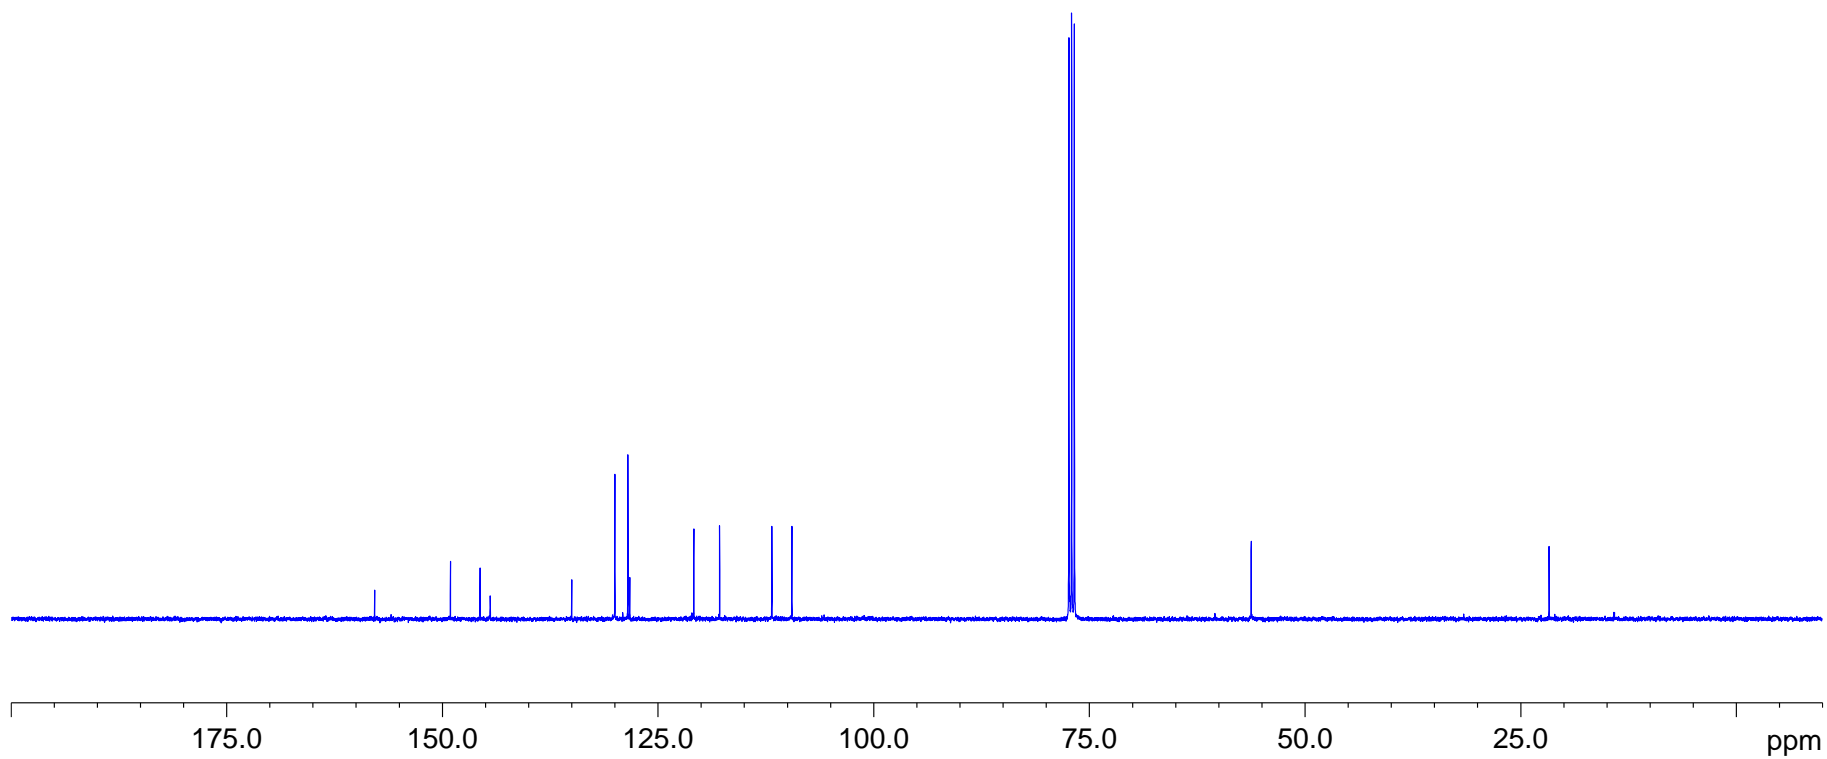

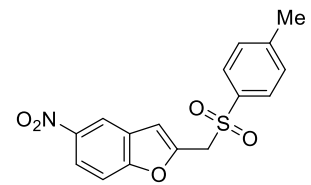

8ba

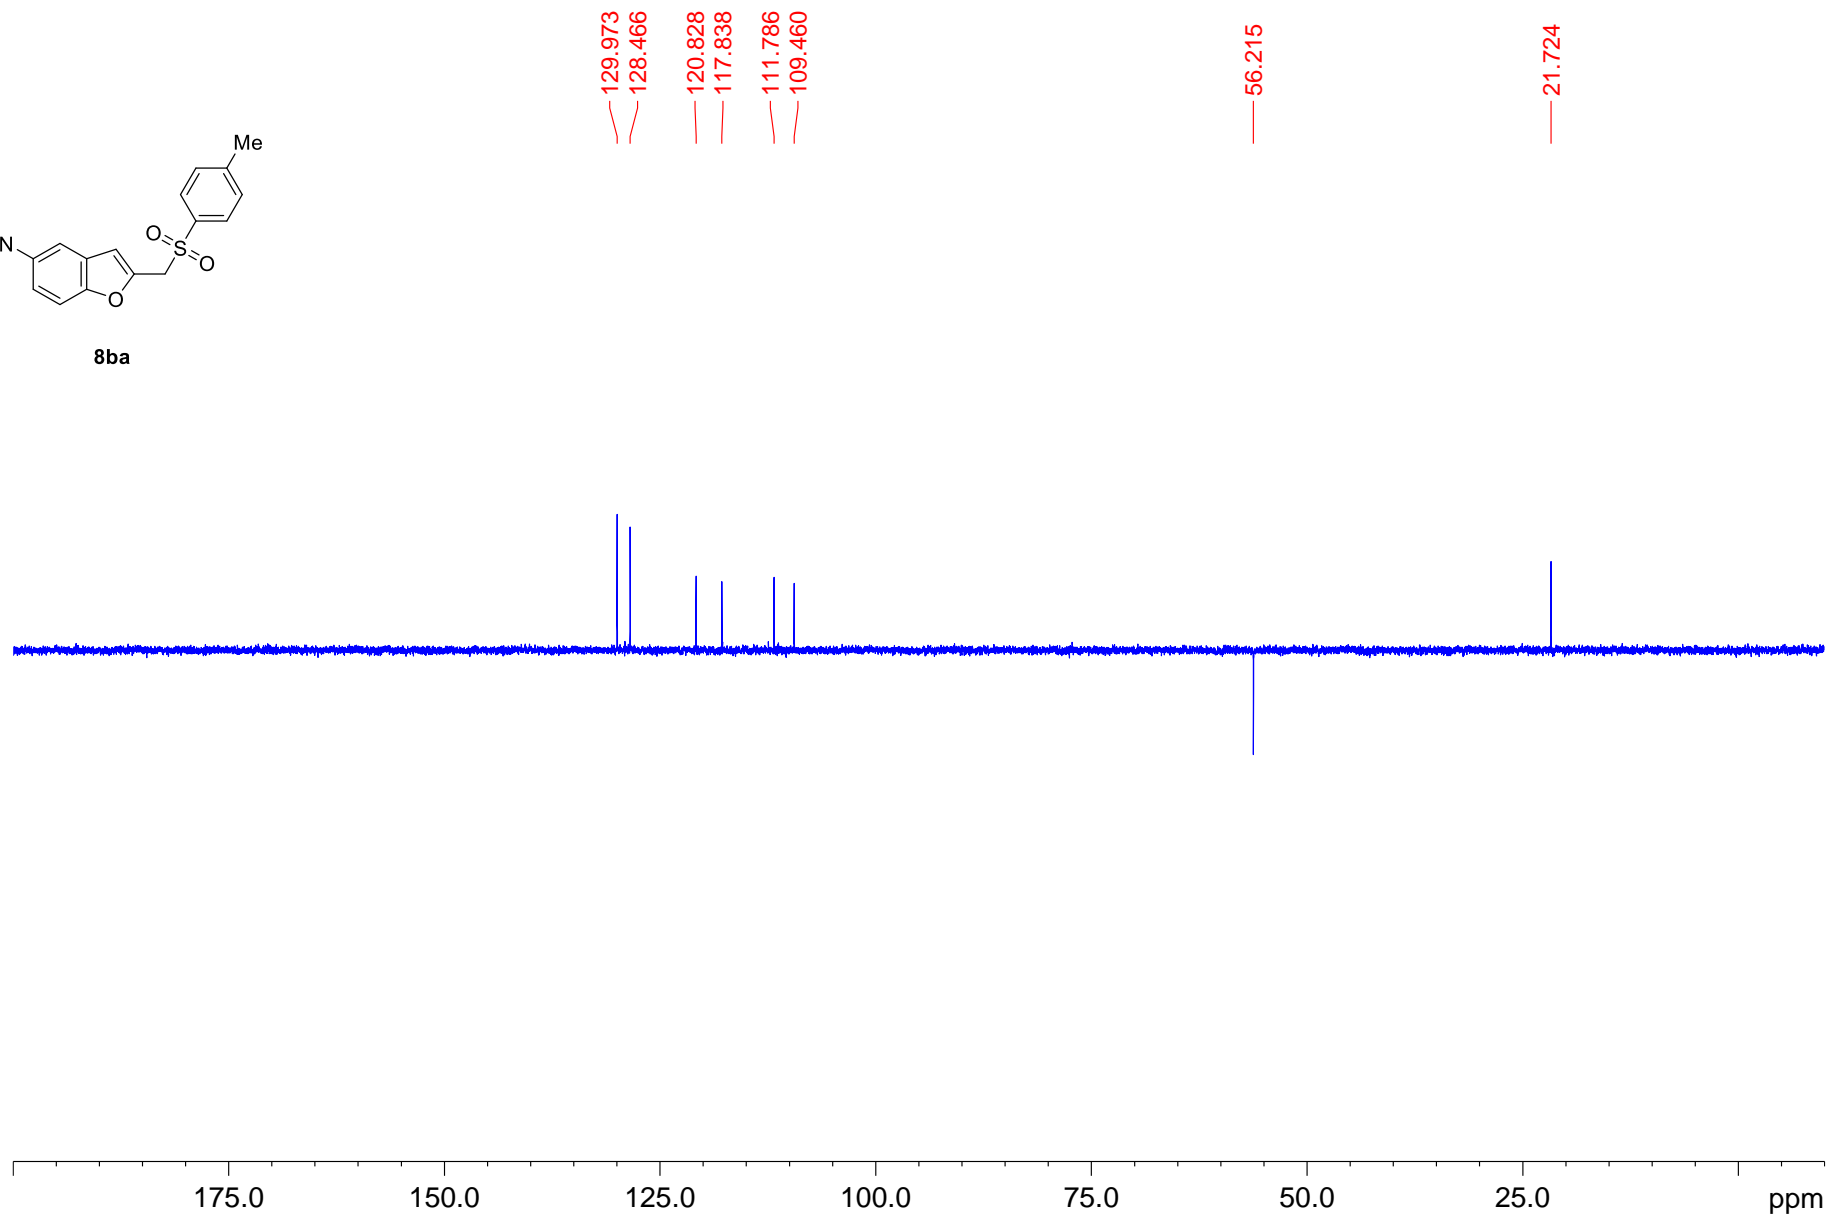

8.500  
8.494  
8.256  
8.250  
8.233  
8.228  
7.827  
7.808  
7.700  
7.564  
7.544  
7.525  
7.490  
7.467  
7.284  
6.845

4.611

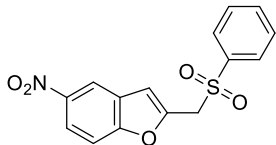

8bb

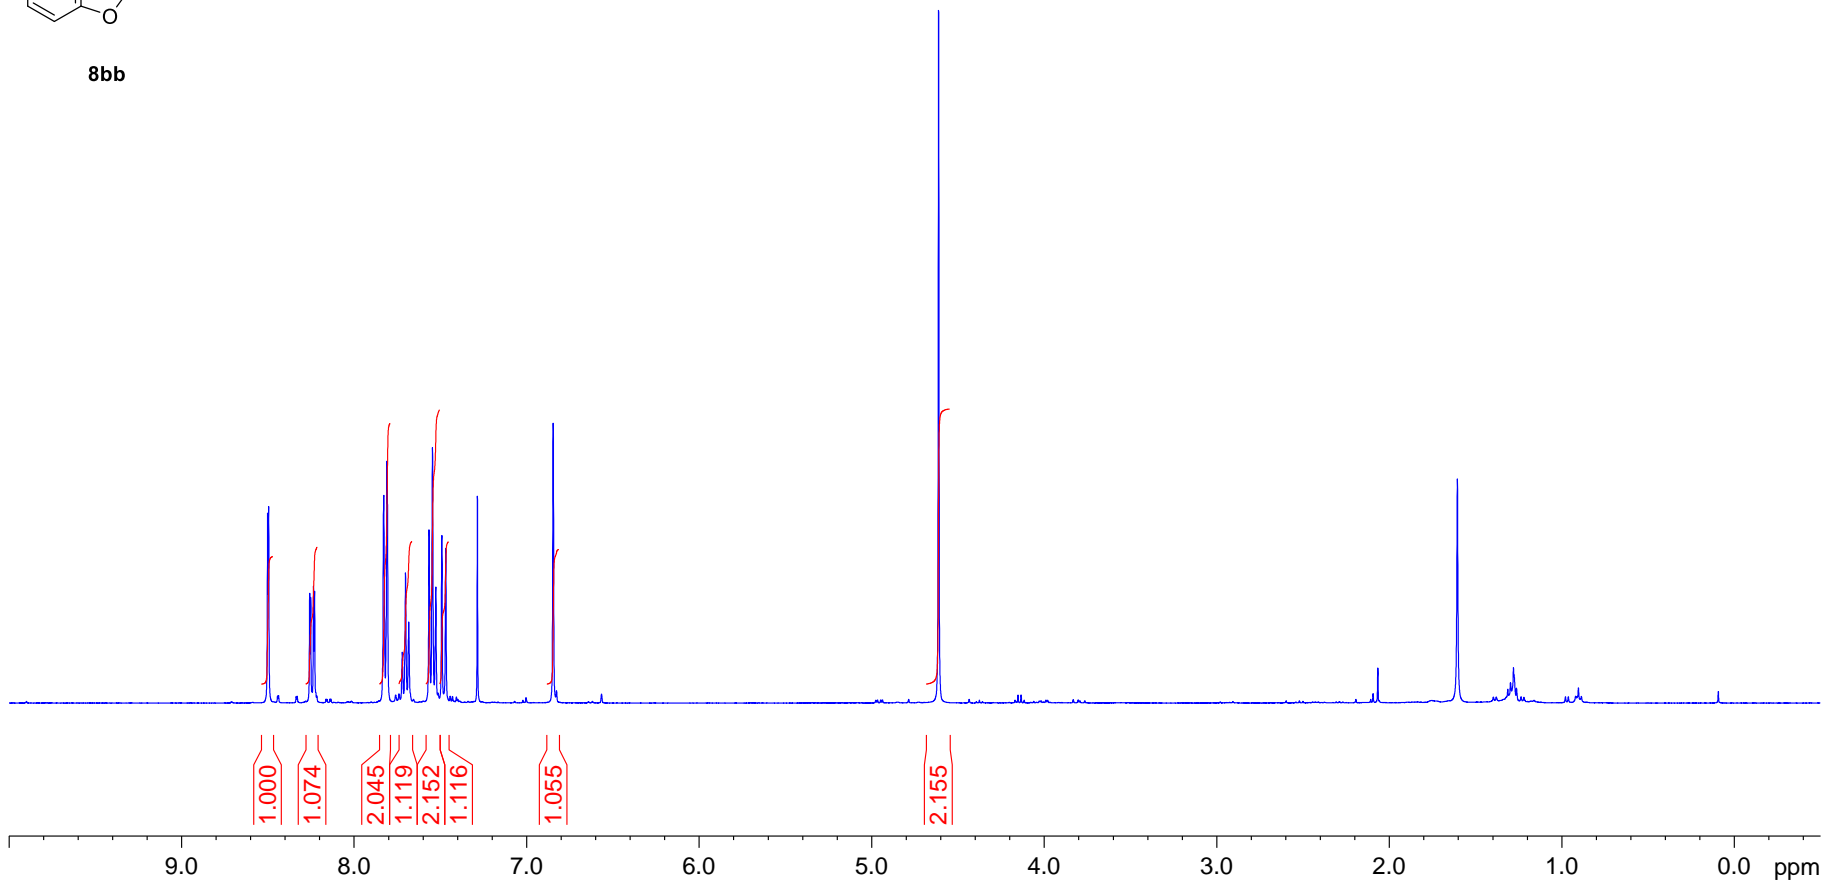



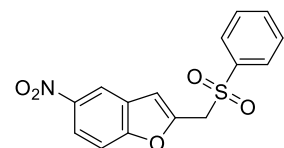

8bb

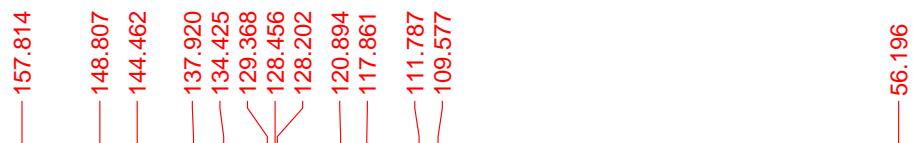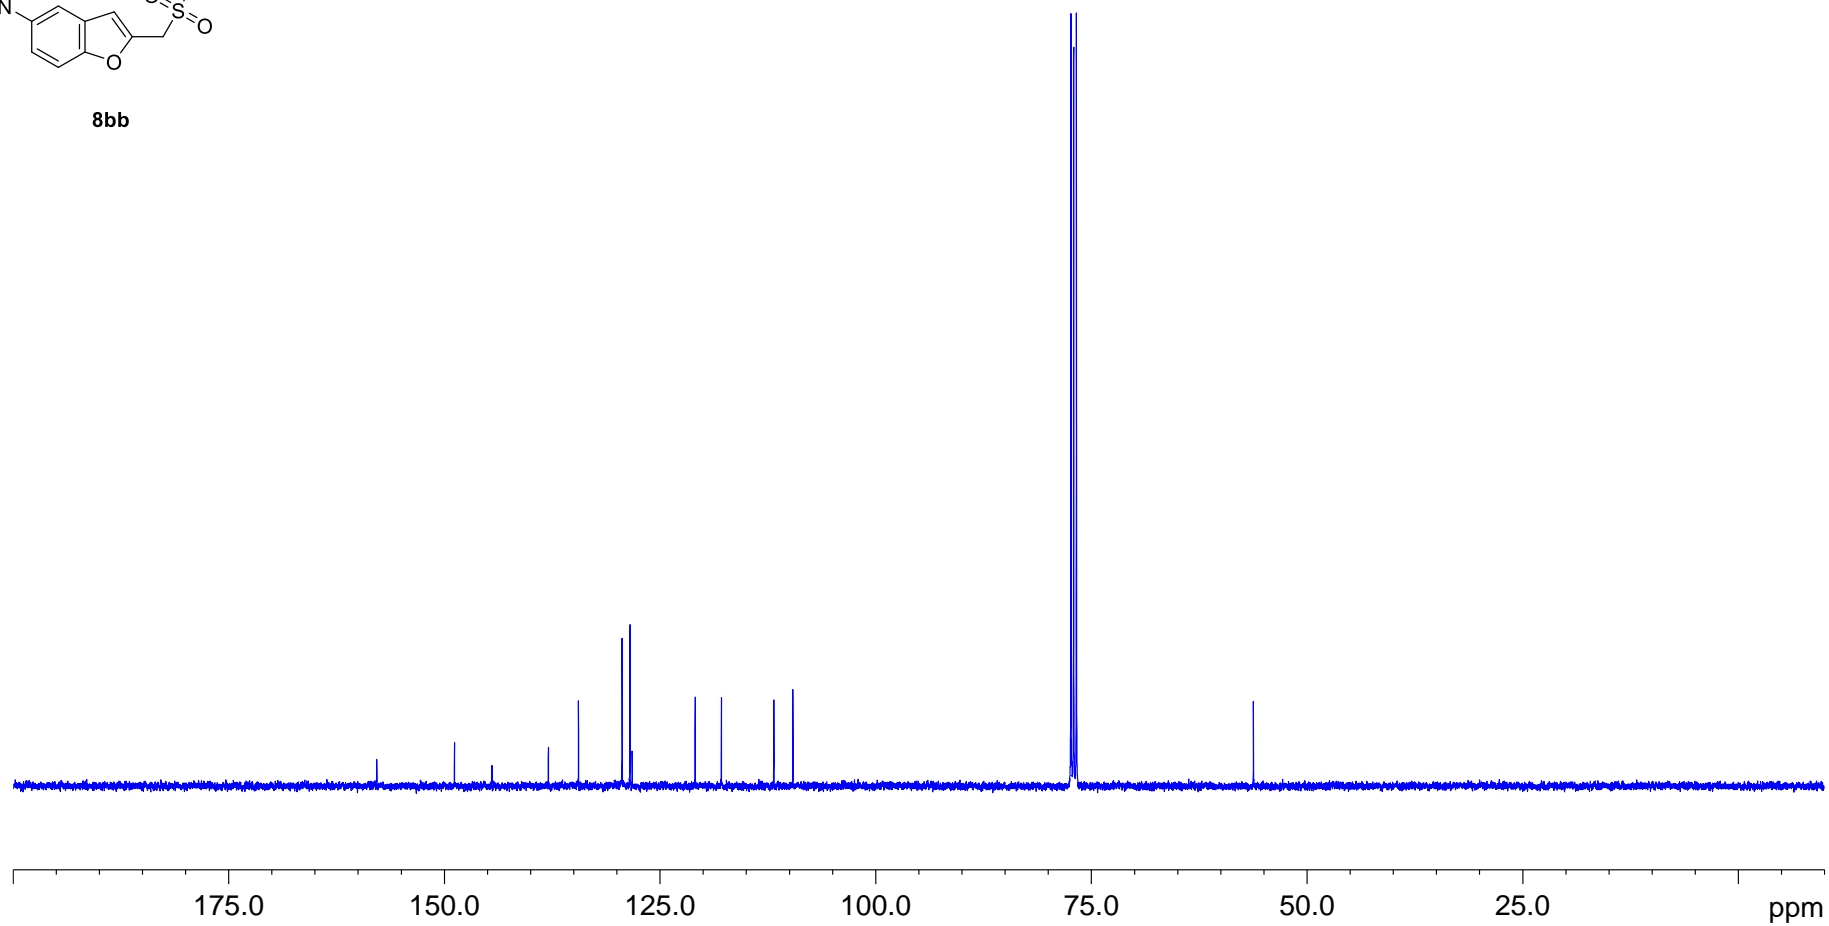

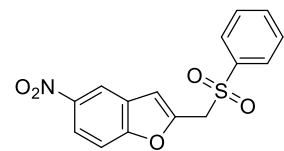

8bb

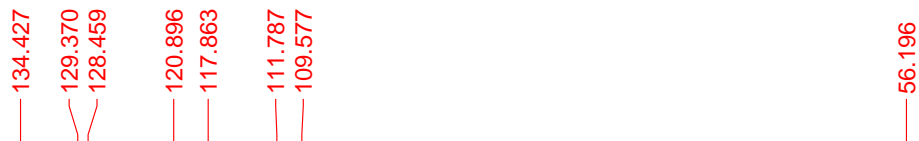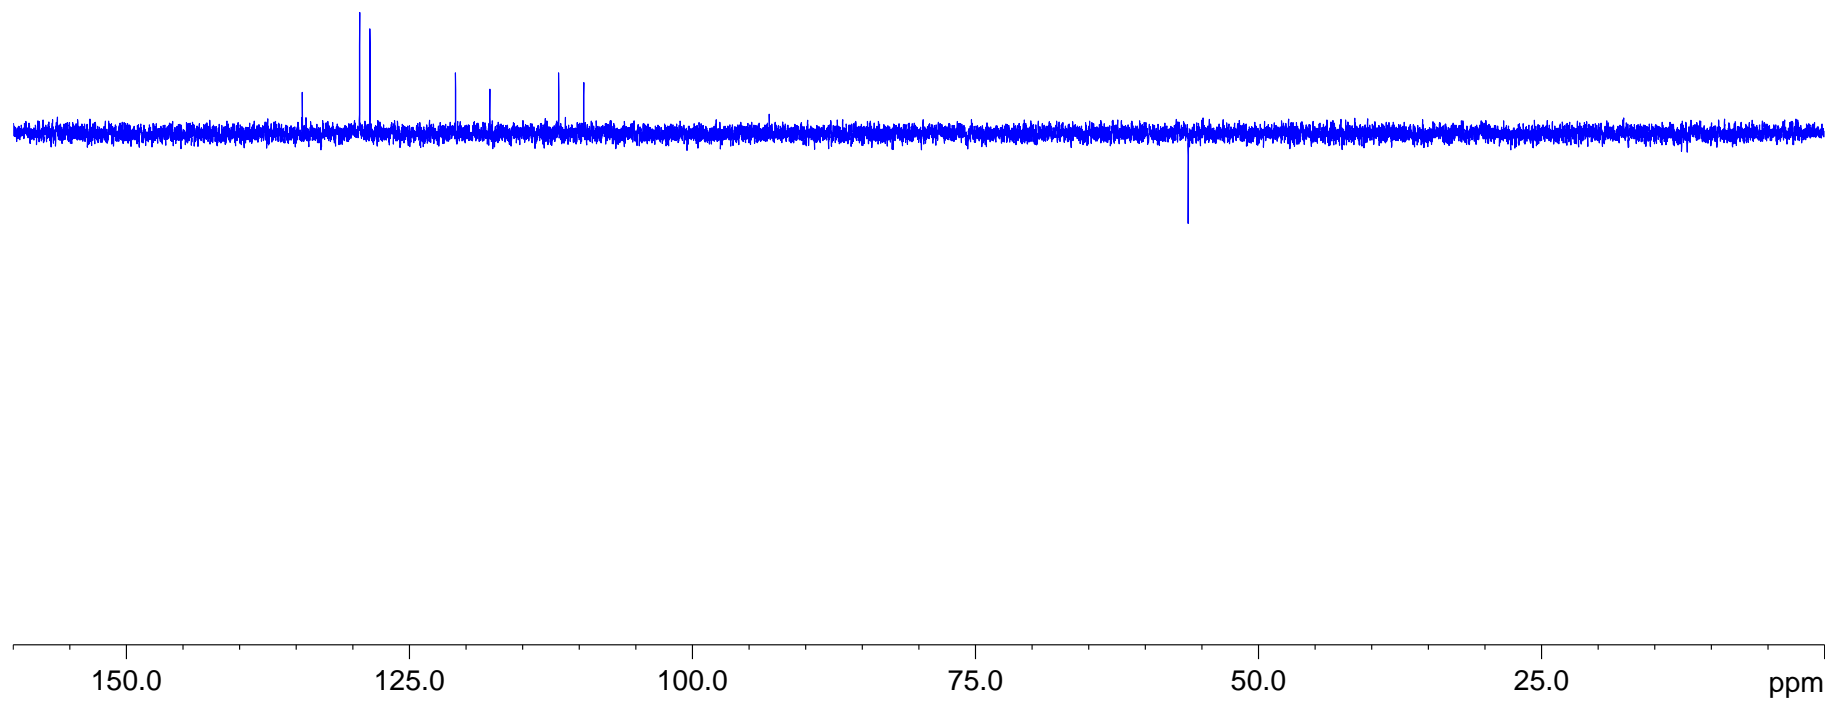

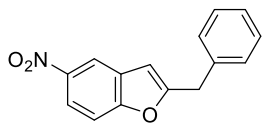

8'bb

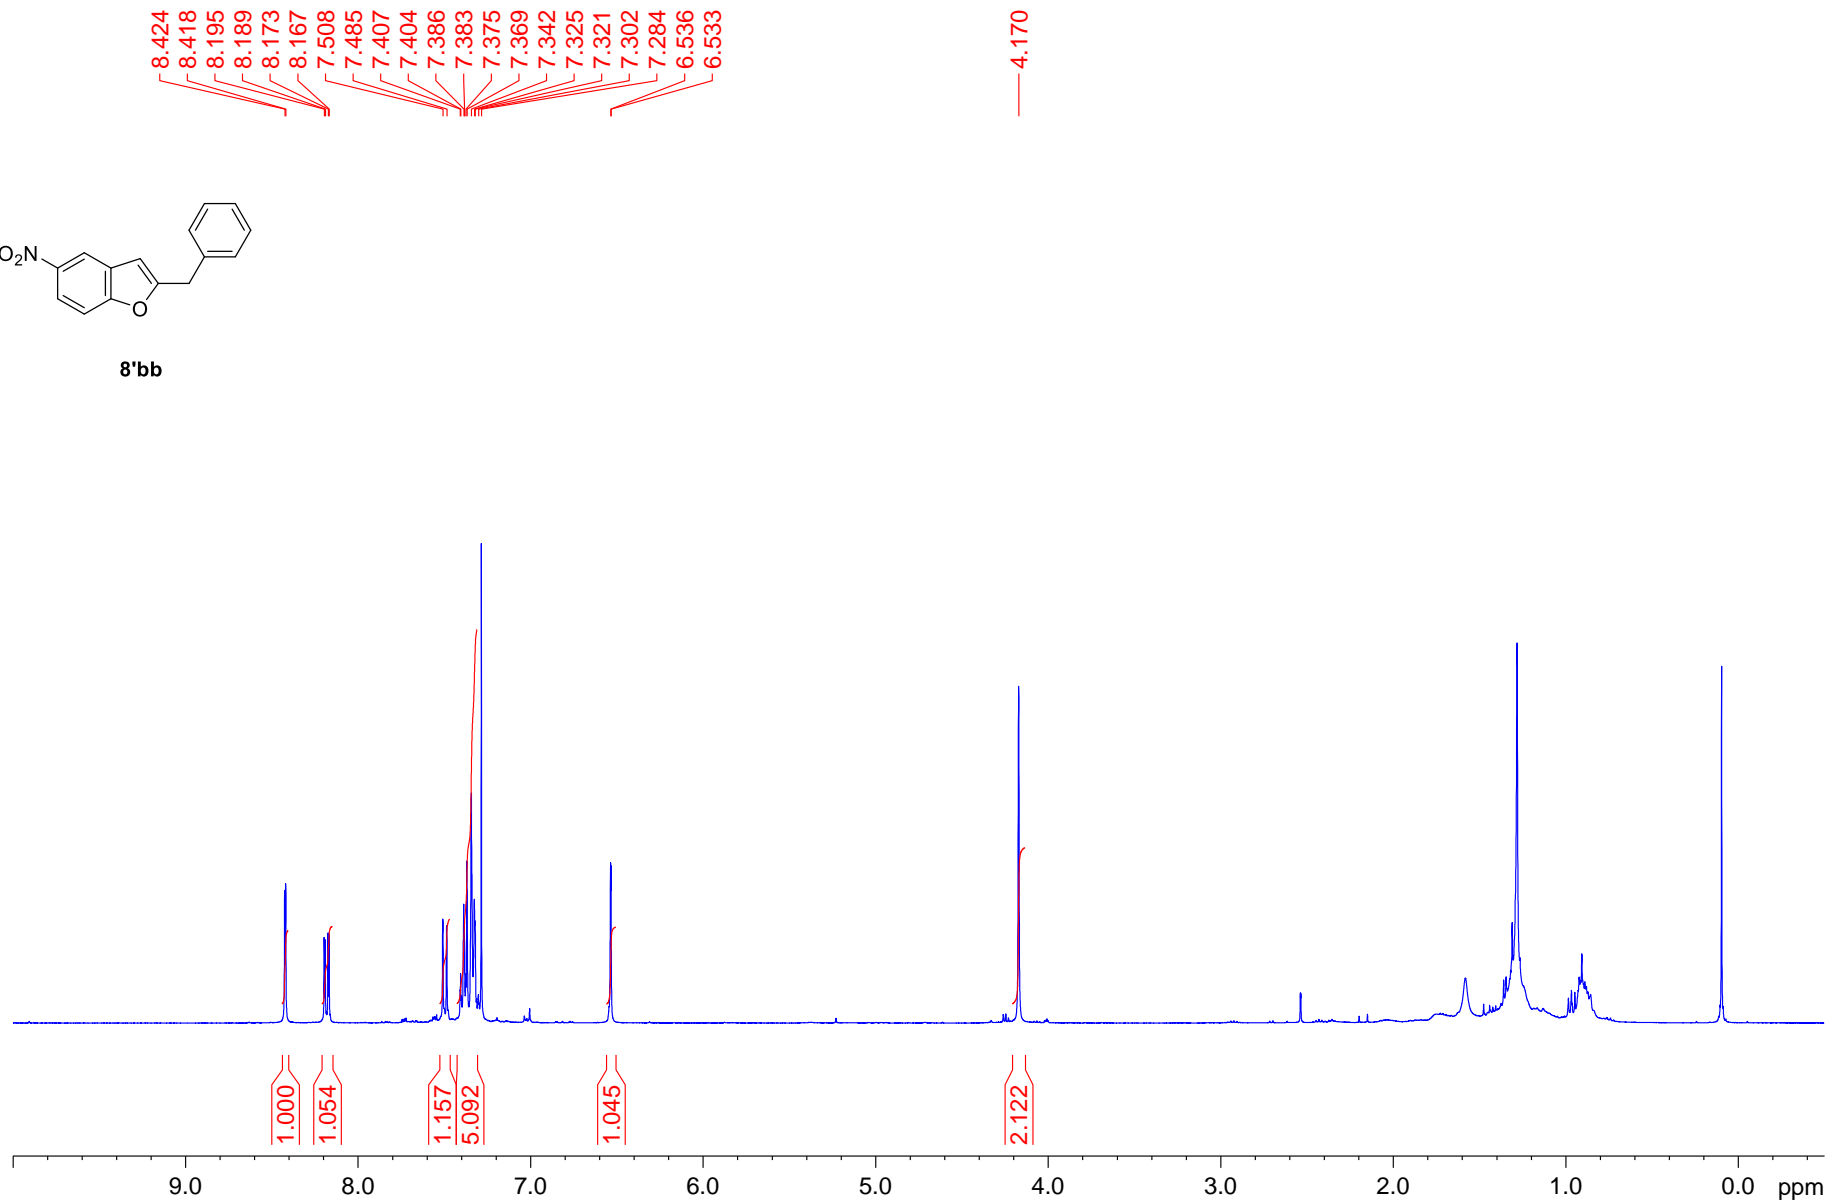



8'bb

161.525  
157.853  
144.065  
136.125  
129.207  
128.936  
128.835  
127.192  
119.546  
116.926  
111.193  
104.106

35.038  
29.711

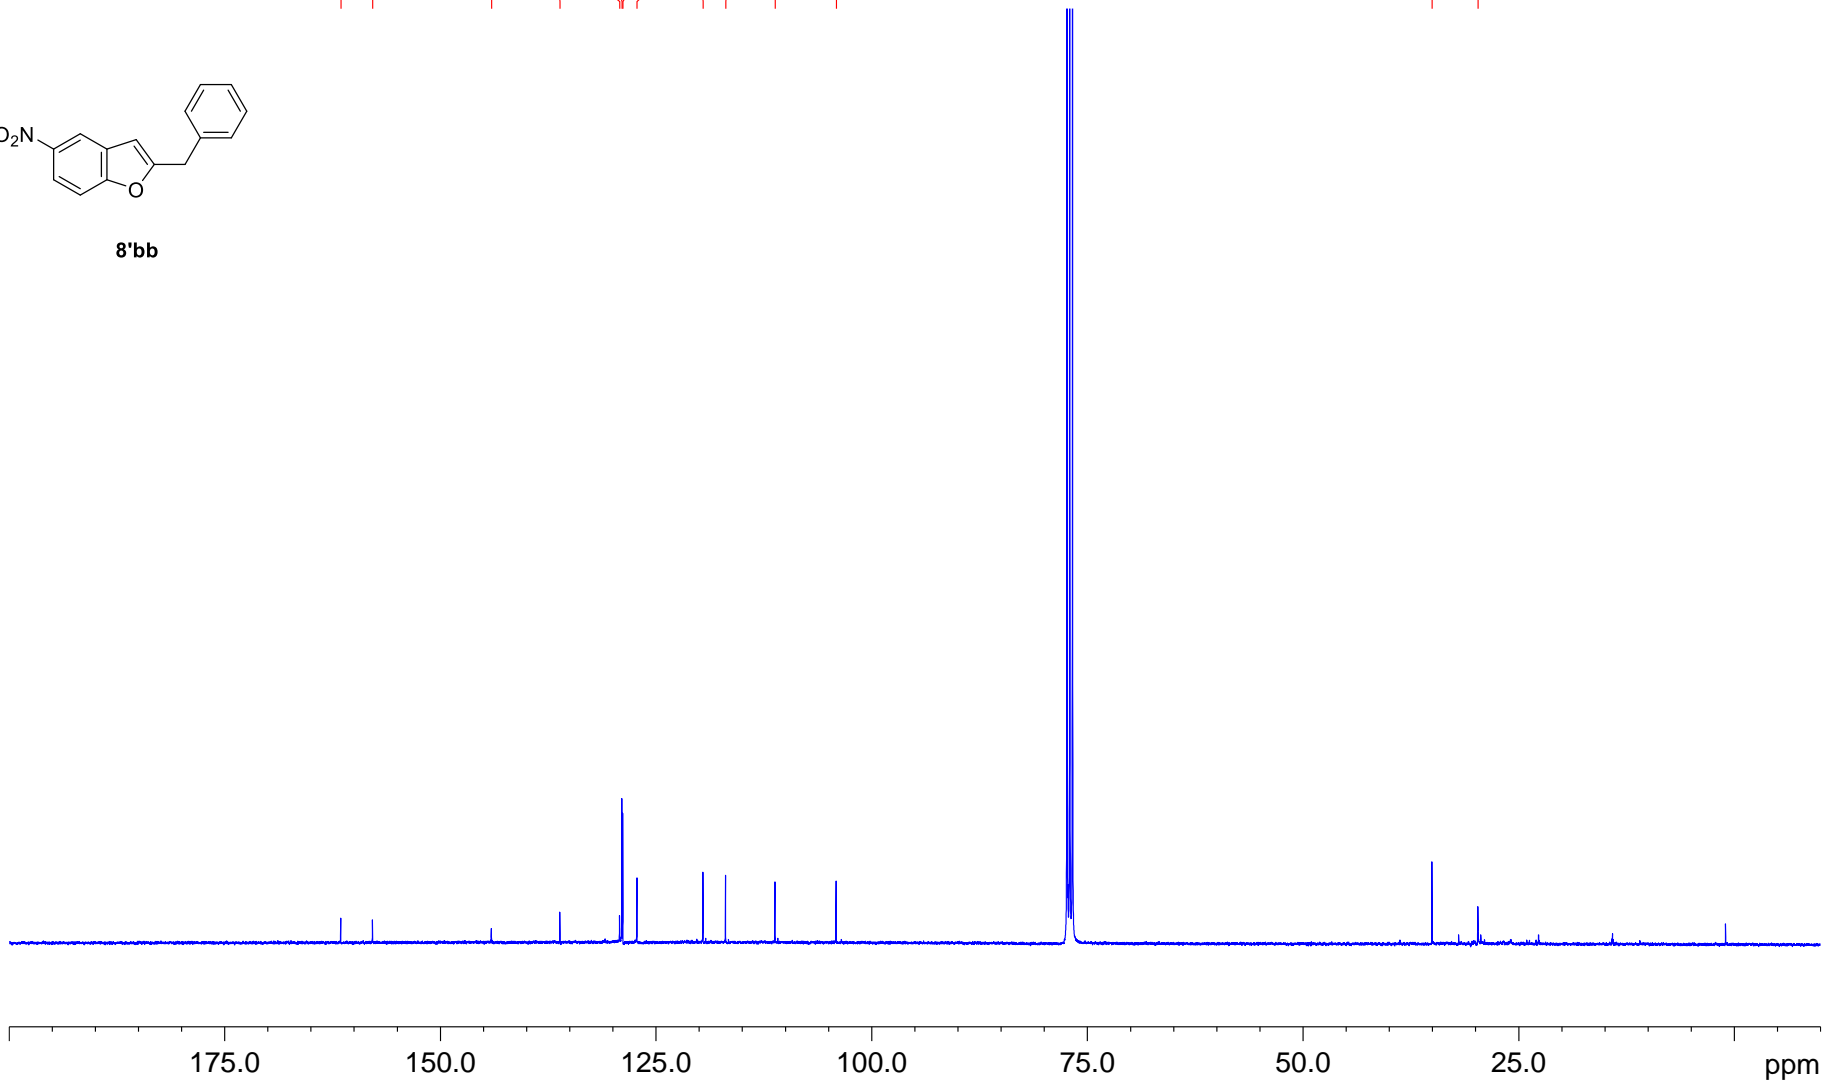



8'bb

128.936  
128.836  
127.191  
119.546  
116.925  
111.237  
104.107  
35.038

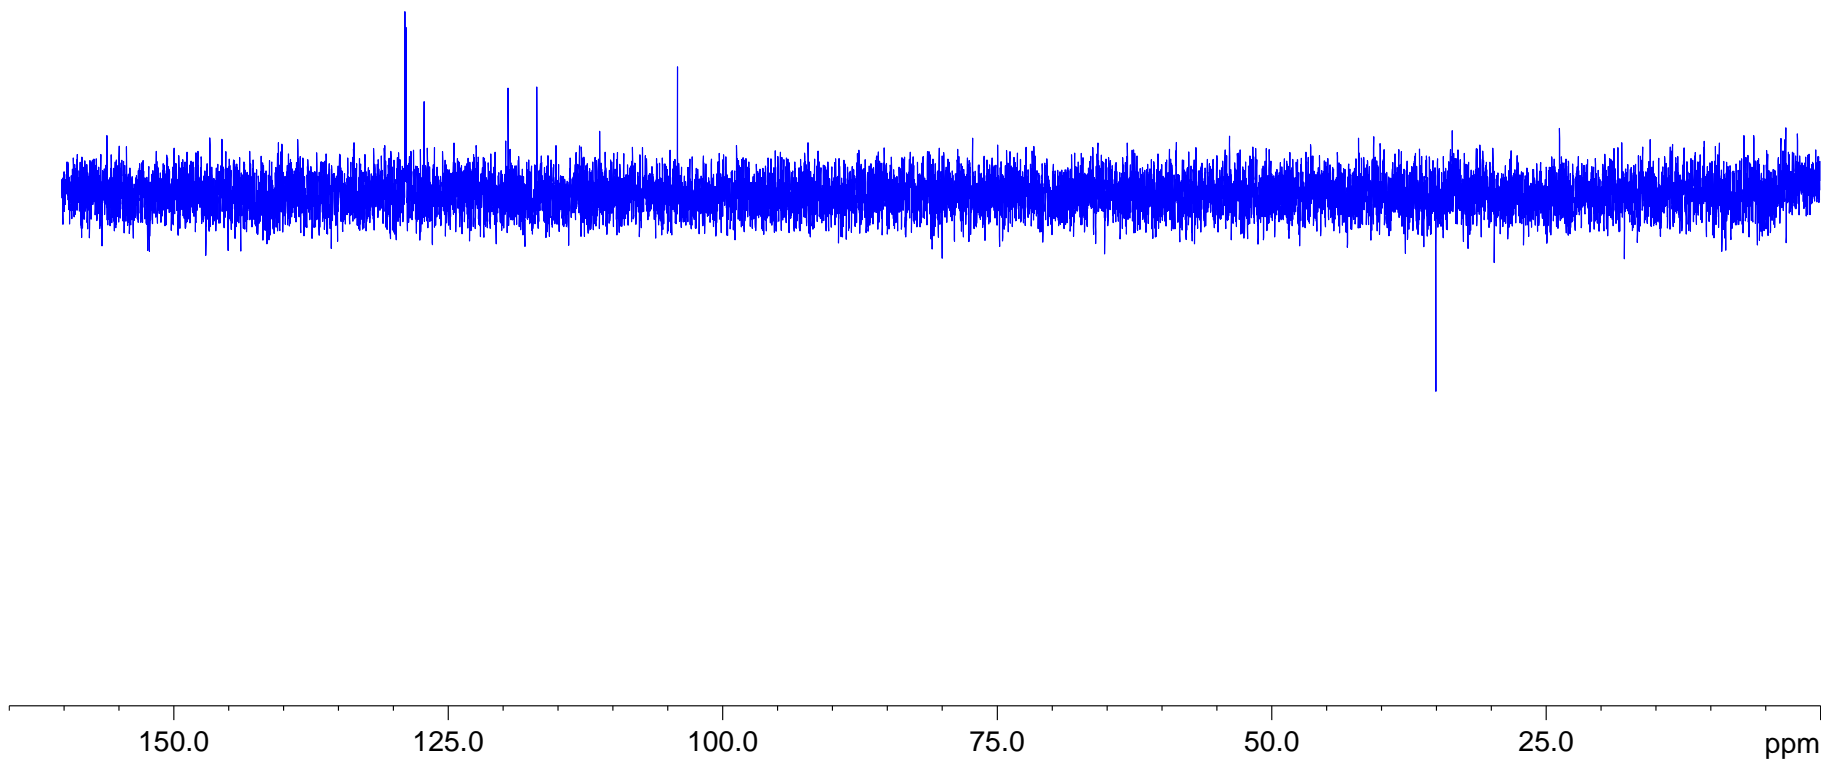

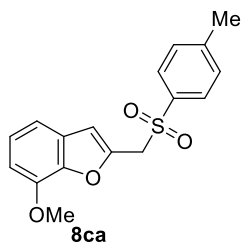

7.688  
7.668  
7.303  
7.284  
7.188  
7.169  
7.158  
7.152  
7.138  
6.816  
6.810  
6.800  
6.794  
6.749

4.571

3.950

2.446

2.068

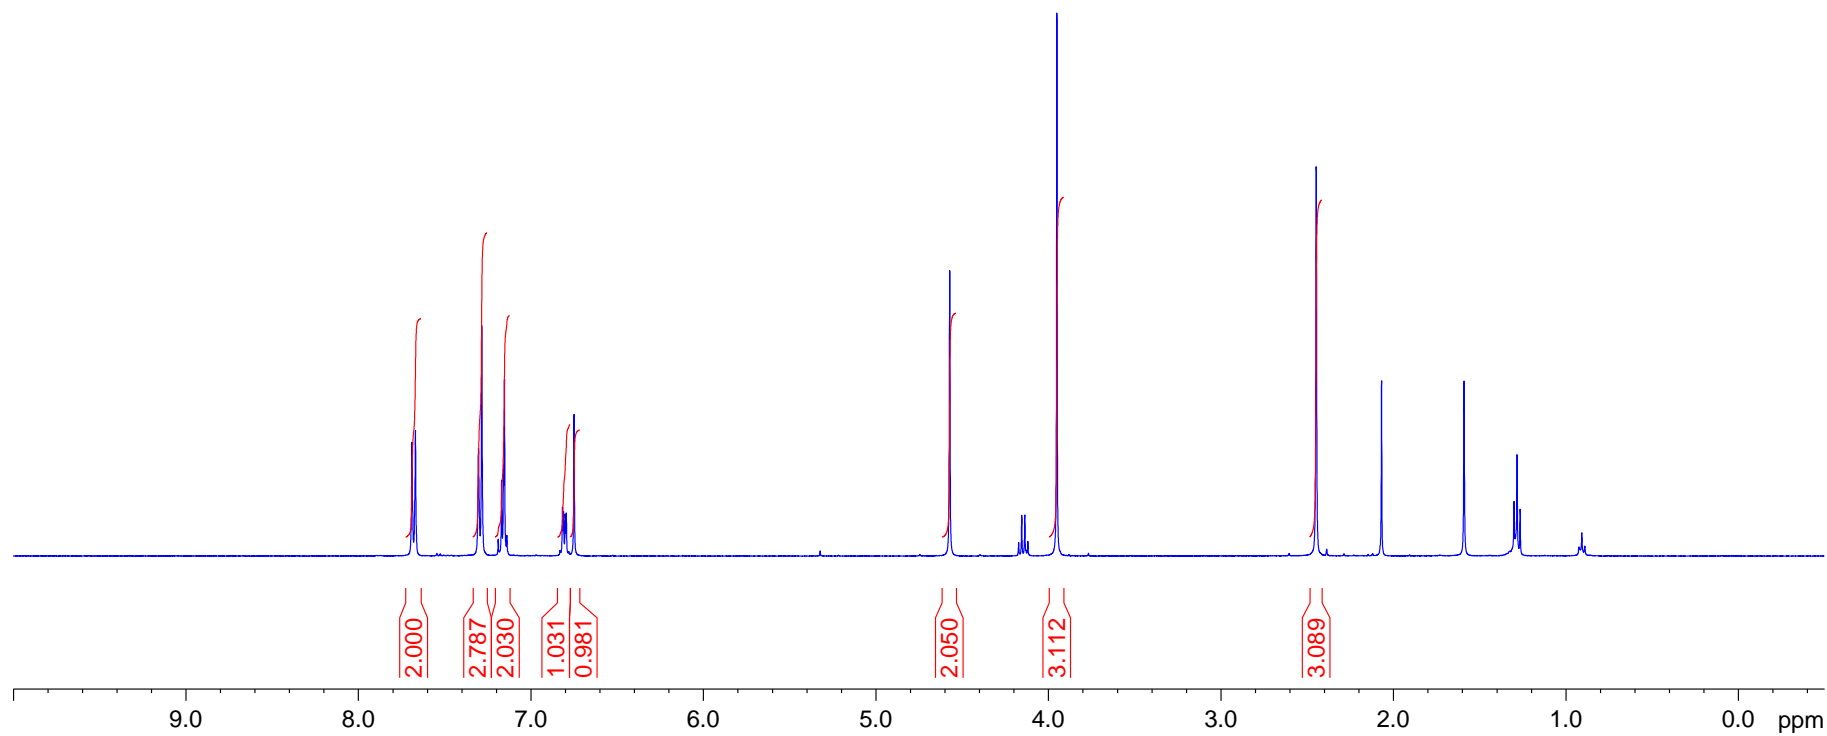

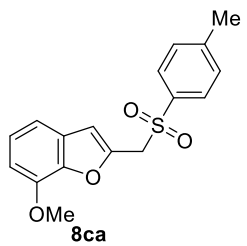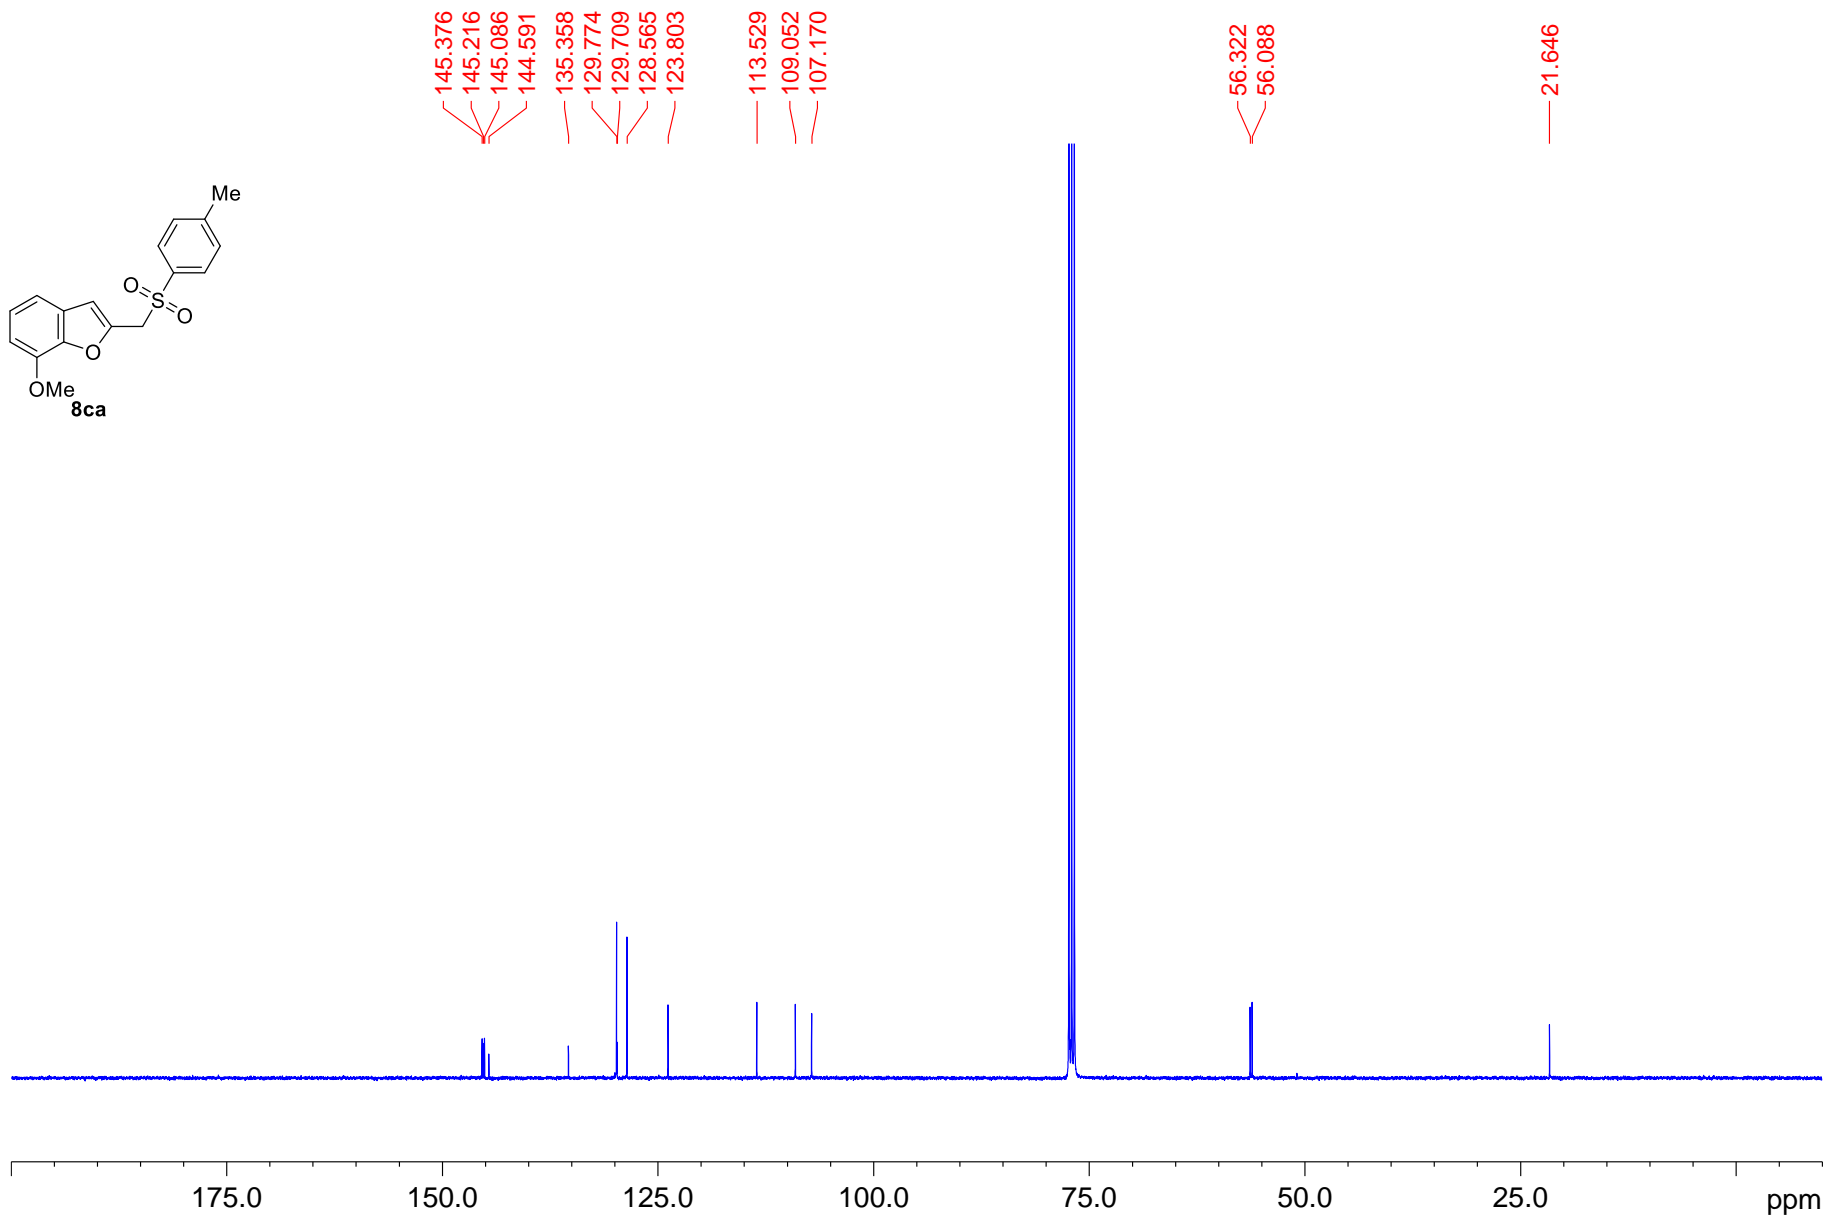

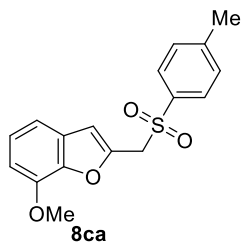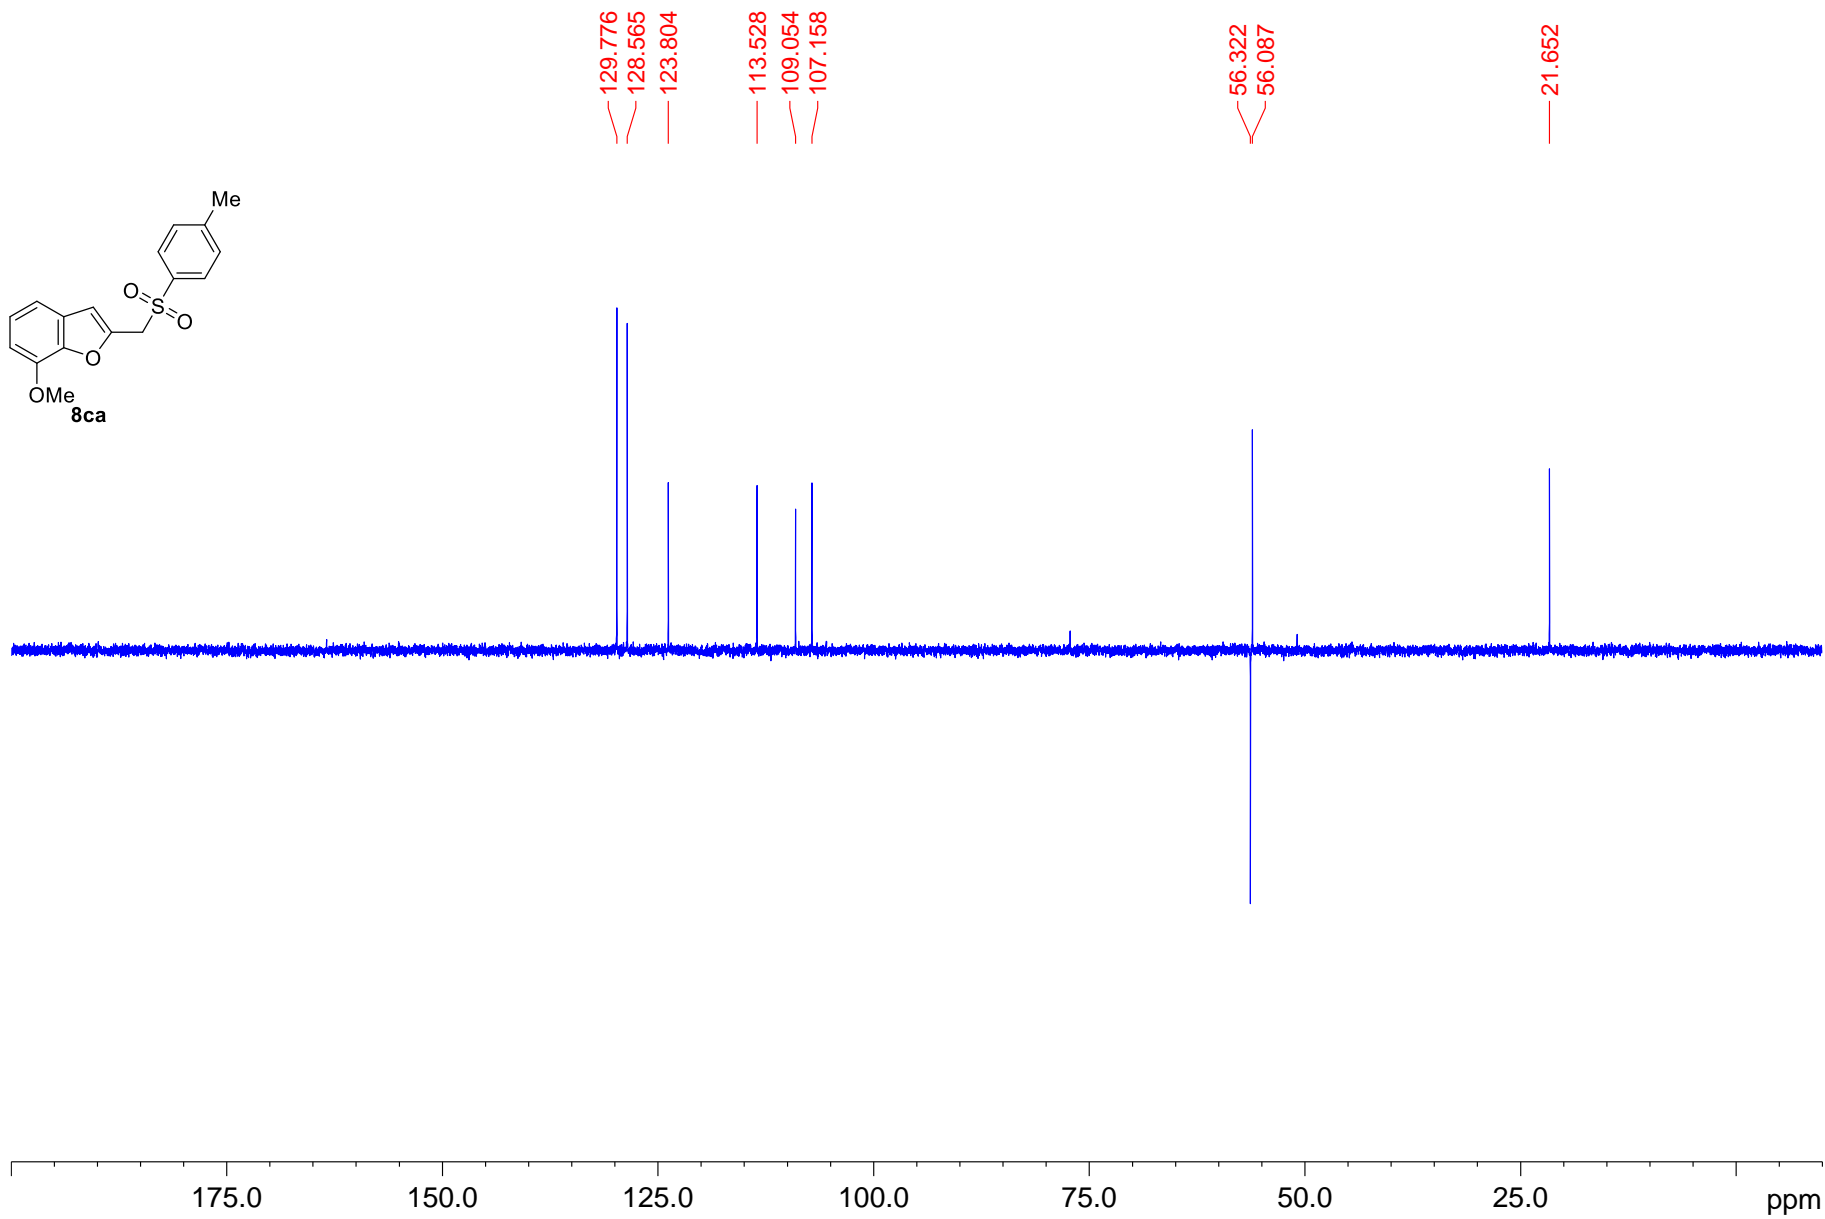



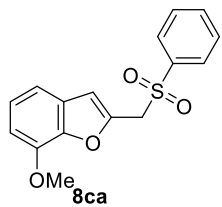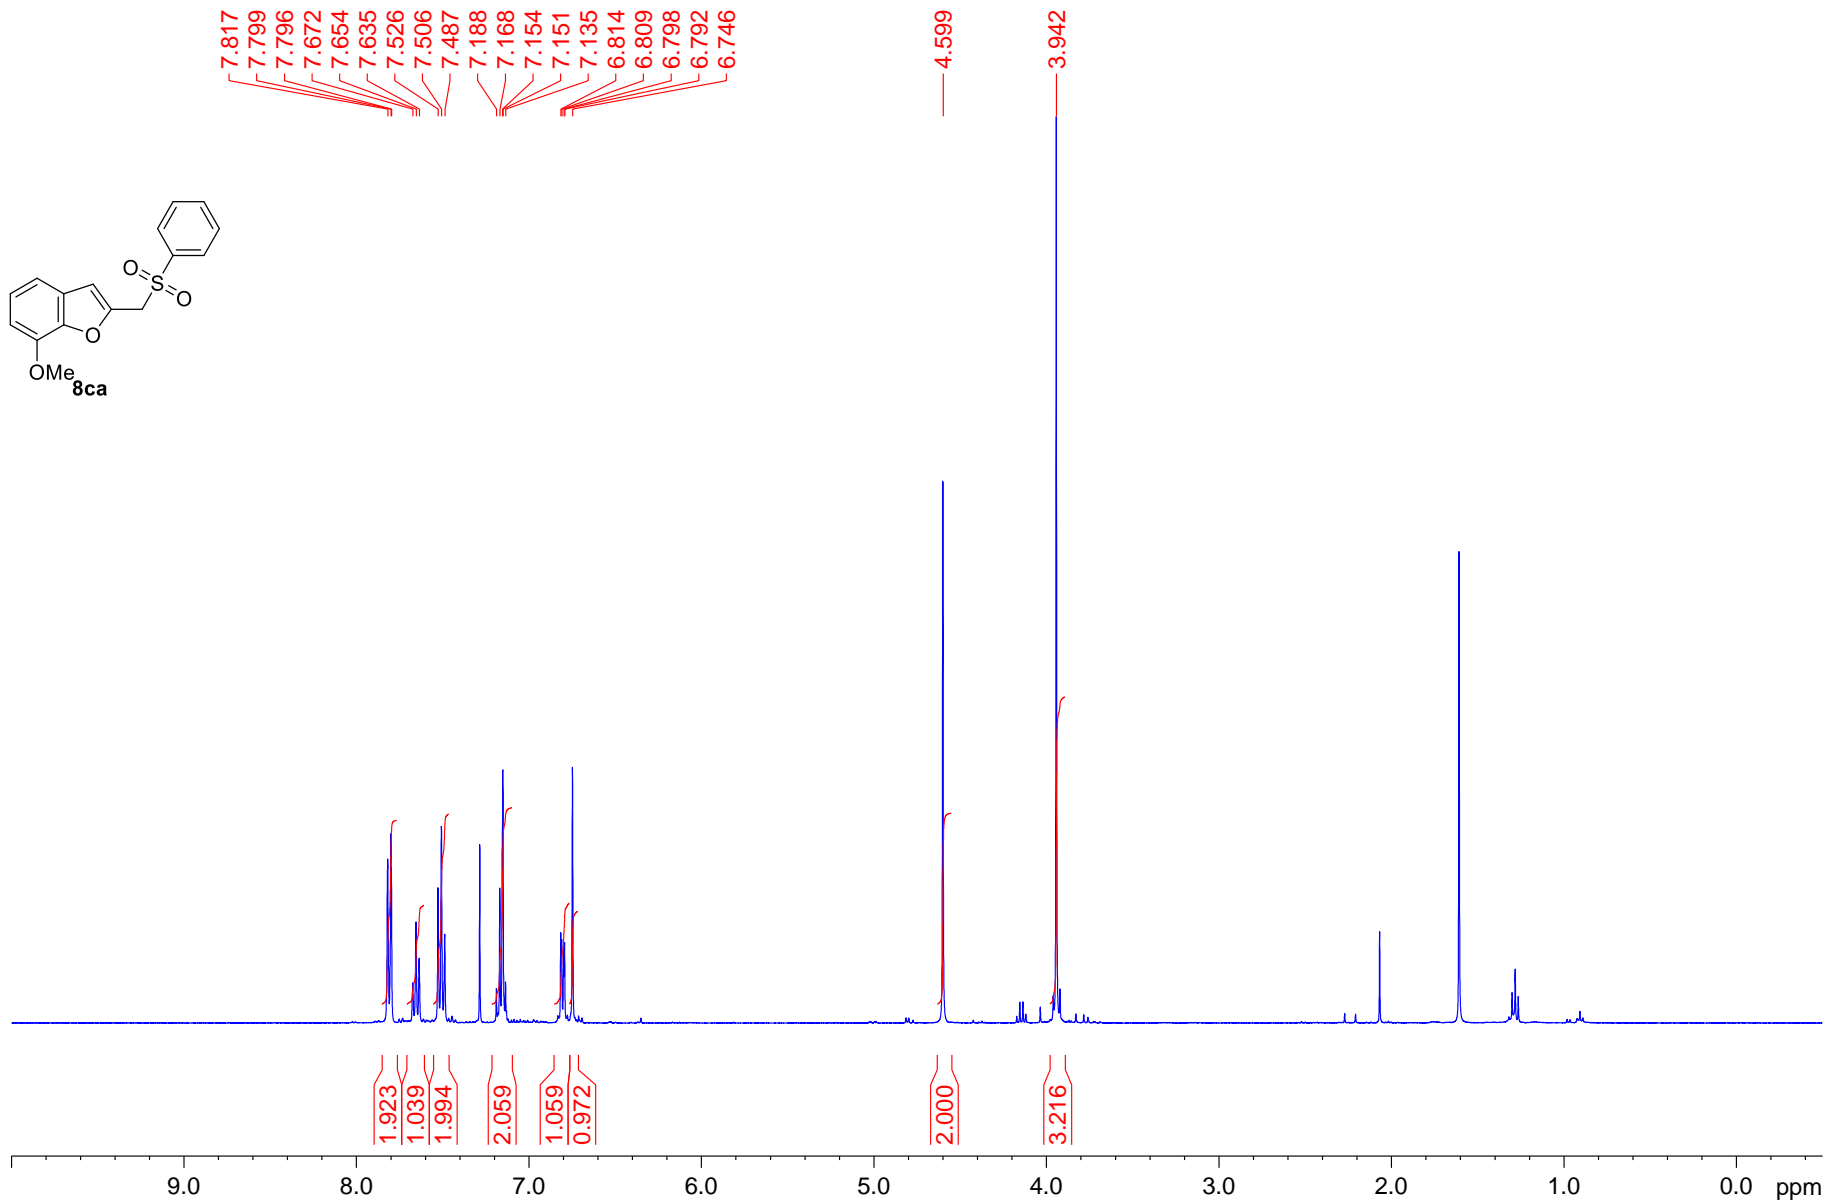

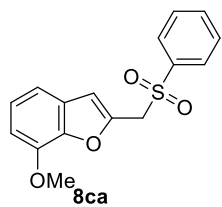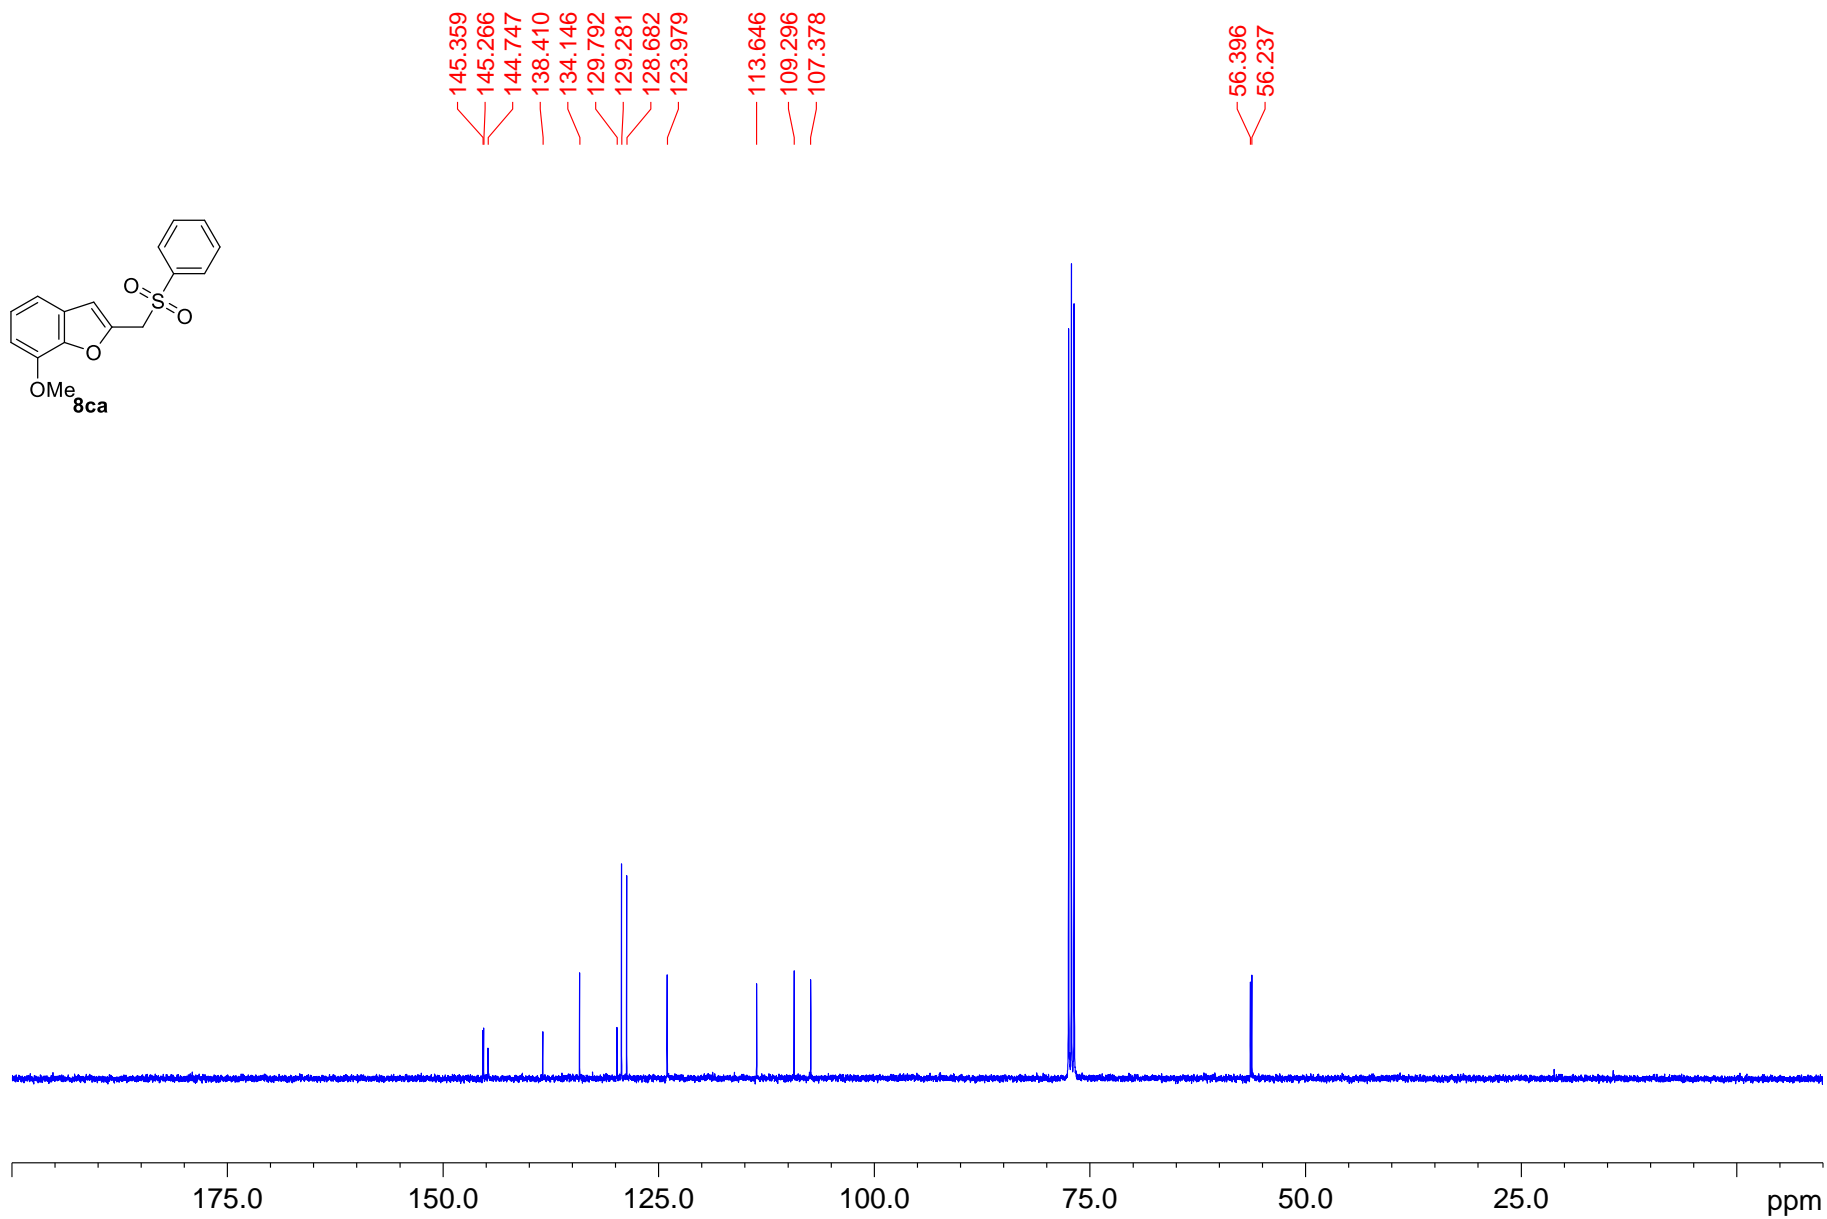

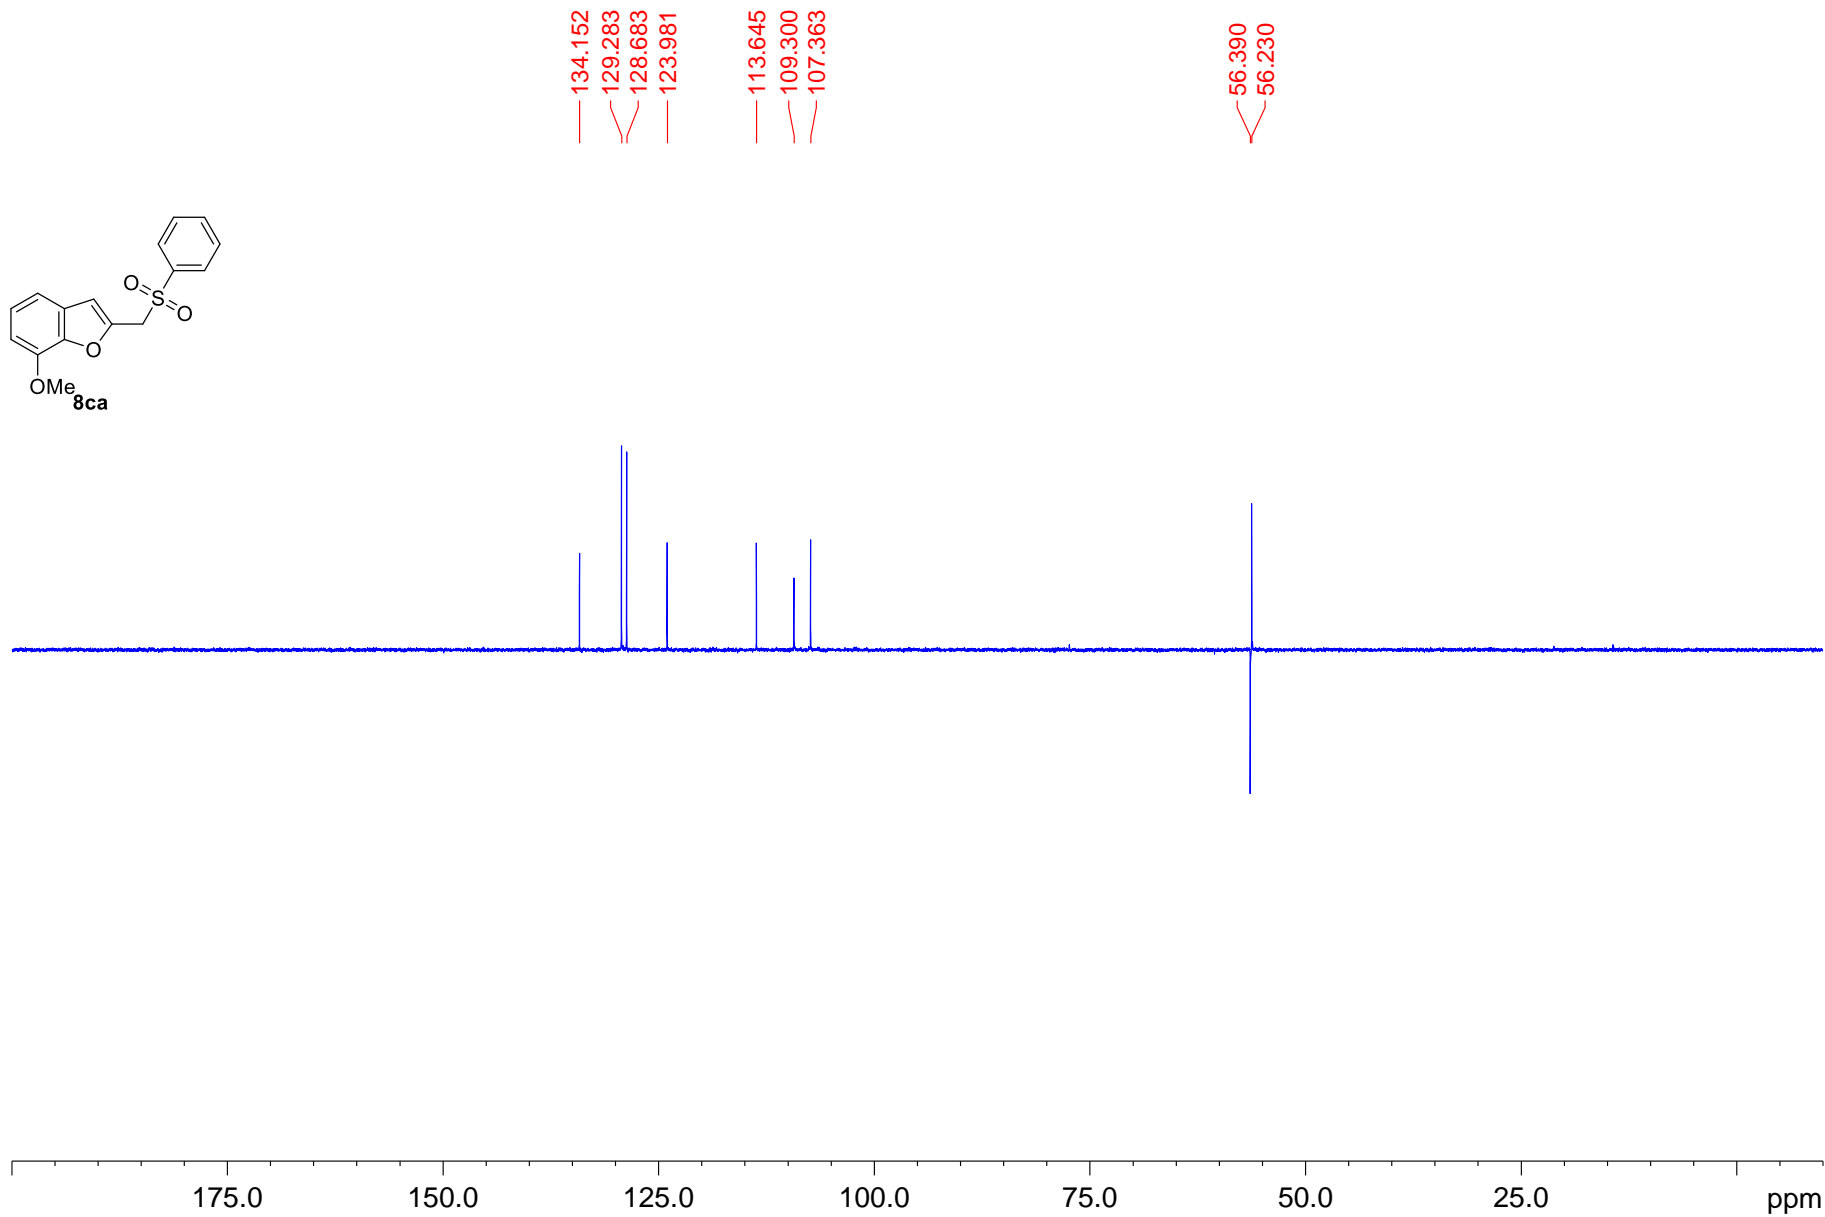

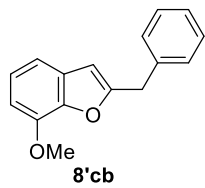

7.349  
7.340  
7.334  
7.324  
7.320  
7.296  
7.284  
7.274  
7.146  
7.127  
7.108  
7.098  
7.094  
7.078  
7.075  
6.781  
6.778  
6.762  
6.759  
6.341

4.157  
4.019

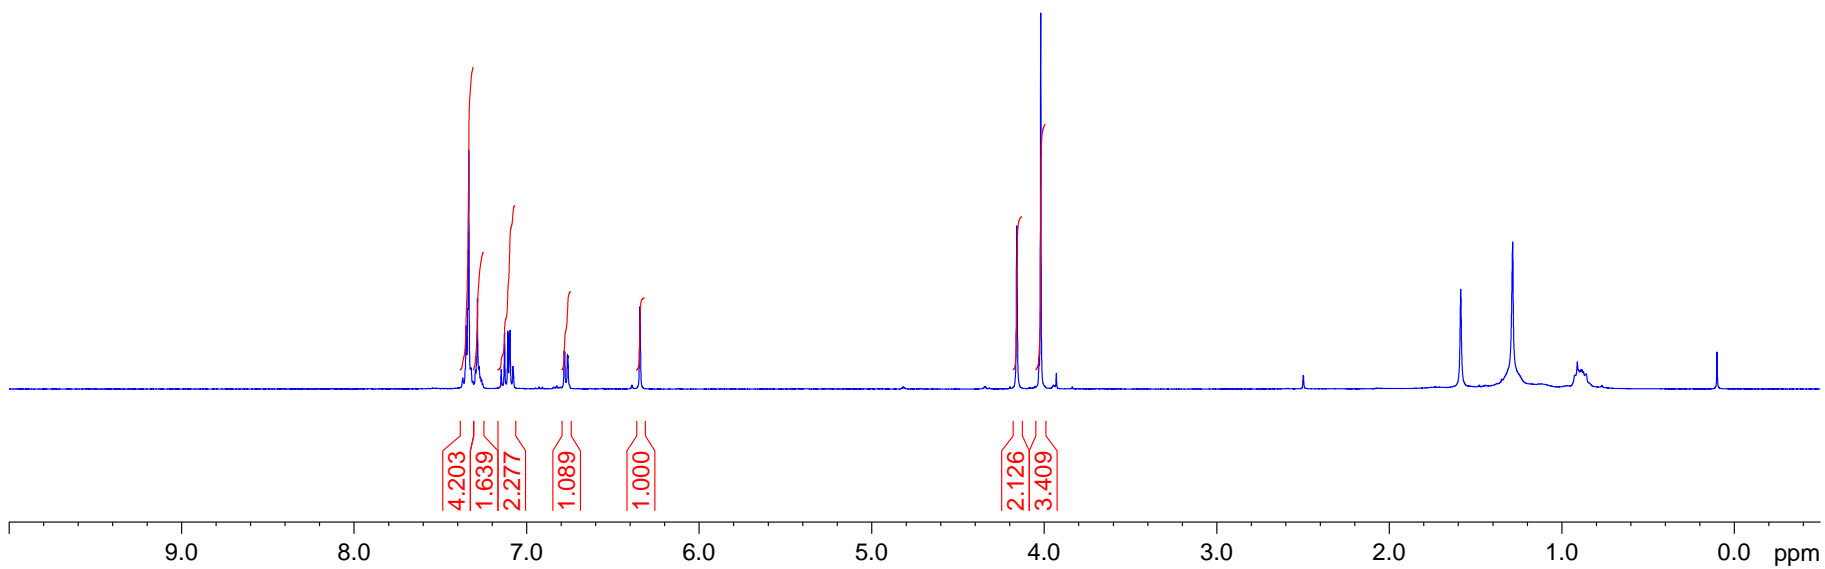

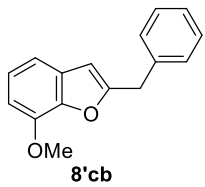

- 158.174
- 145.036
- 144.043
- 137.190
- 130.503
- 128.981
- 128.593
- 126.741
- 123.204
- 112.923
- 105.773
- 103.753
- 55.988
- 34.935

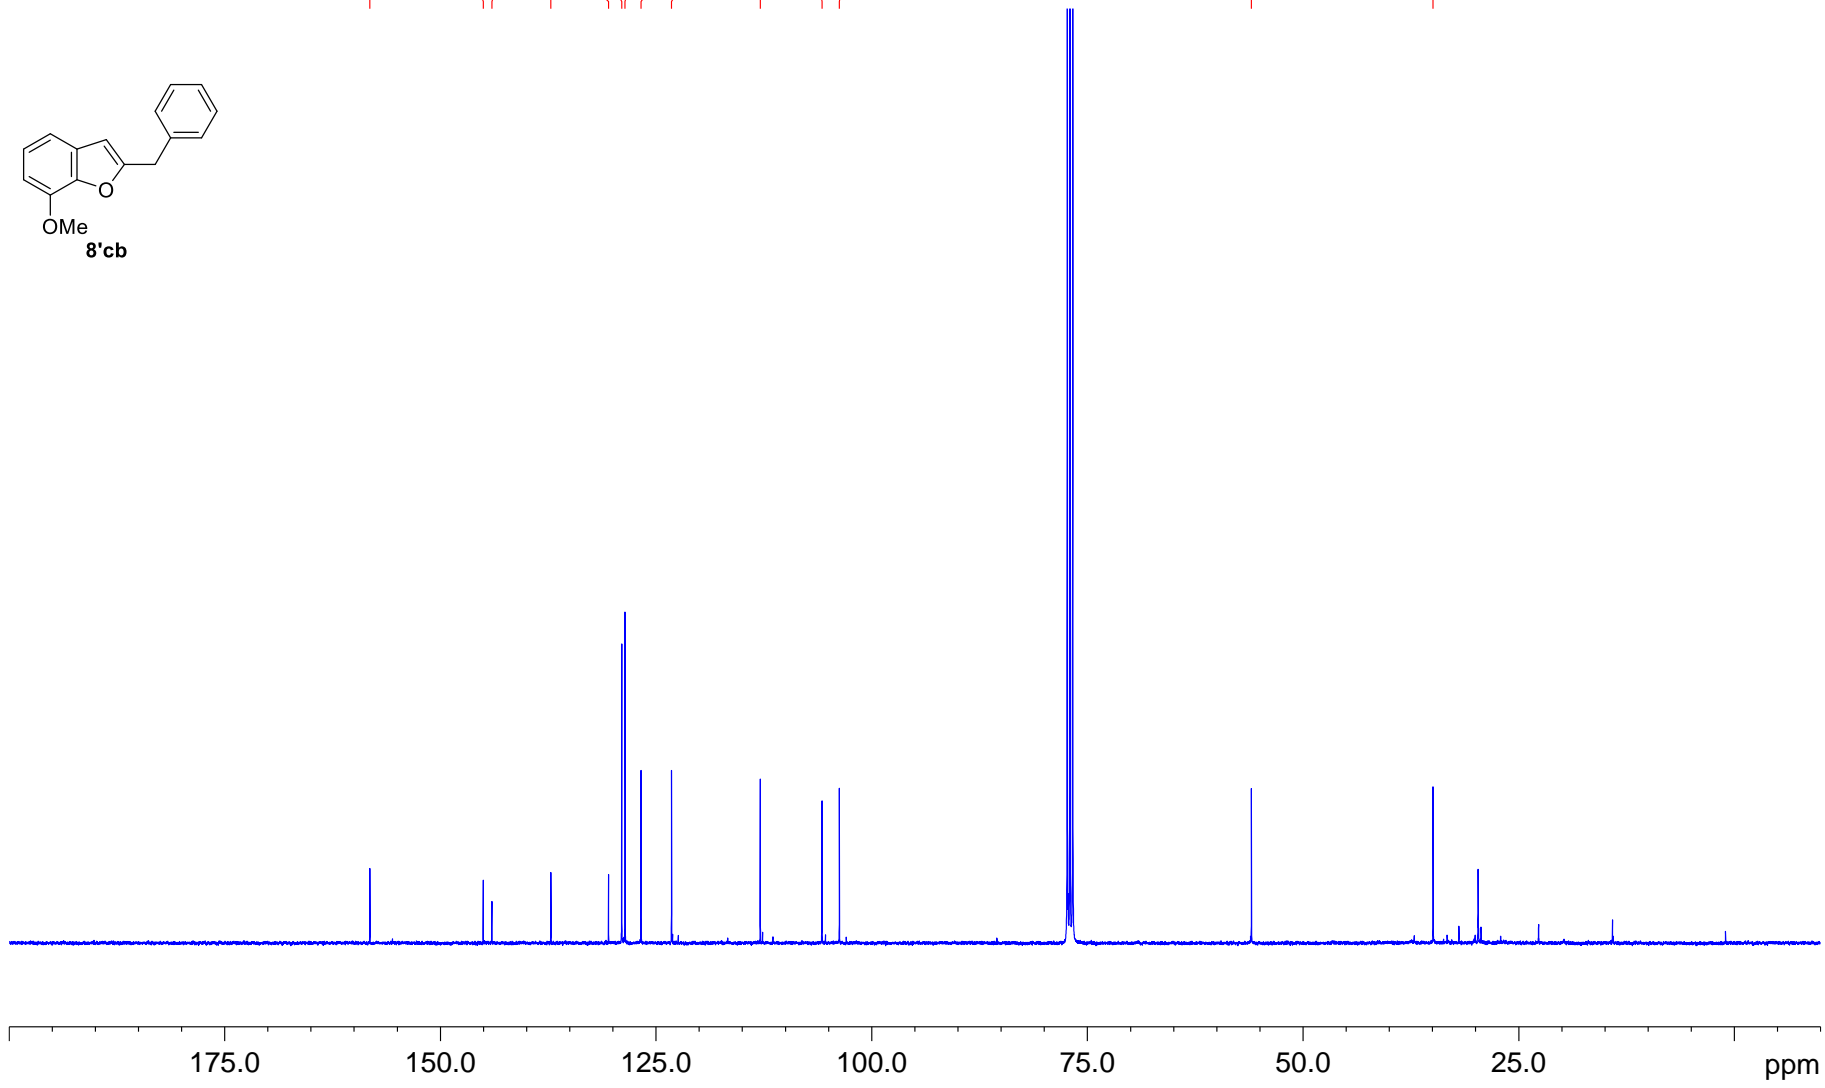

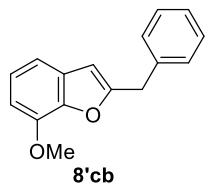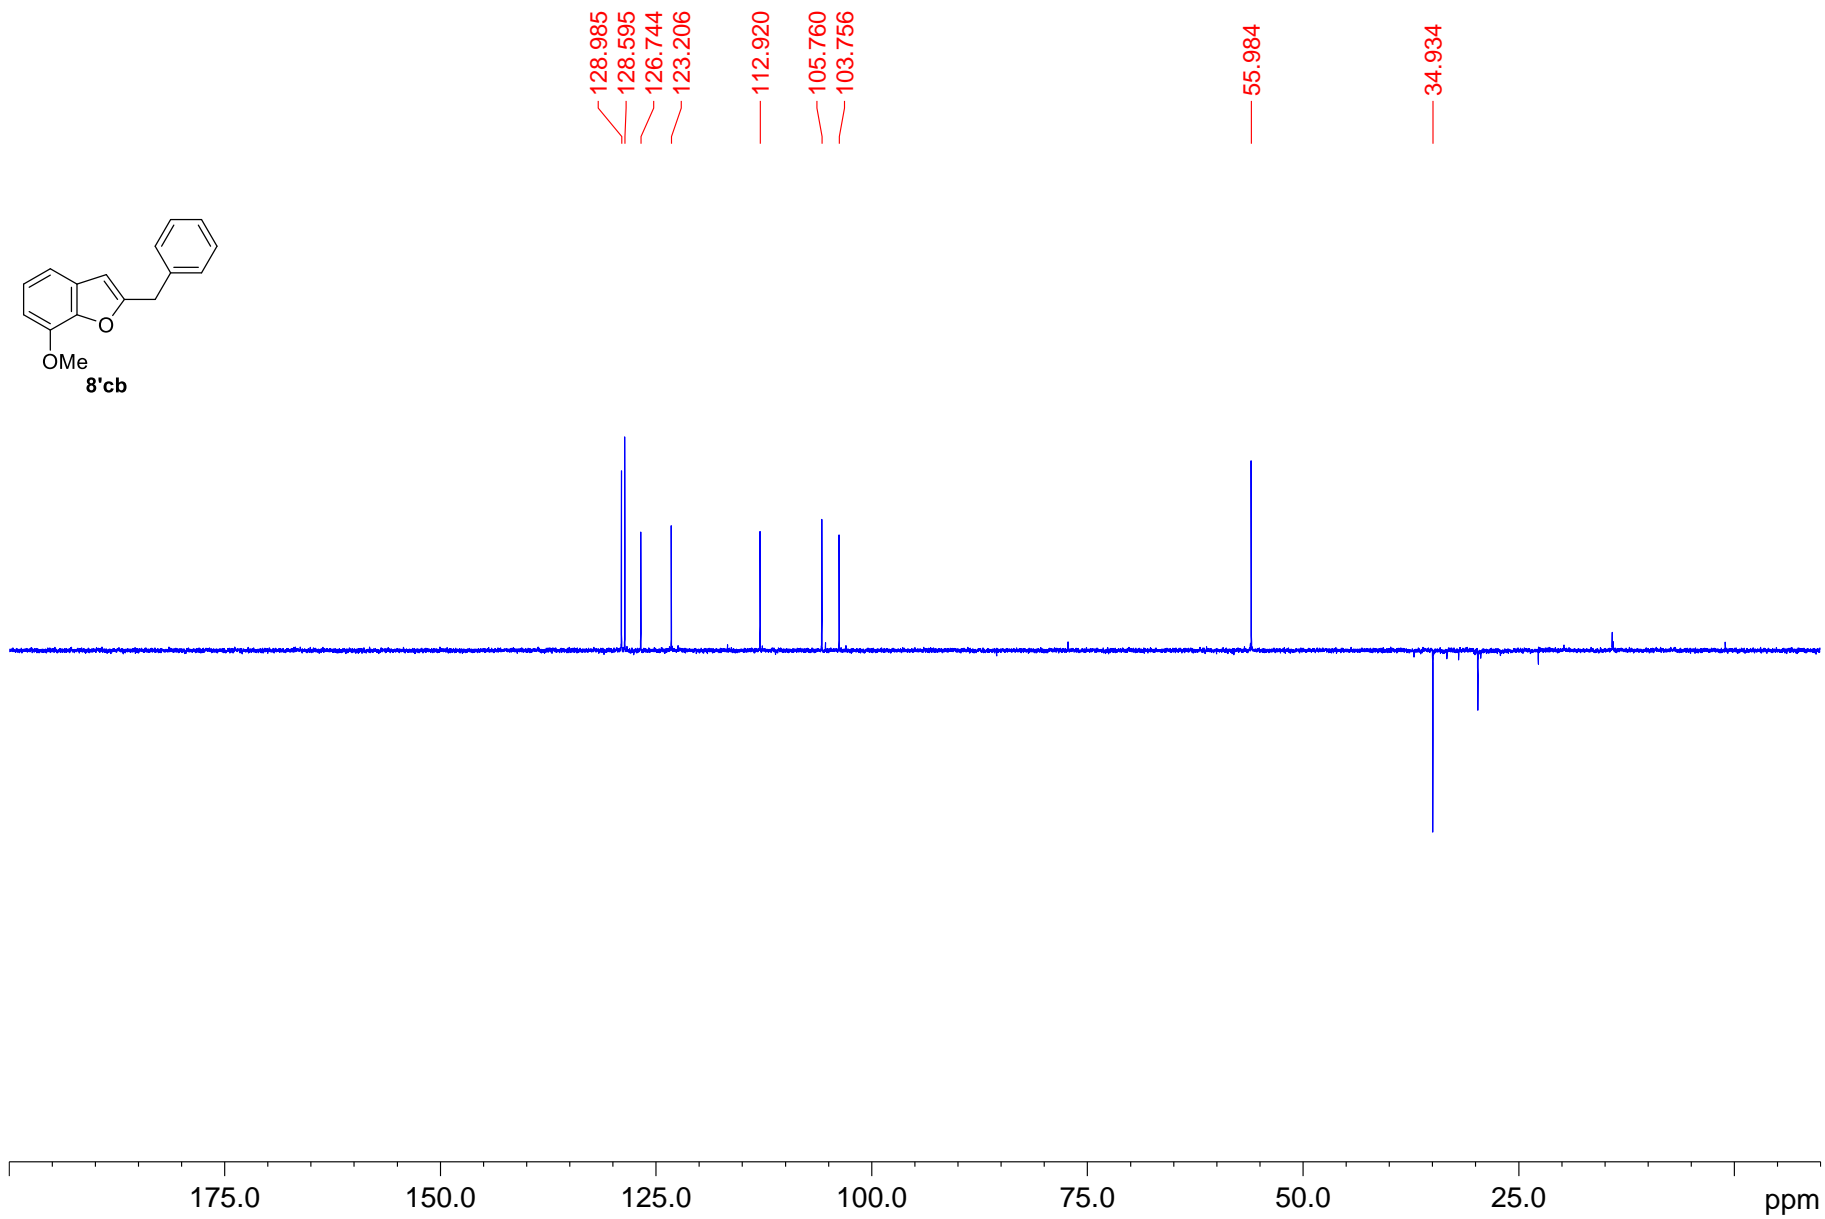

155.213  
154.425  
153.192  
152.442

128.054  
124.558  
122.877  
121.200  
116.253  
114.693  
111.415  
106.034

64.020

55.709

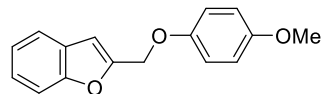

10aa

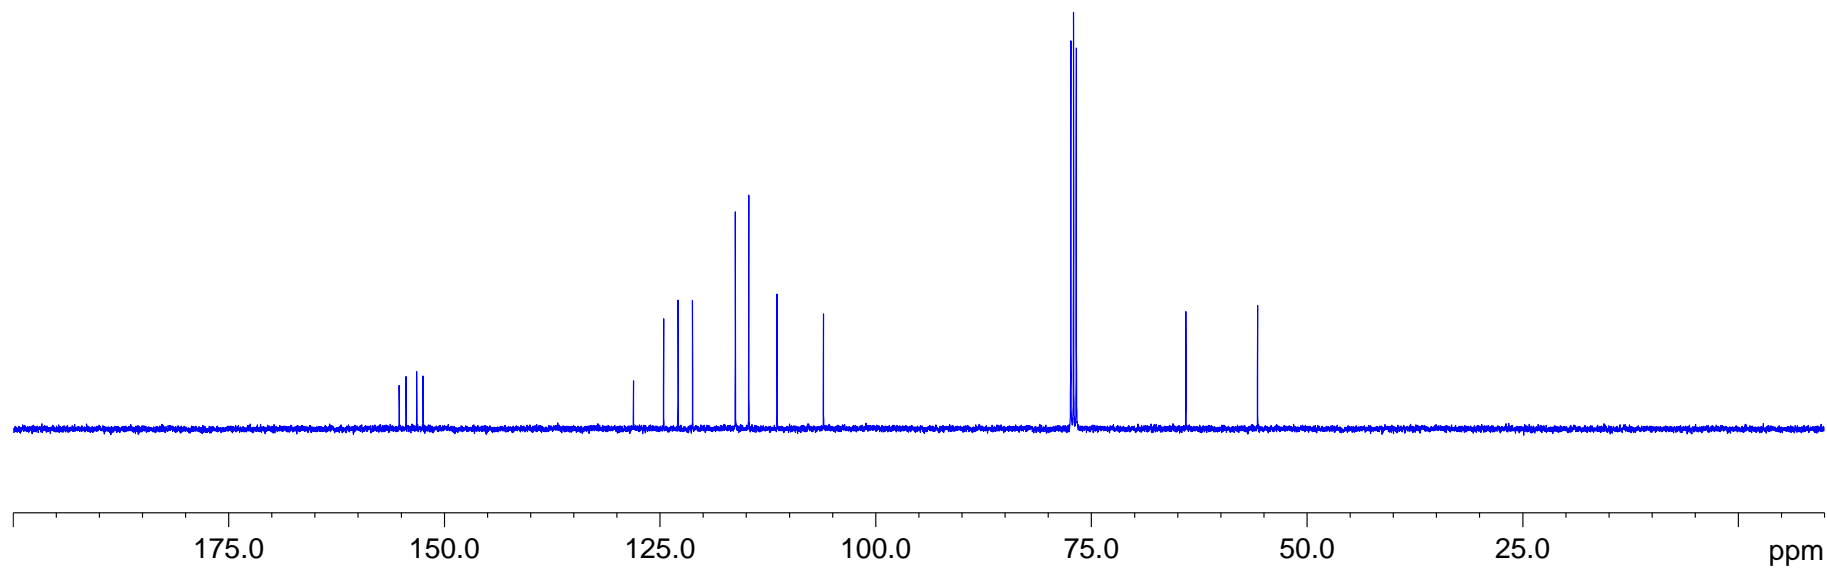

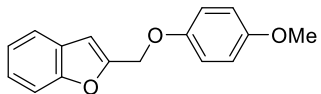

10aa

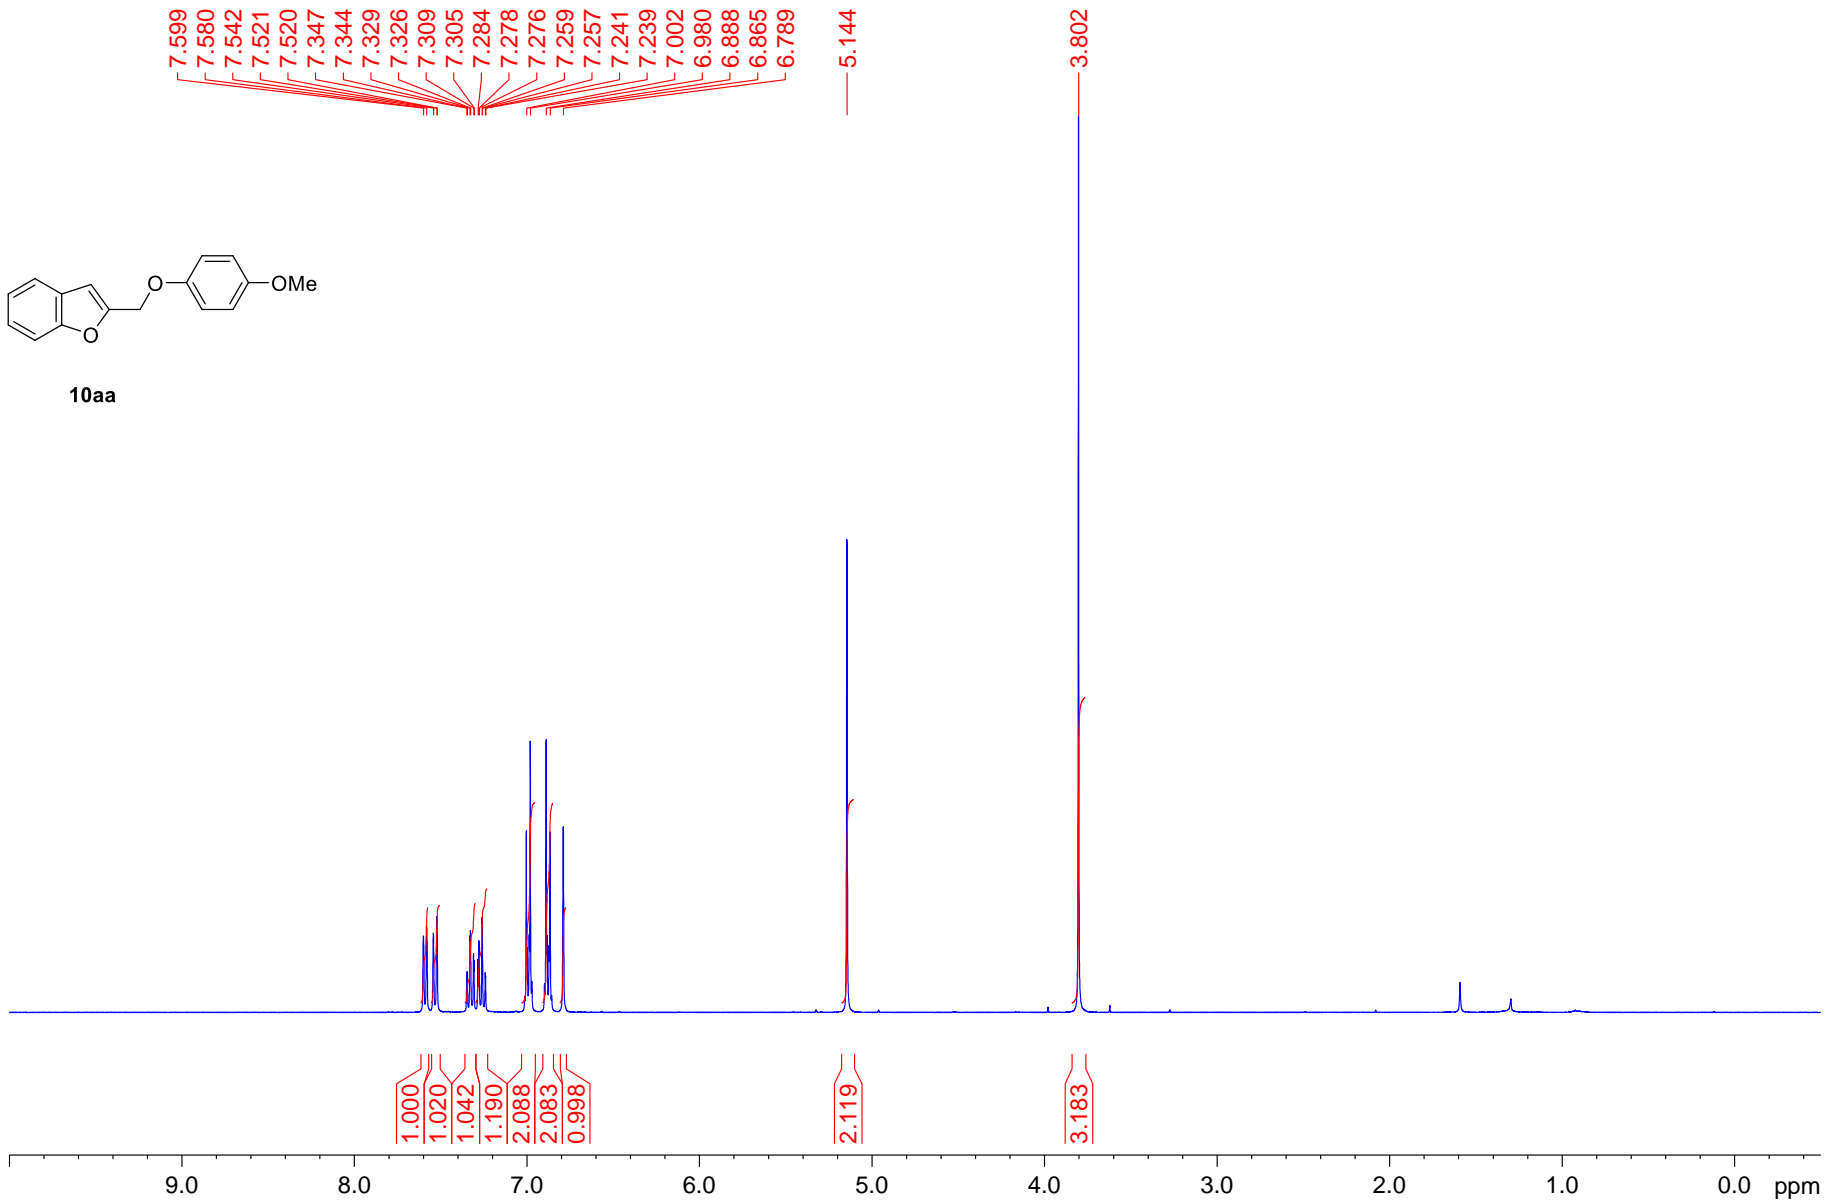





10aa

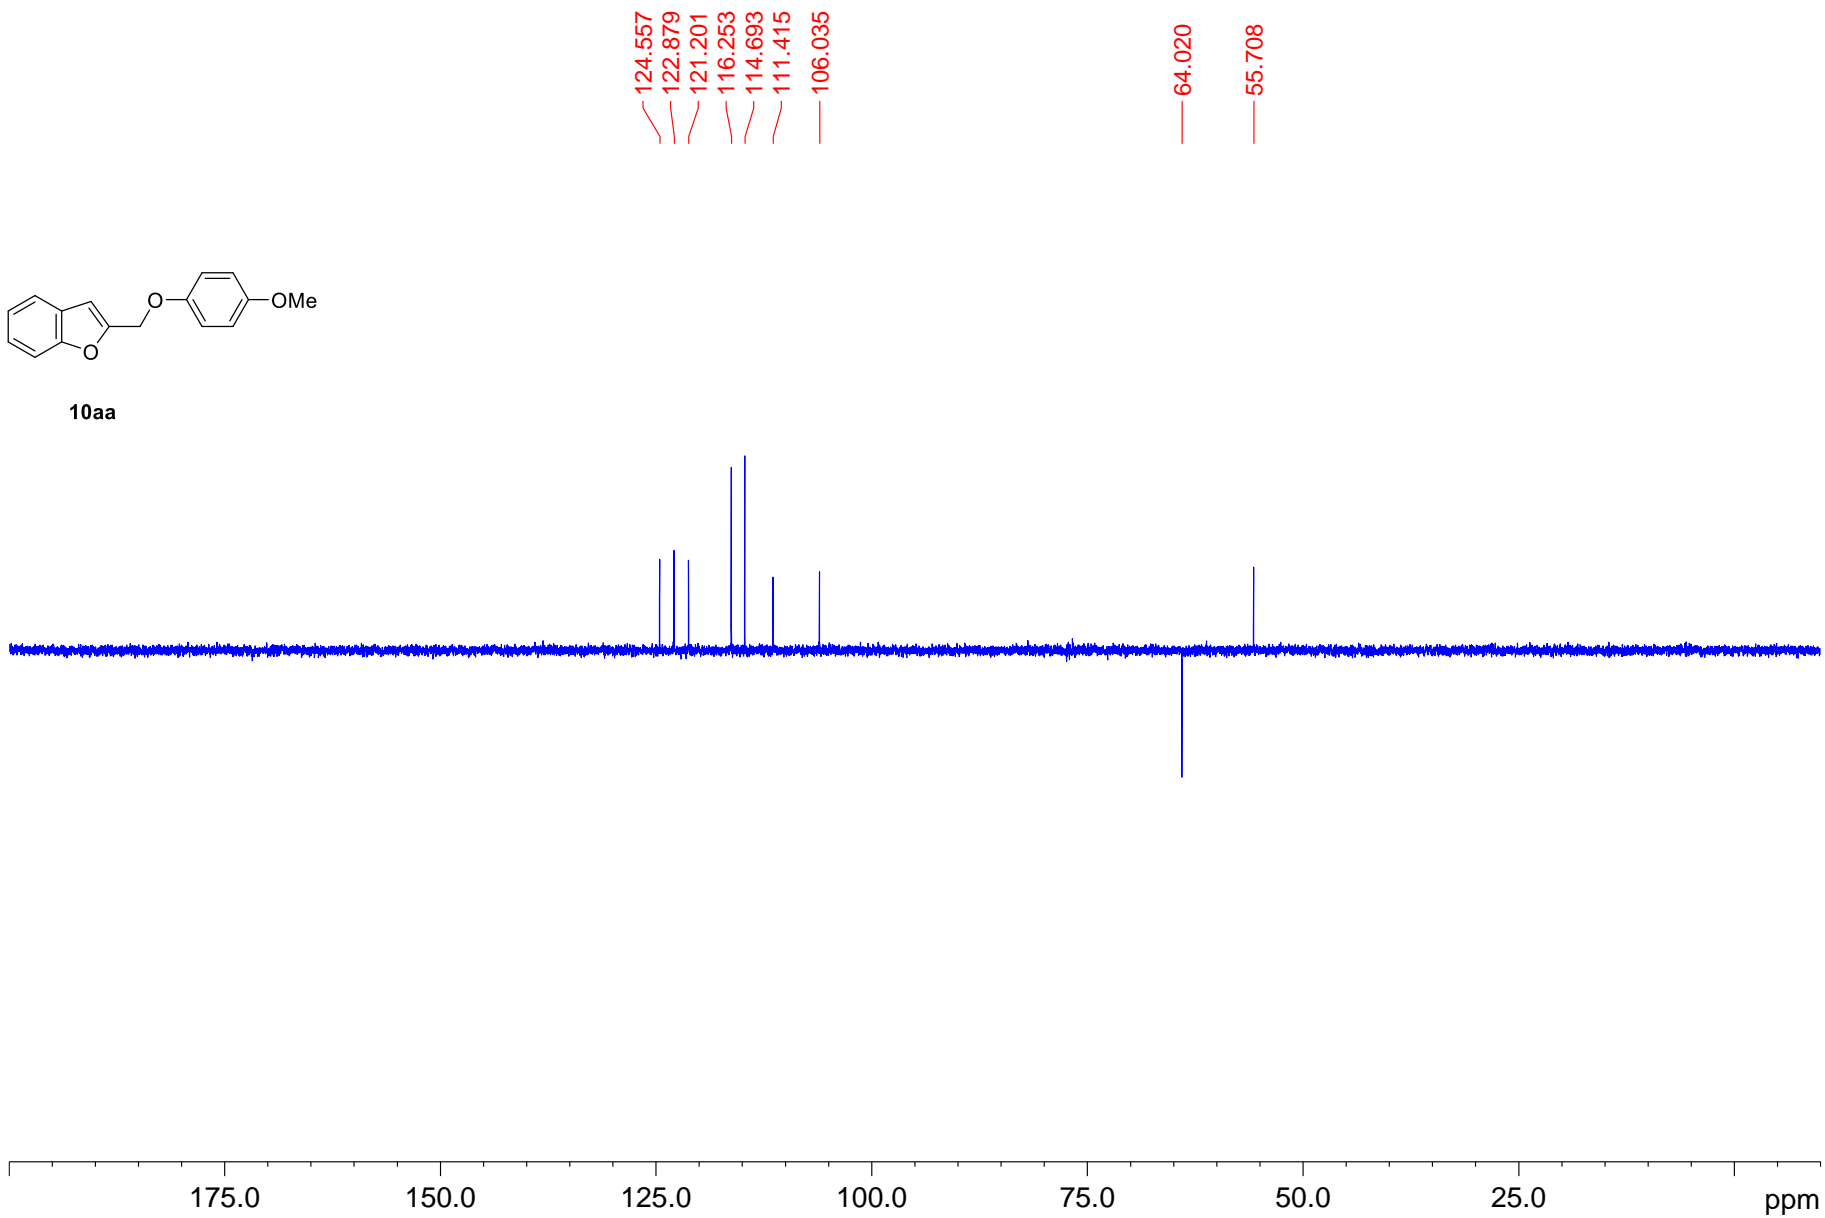

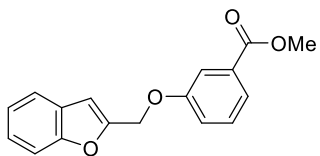

10ab

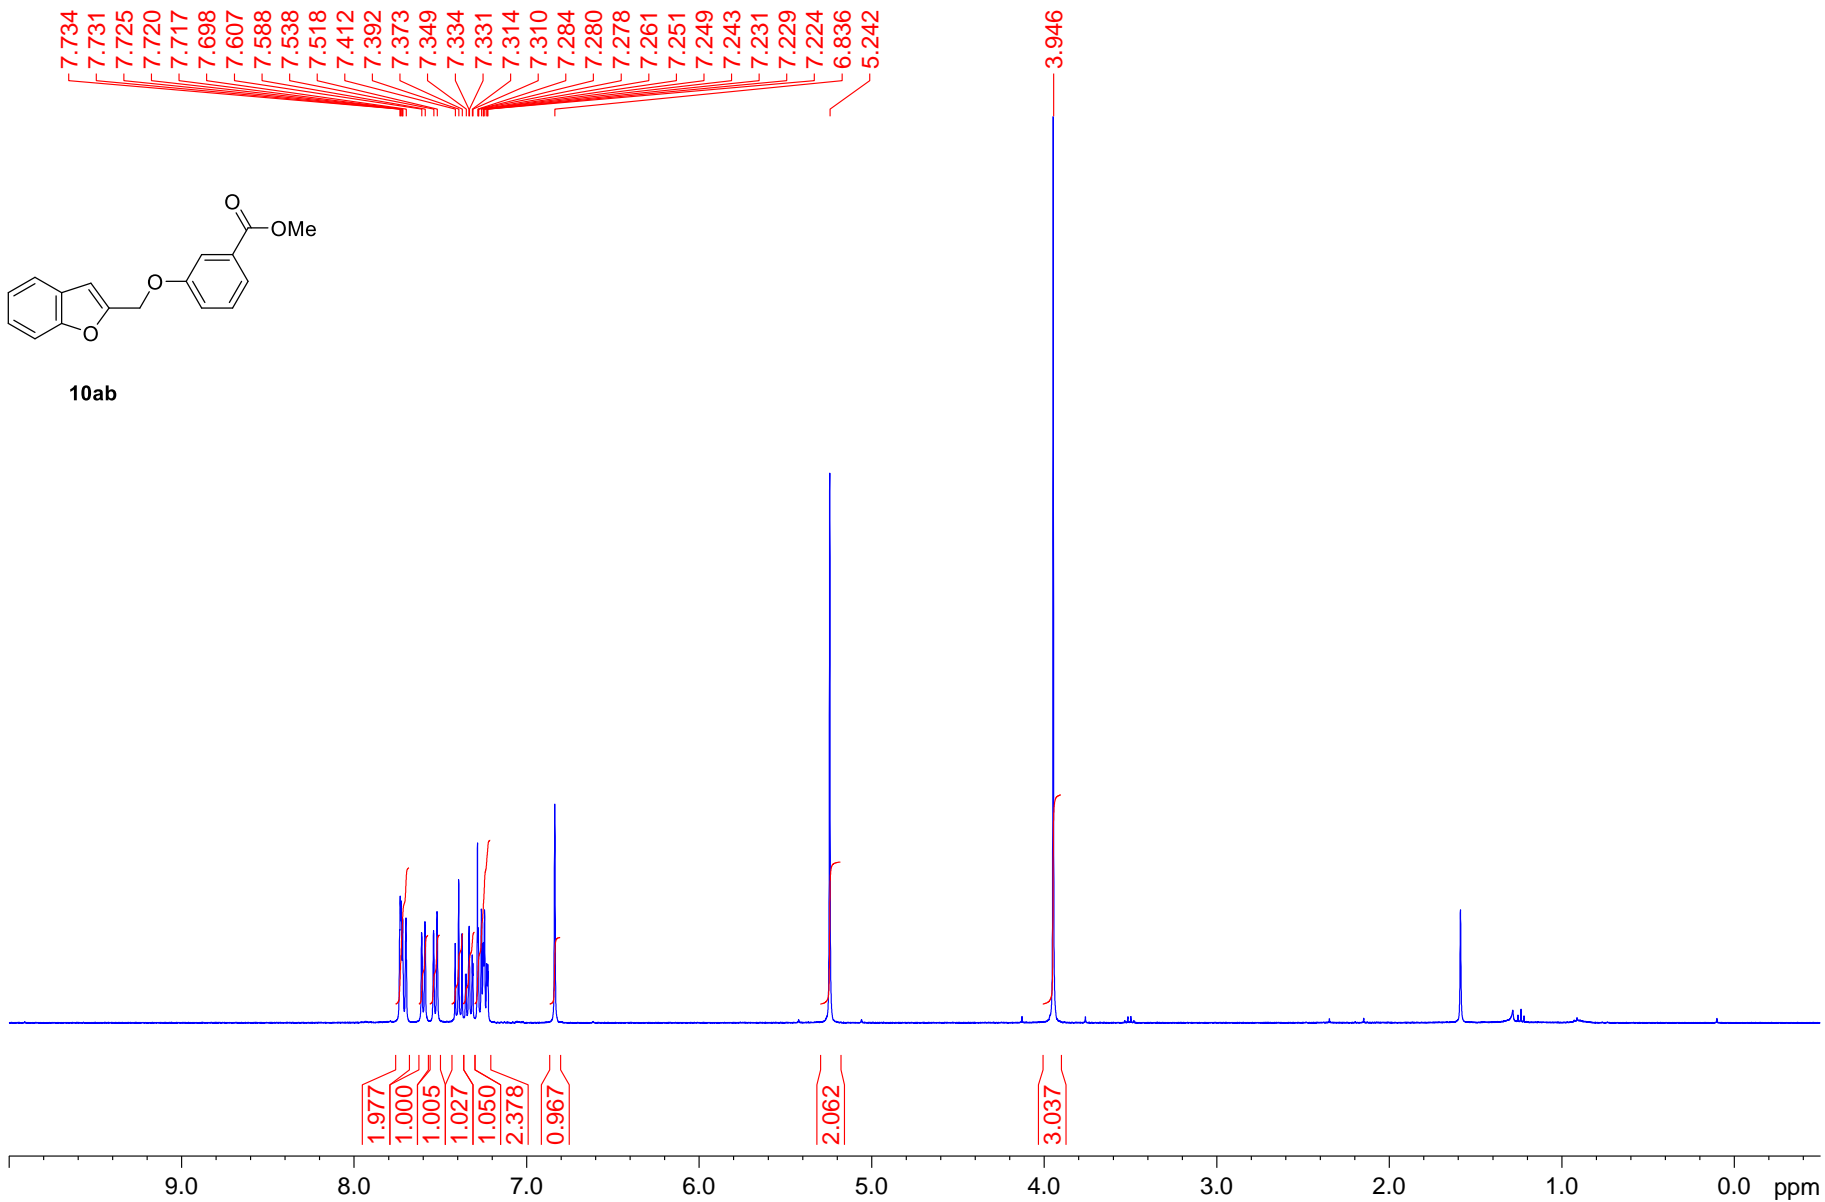

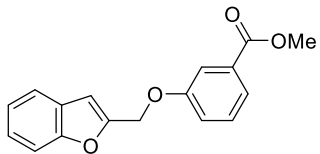

10ab

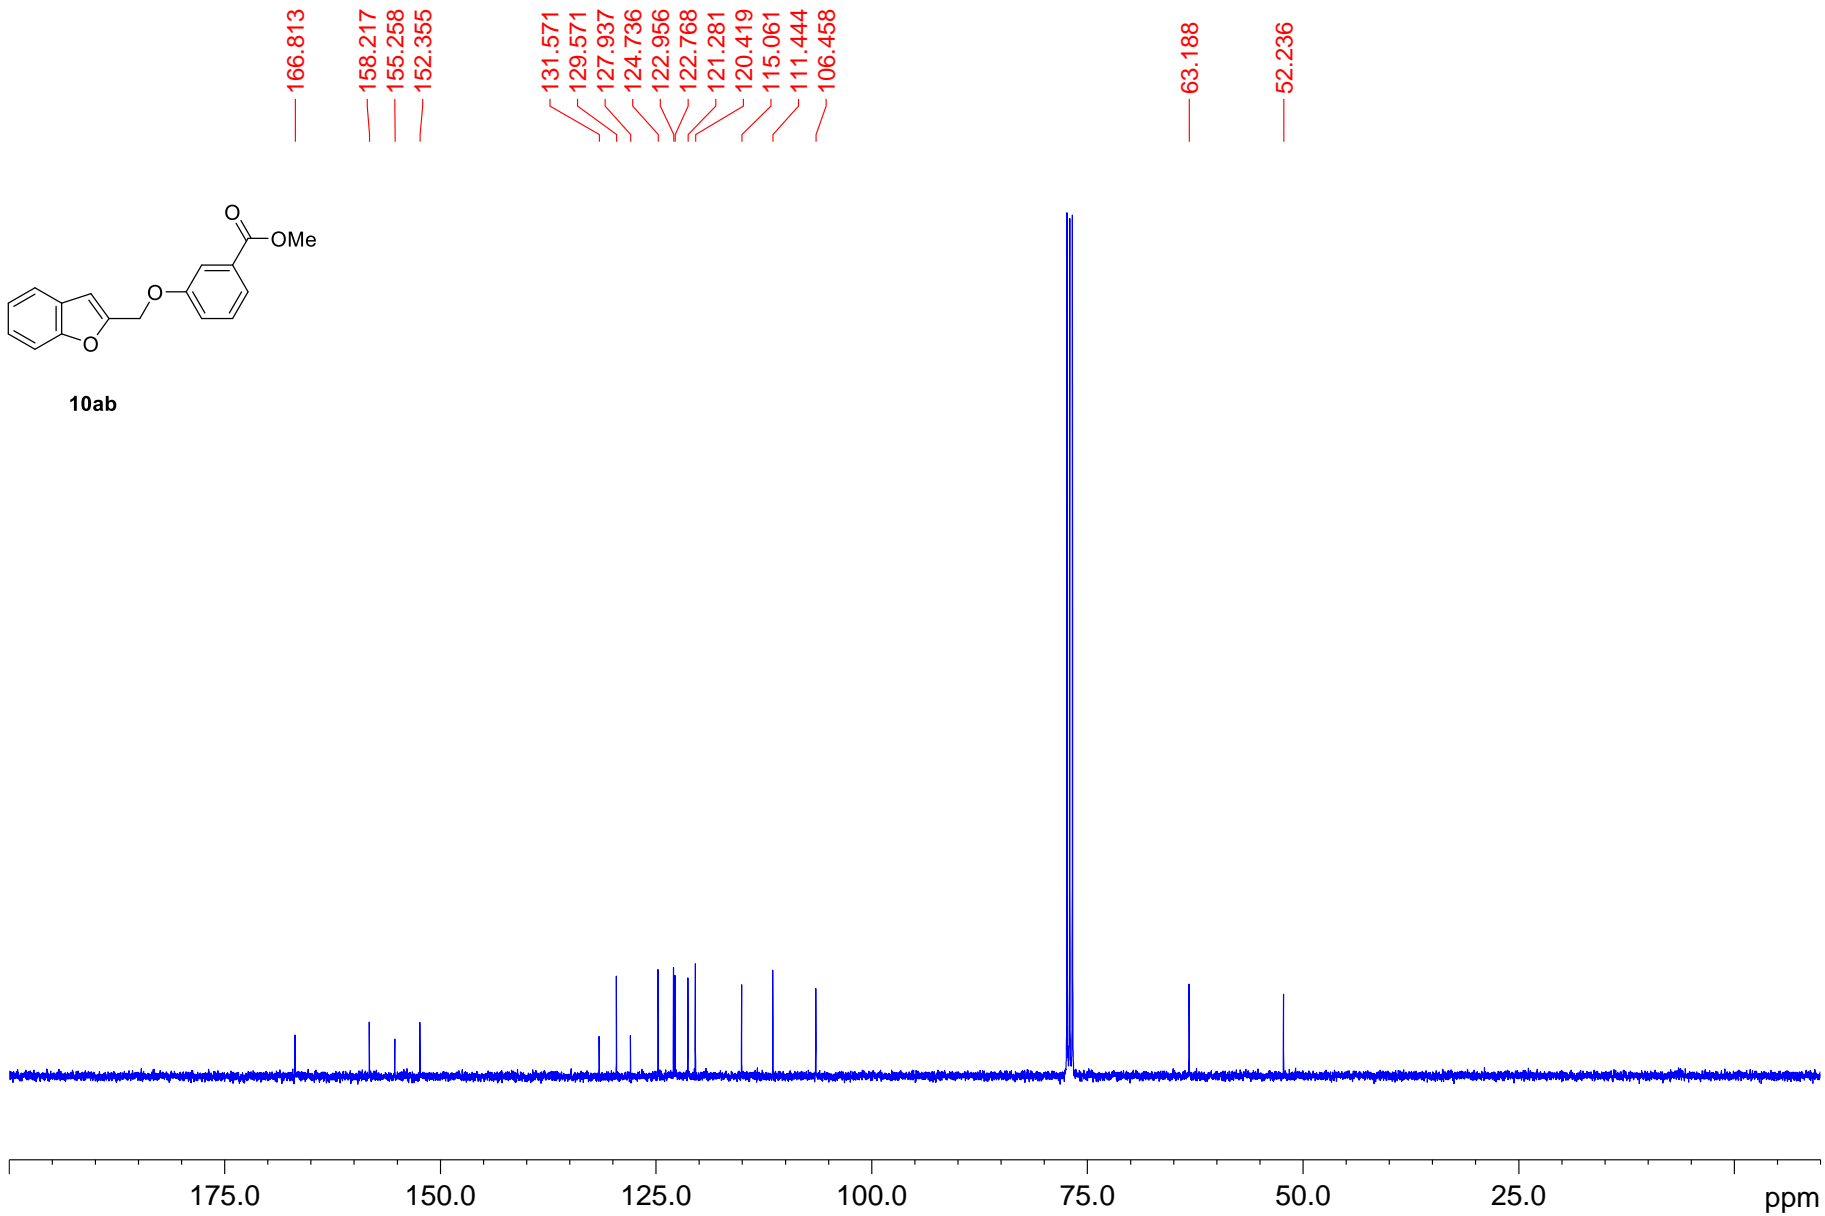

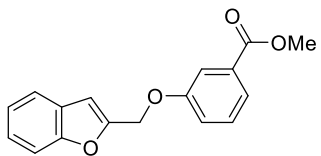

10ab

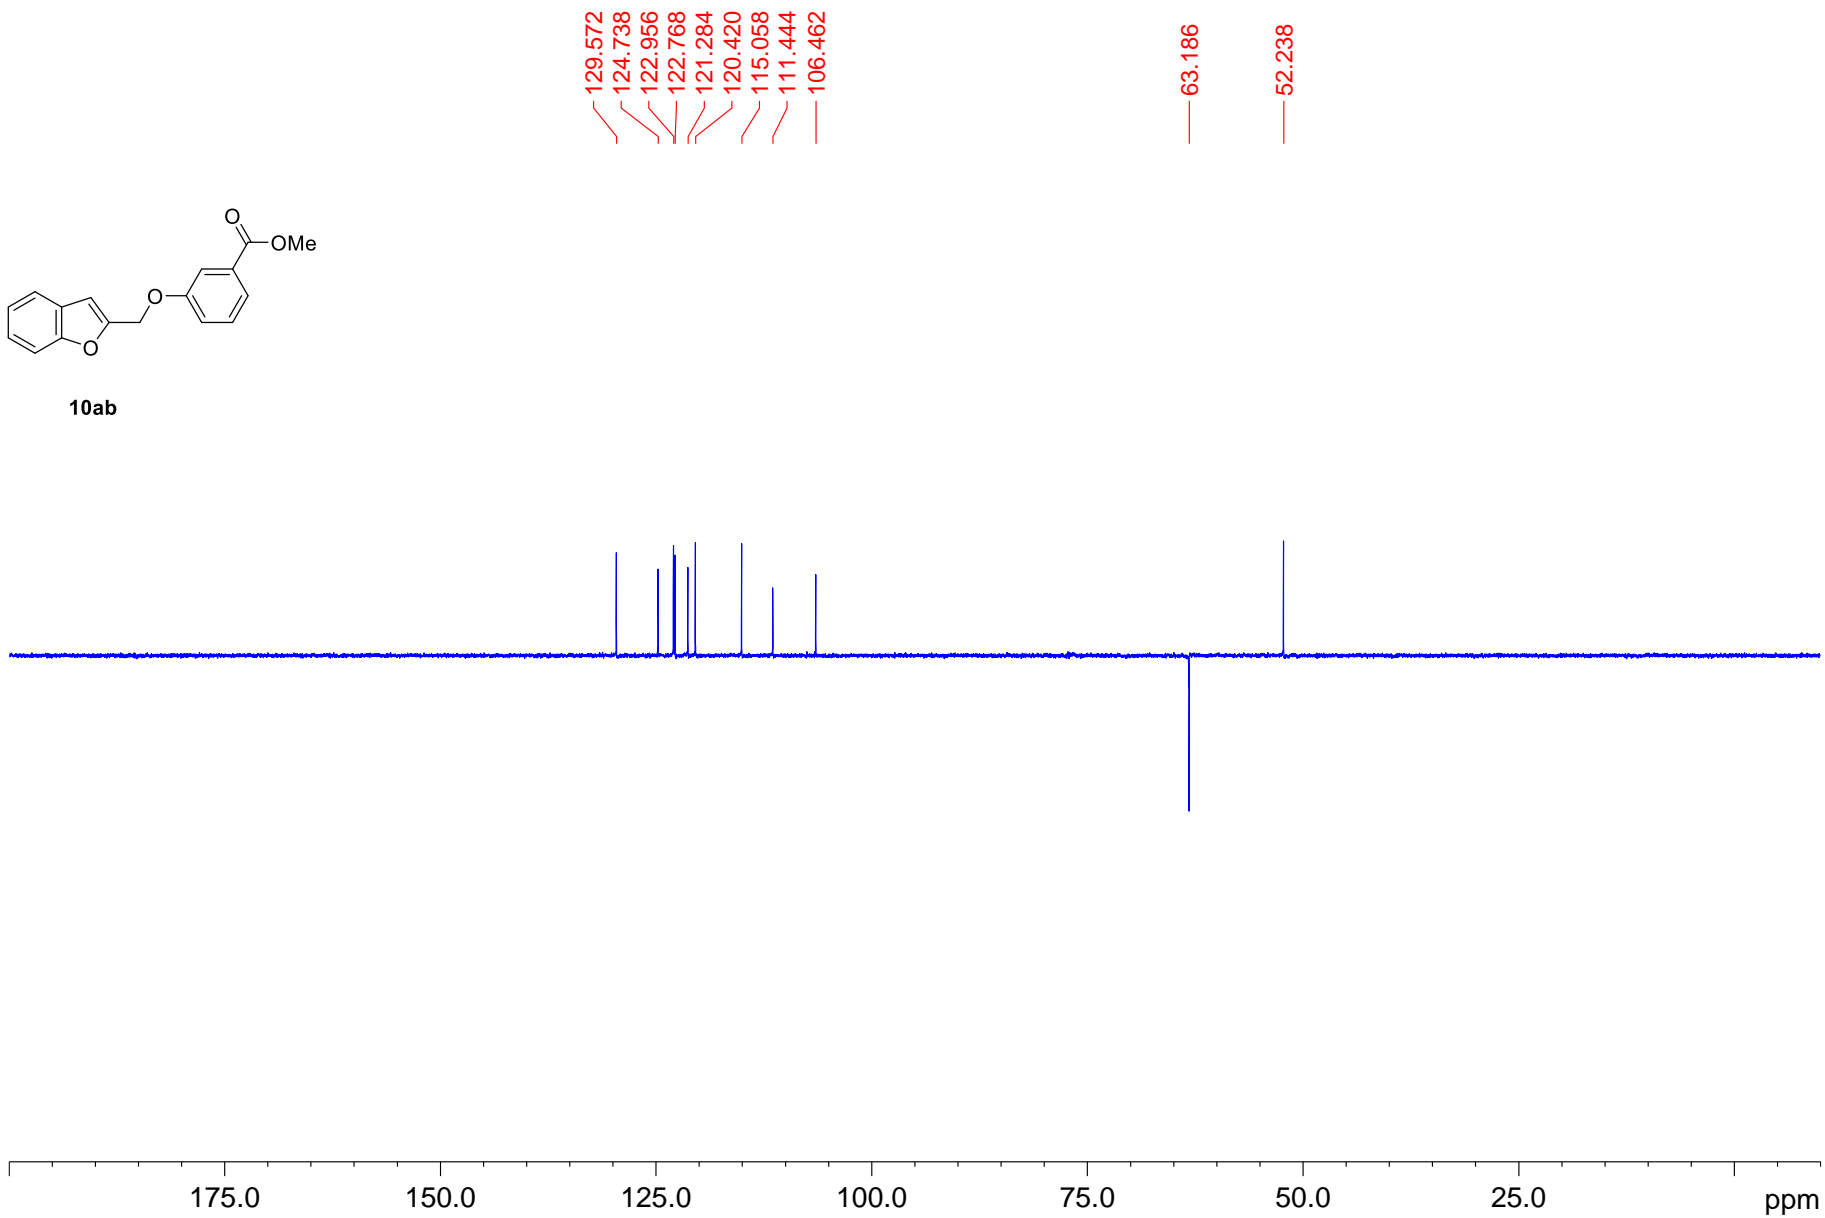

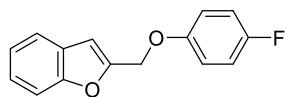

10ac

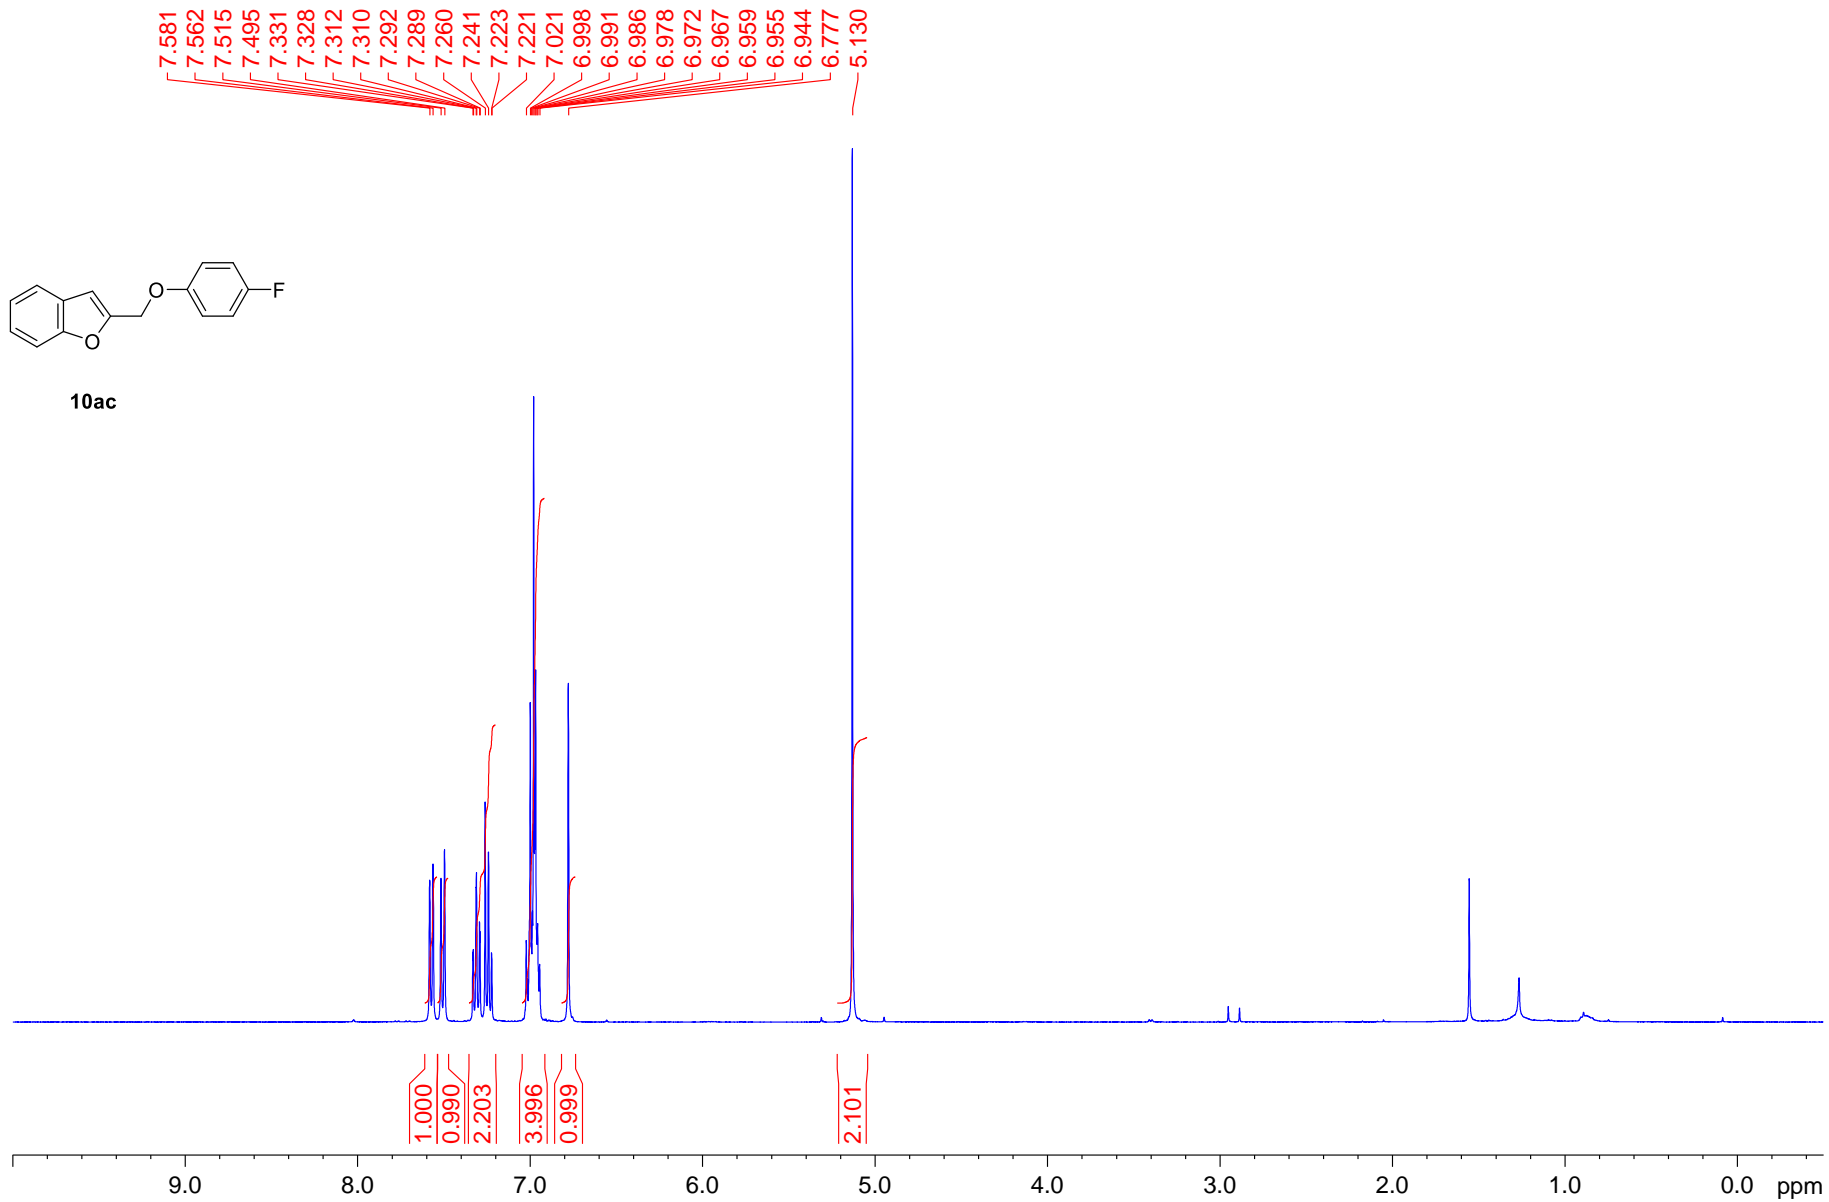

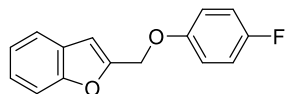

10ac

158.901  
156.523  
155.222  
154.404  
154.383  
152.682

127.955  
124.701  
122.959  
121.253  
116.279  
116.199  
116.060  
115.832  
111.428  
106.261

63.856

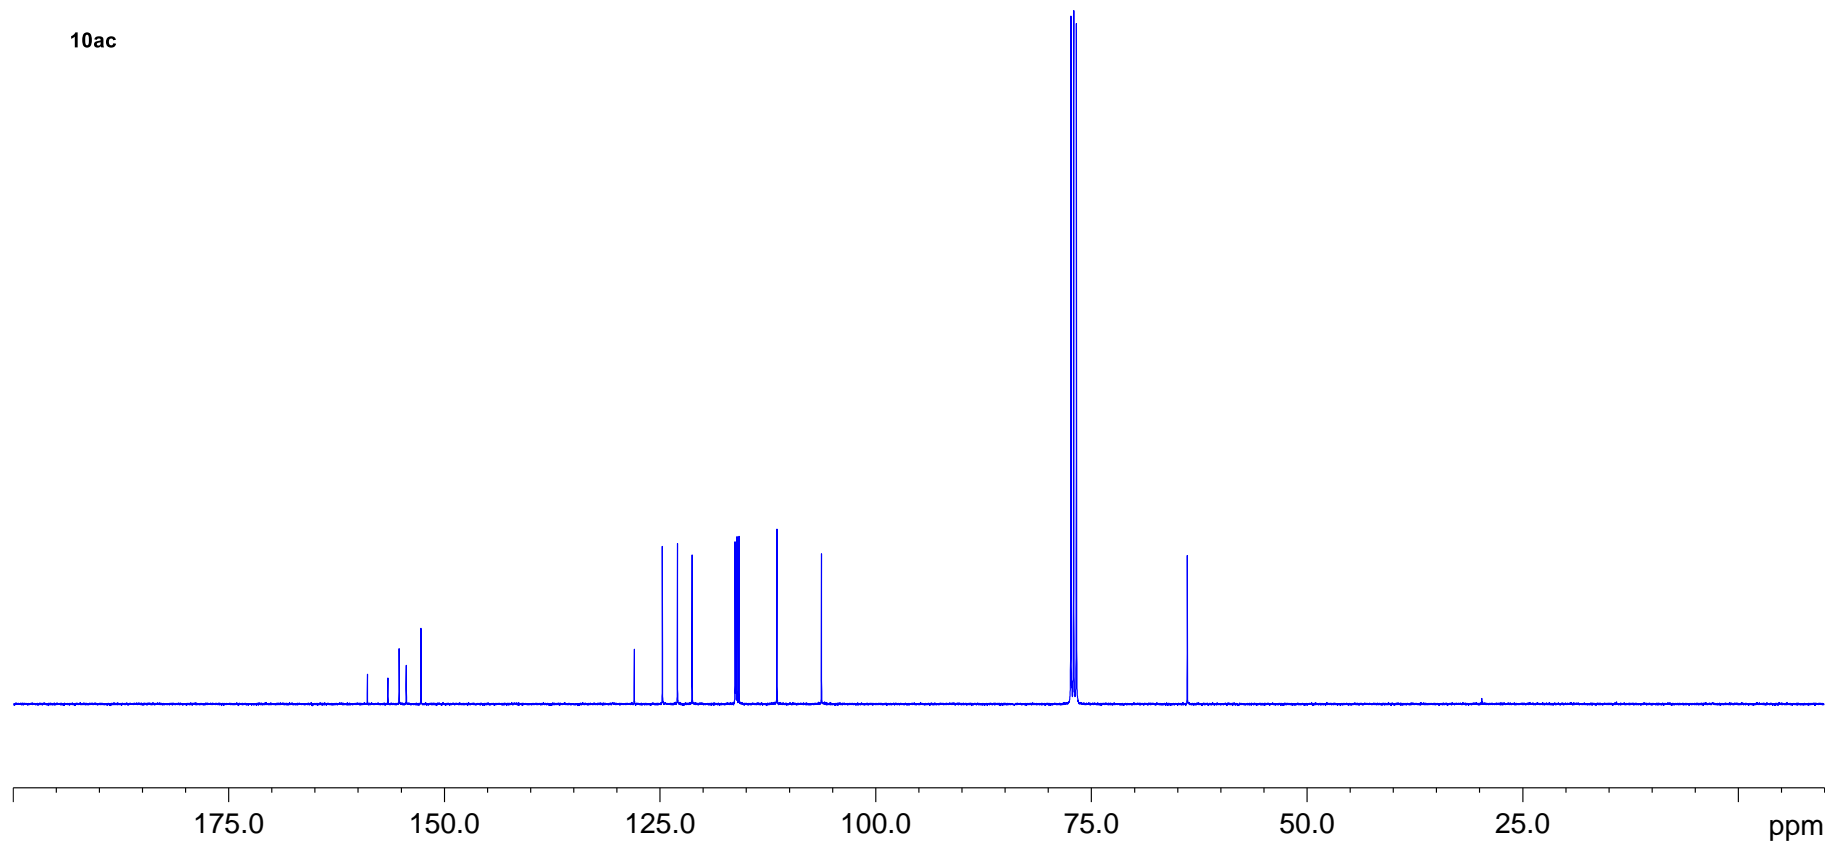

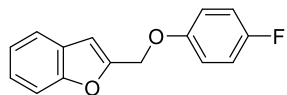

10ac

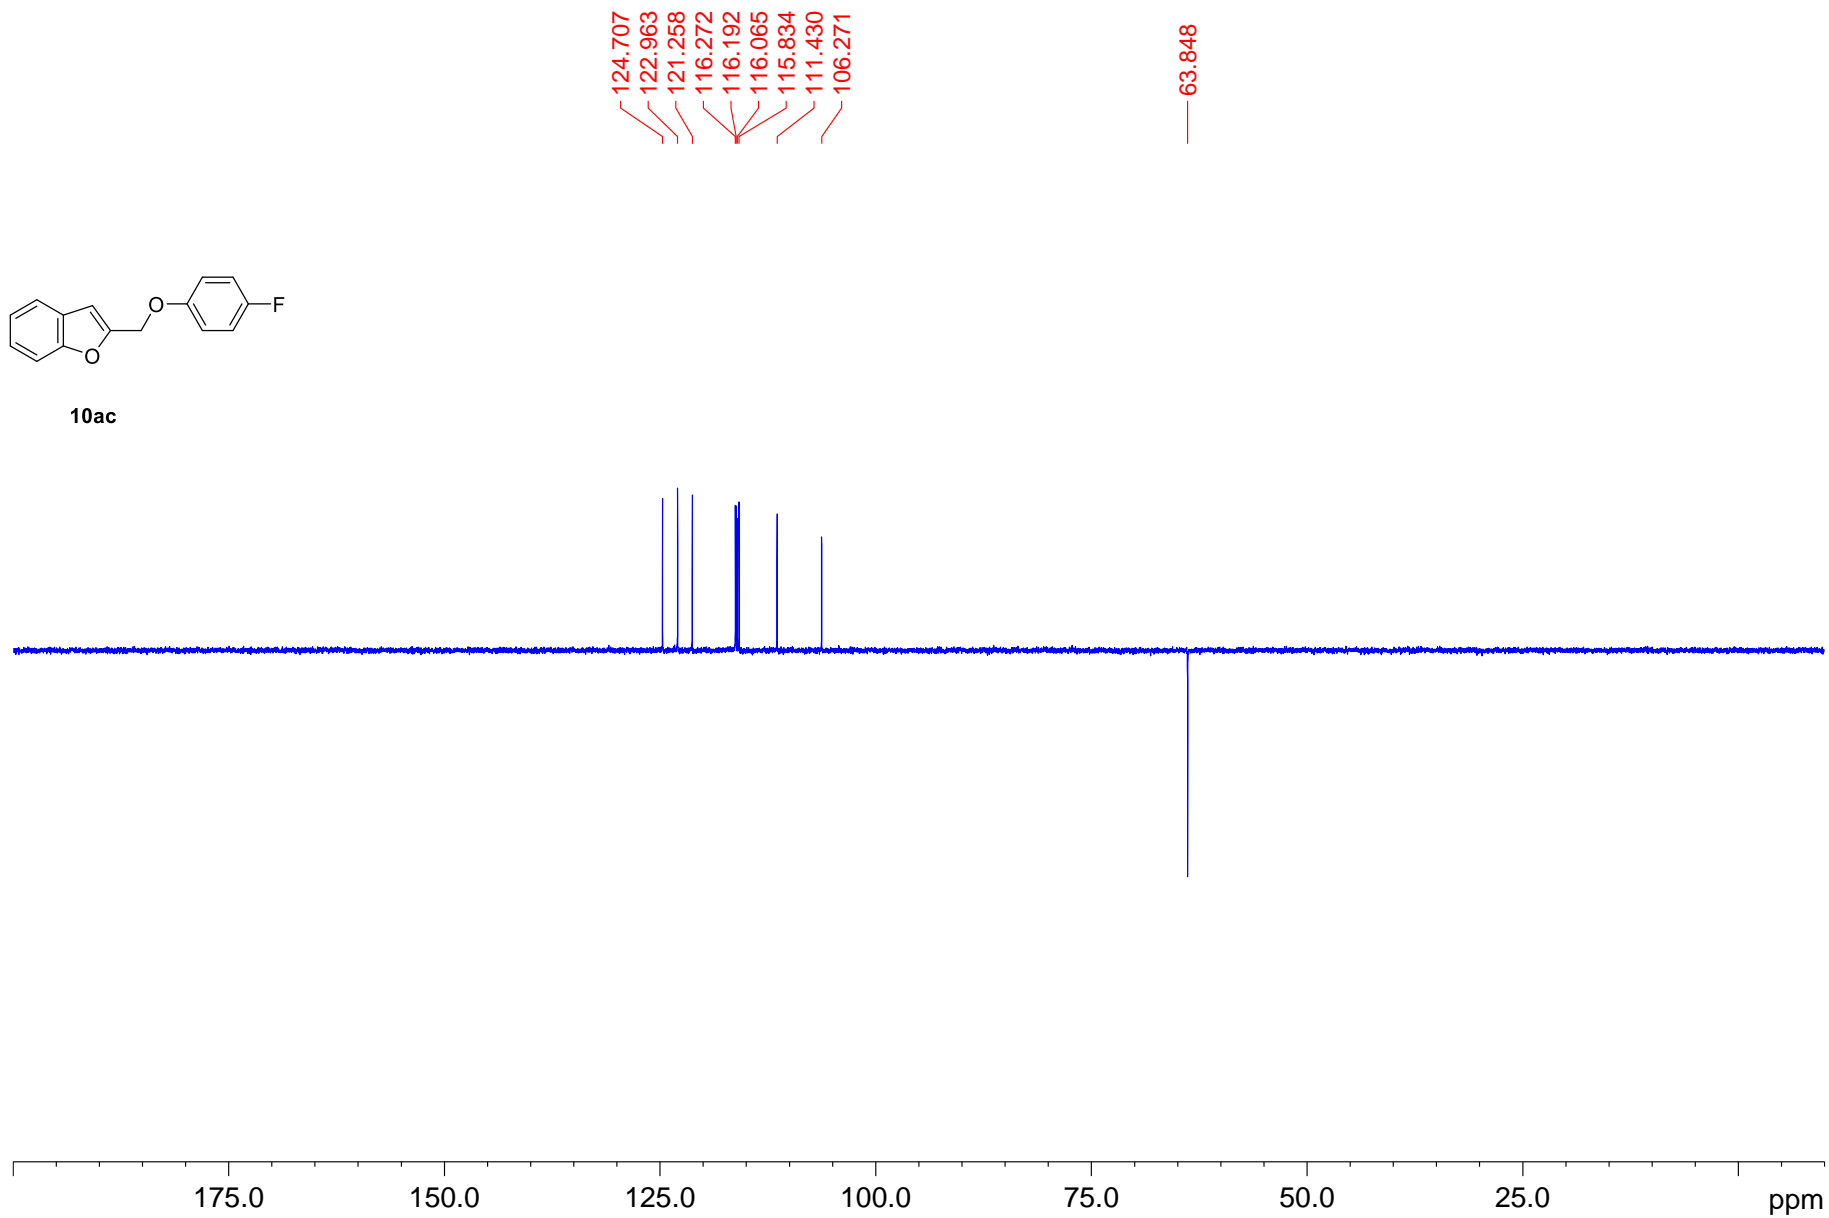

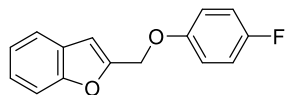

10ac

-122.879  
-122.891  
-122.900  
-122.913  
-122.924  
-122.933  
-122.946

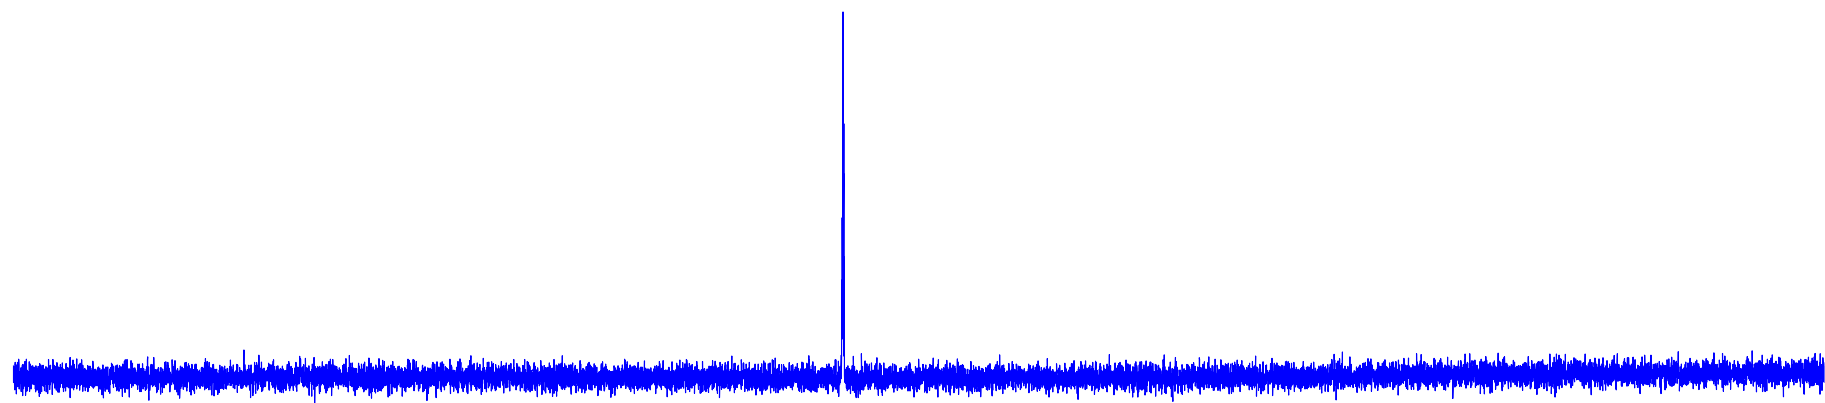

-125.0

ppm



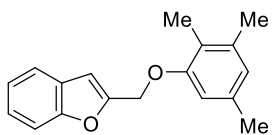

10ad

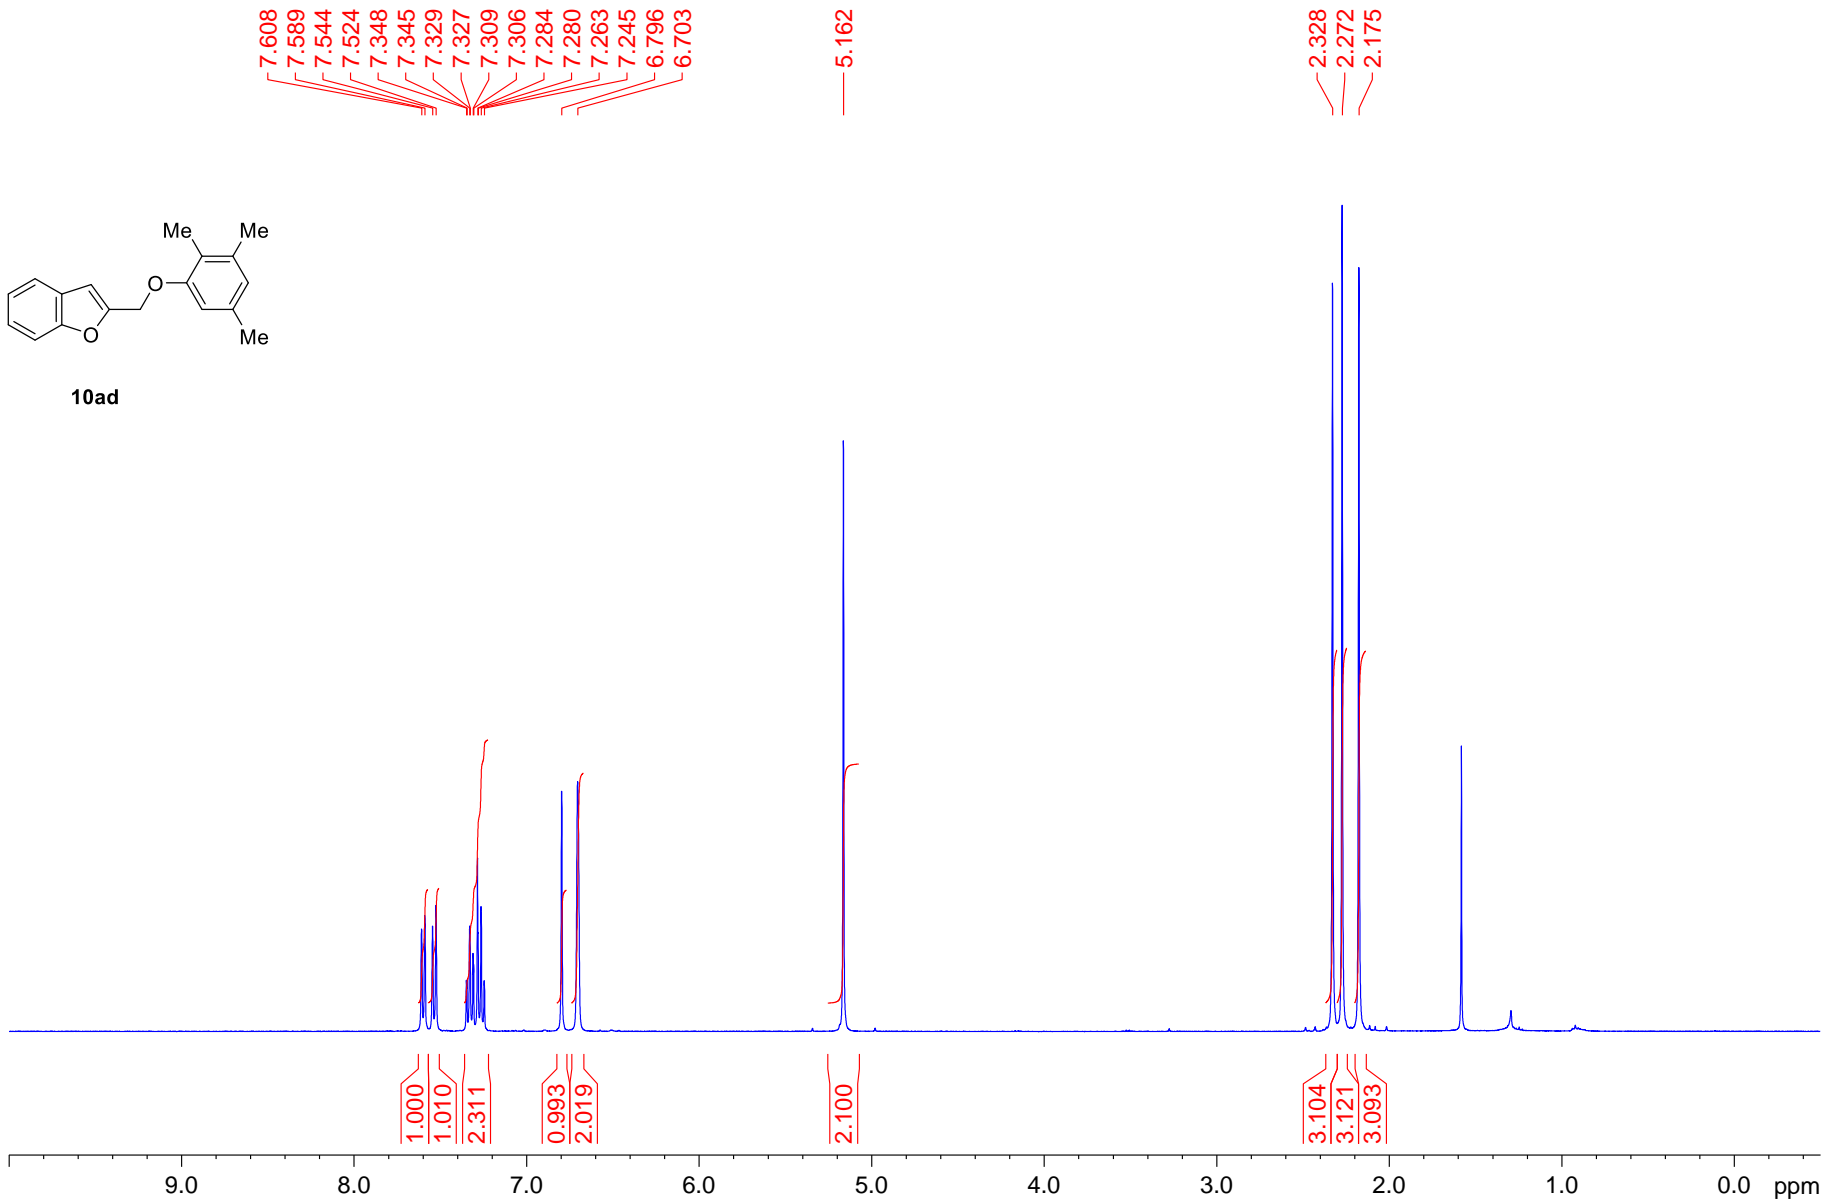

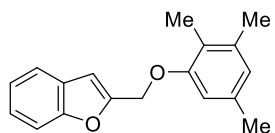

10ad

156.334  
155.155  
153.735

137.904  
135.505  
128.191  
124.378  
123.905  
122.810  
122.743  
121.133  
111.356  
110.887  
105.458

63.849

21.317  
20.026

11.451

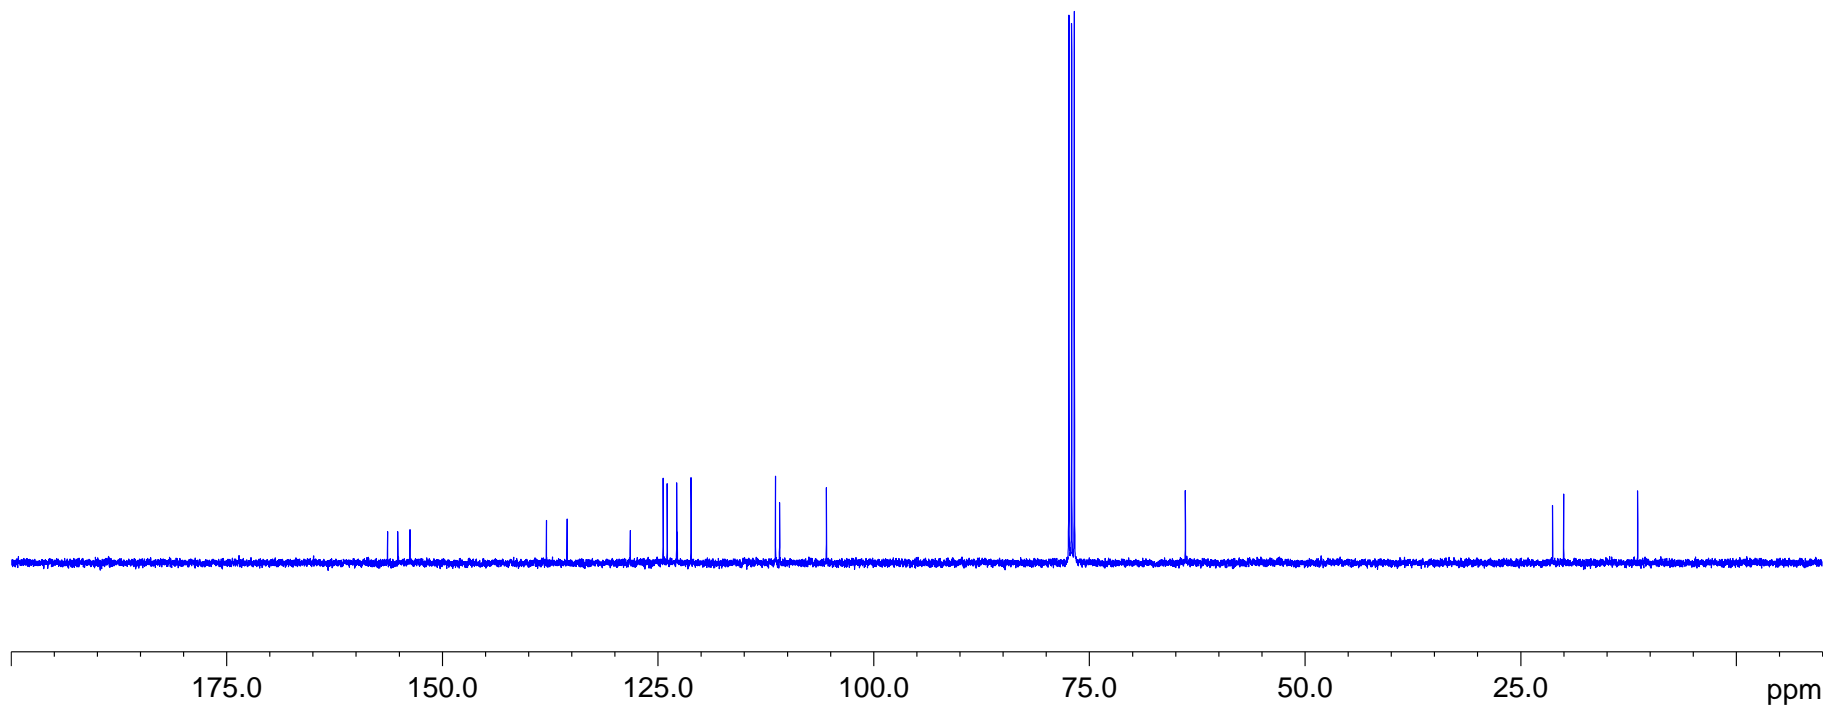

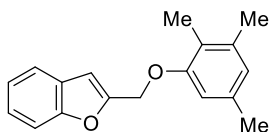

10ad

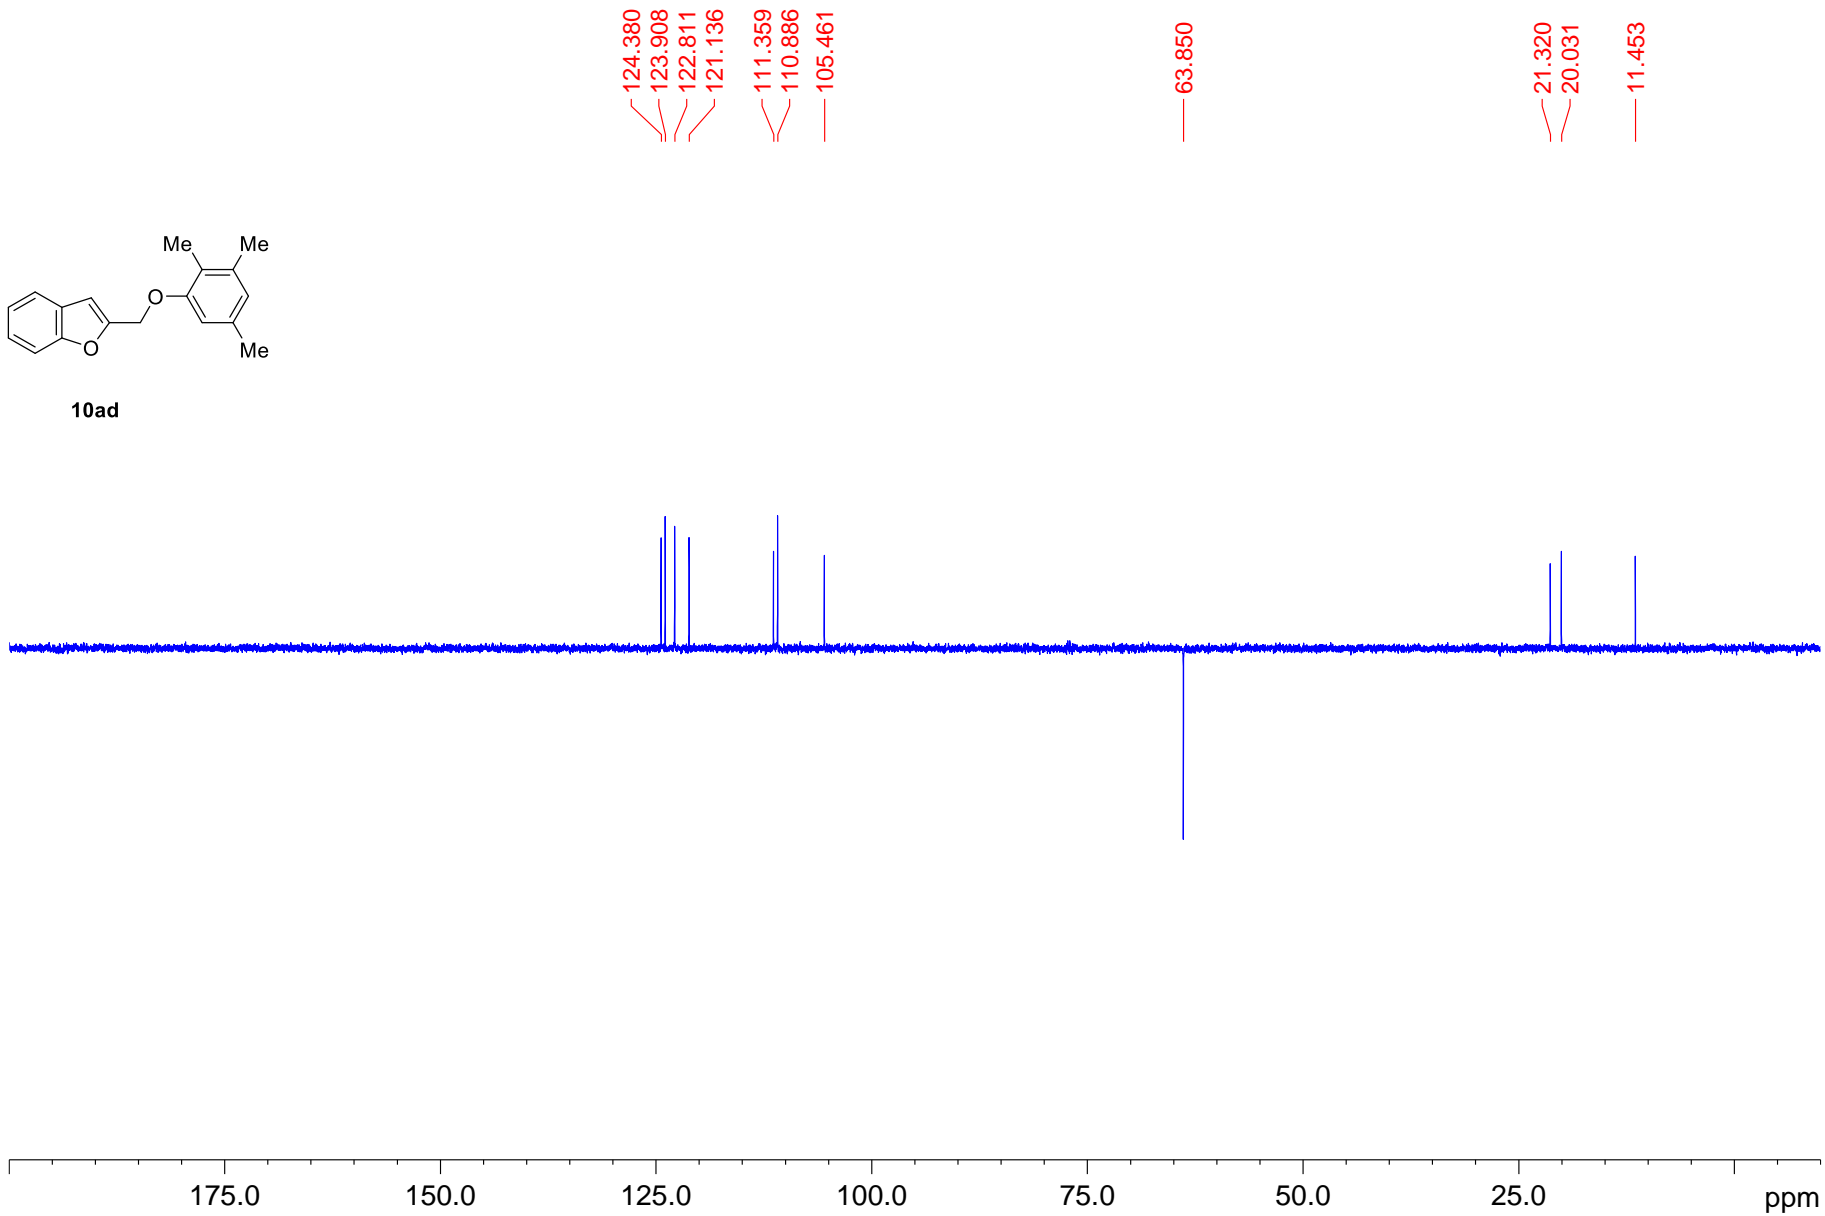

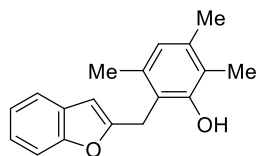

11a

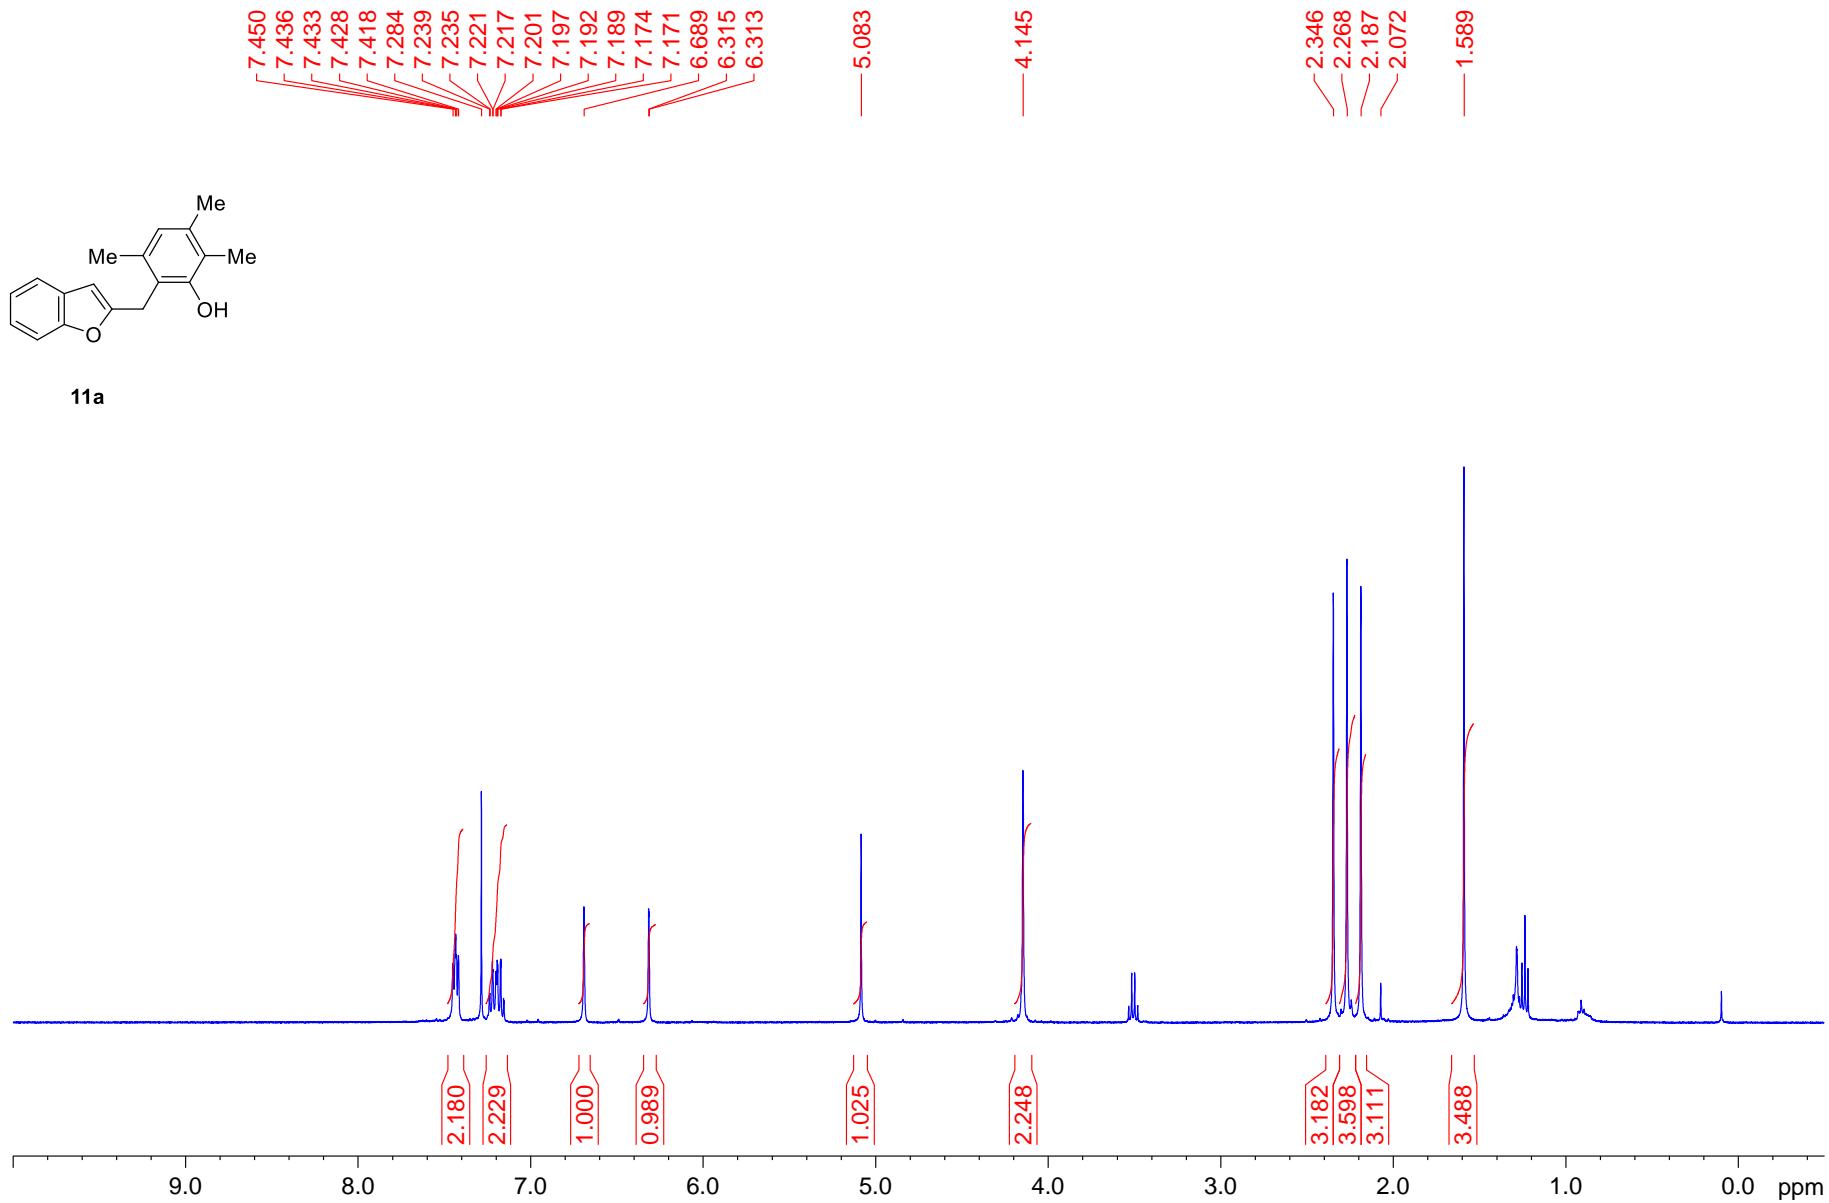

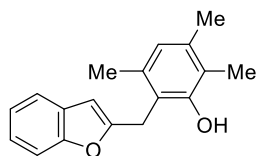

11a

157.148  
154.803  
152.157

136.082  
134.611  
128.762  
124.334  
123.364  
122.565  
120.325  
120.260  
119.478  
110.888

102.541

26.075  
19.997  
19.415  
11.750

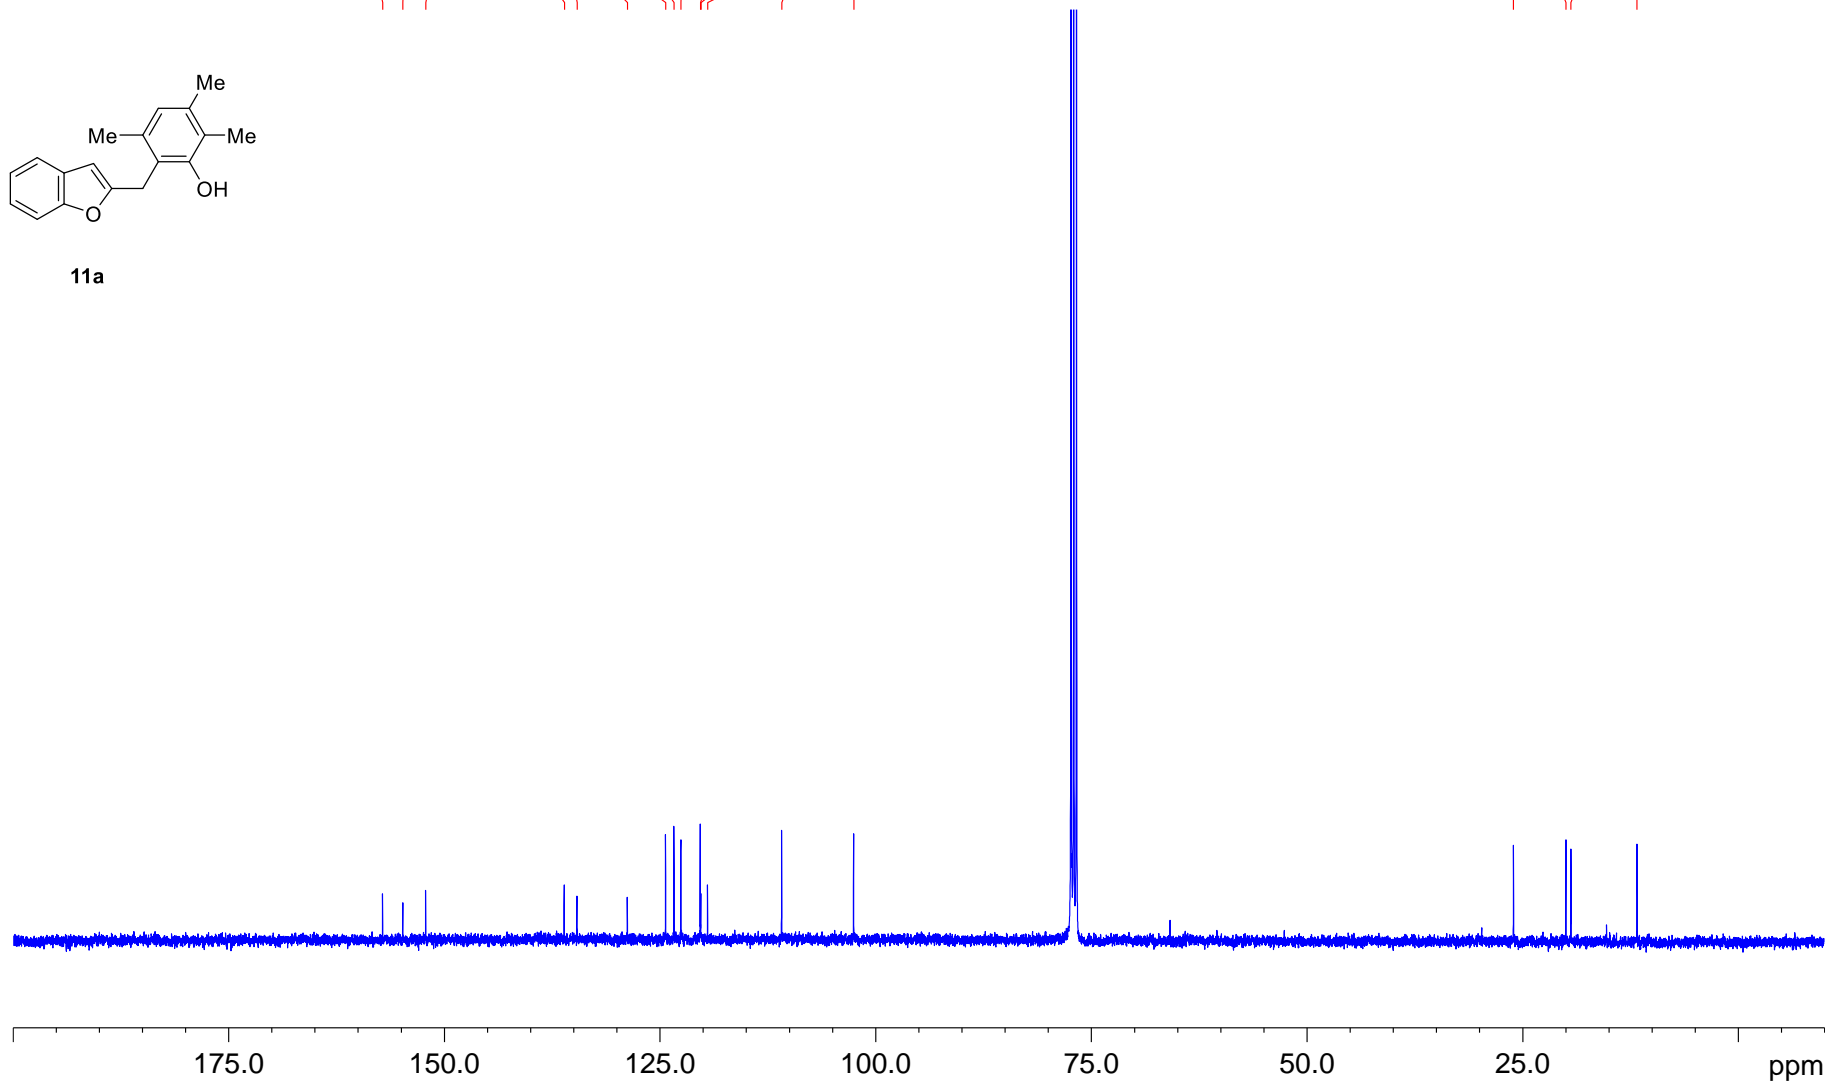

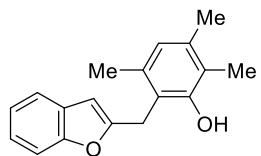

11a

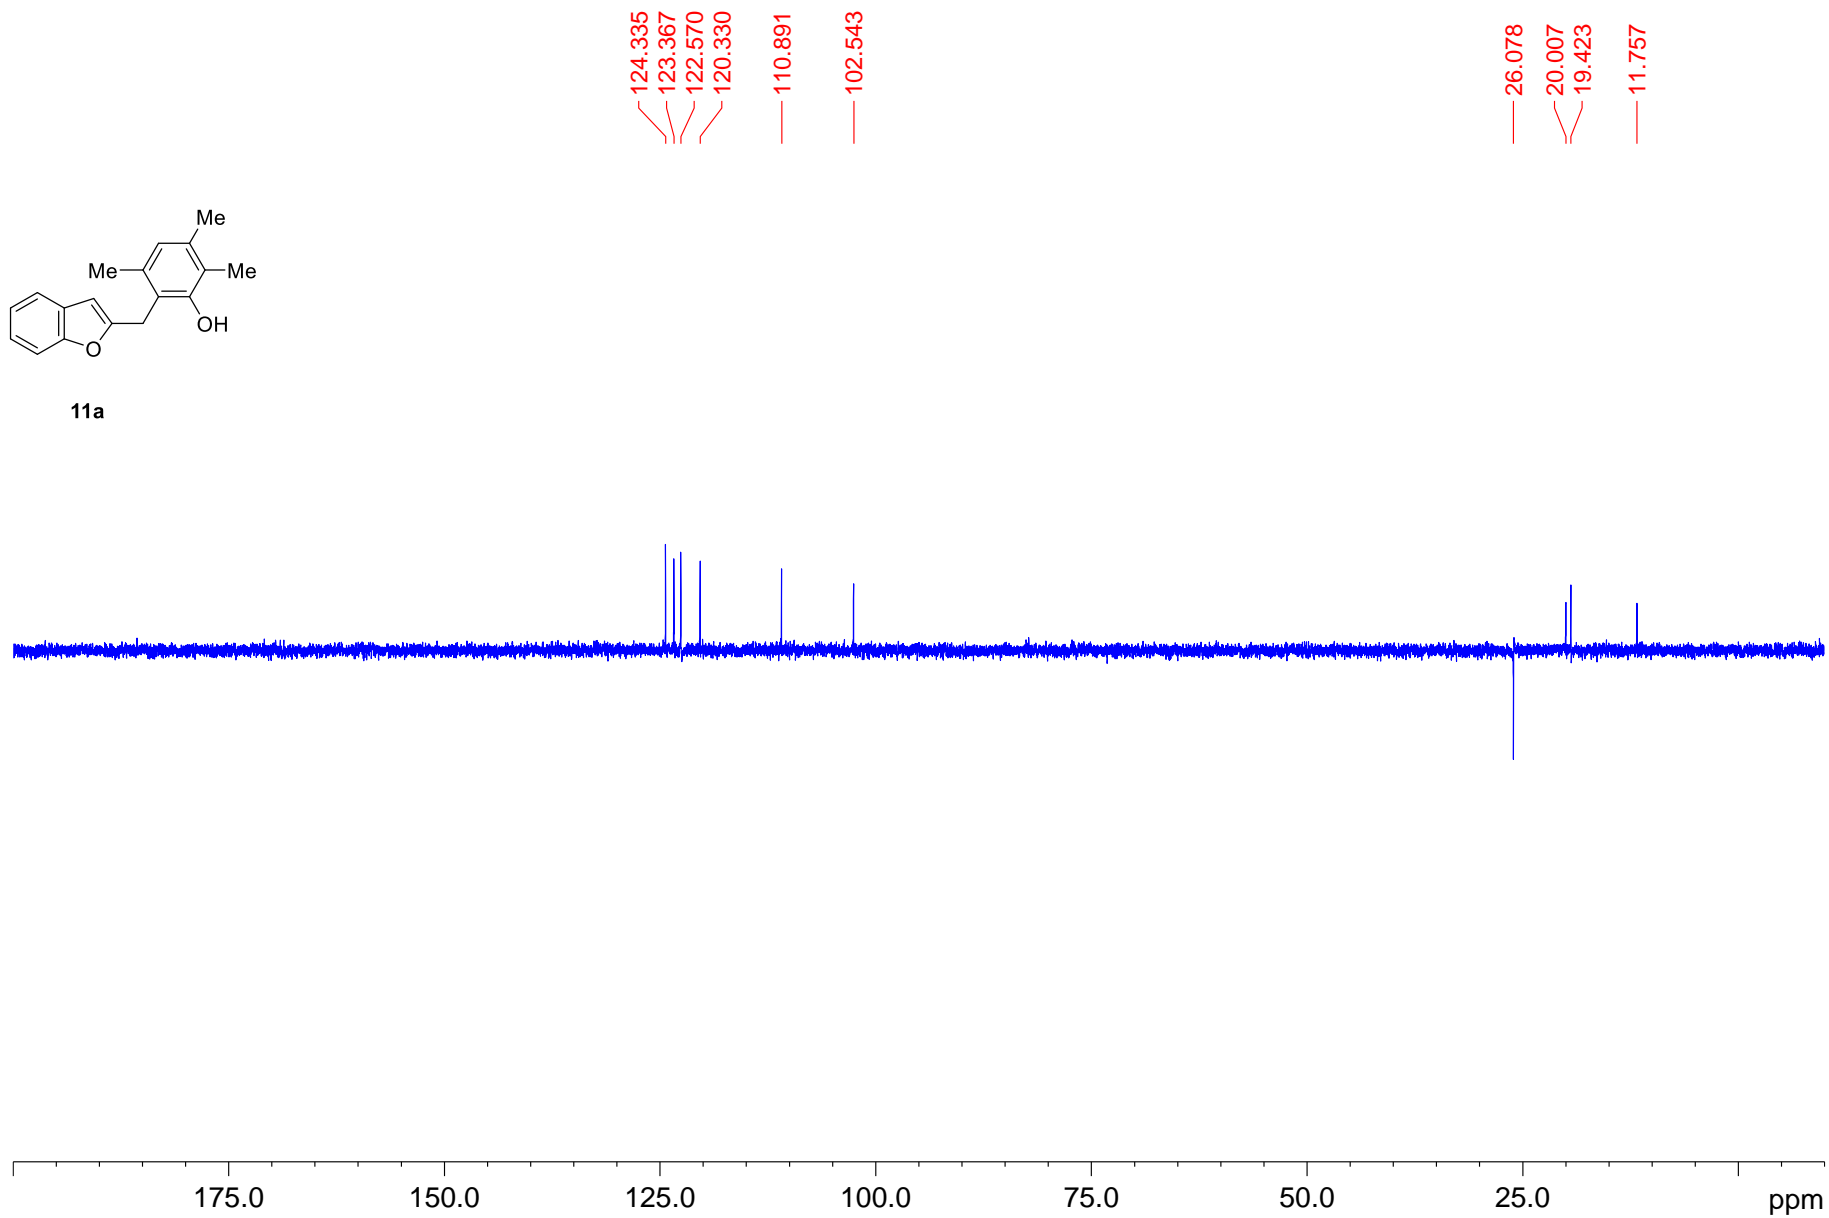

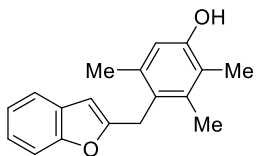

11b

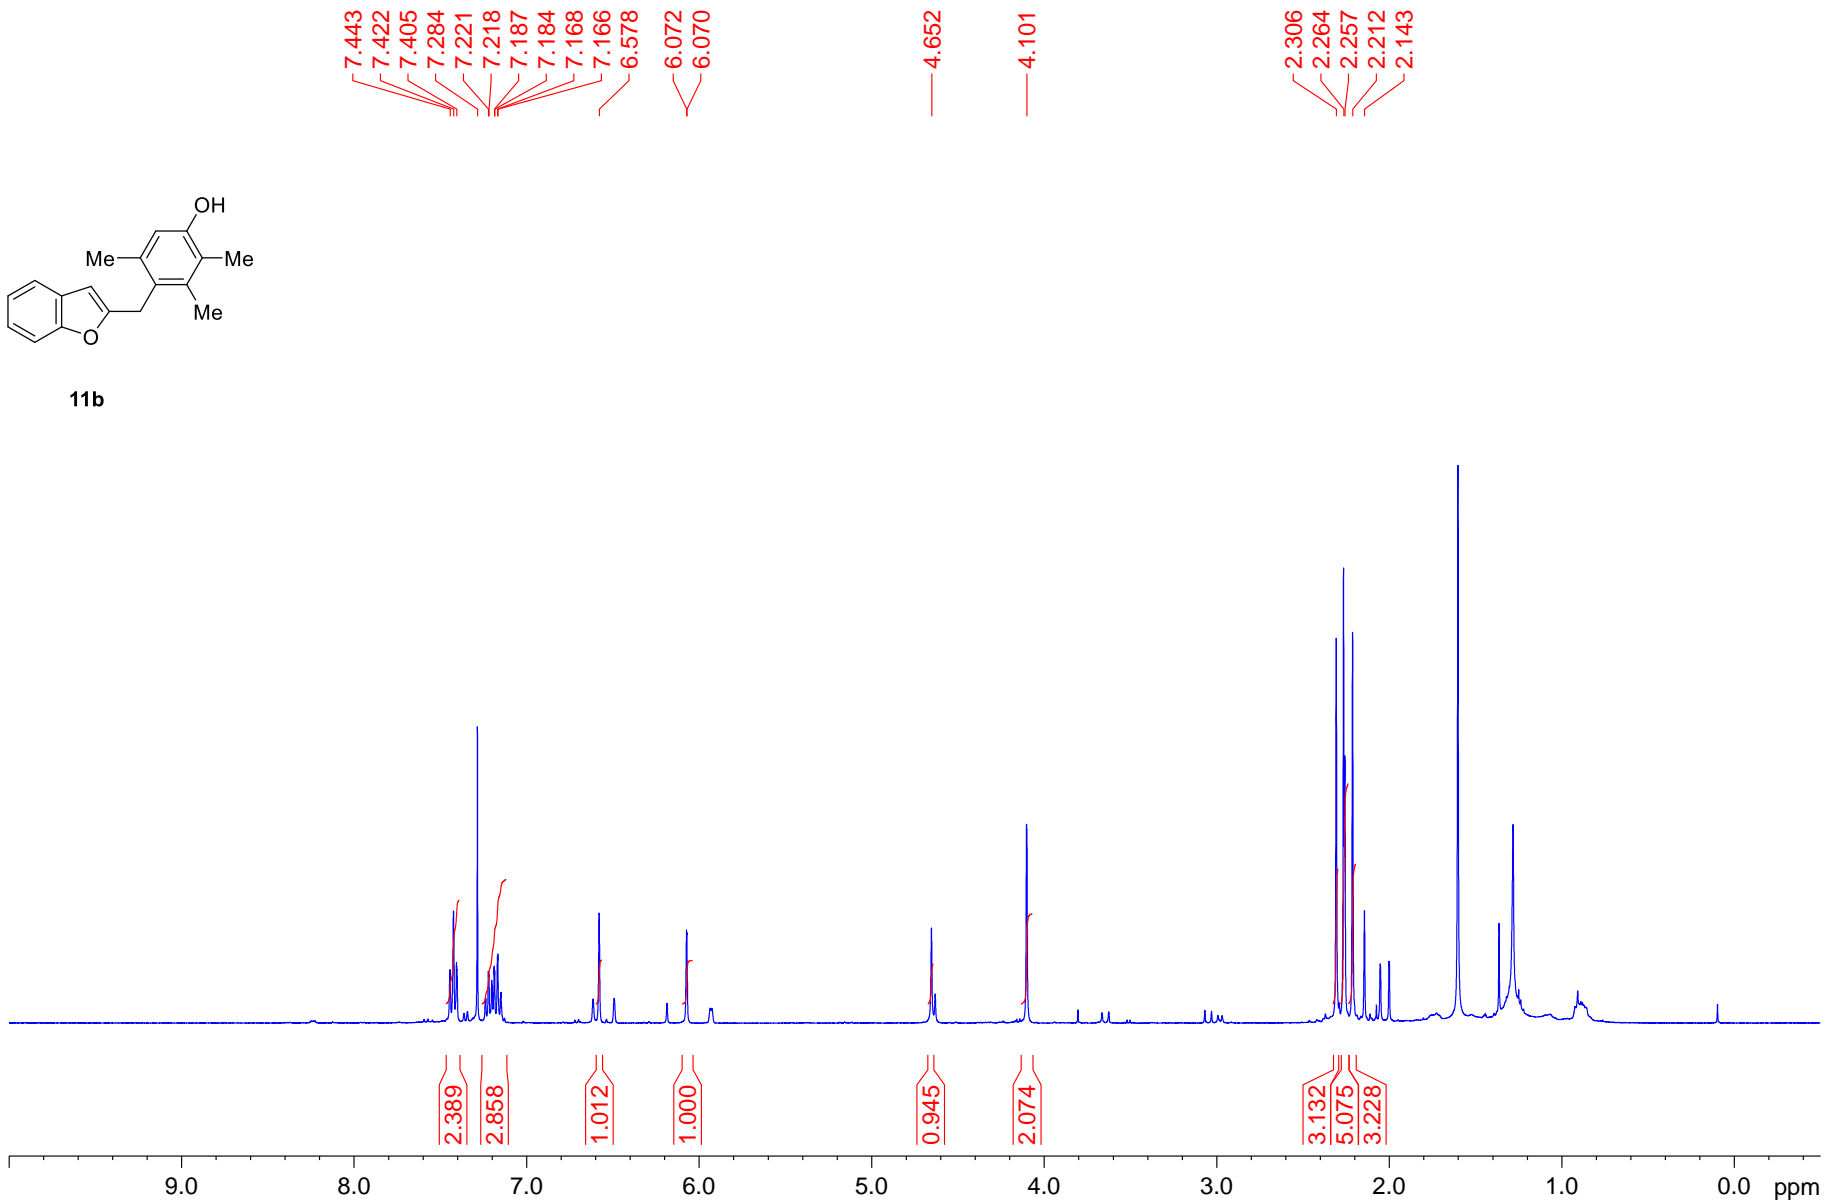

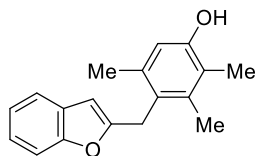

11b

158.012  
154.871  
152.107  
137.355  
135.207  
128.909  
126.055  
123.628  
123.236  
123.139  
122.392  
122.336  
121.360  
120.348  
120.185  
114.589  
113.331  
110.794  
102.542

29.045  
20.076  
16.132  
12.033

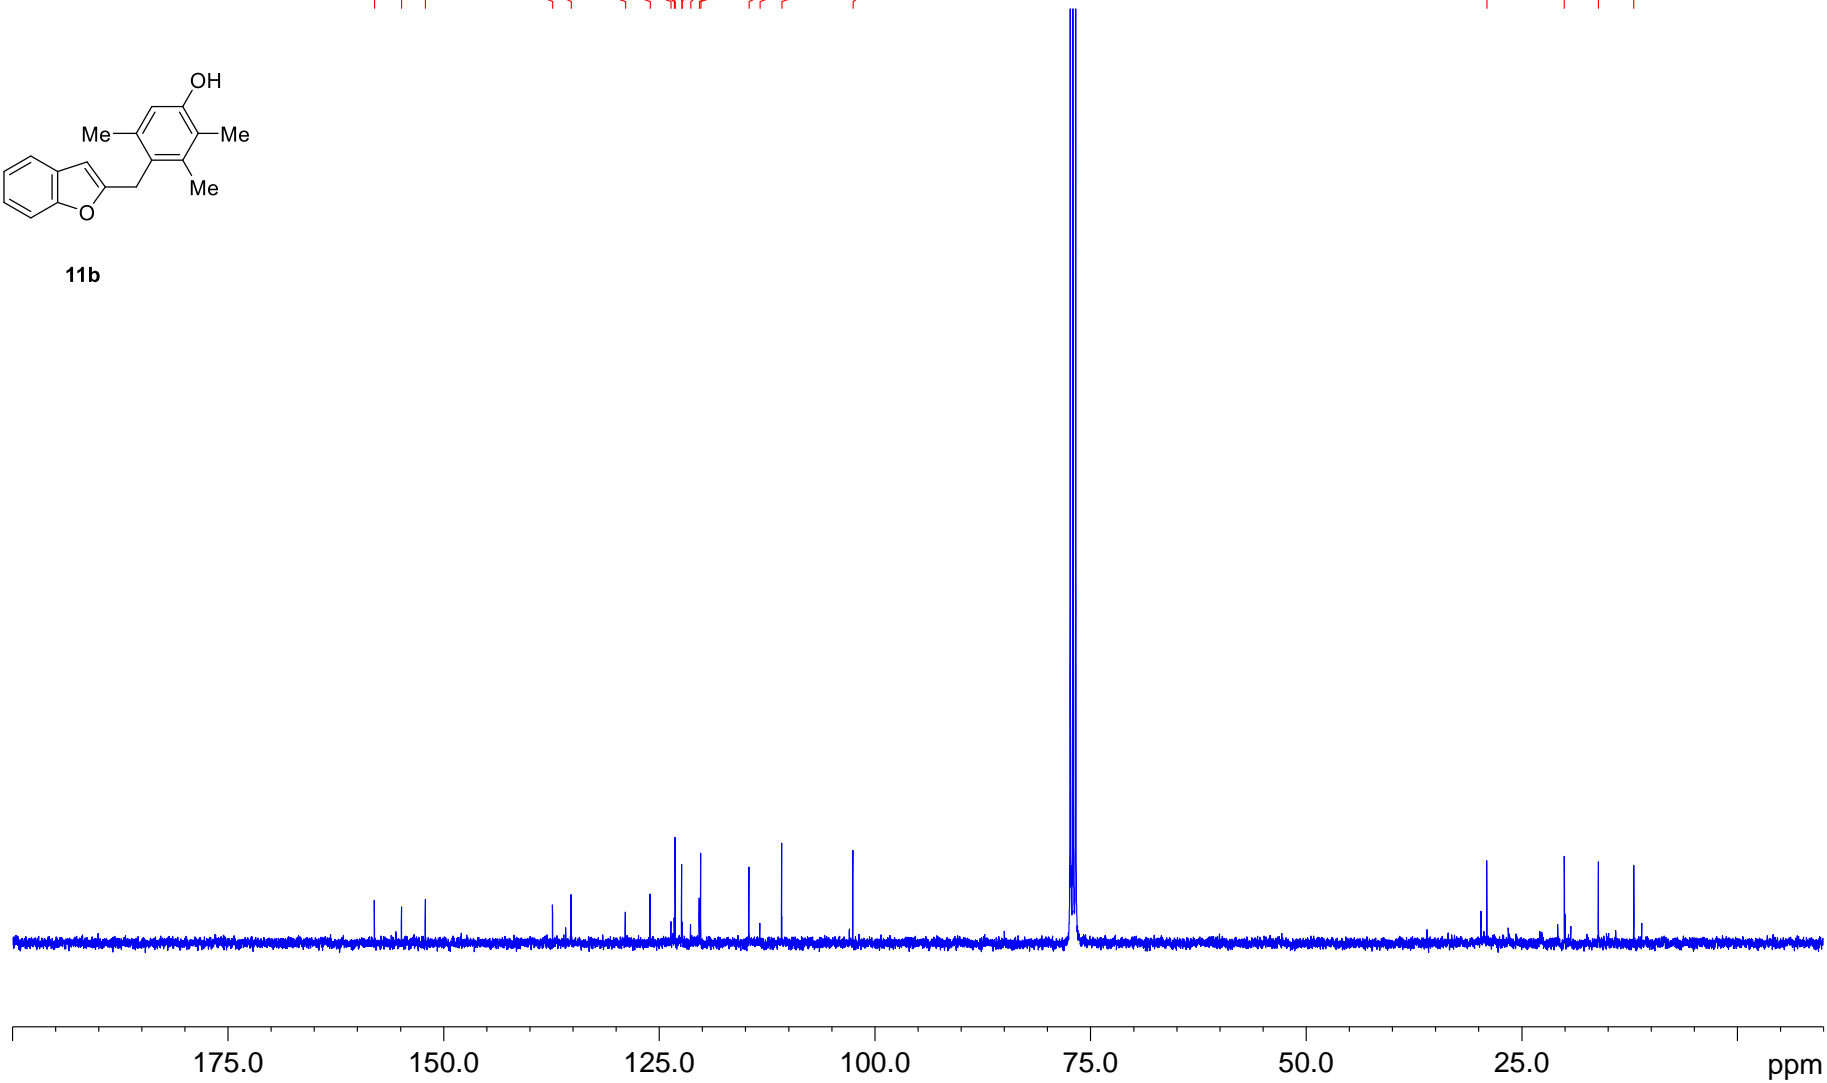



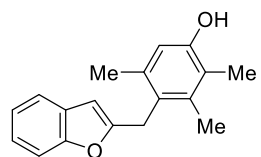

11b

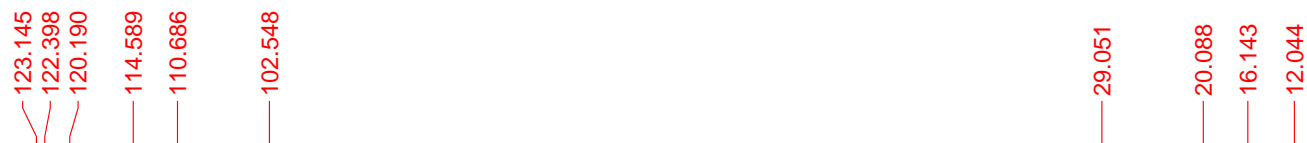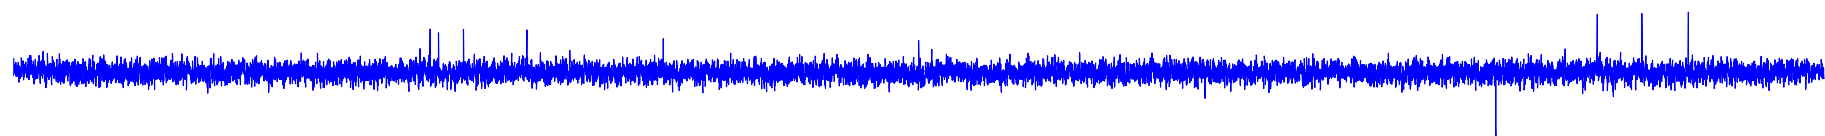

150.0

125.0

100.0

75.0

50.0

25.0

ppm

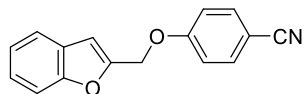

10ae

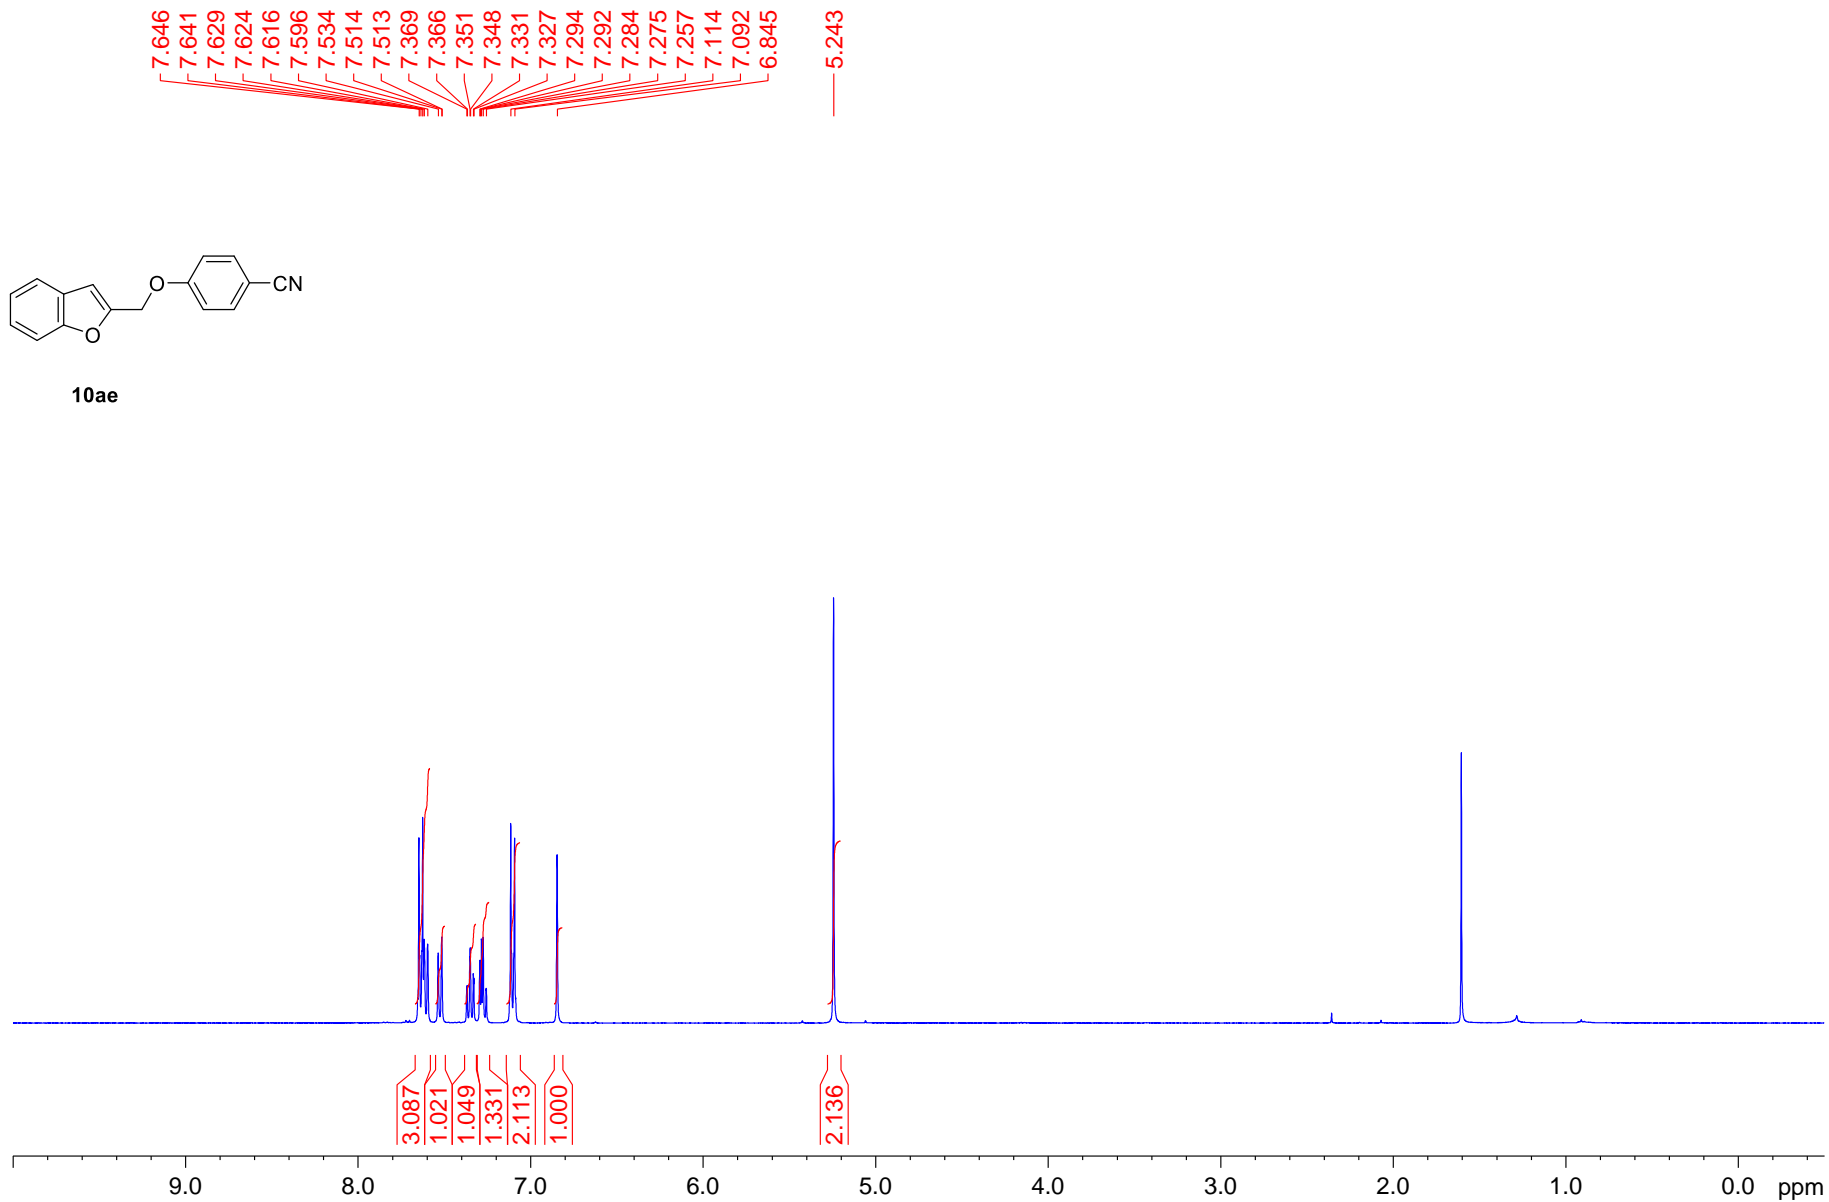

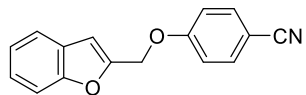

10ae

161.441  
155.262  
151.445

134.083  
133.675  
127.752  
125.034  
123.140  
122.737  
121.383  
119.006  
115.593  
111.466  
106.925  
104.825

63.118

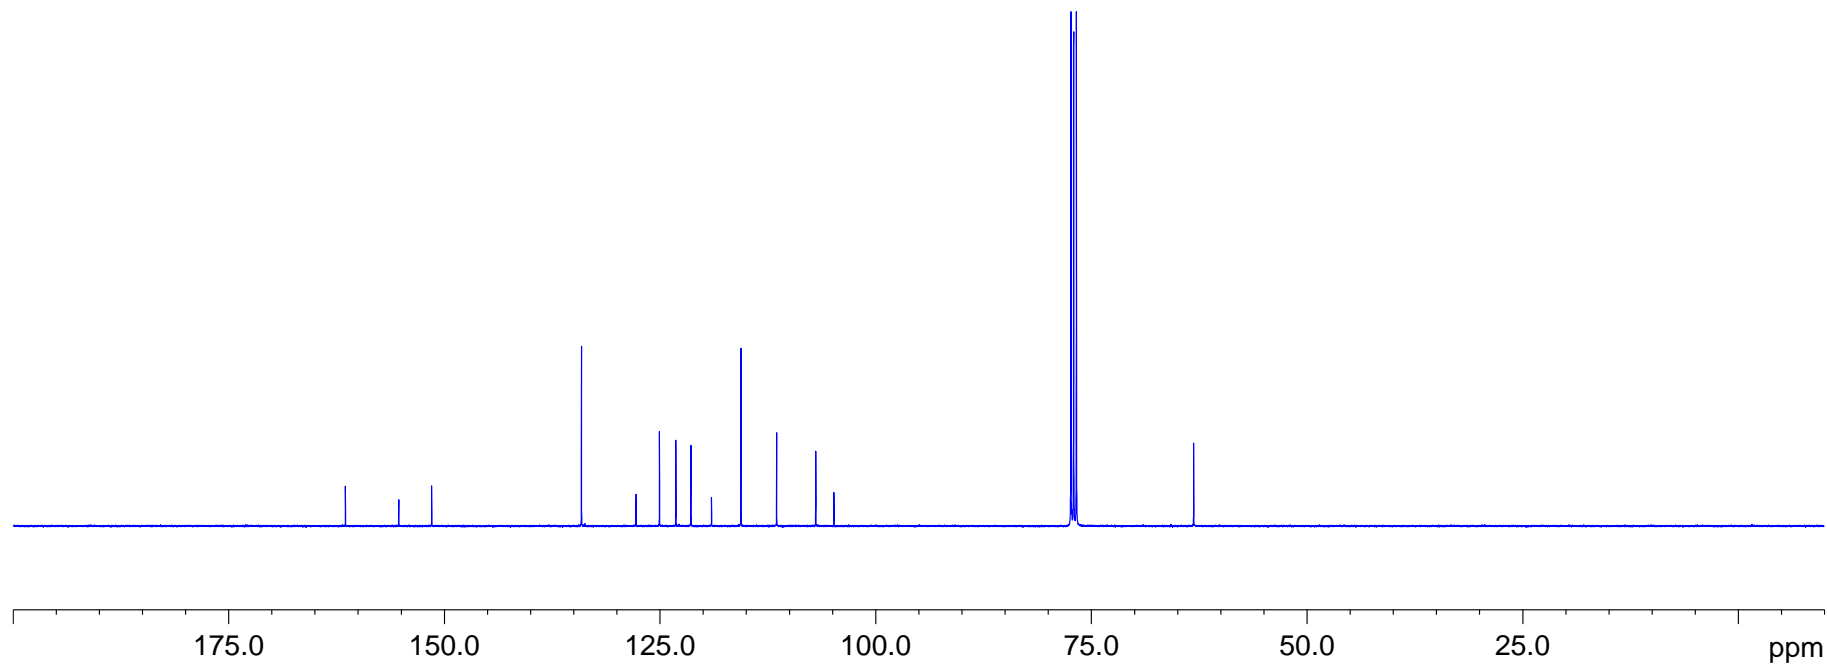

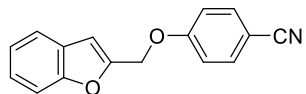

10ae

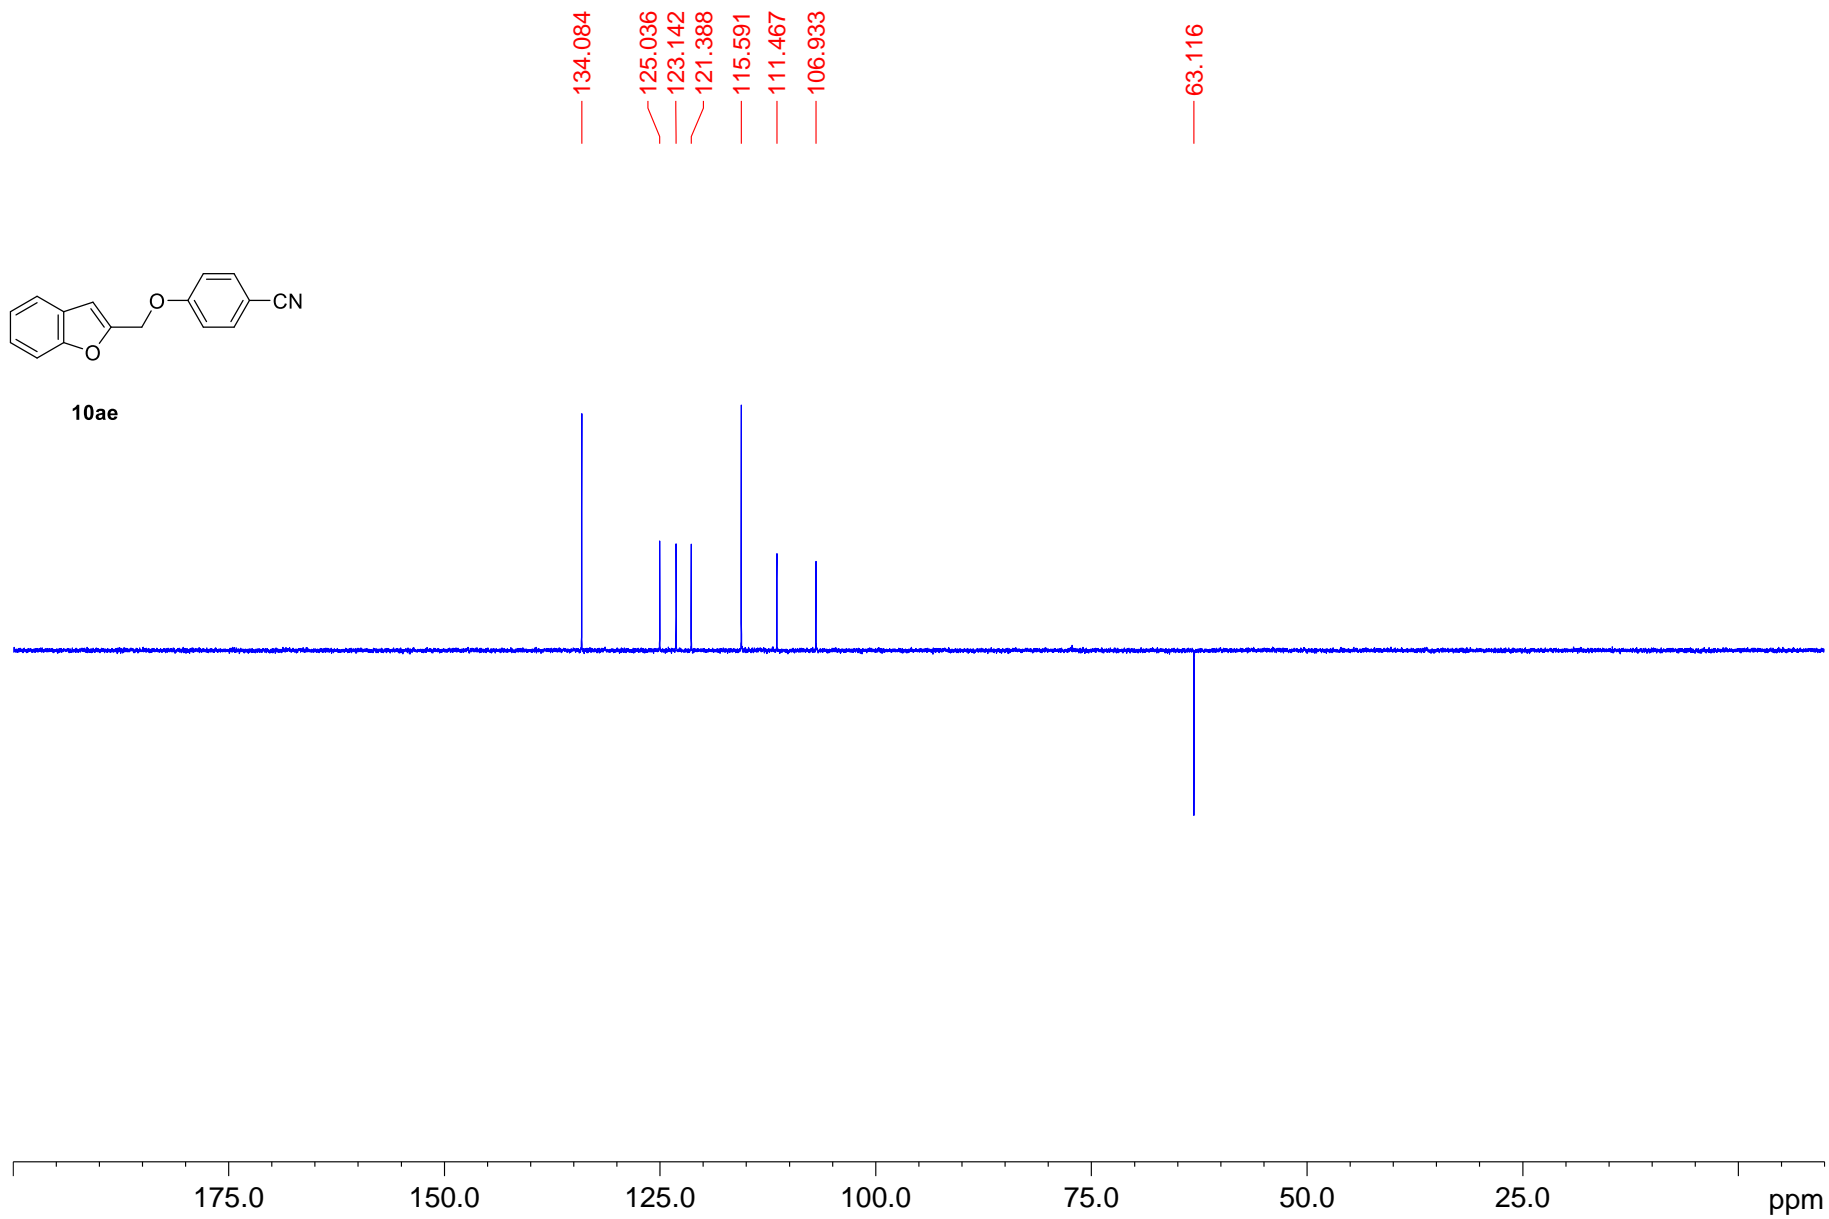

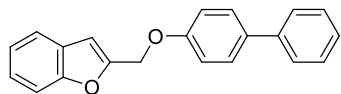

10af

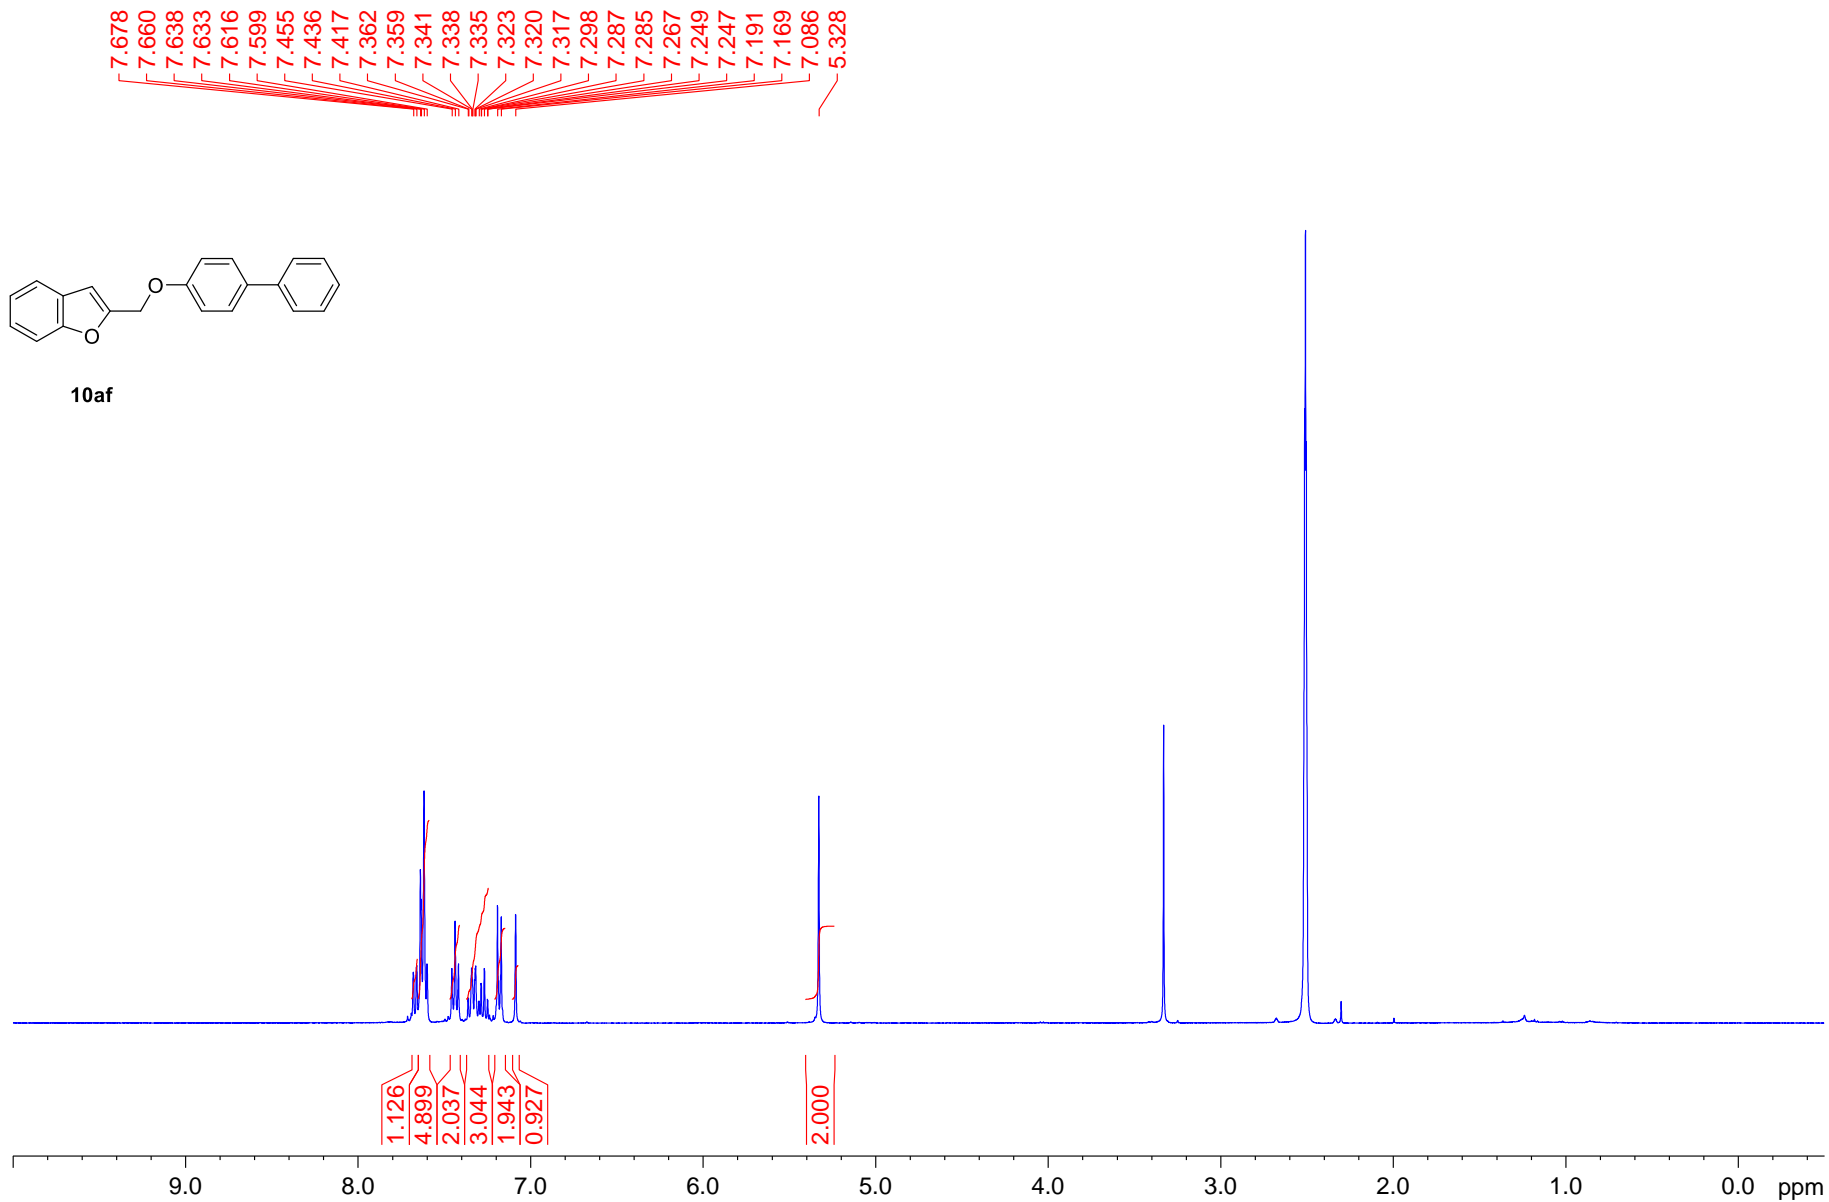



10af

- 157.946
- 155.003
- 153.506
- 140.176
- 133.636
- 129.336
- 128.279
- 128.099
- 127.279
- 126.704
- 125.253
- 123.499
- 121.929
- 115.773
- 111.701
- 107.242

62.686

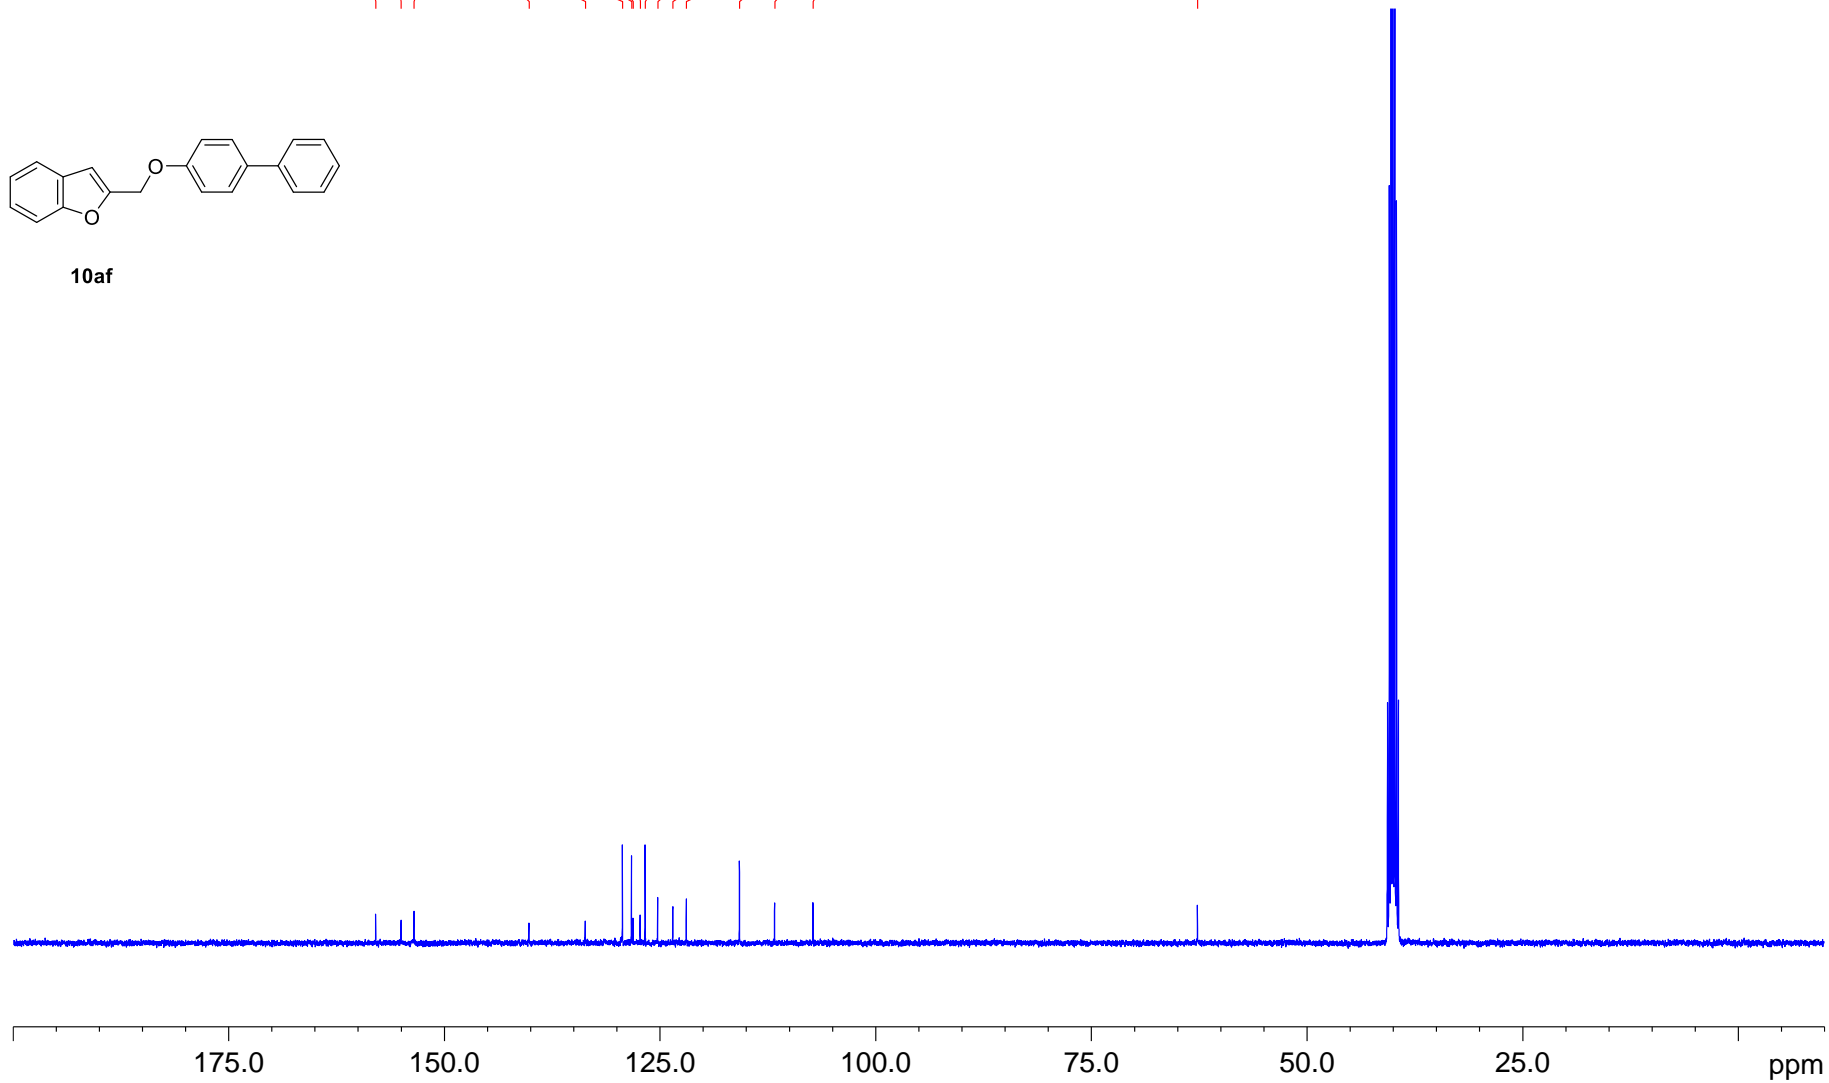



10af

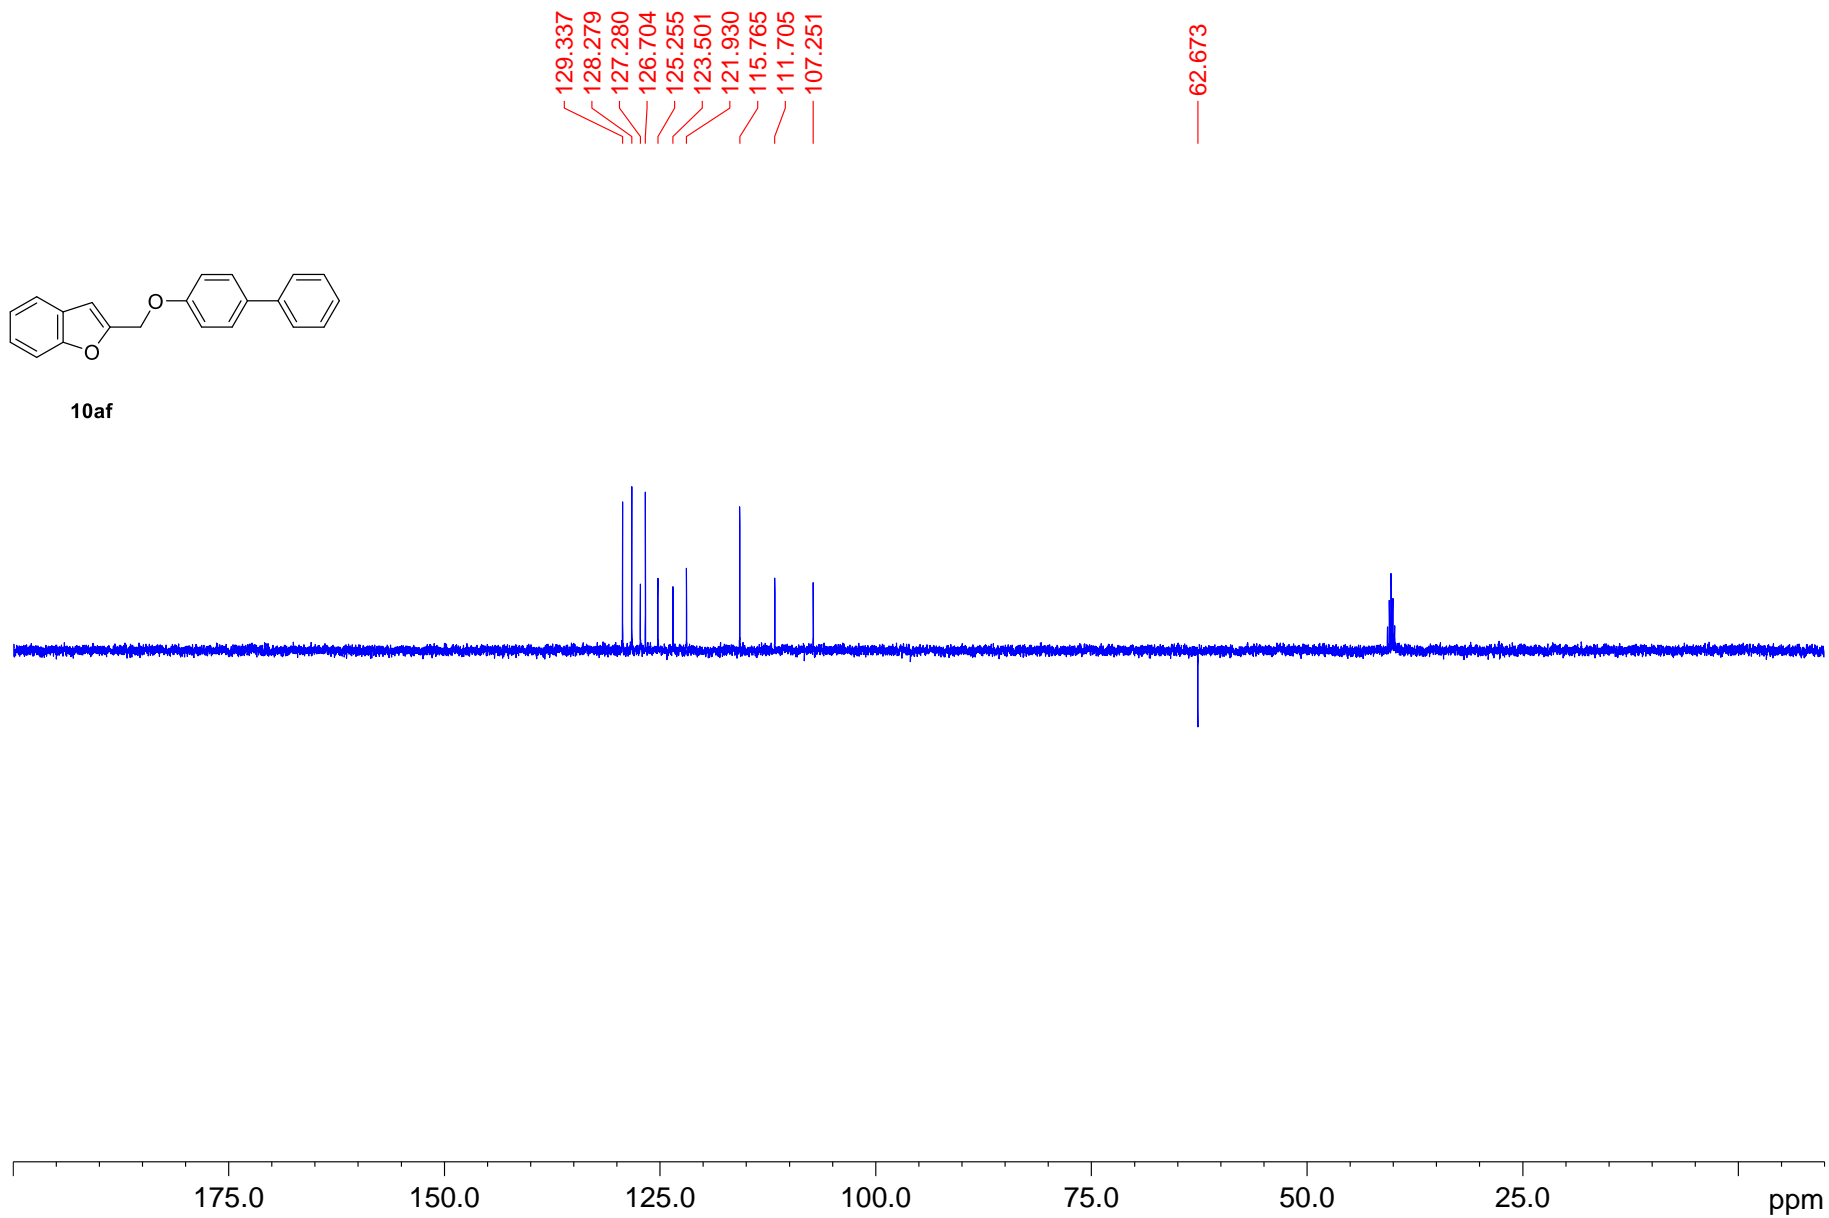

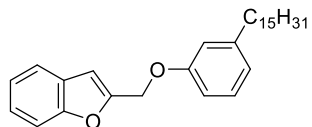

10ag

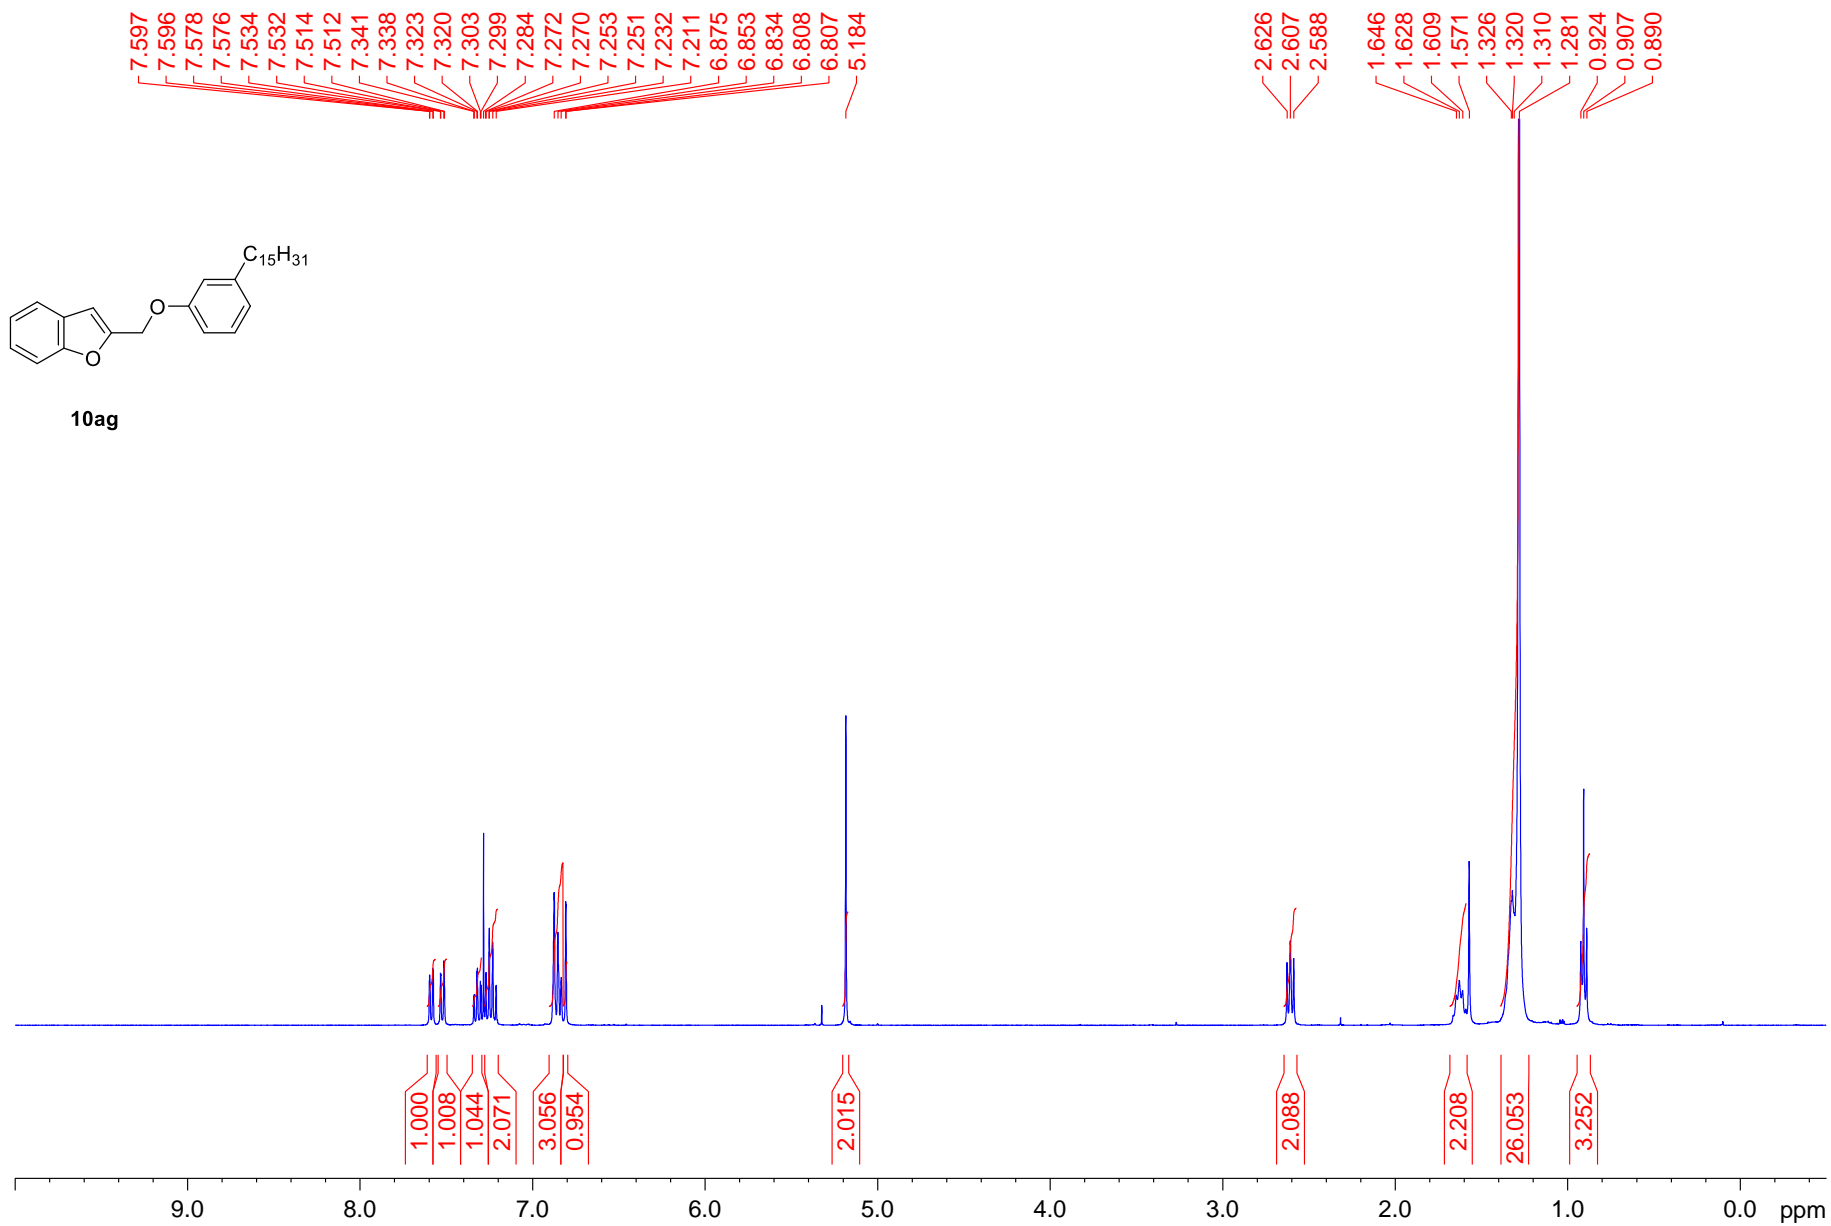





10ag

- 158.293
- 155.207
- 153.070
- 144.801
- 129.225
- 128.061
- 124.540
- 122.862
- 121.680
- 121.185
- 115.263
- 111.735
- 111.412
- 106.035
- 62.987
- 36.010
- 31.941
- 31.348
- 29.712
- 29.694
- 29.676
- 29.600
- 29.533
- 29.379
- 29.327
- 22.709
- 14.137

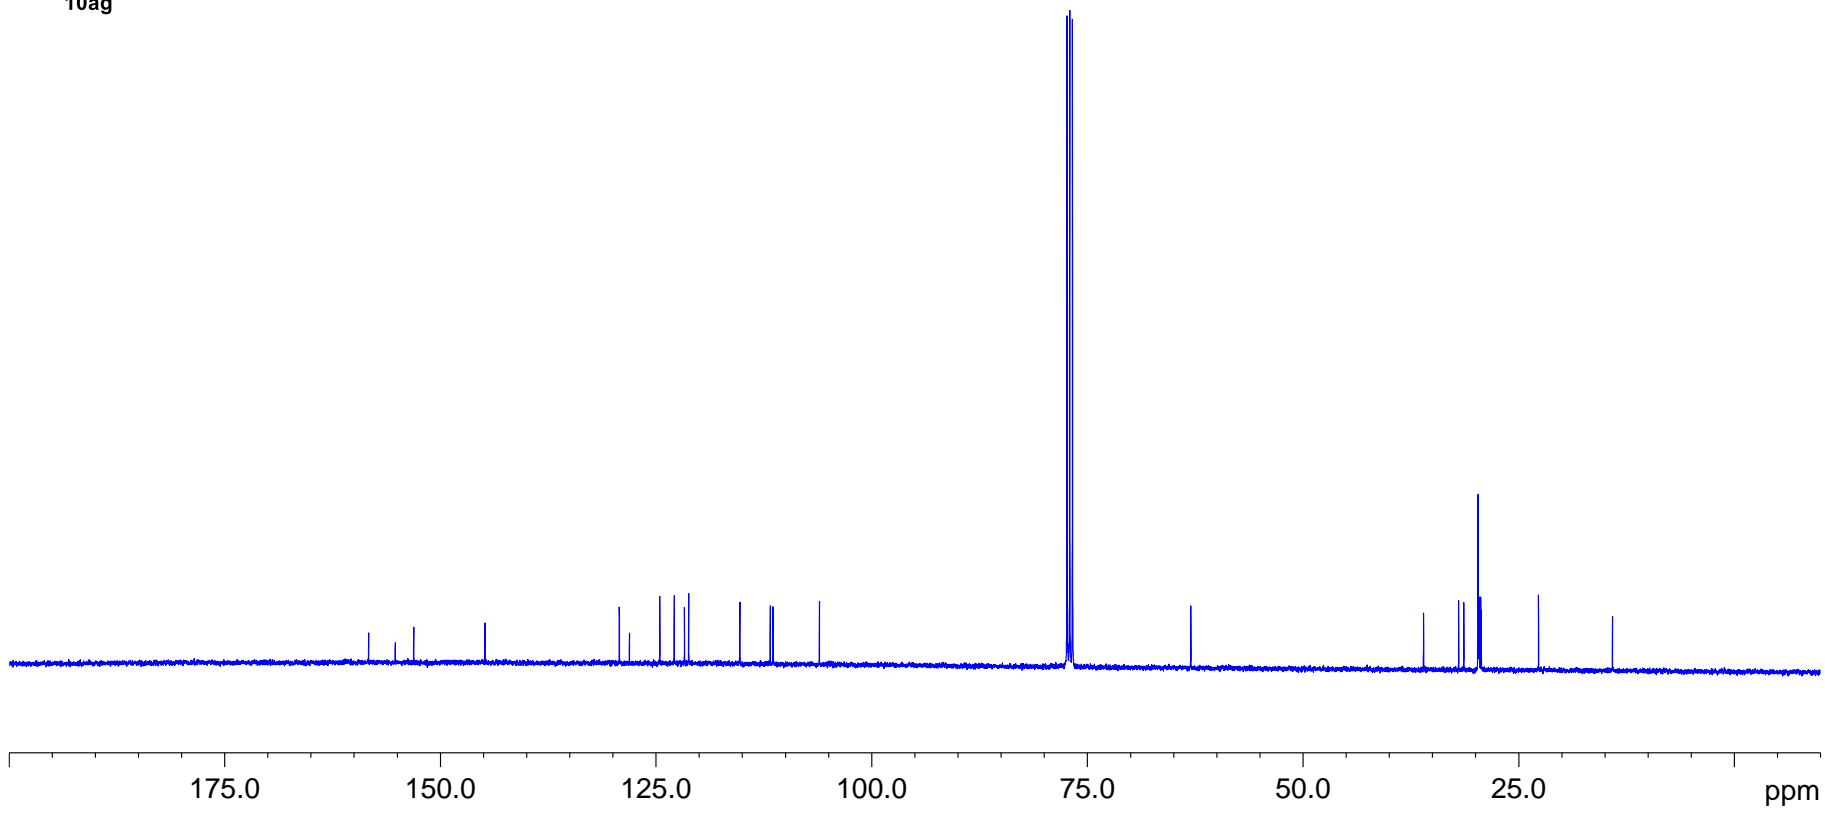

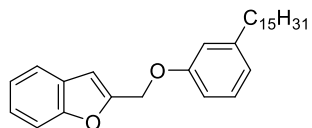

10ag

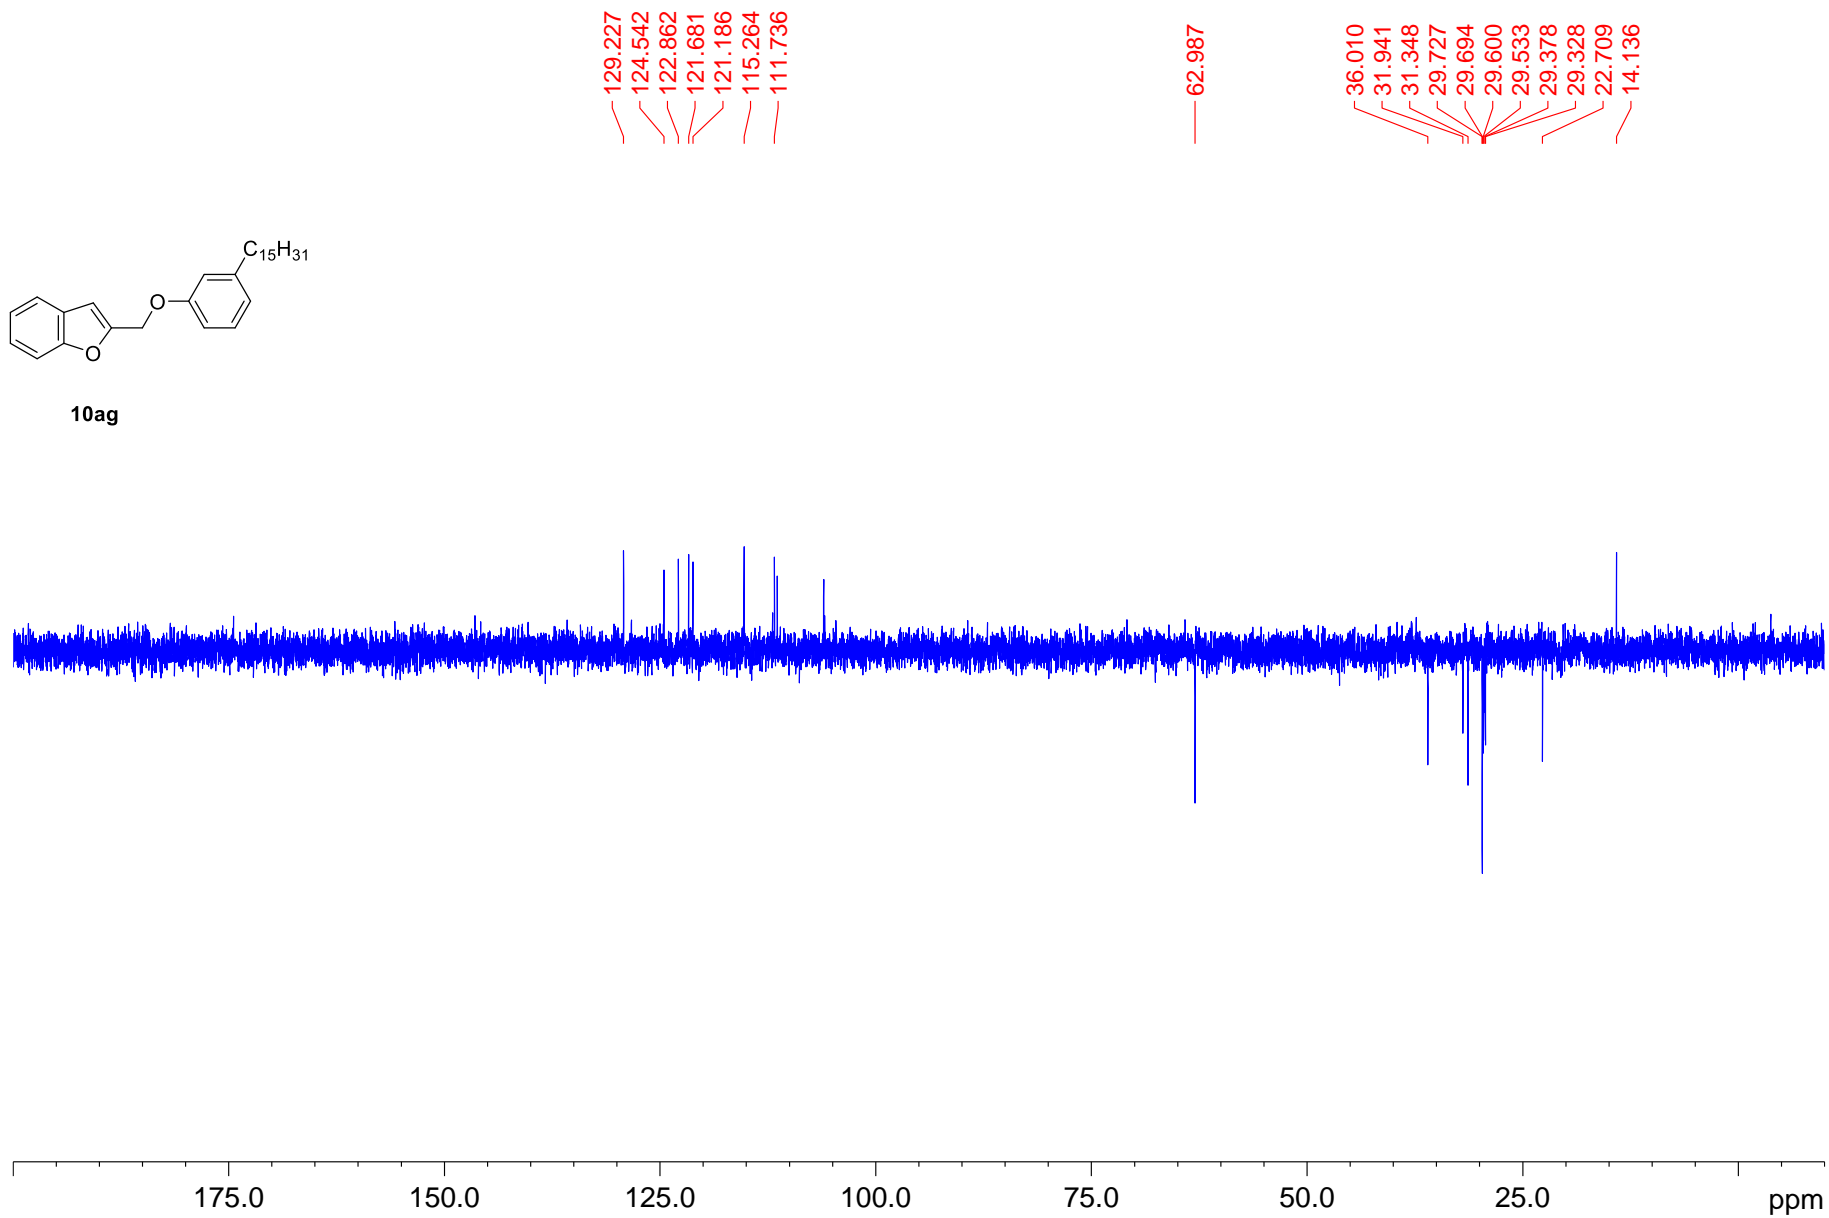

8.524  
8.518  
8.273  
8.267  
8.250  
8.244  
7.609  
7.586  
7.284  
6.986  
6.964  
6.928  
6.927  
6.892  
6.869  
6.804  
6.797

5.170

3.803  
3.784

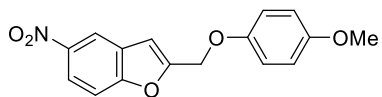

10ba

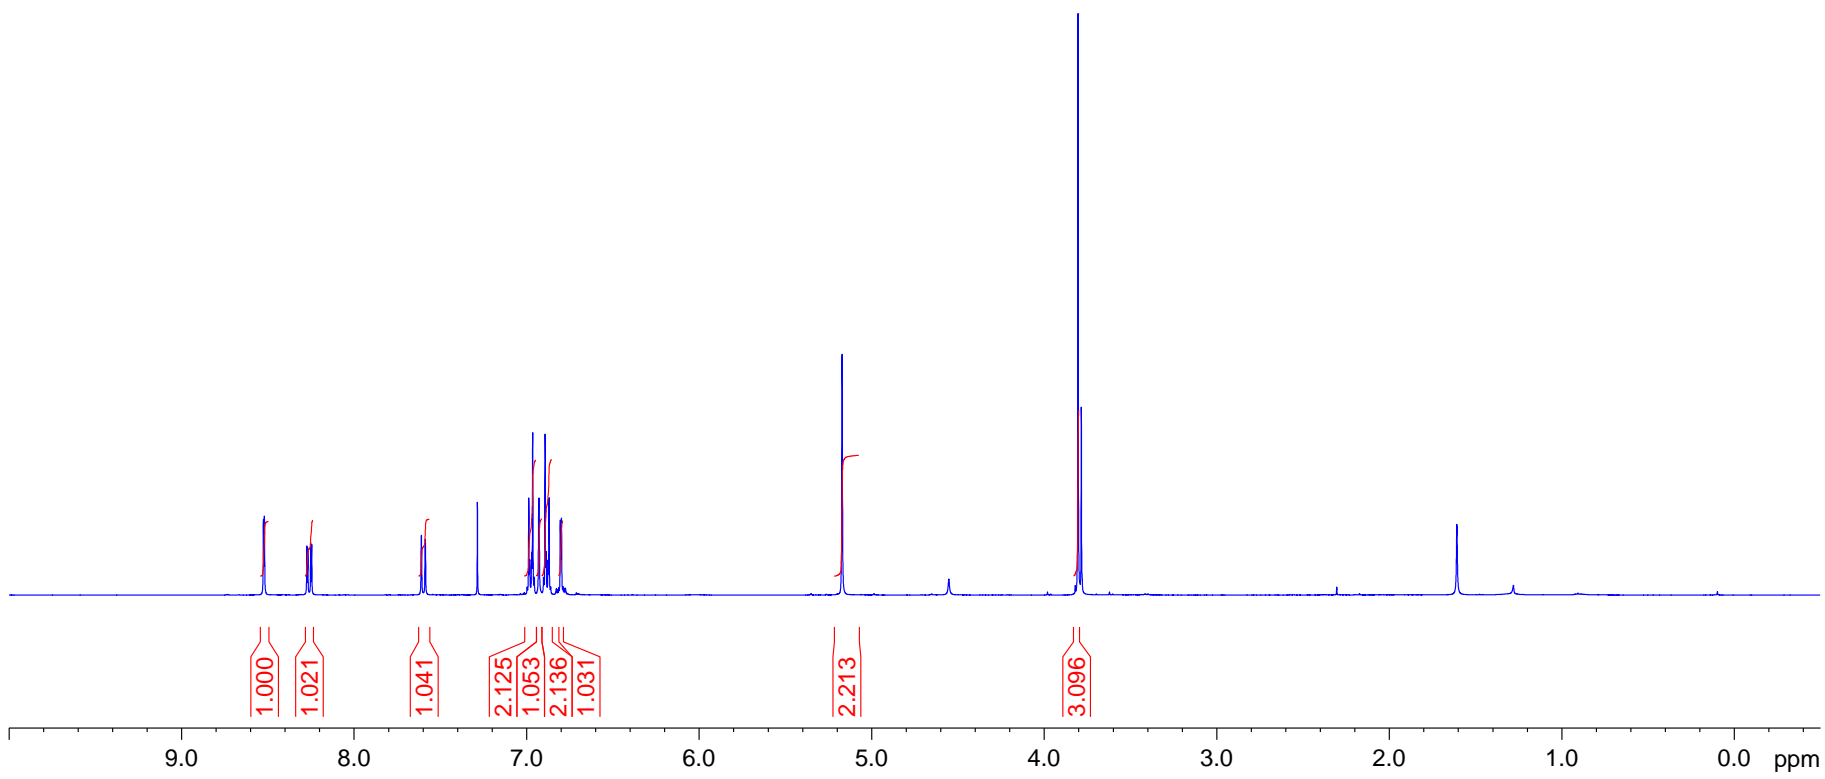

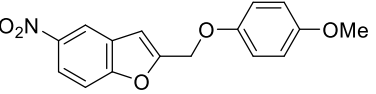

10ba

157.891  
156.824  
154.666  
152.088  
144.283

128.448  
120.472  
117.765  
116.206  
116.027  
114.823  
111.773  
106.525

63.722

55.711

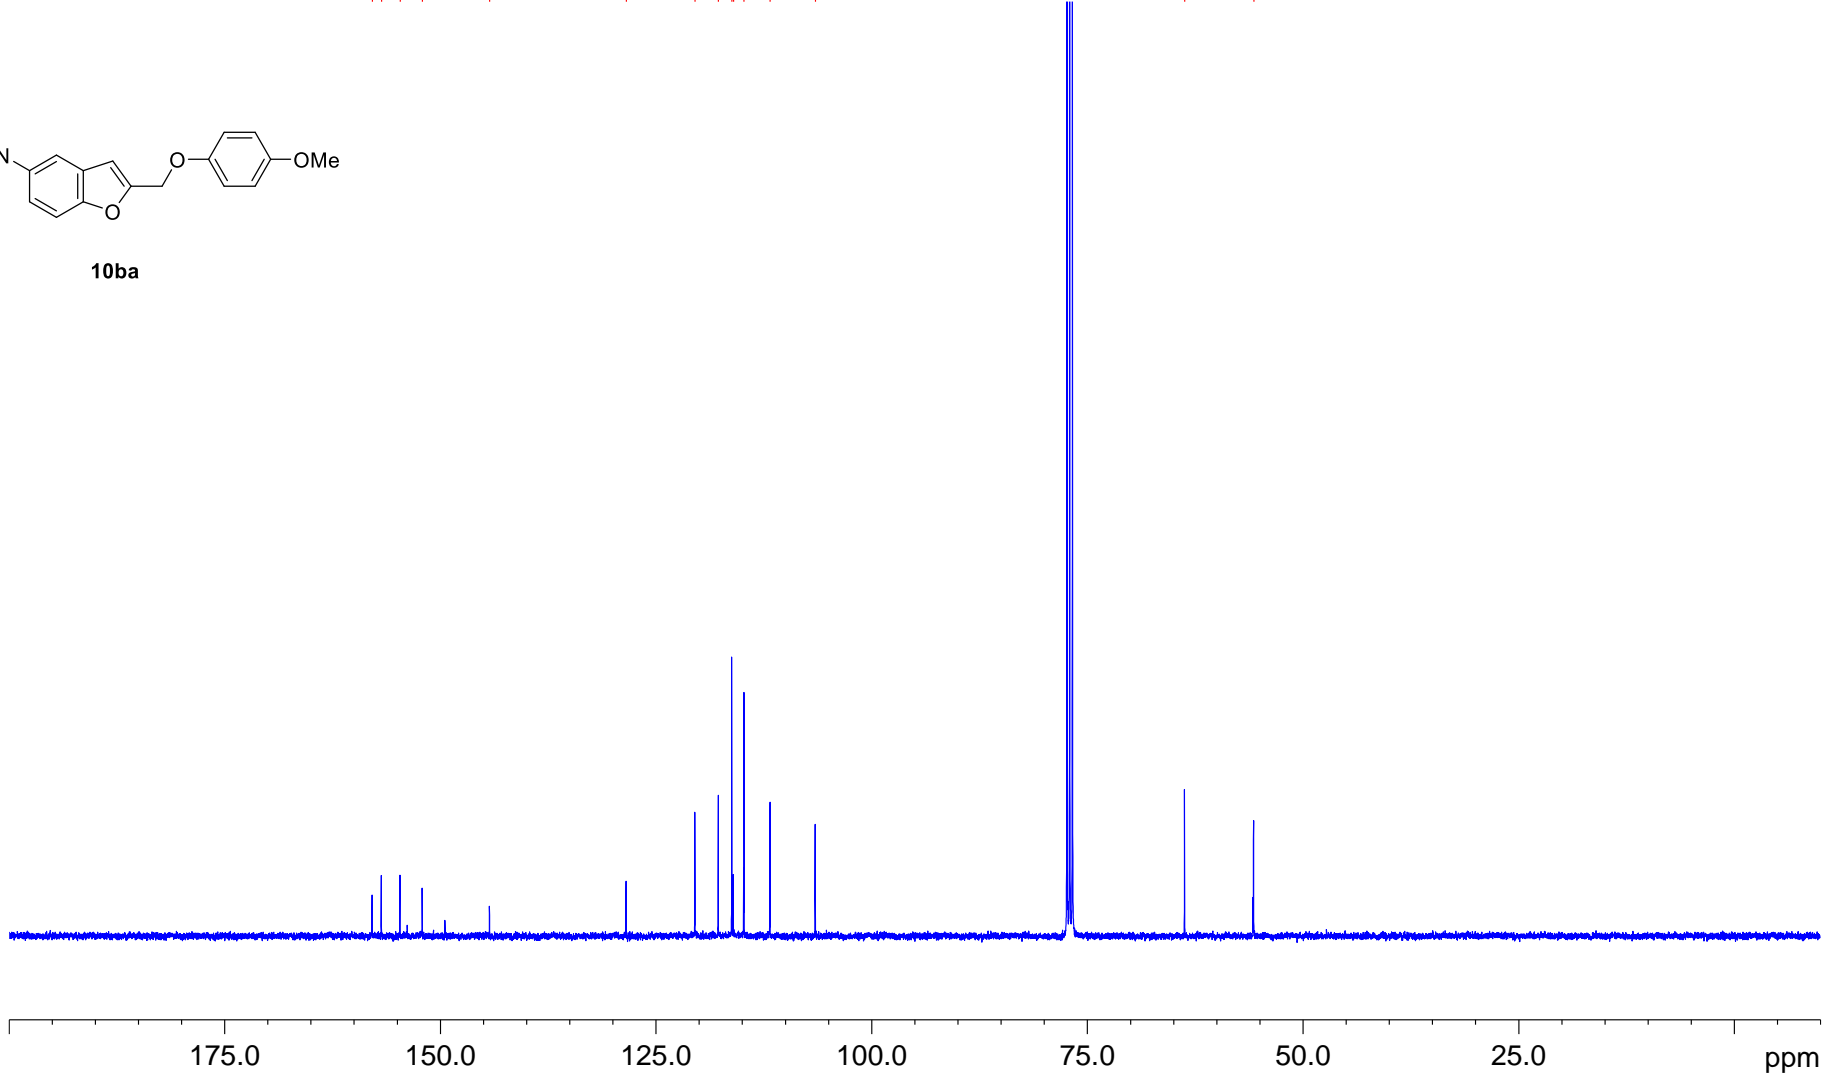

120.473  
117.765  
116.206  
114.822  
114.778  
111.773  
106.526

63.722

55.711

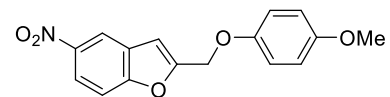

10ba

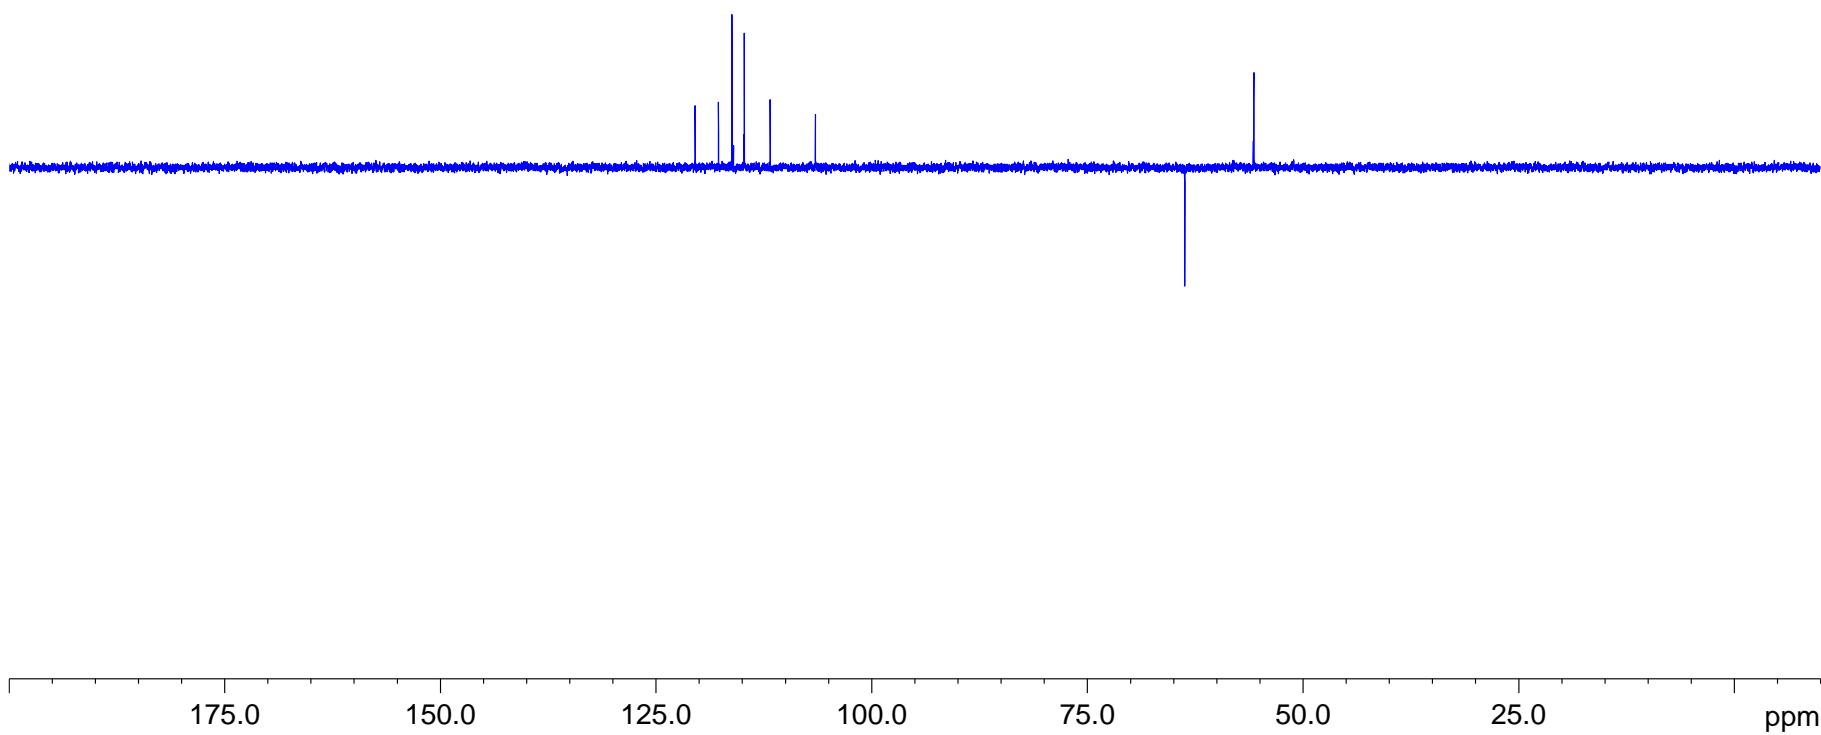

8.524  
8.518  
8.270  
8.264  
8.247  
8.242  
7.605  
7.582  
7.382  
7.376  
7.365  
7.359  
7.284  
6.992  
6.987  
6.976  
6.970  
6.952  
6.950

5.212

1.338

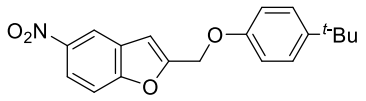

10bh

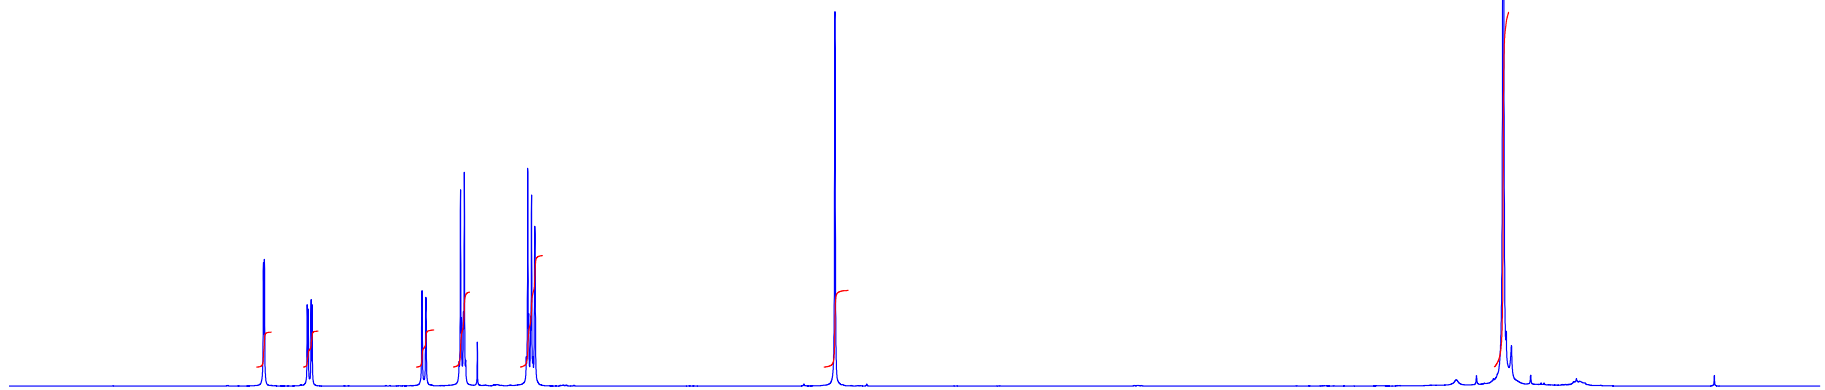

0.913

0.937

0.969

1.958

2.910

2.000

9.278

9.0 8.0 7.0 6.0 5.0 4.0 3.0 2.0 1.0 0.0 ppm

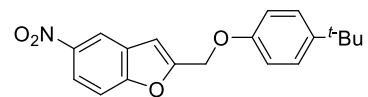

10bh

157.889  
156.817  
155.752

144.633  
144.282

128.483  
126.470

120.449  
117.745

114.331  
111.779

106.488

62.840

34.171  
31.494





10bh

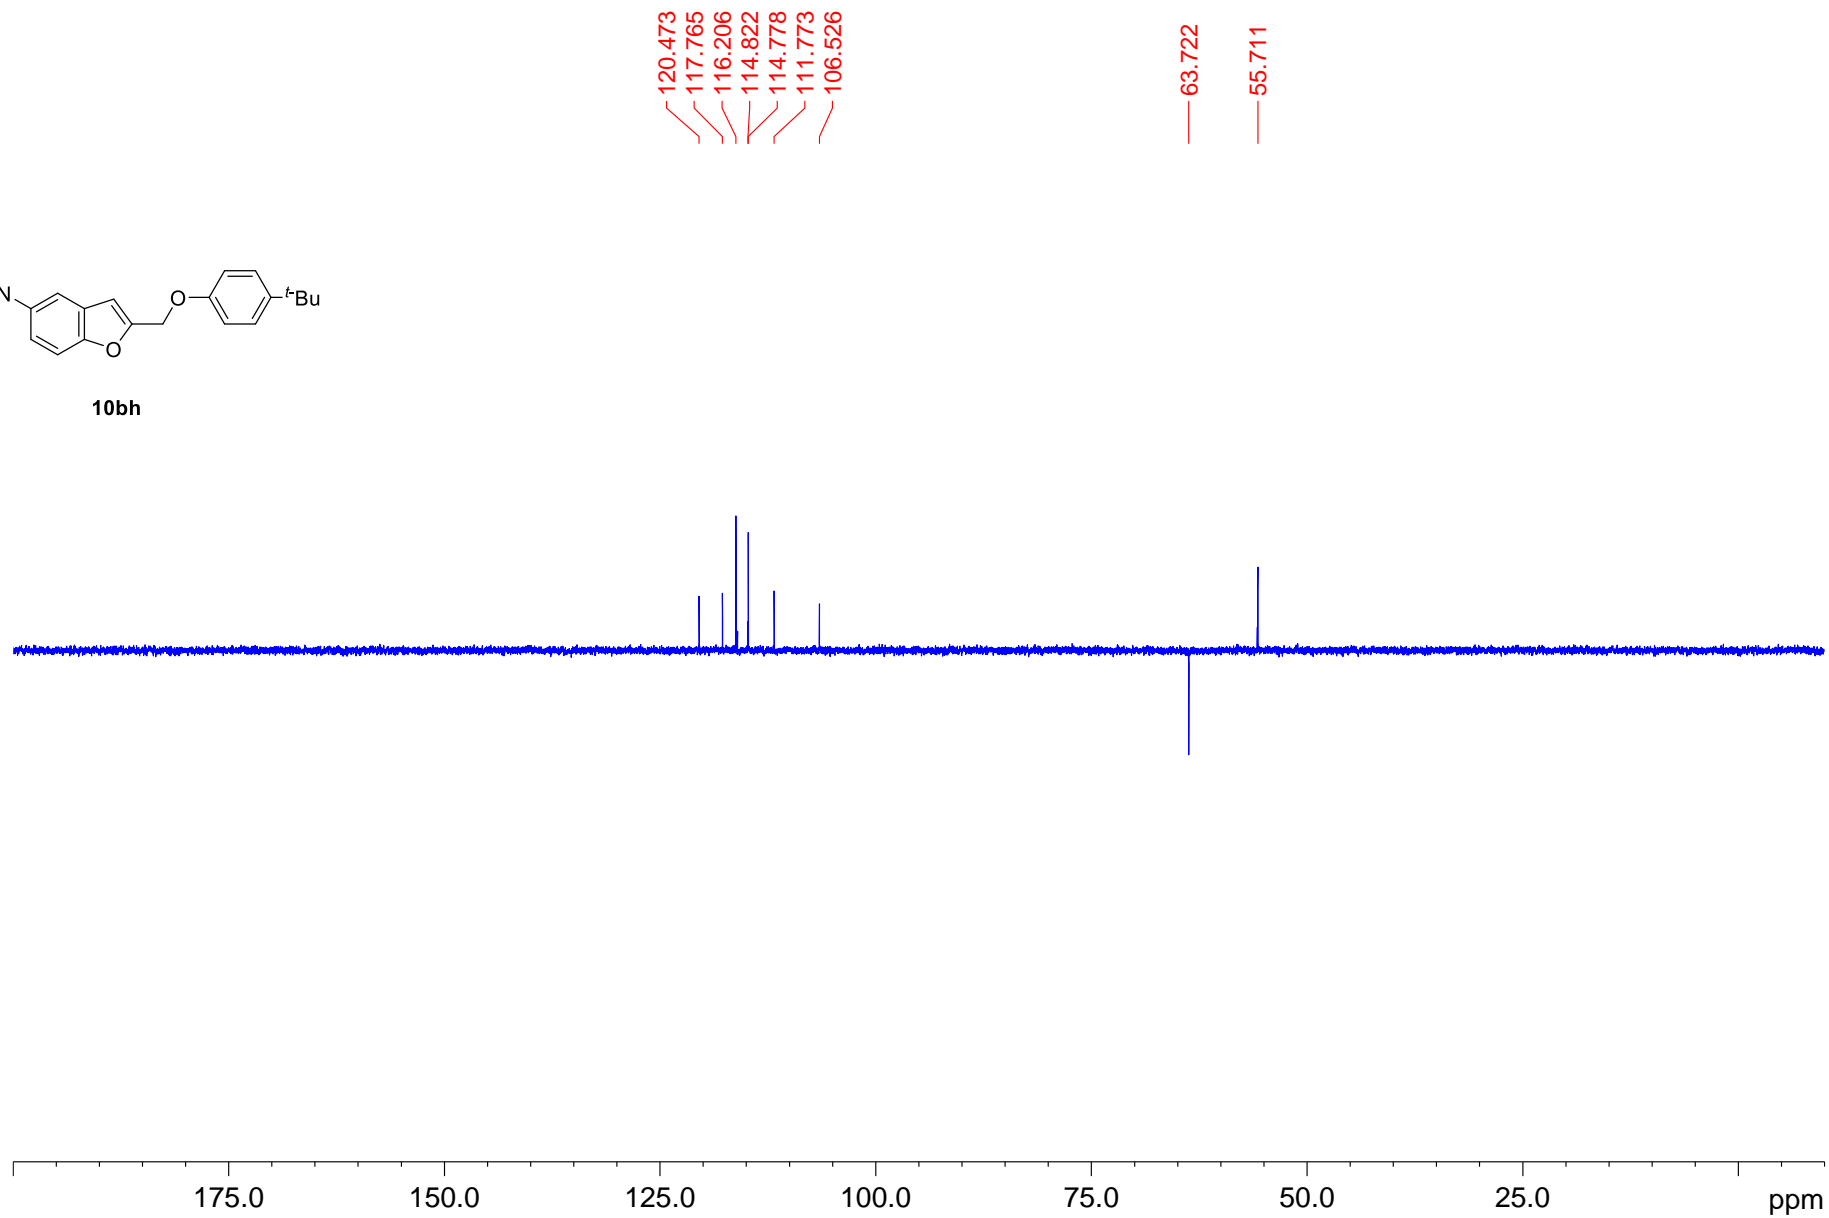



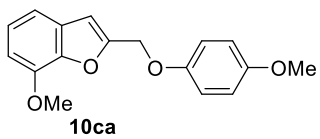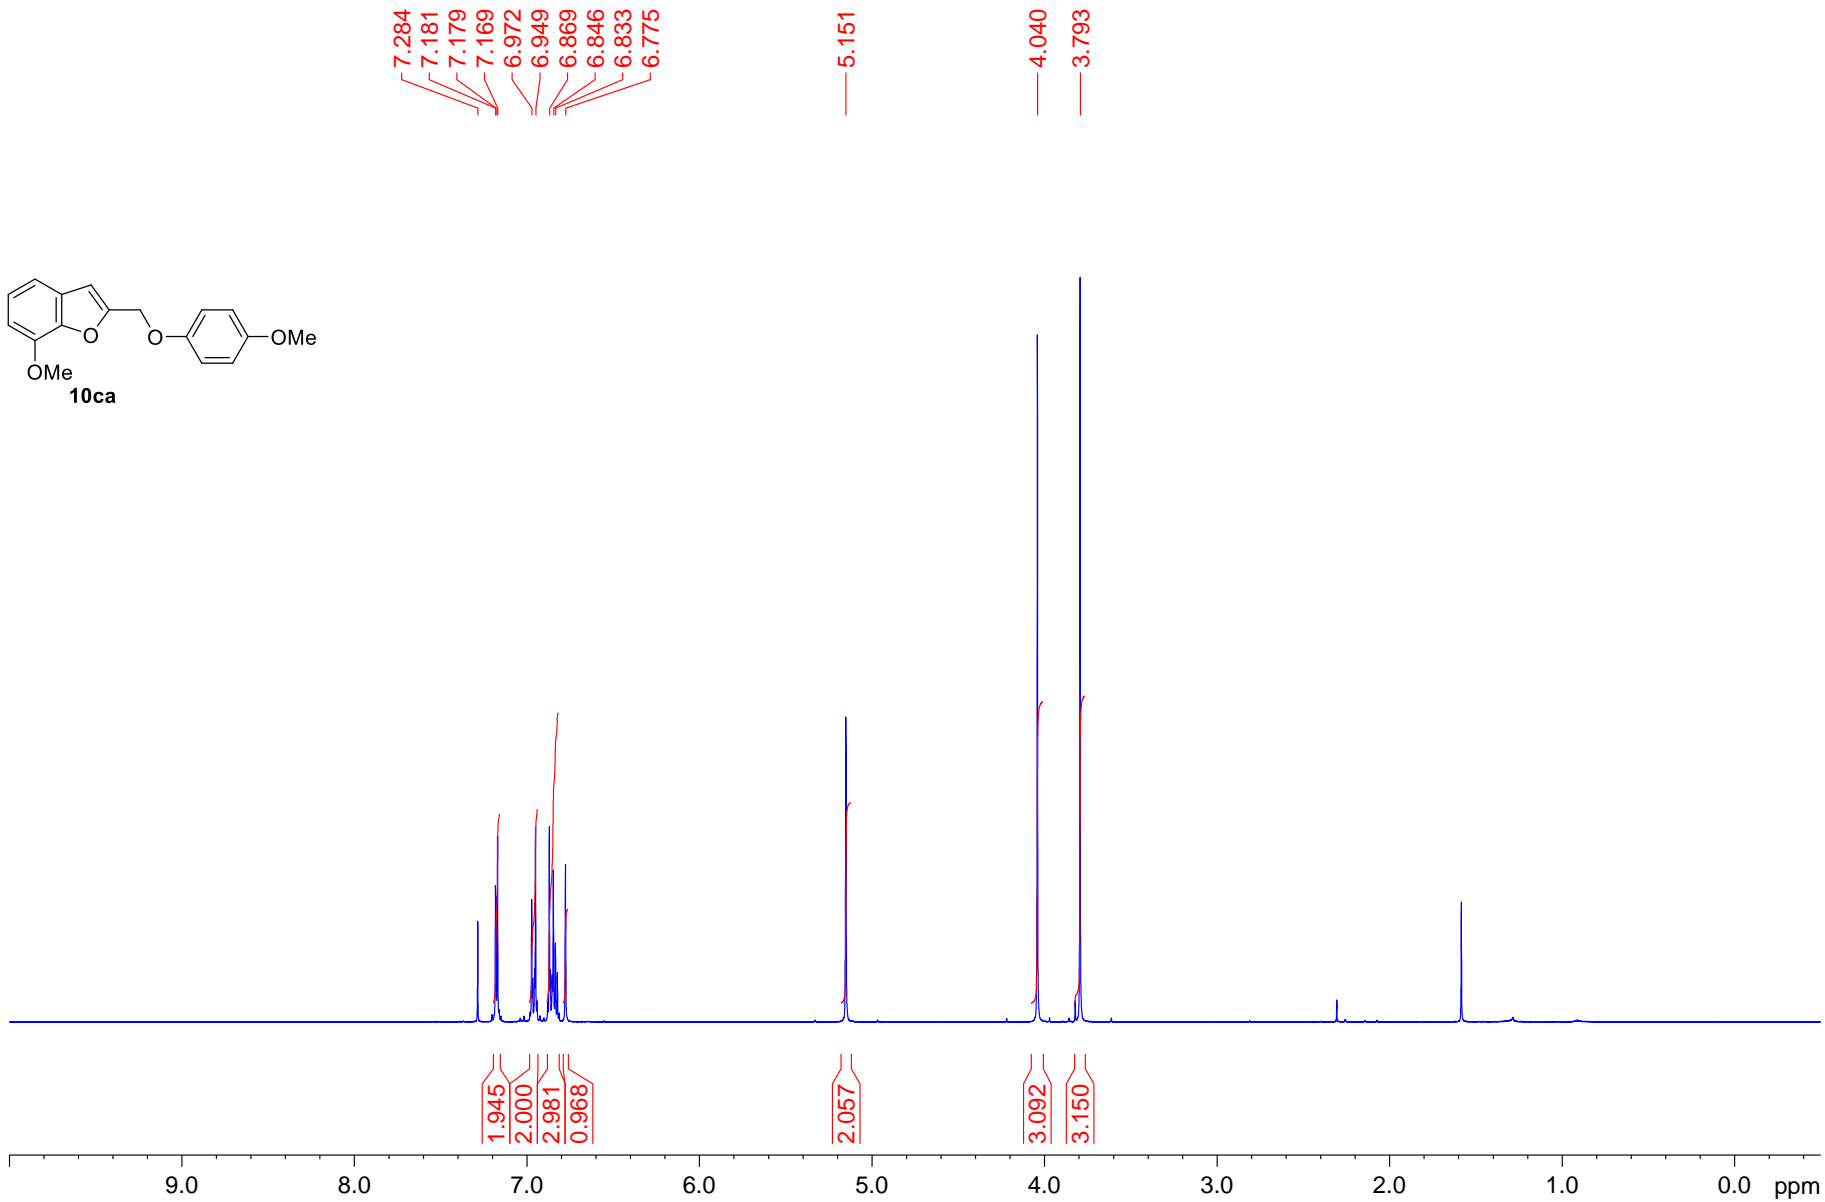

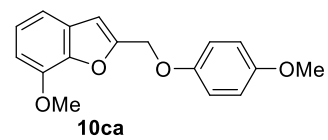

154.332  
153.410  
152.405  
145.357  
144.414  
  
129.755  
123.565  
116.138  
114.654  
113.498  
106.559  
106.208  
  
63.838  
56.031  
55.701

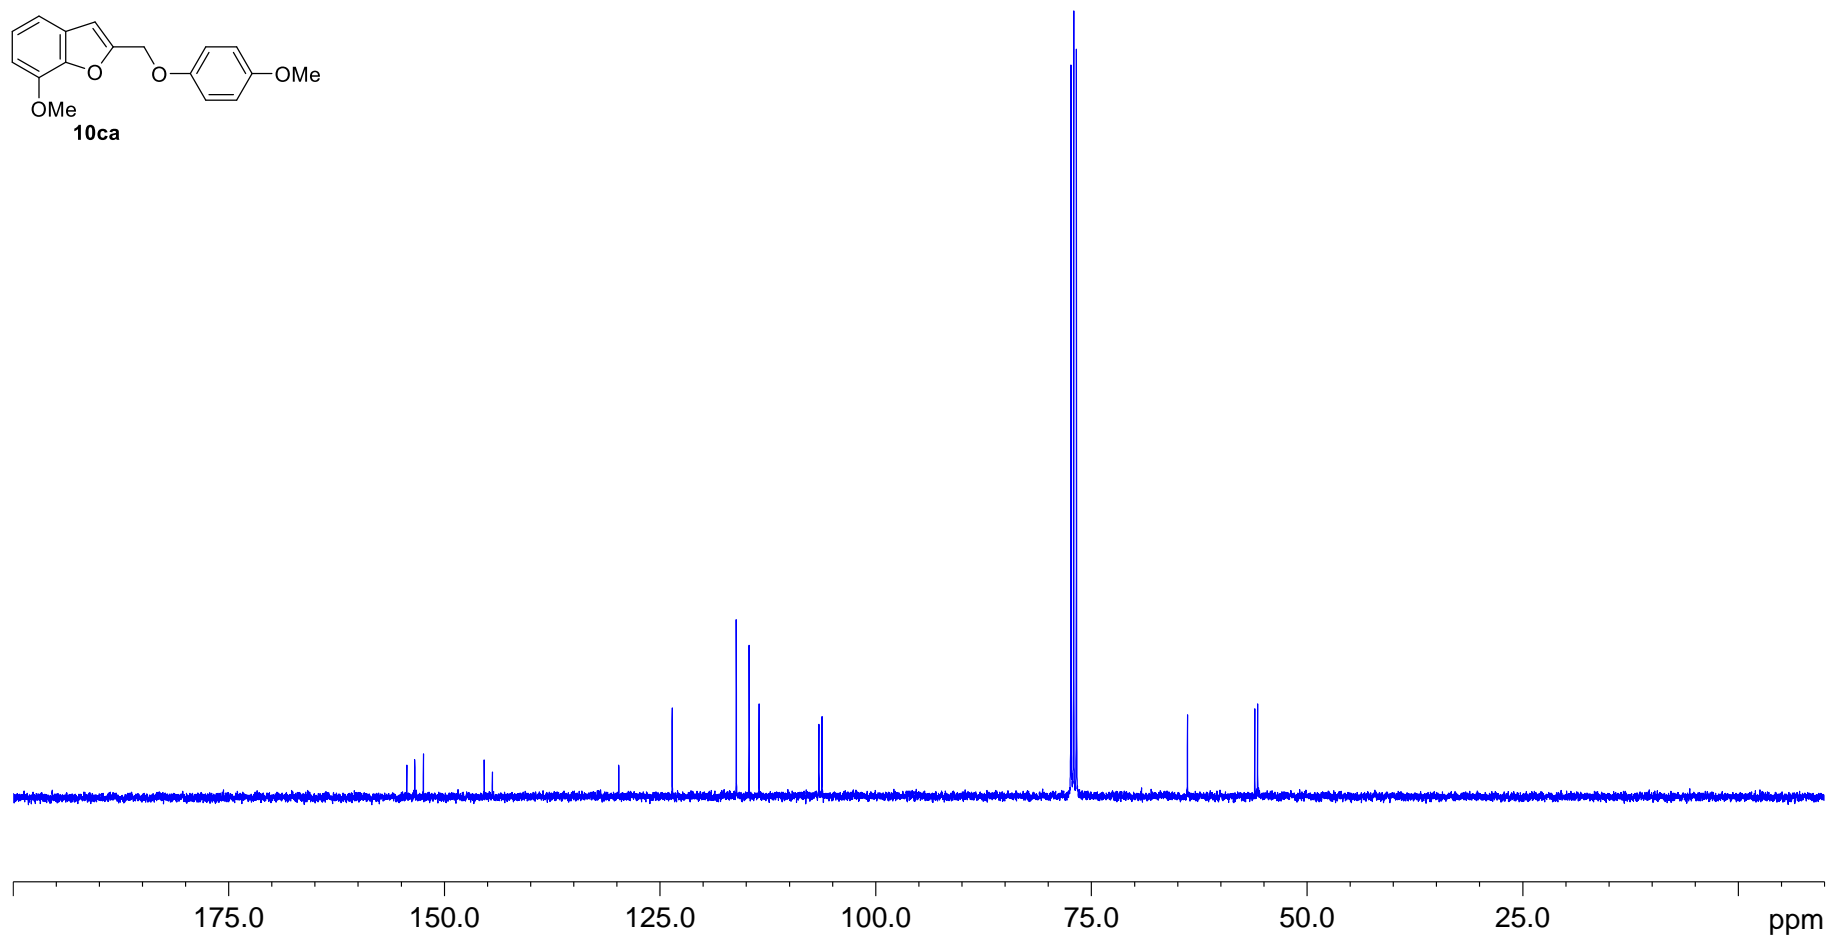

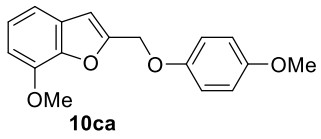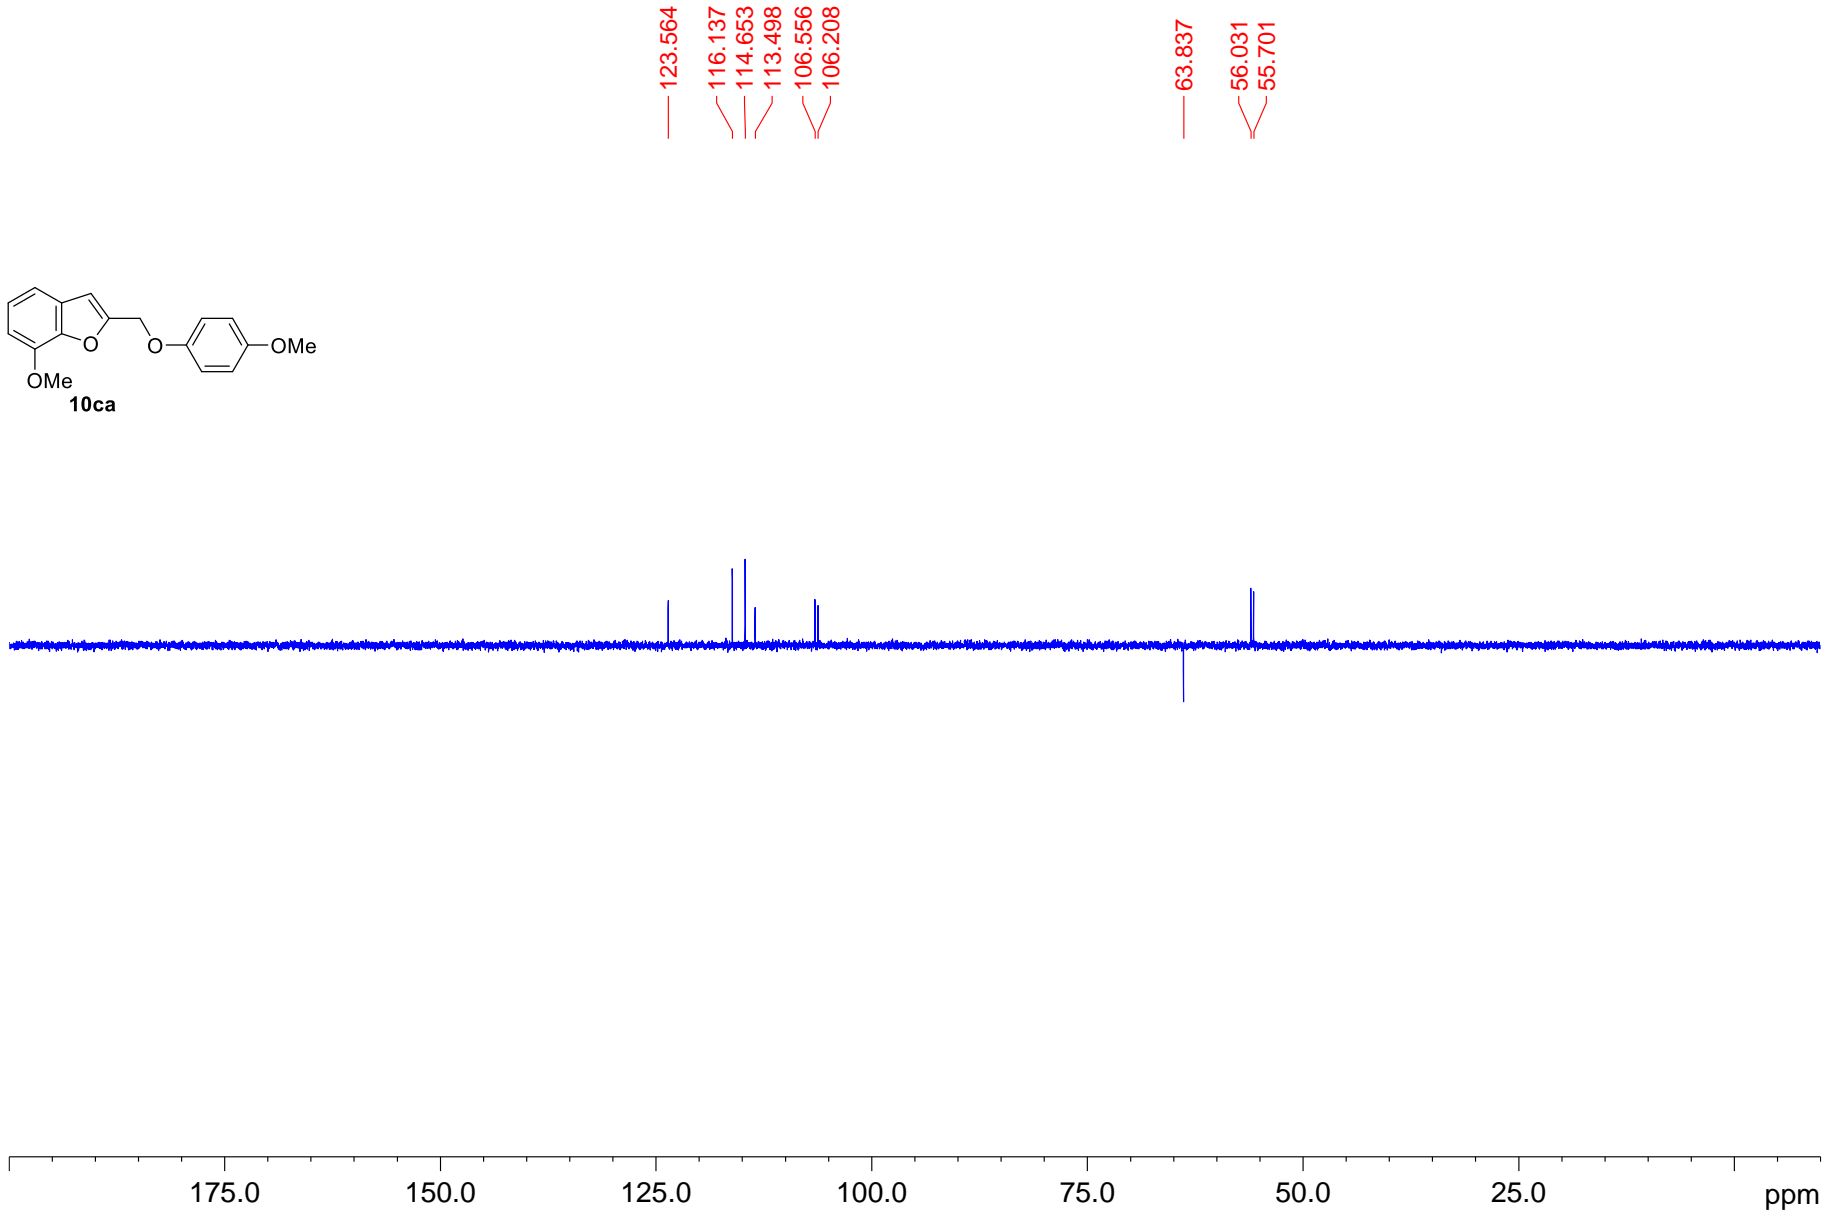

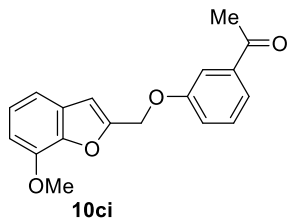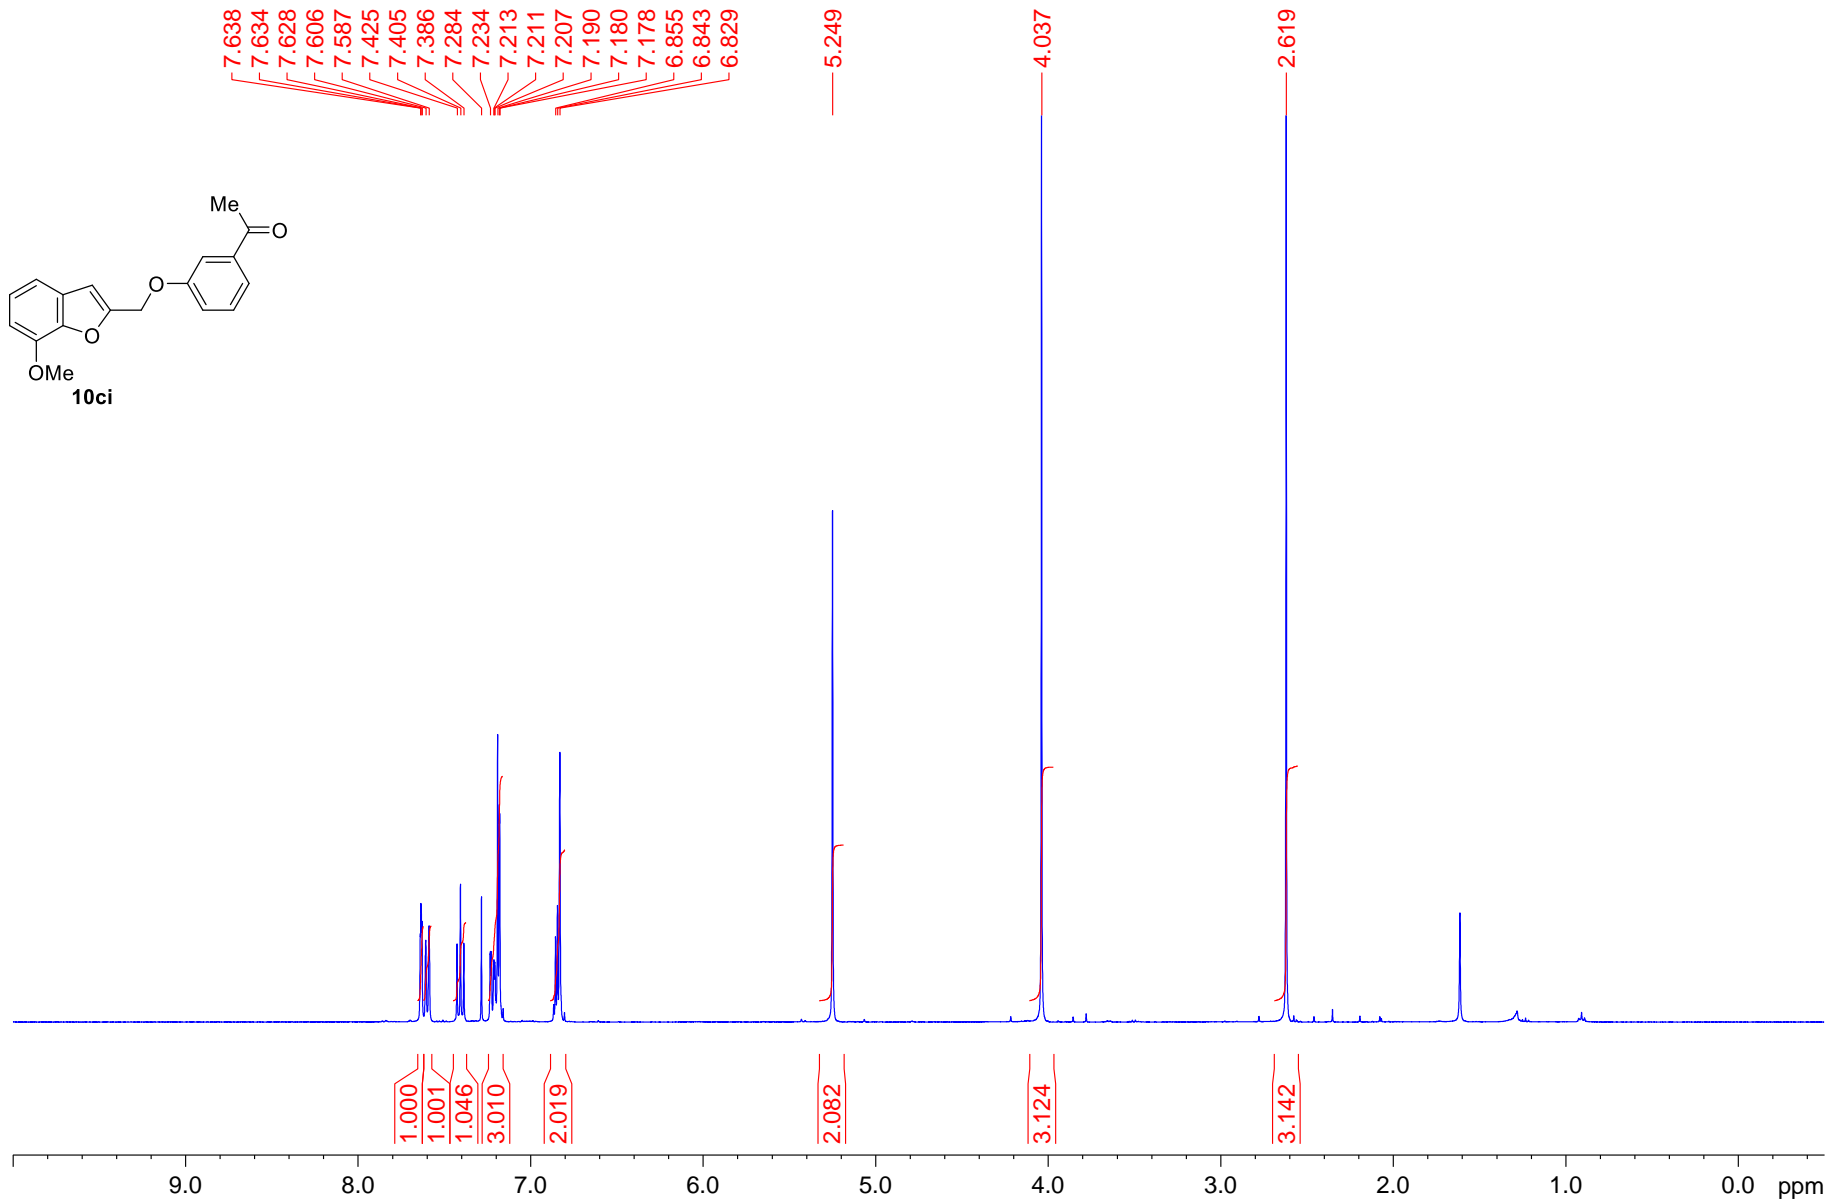

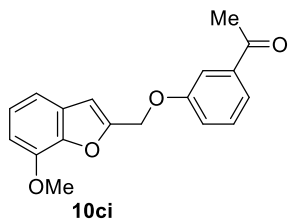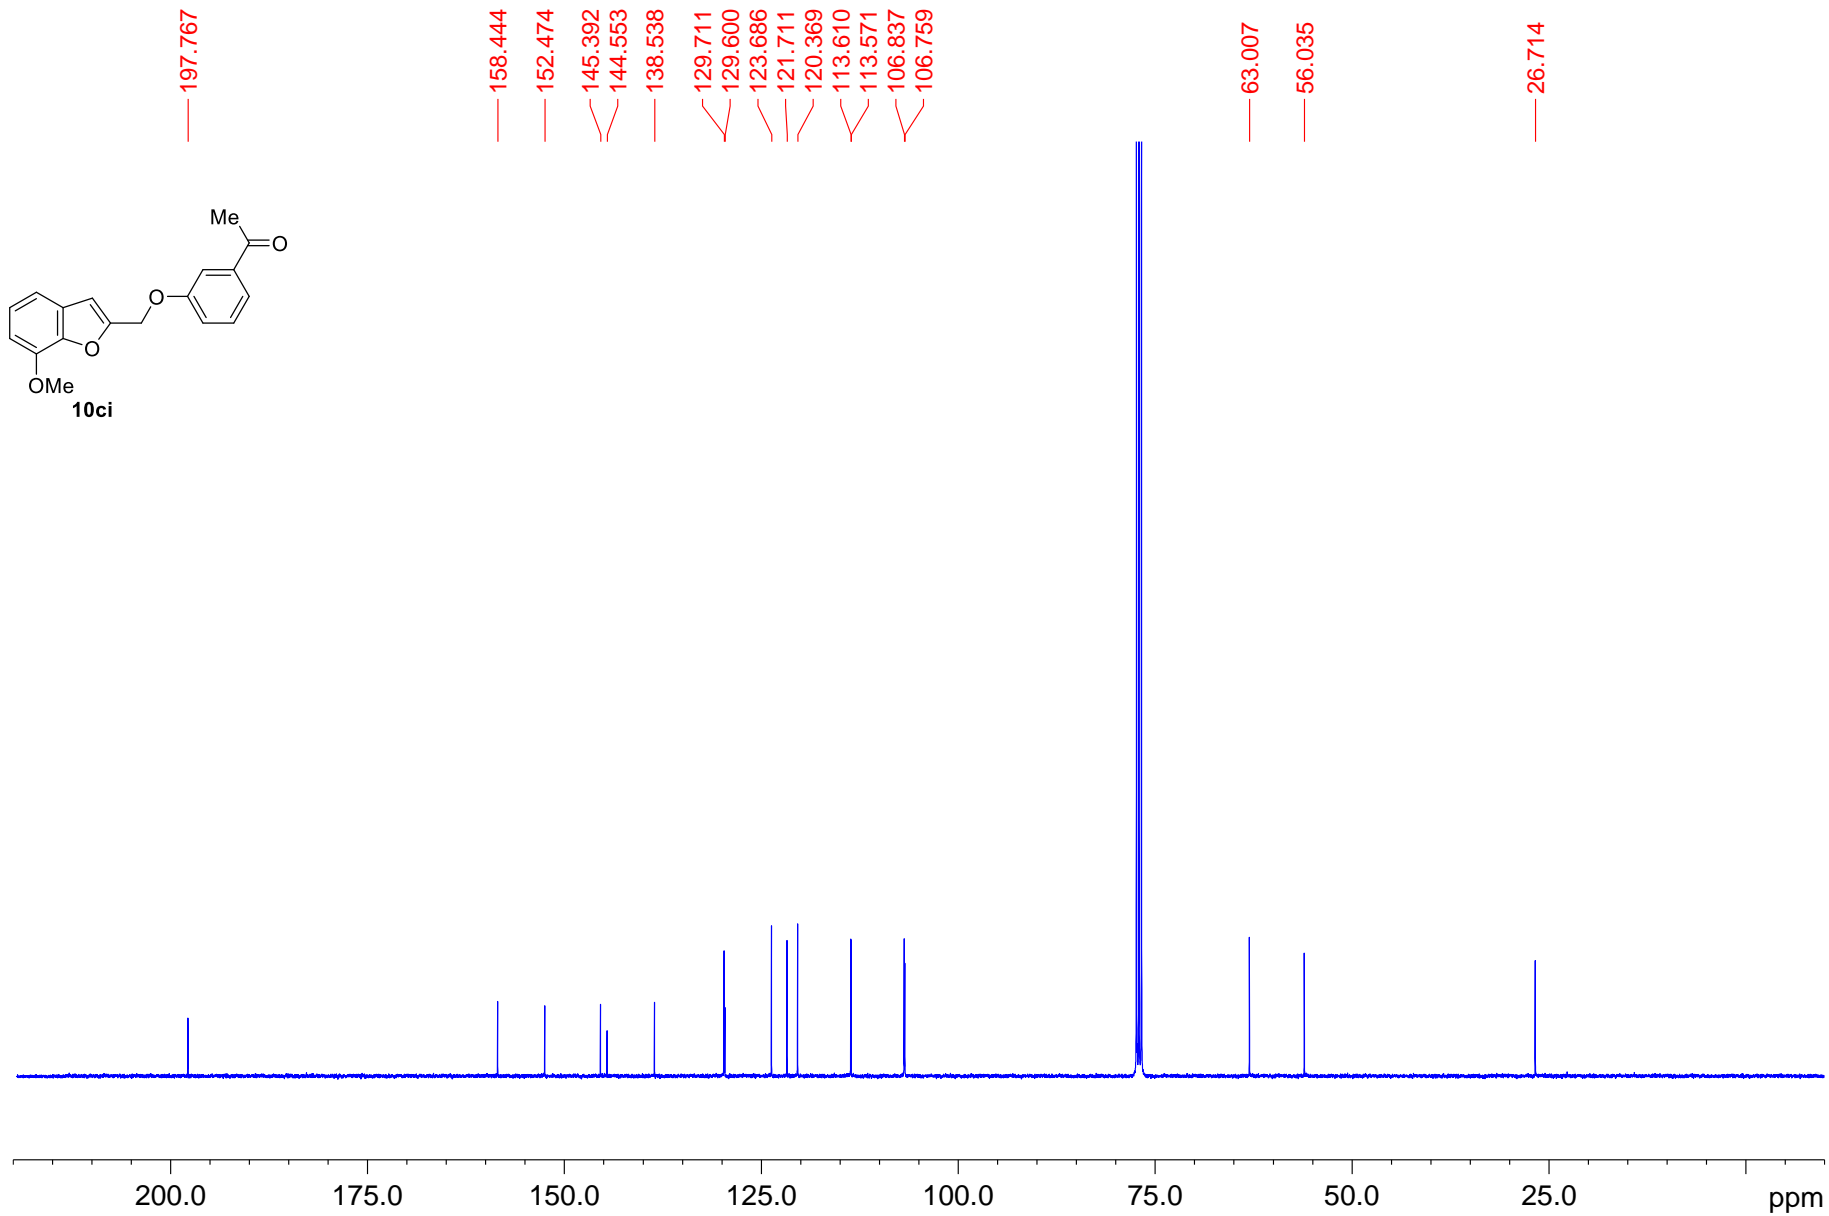

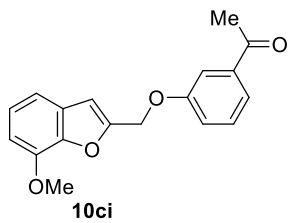

129.714  
123.688  
121.714  
120.372  
113.604  
113.572  
106.843  
106.752

63.003  
56.034

26.721

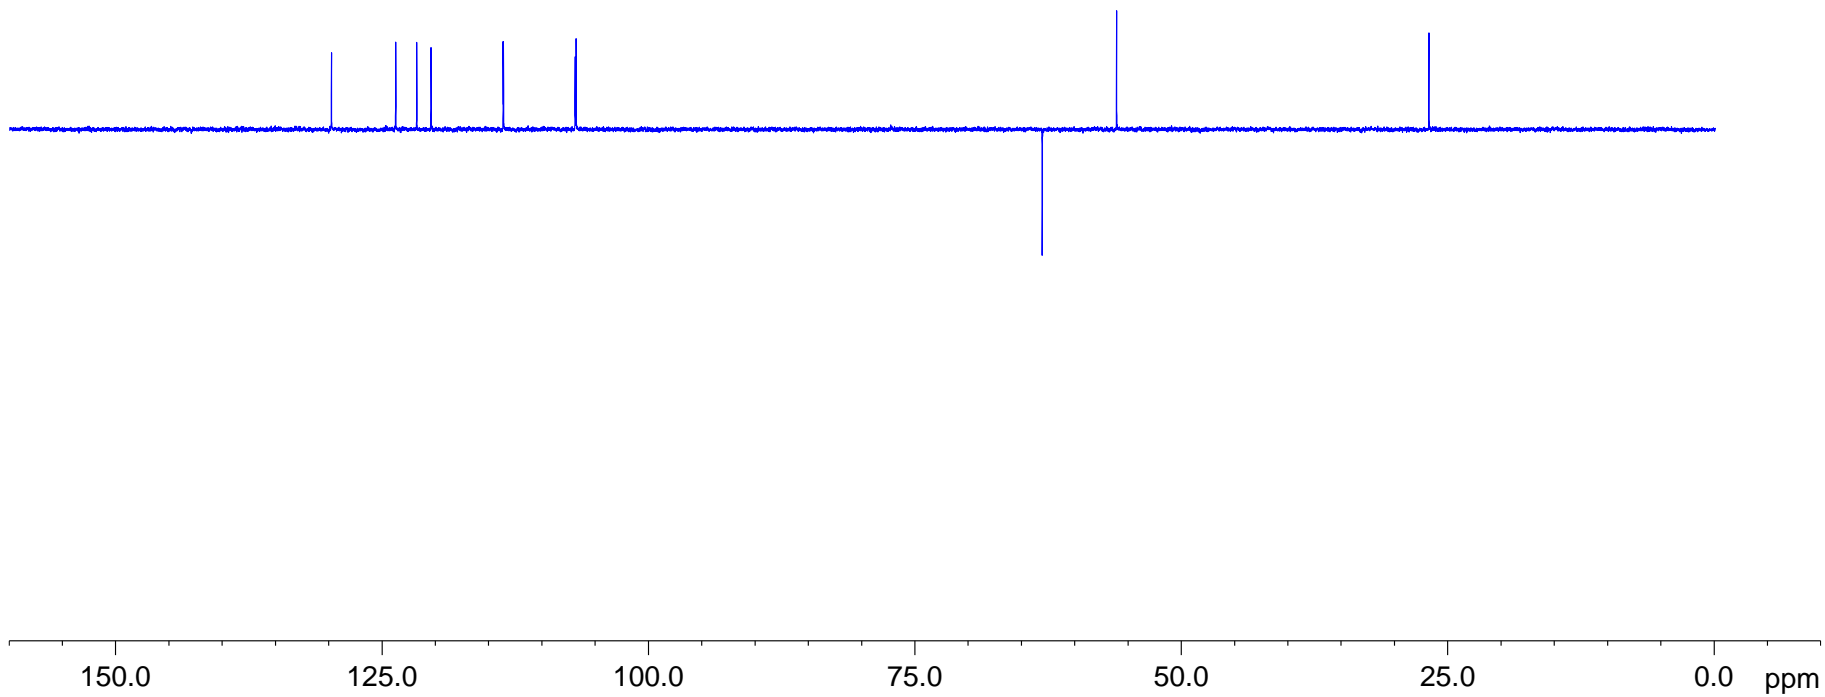

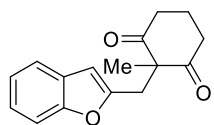

13aa

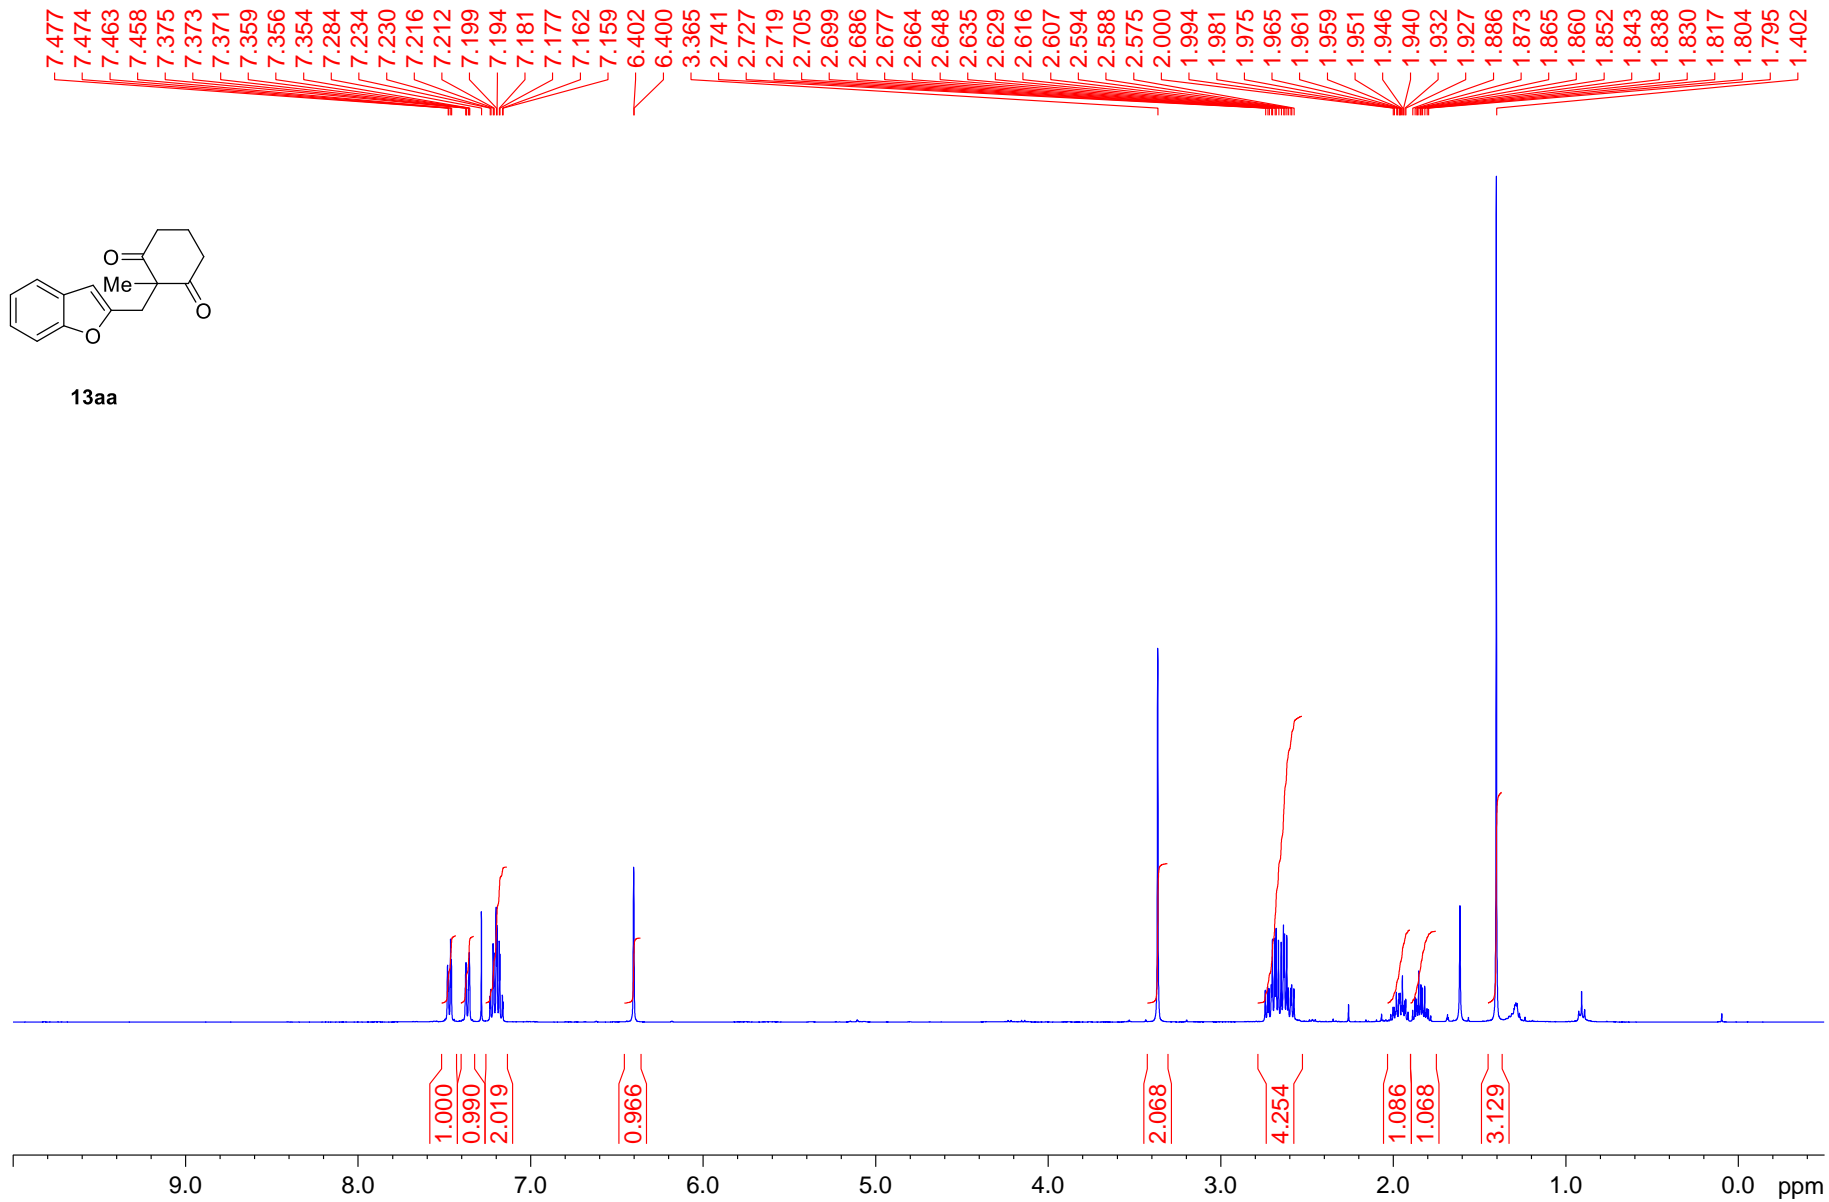

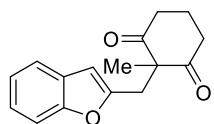

13aa

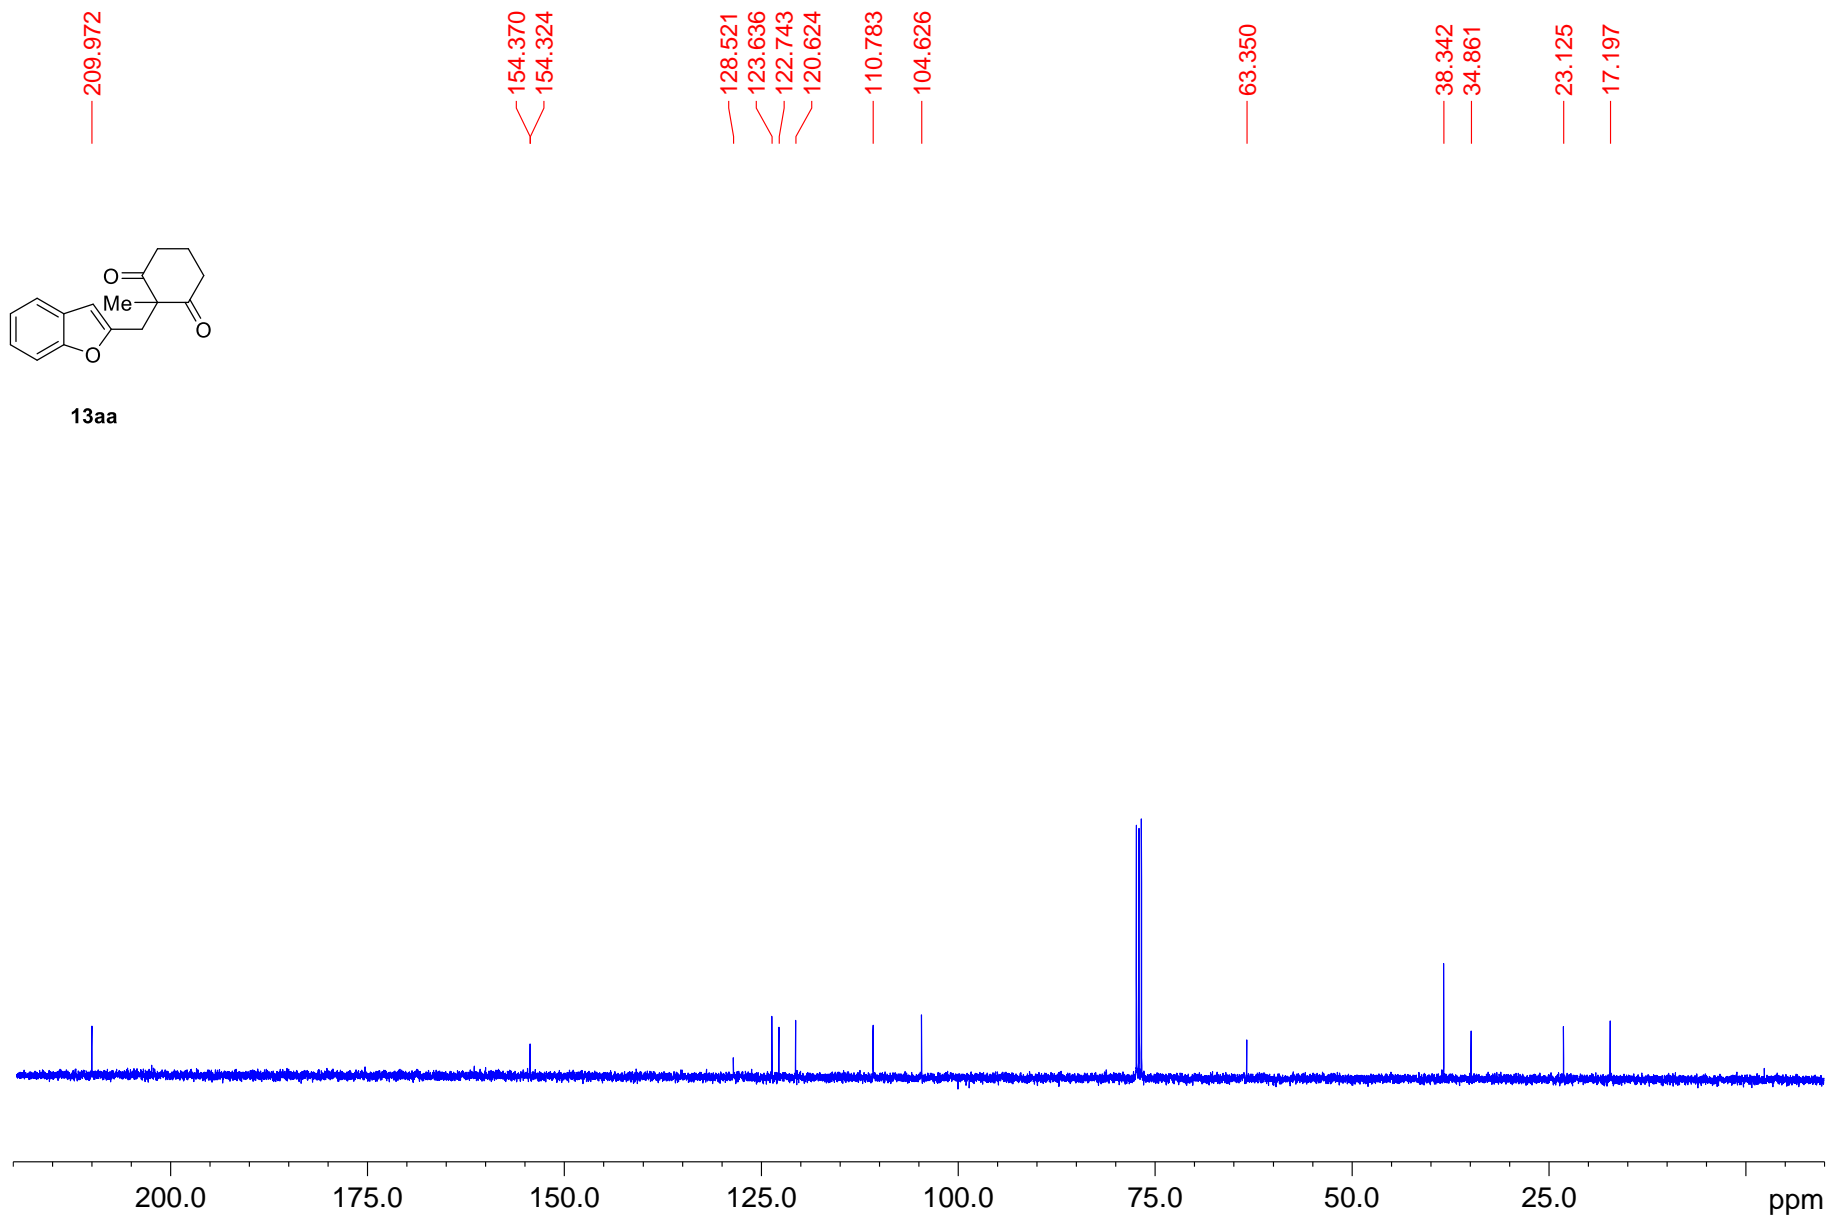



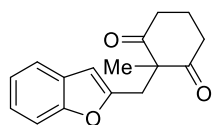

13aa

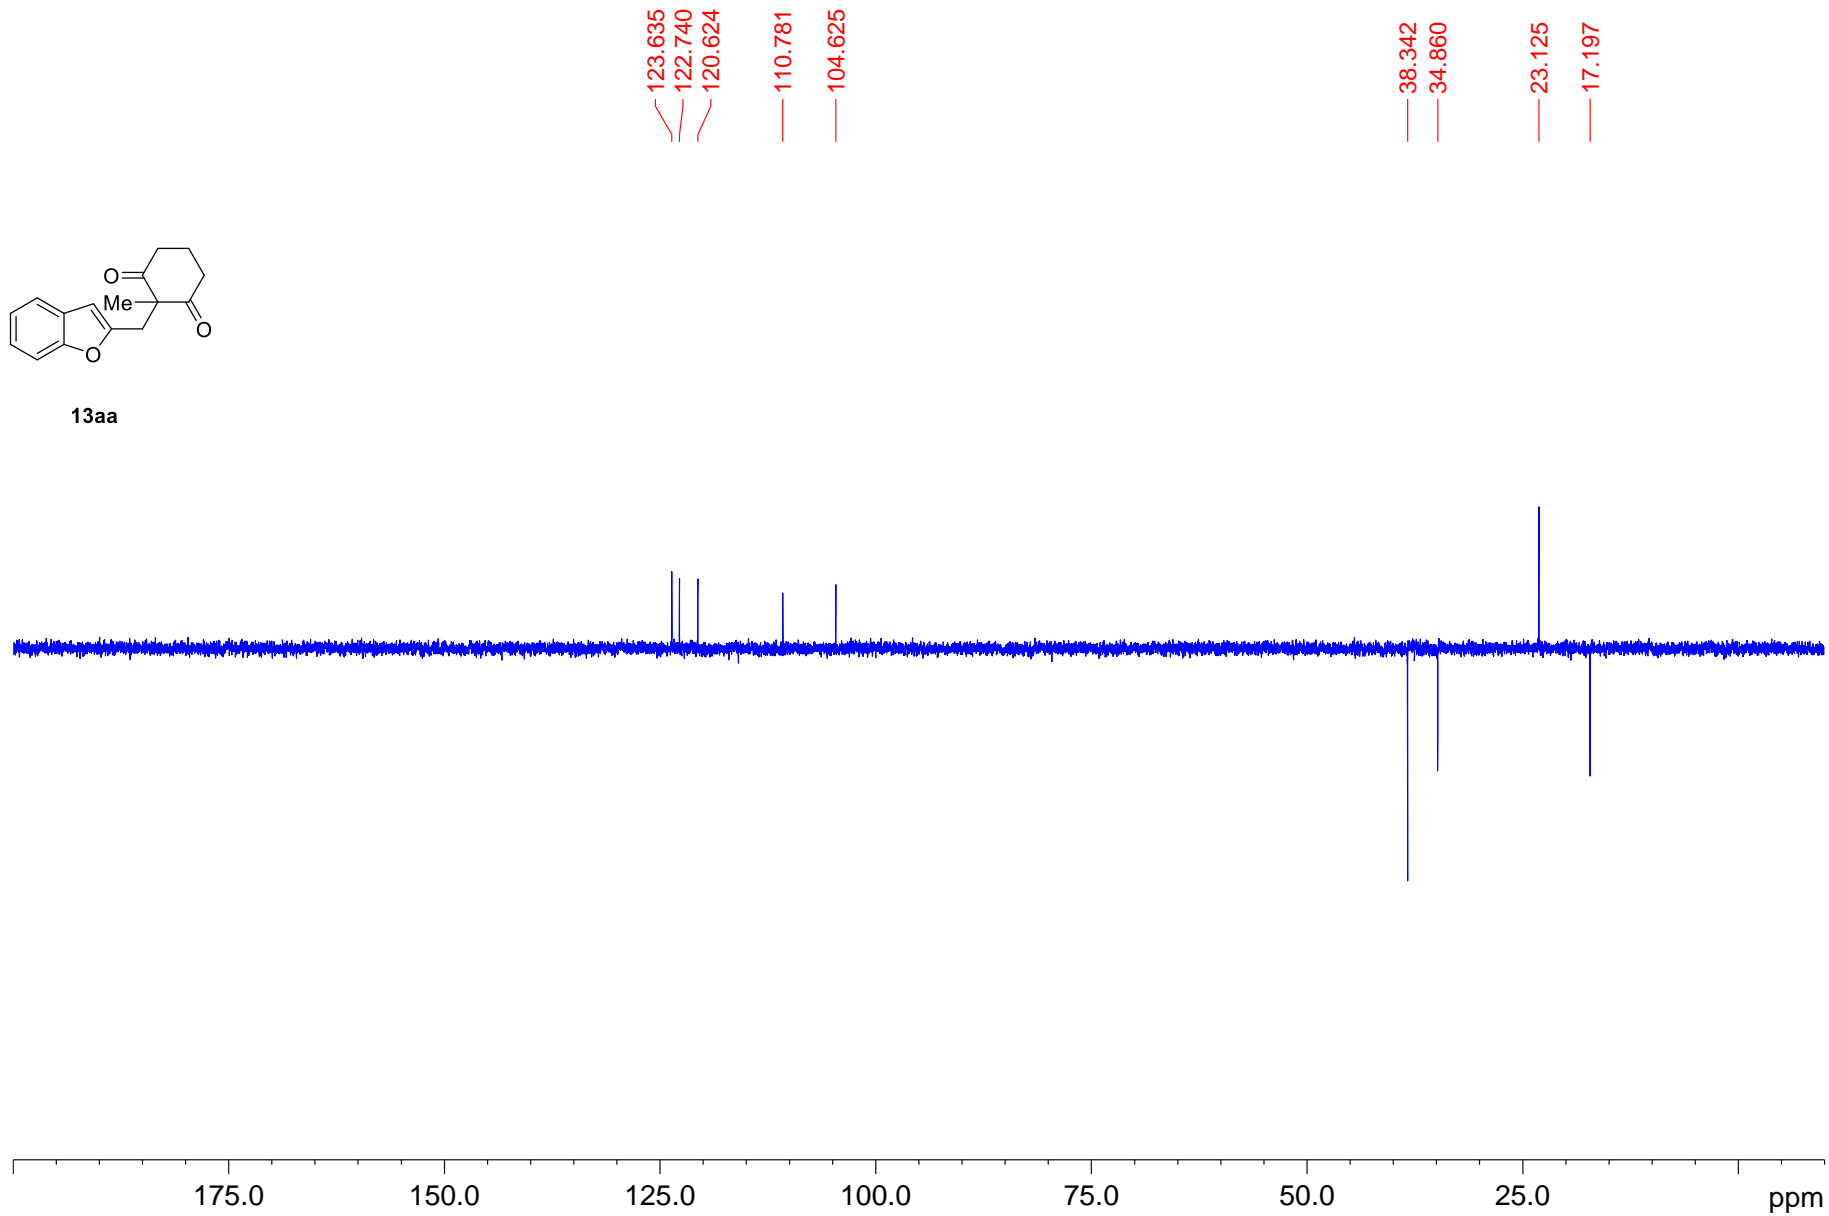

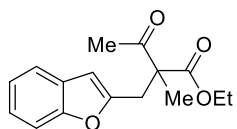

13ab

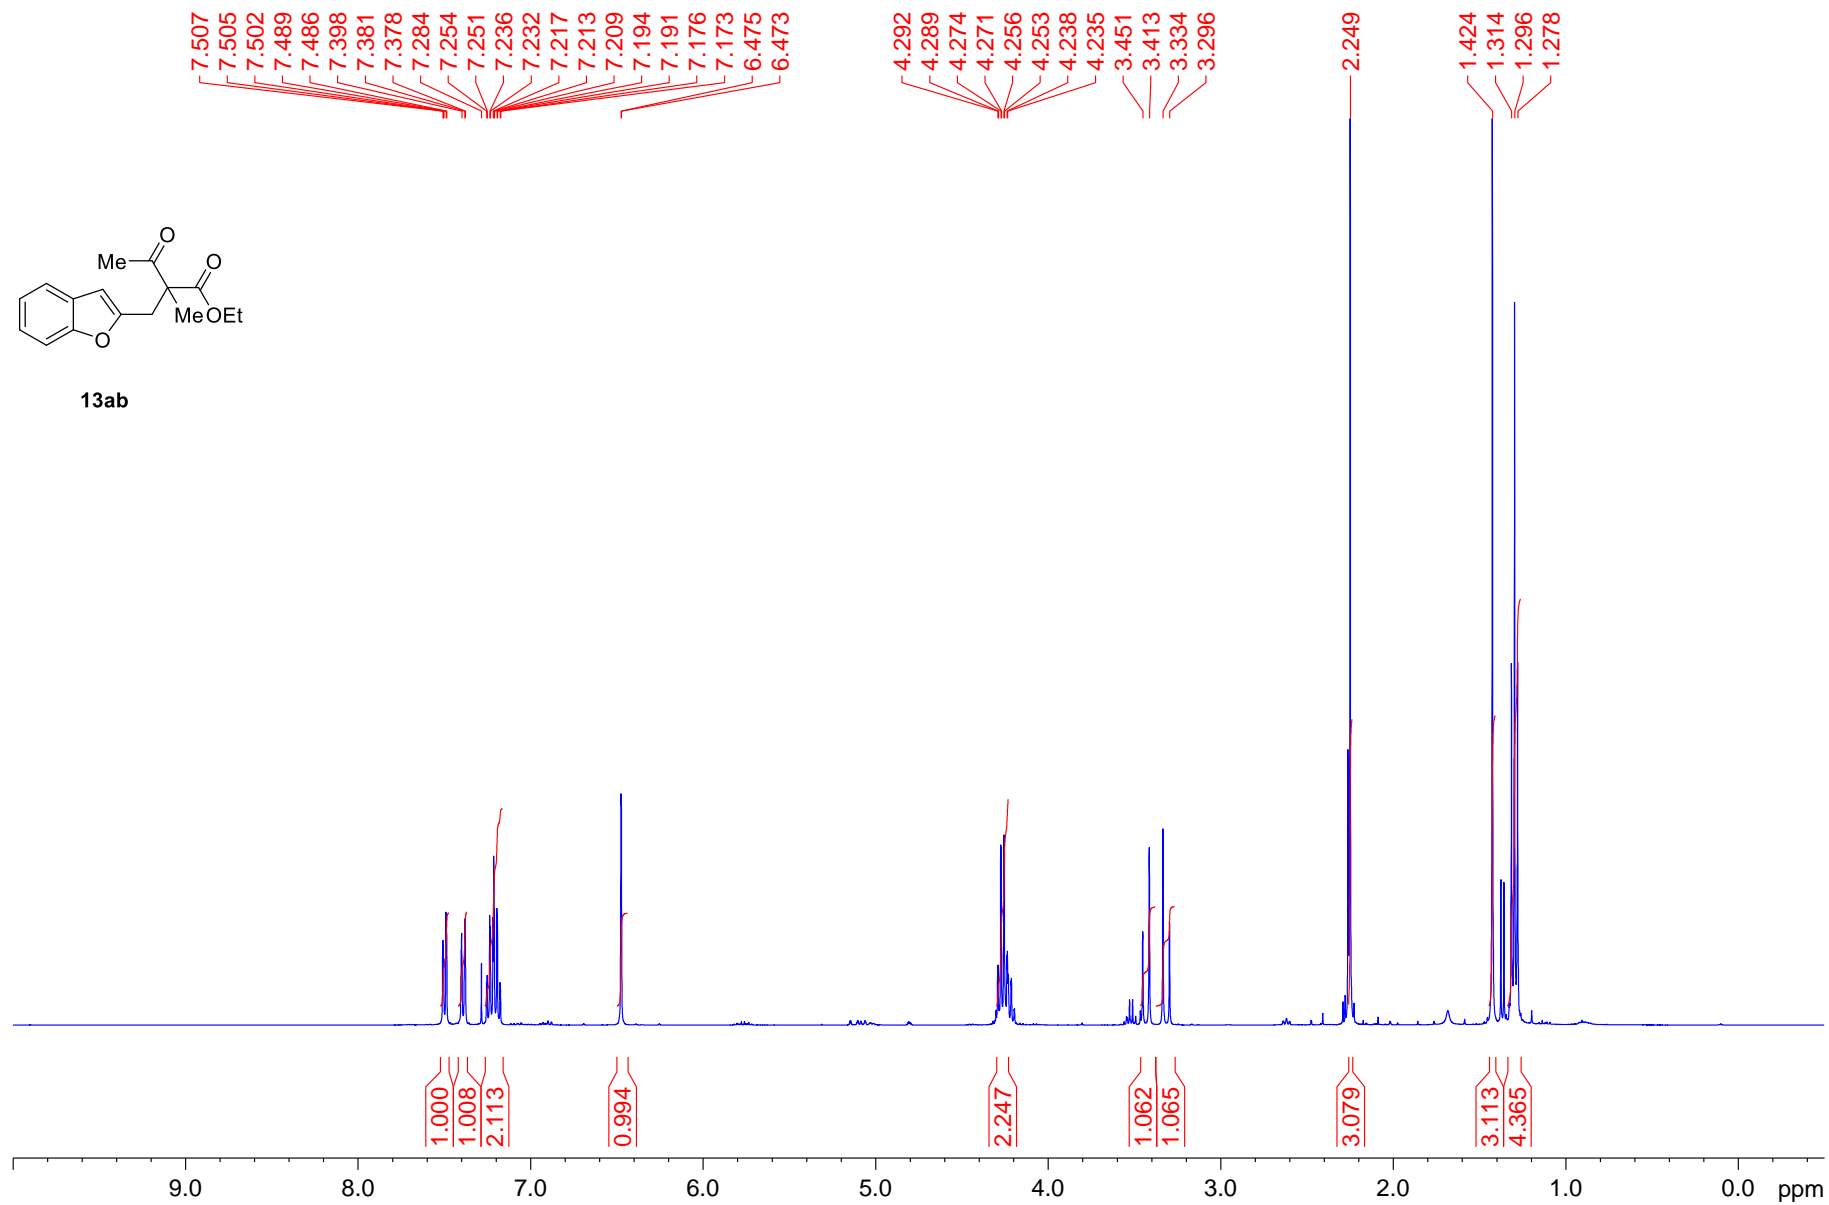

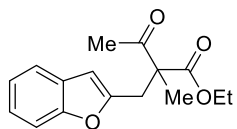

13ab

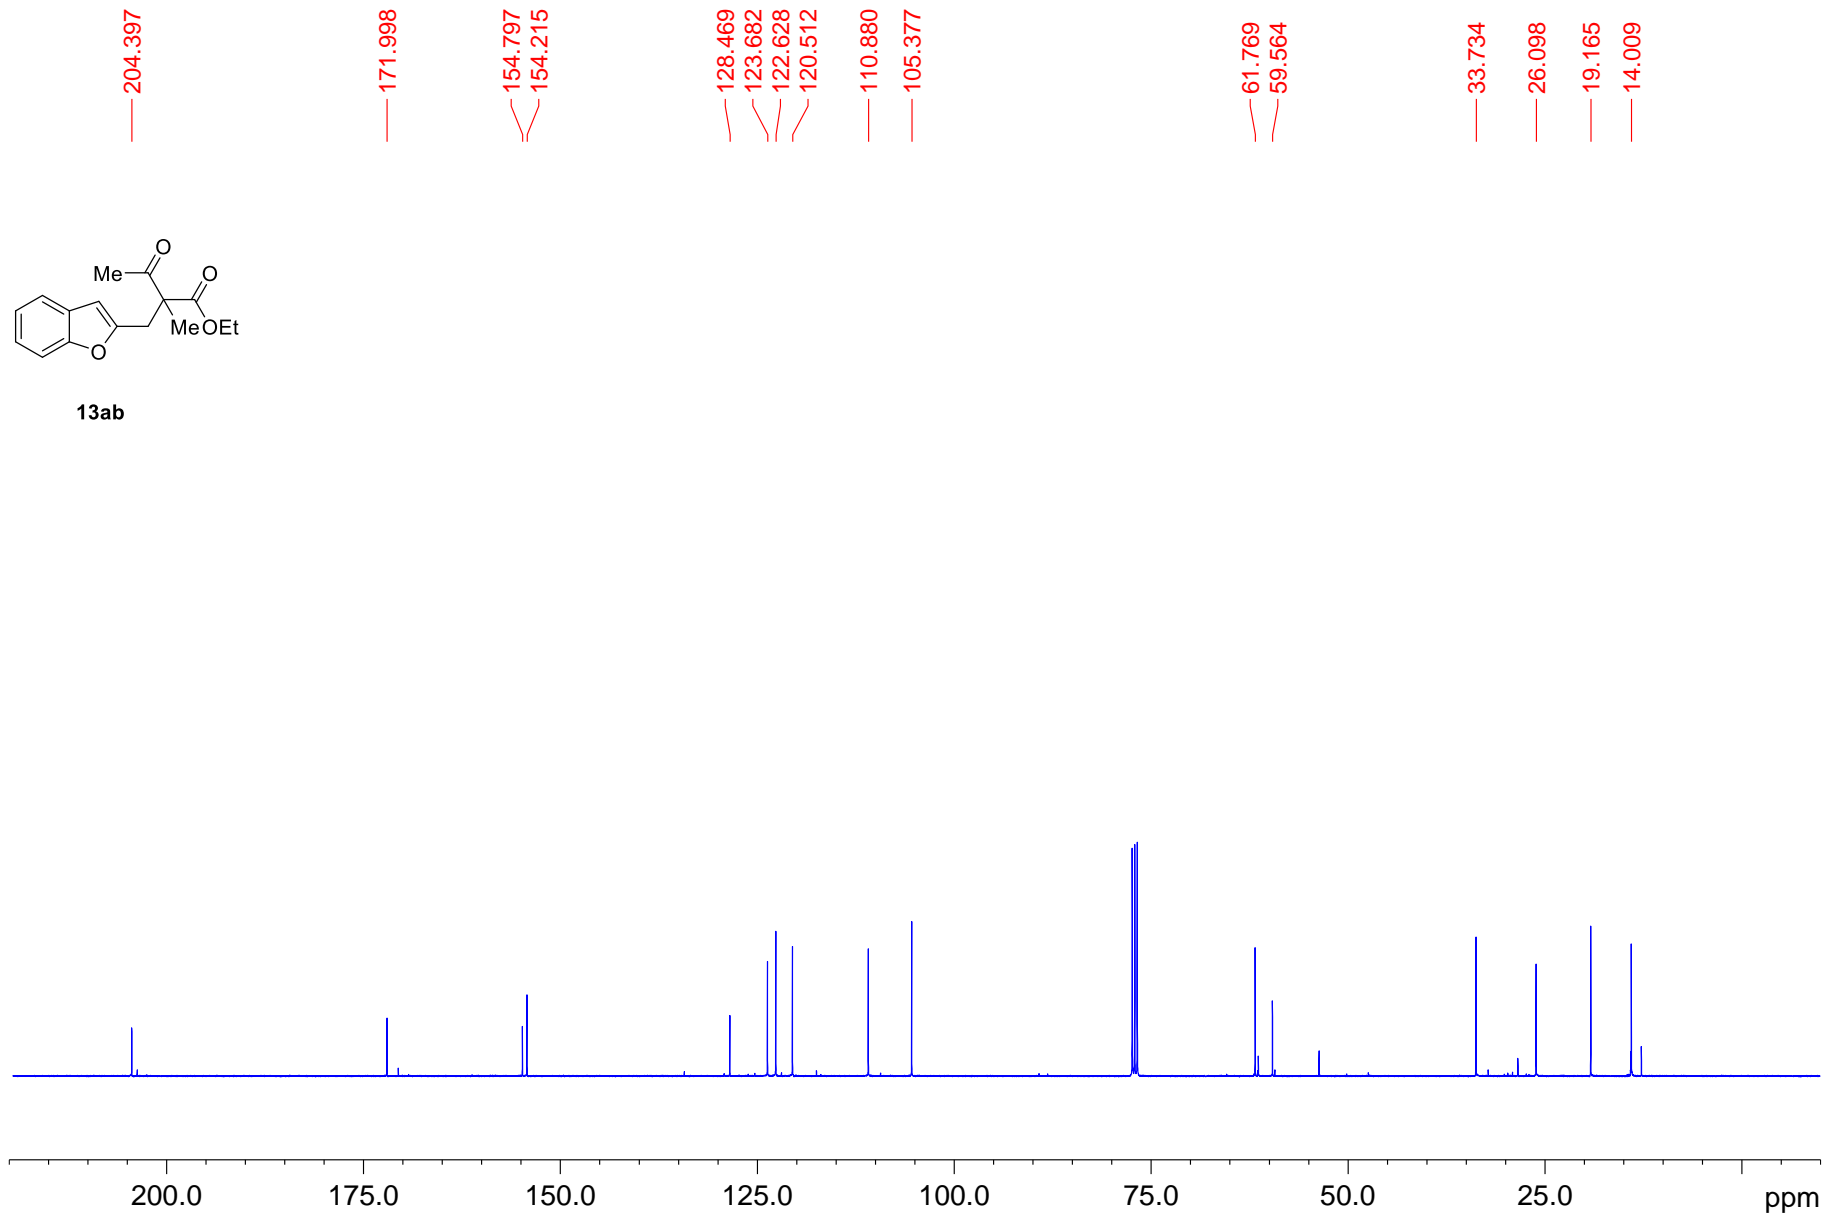

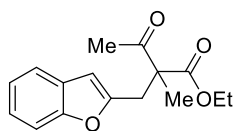

13ab

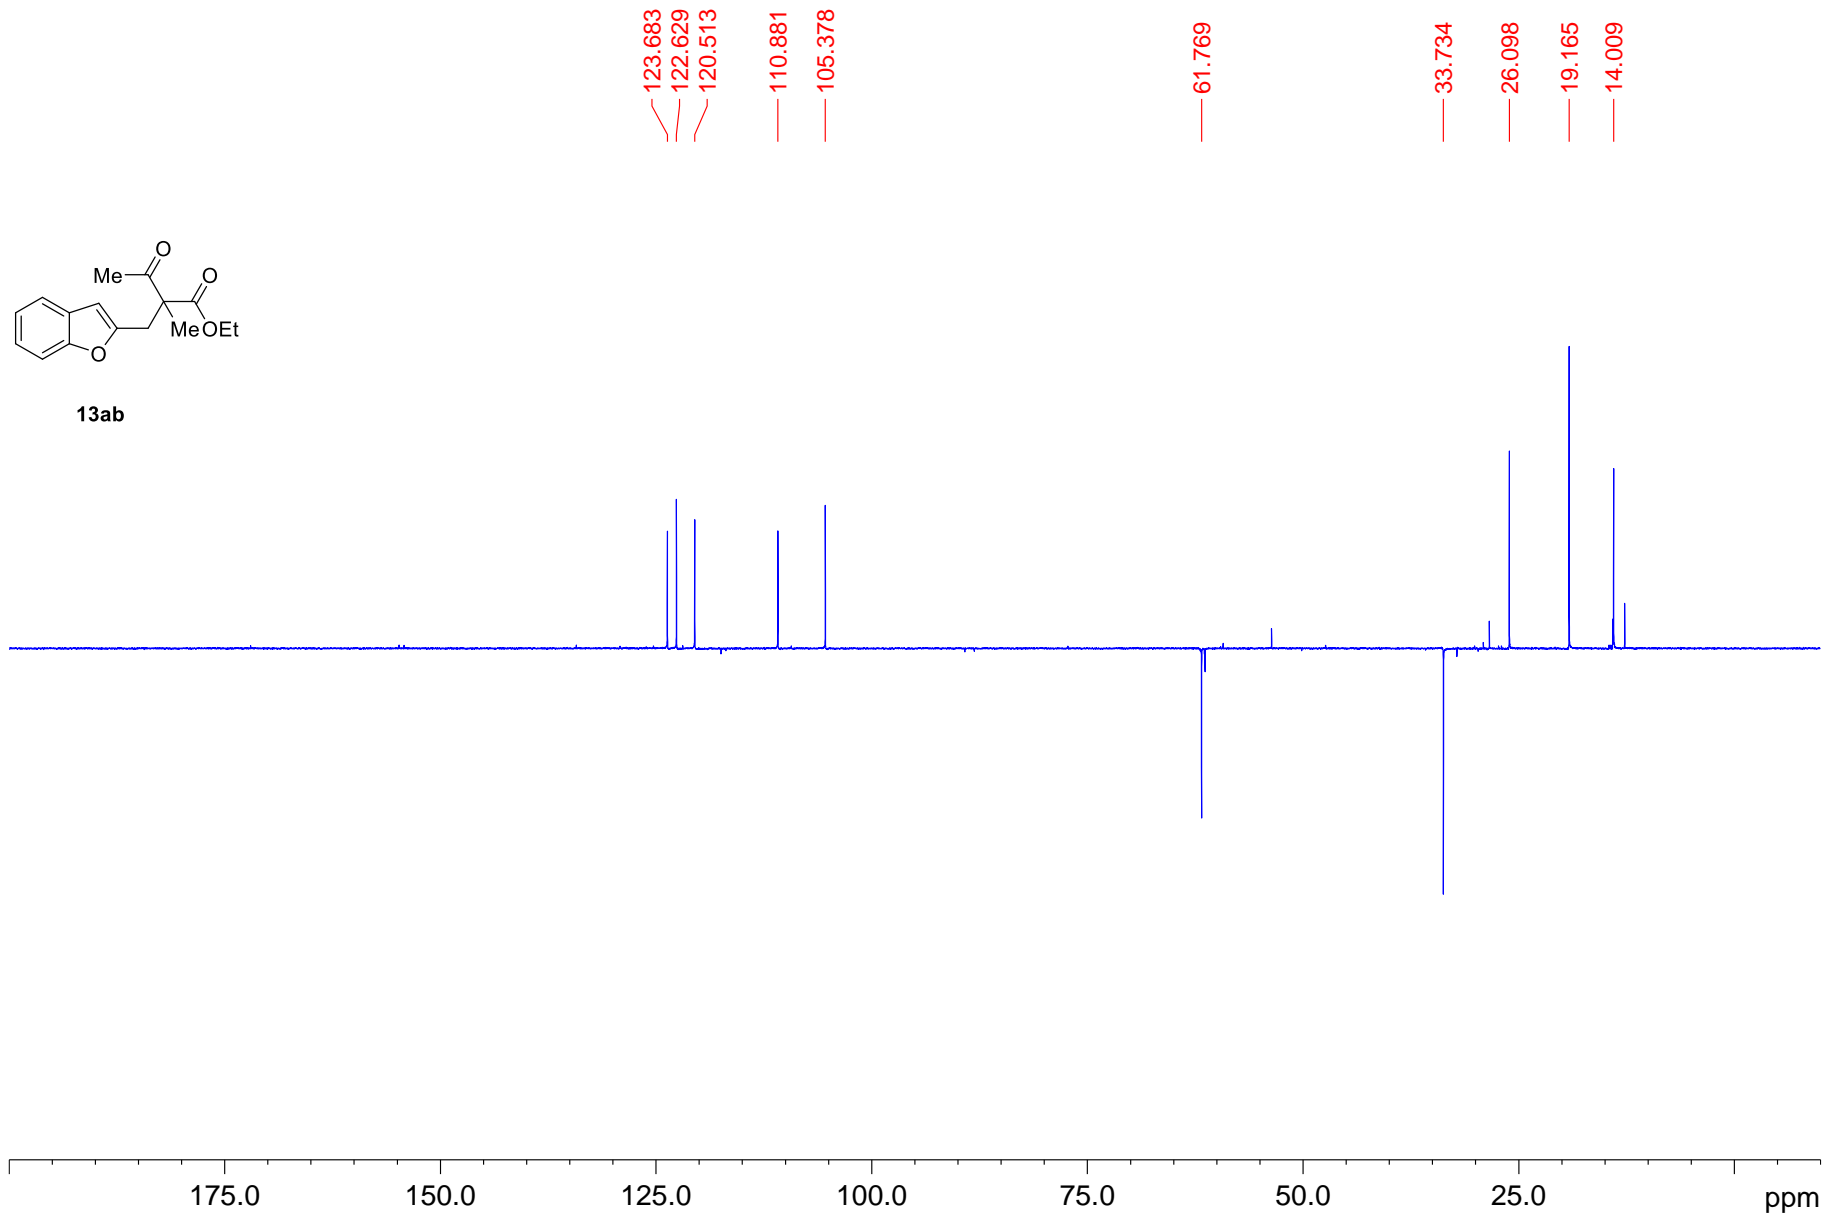

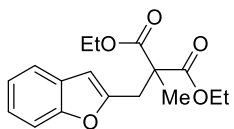

13ac

7.515  
7.513  
7.510  
7.497  
7.493  
7.405  
7.385  
7.284  
7.259  
7.256  
7.241  
7.237  
7.222  
7.217  
7.213  
7.198  
7.195  
7.180  
7.177  
6.492

4.296  
4.287  
4.282  
4.278  
4.269  
4.264  
4.251  
4.247  
4.237  
4.233  
4.229  
4.220  
3.432

1.483  
1.310  
1.293  
1.275

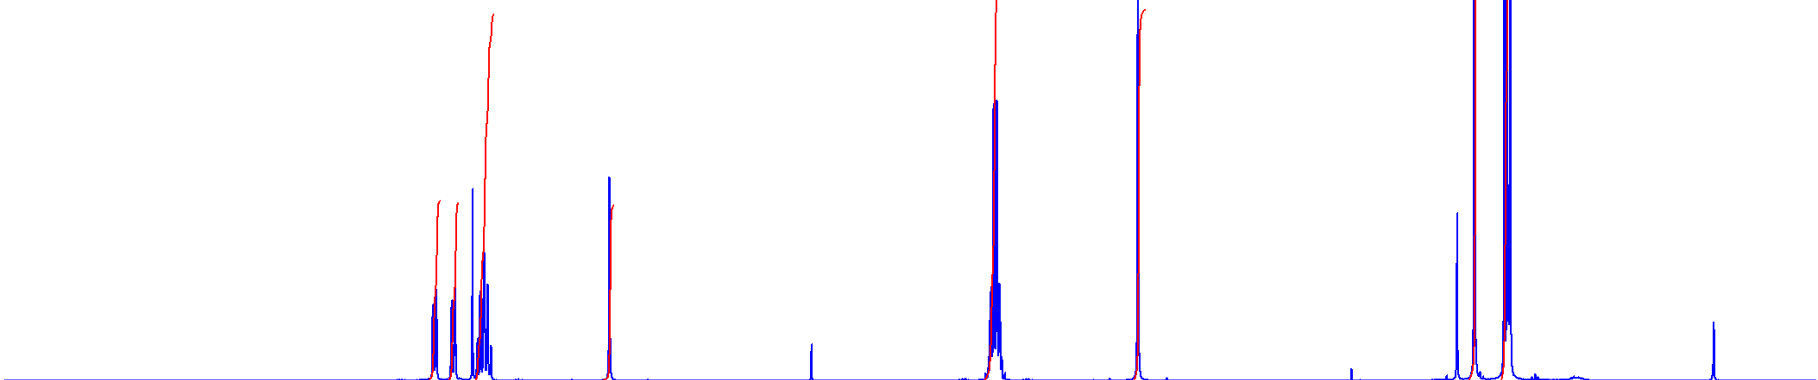

1.007  
0.995  
2.046

0.982

4.118

2.072

3.163  
6.456

9.0 8.0 7.0 6.0 5.0 4.0 3.0 2.0 1.0 0.0 ppm

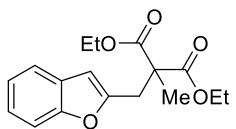

13ac

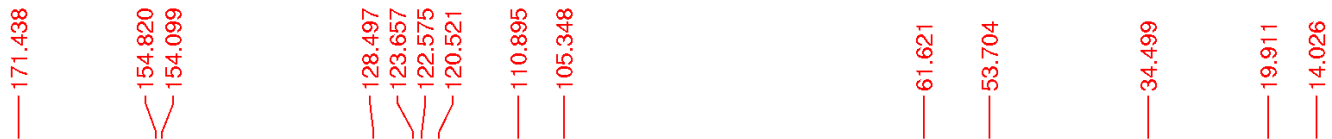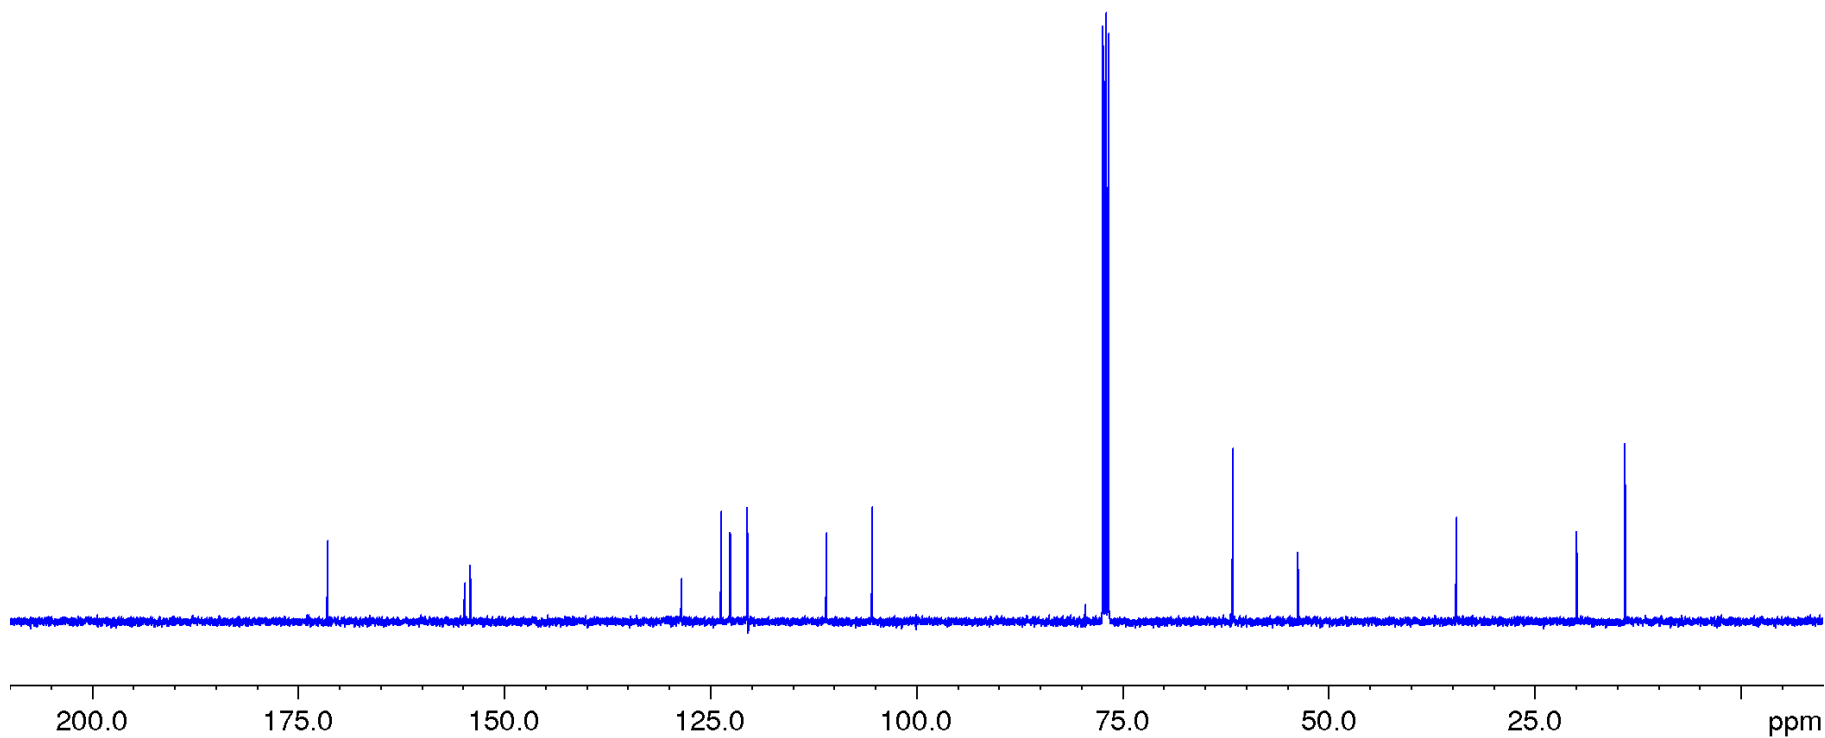

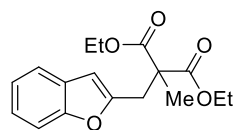

13ac

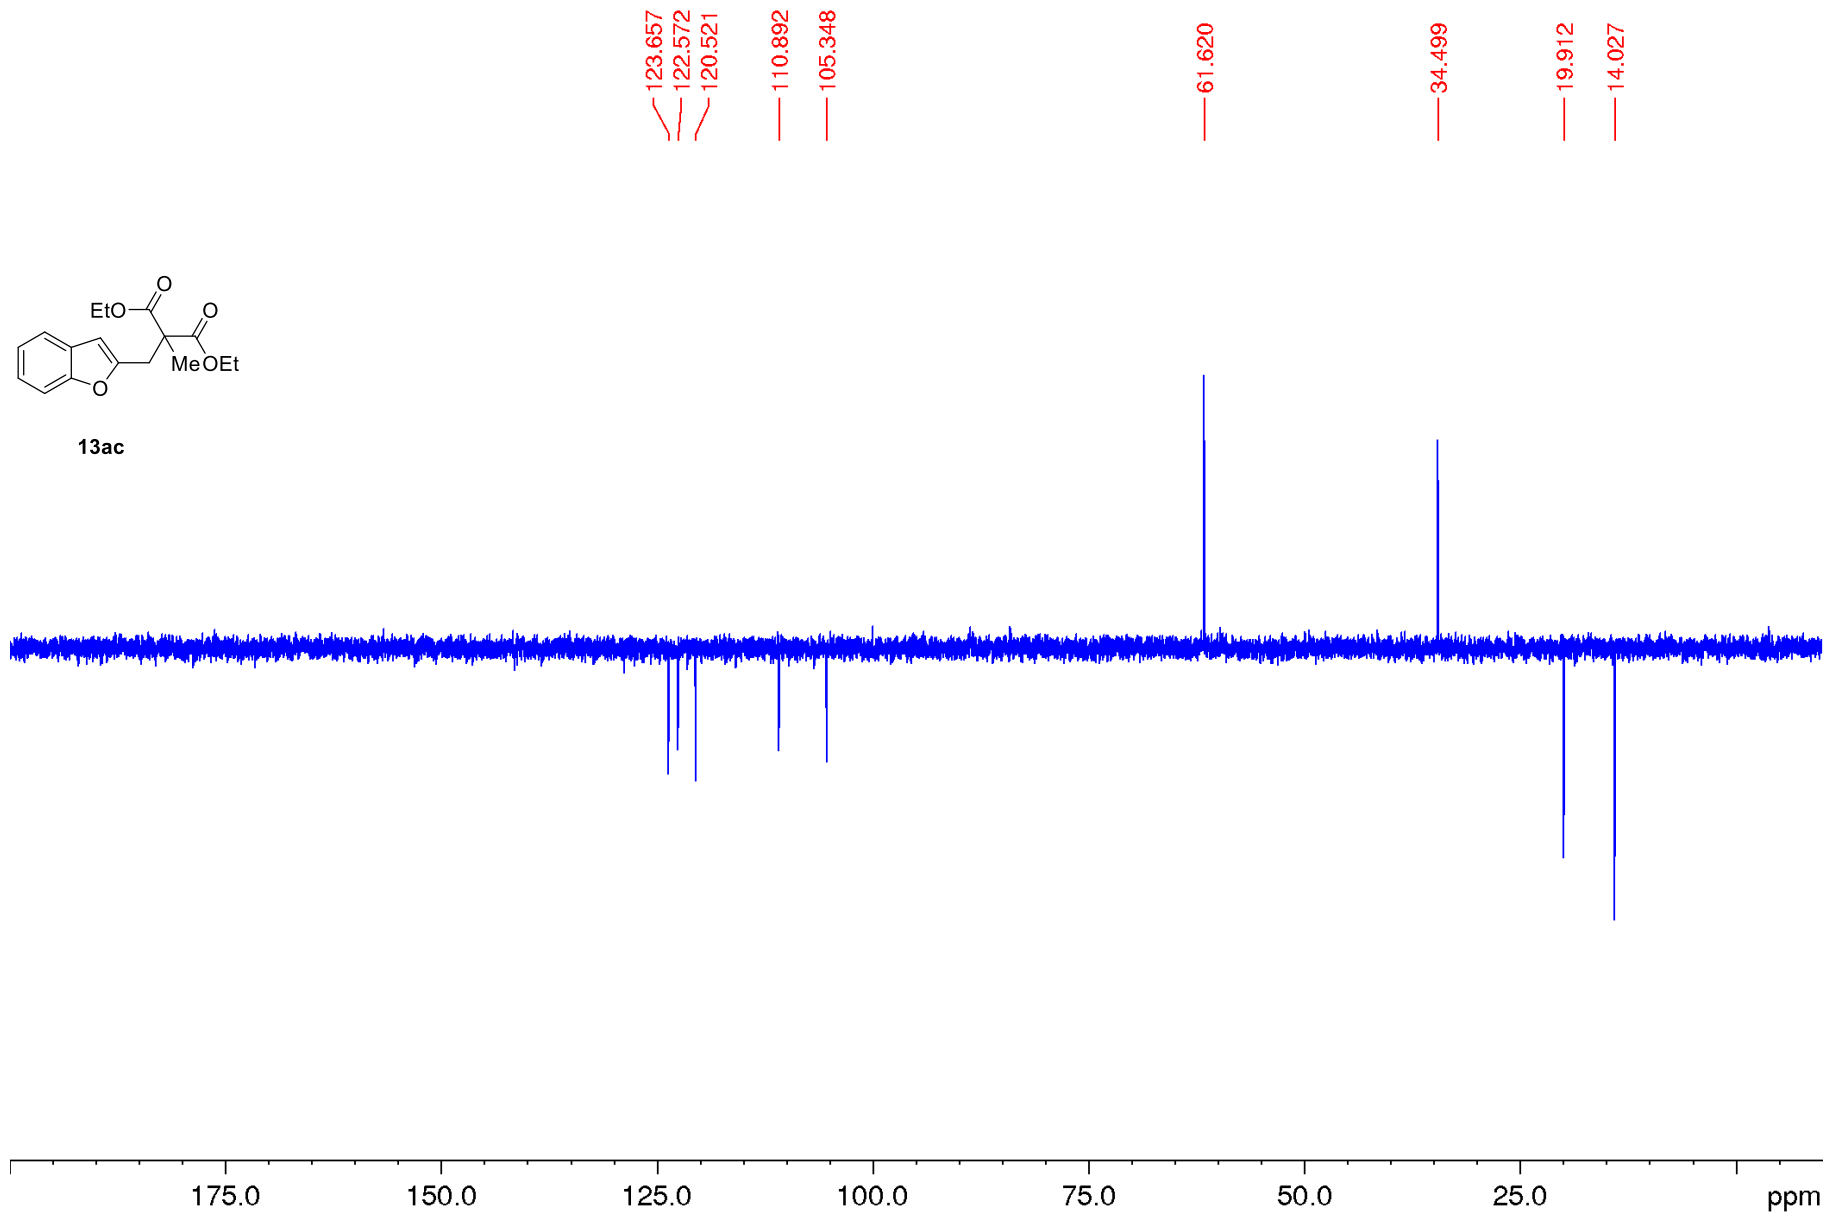

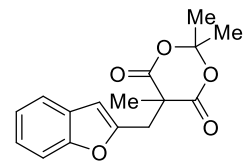

13ad

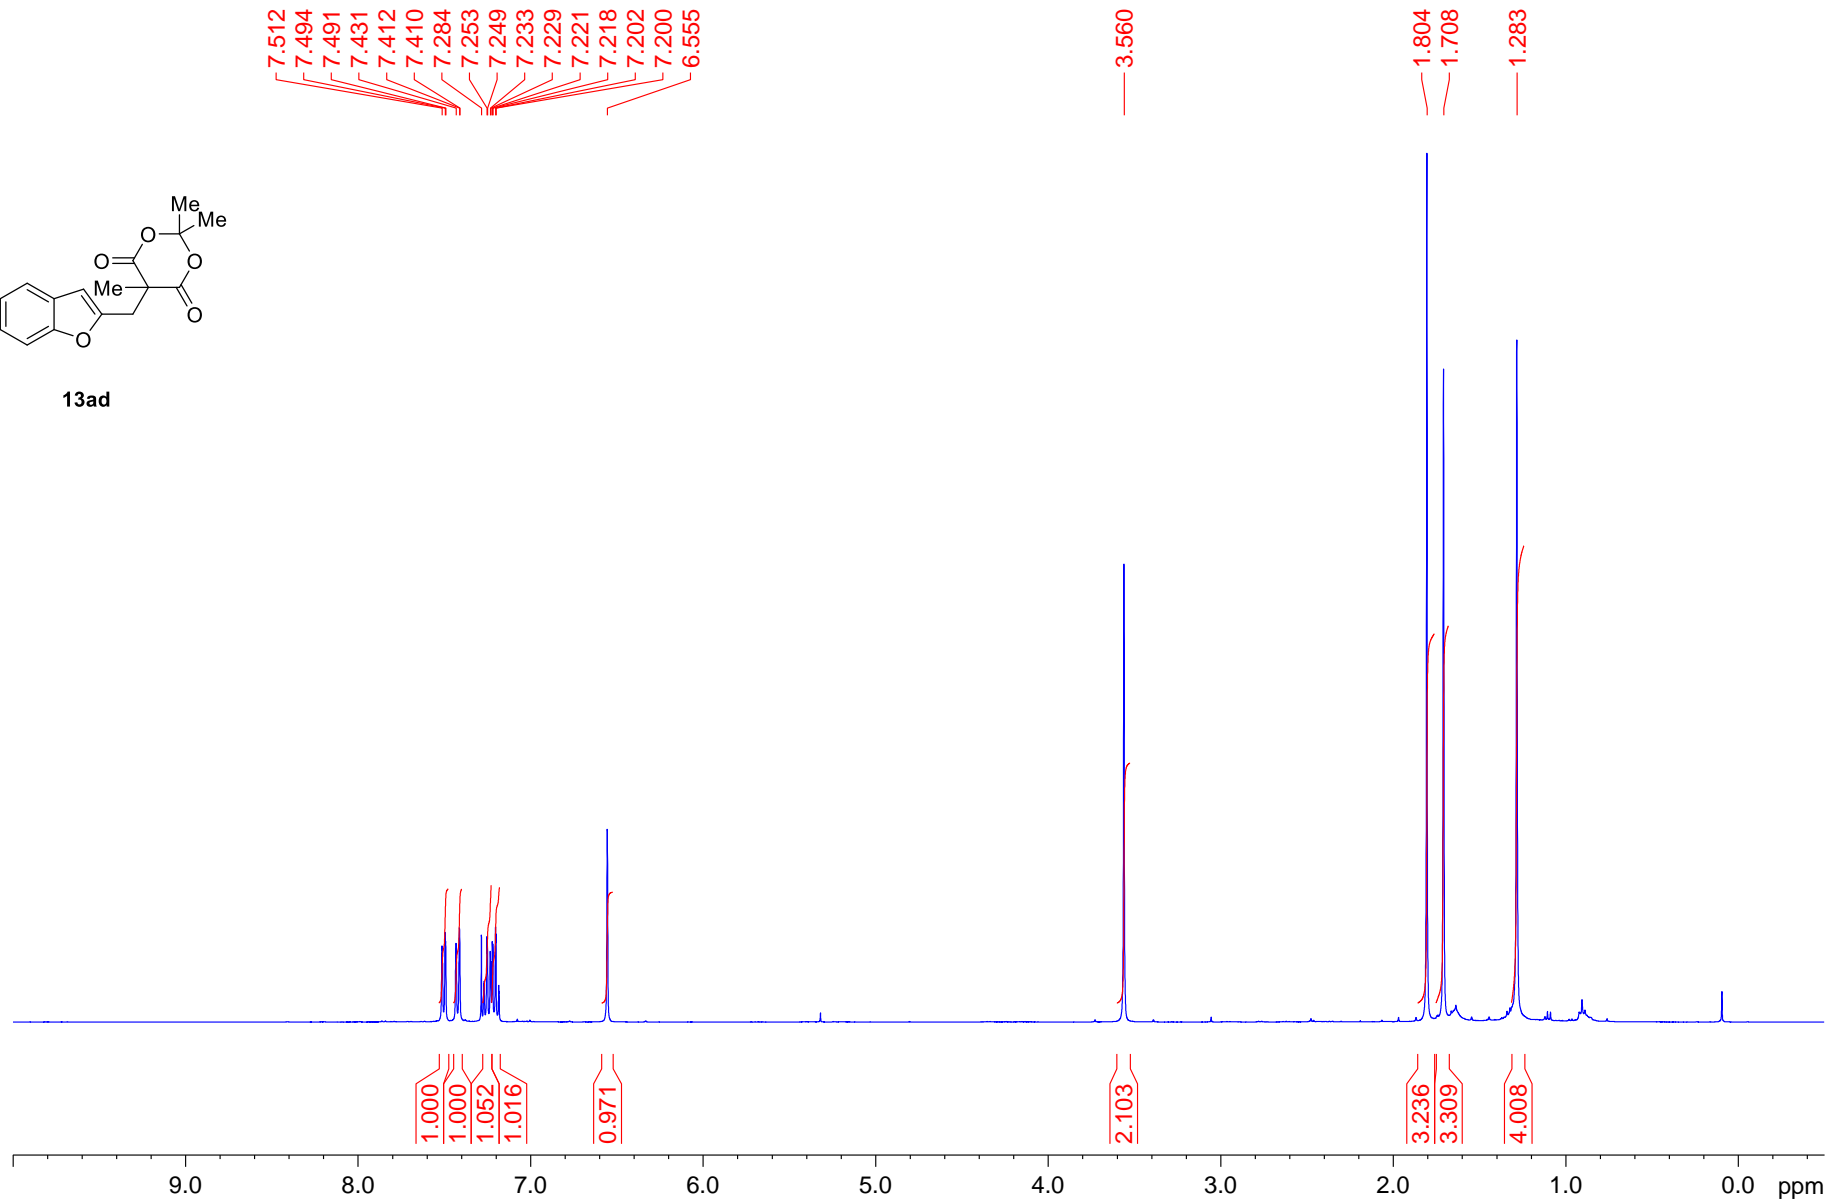



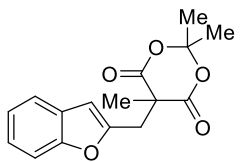

13ad

169.303

154.734  
152.225

128.082  
124.320  
122.943  
120.950

111.072  
106.049  
105.478

49.569

37.844

29.348  
28.447  
25.668

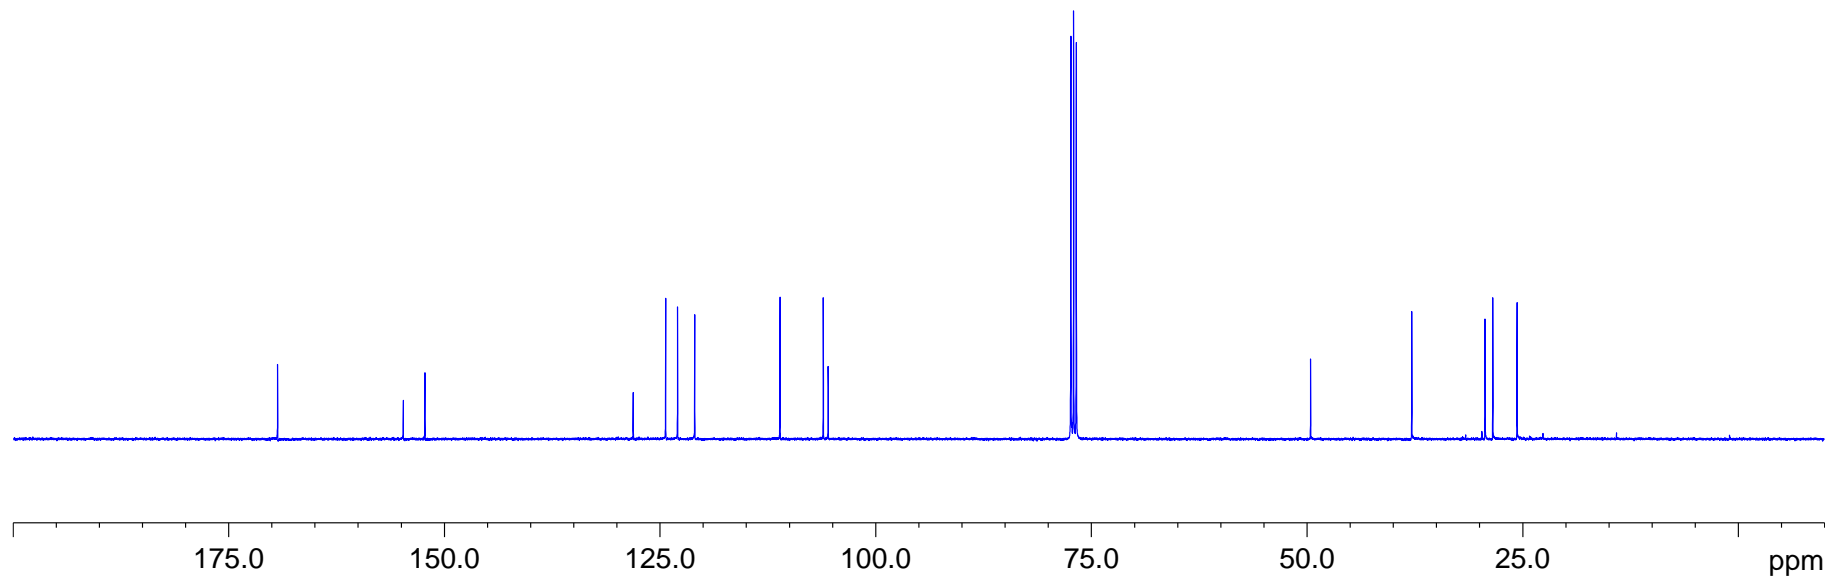



13ad

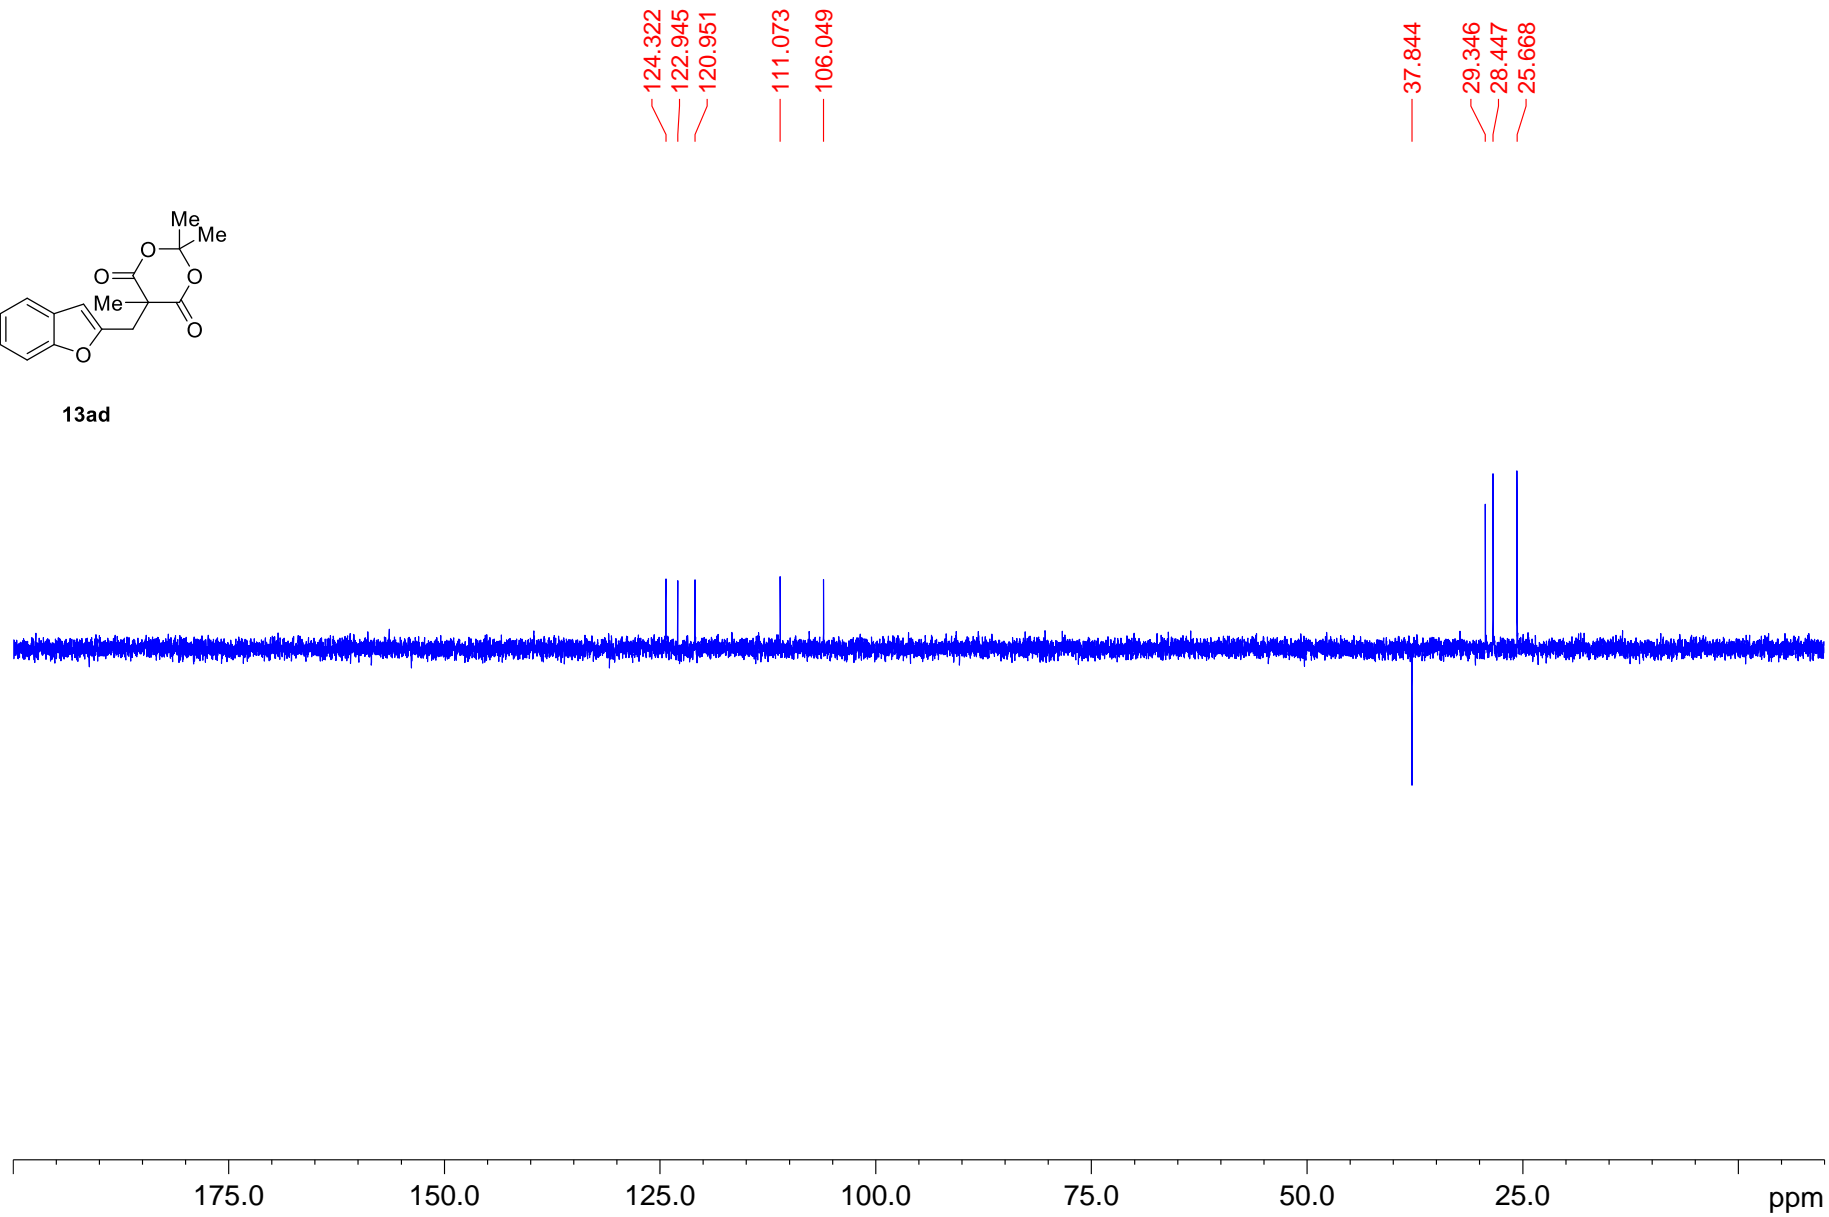

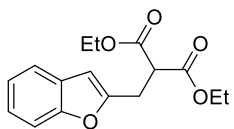

13ae

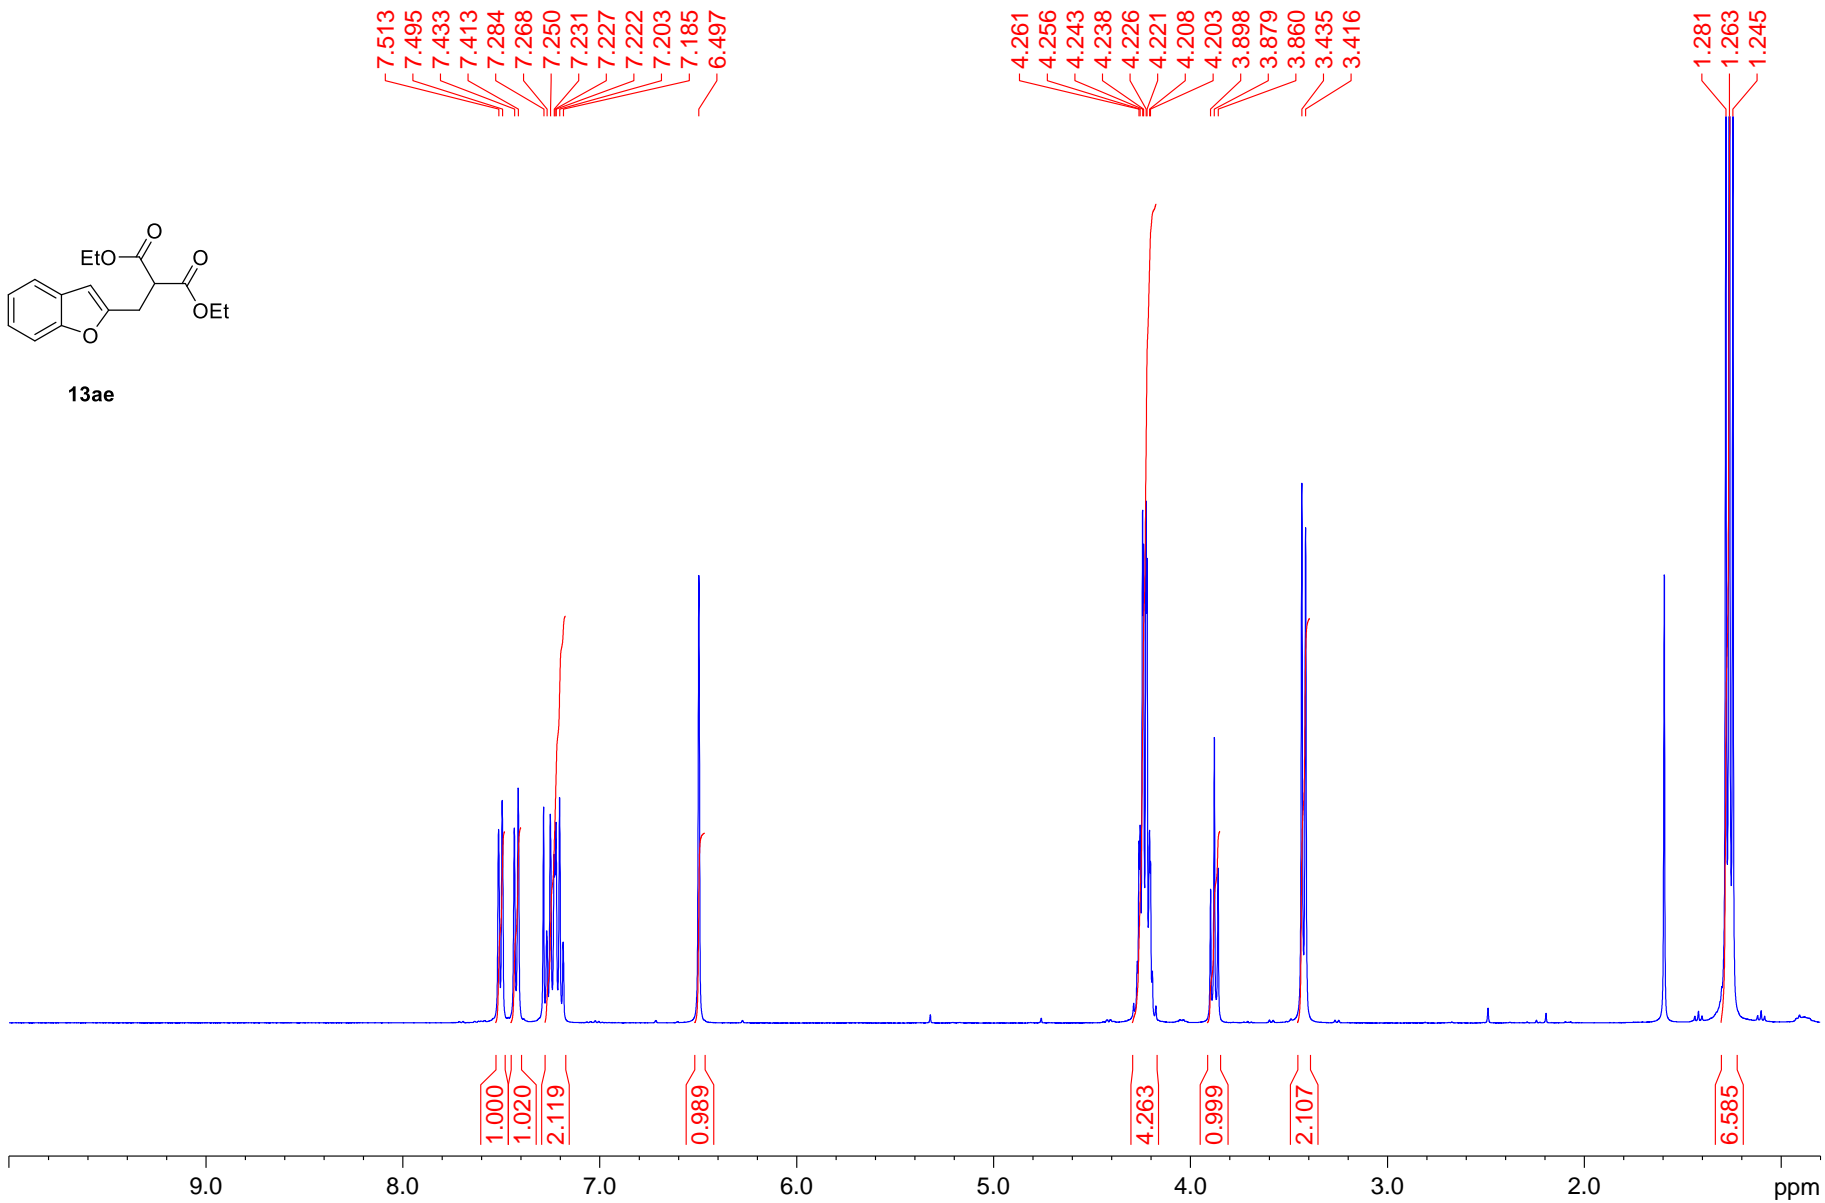



13ae

168.412  
161.419  
154.800

128.556  
123.698  
122.625  
120.586  
110.883  
103.796

61.765  
50.696

27.832  
14.017

1.031

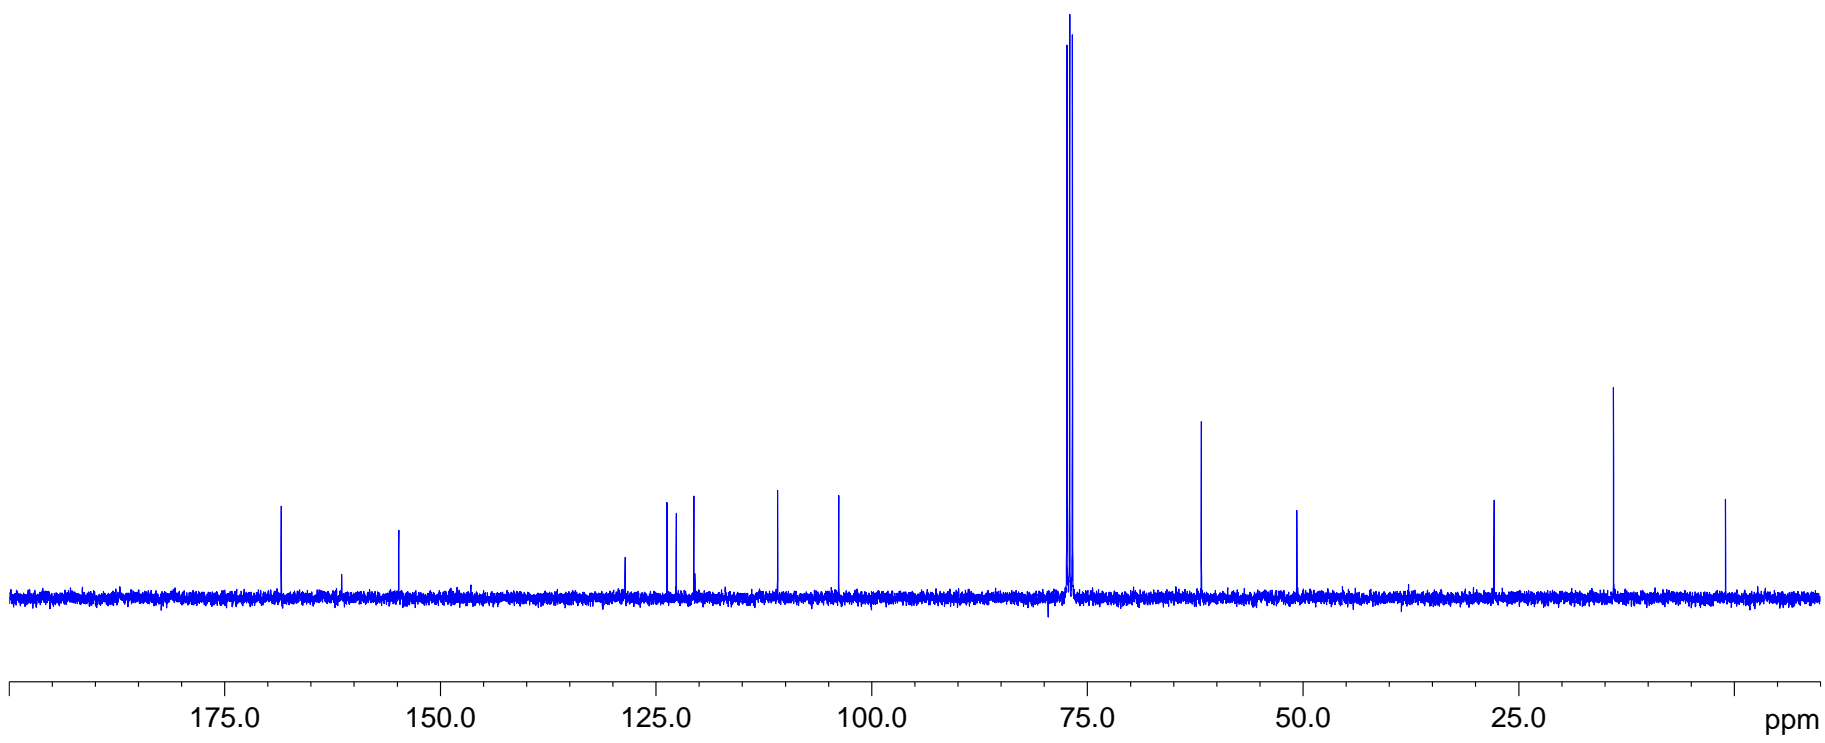



13ae

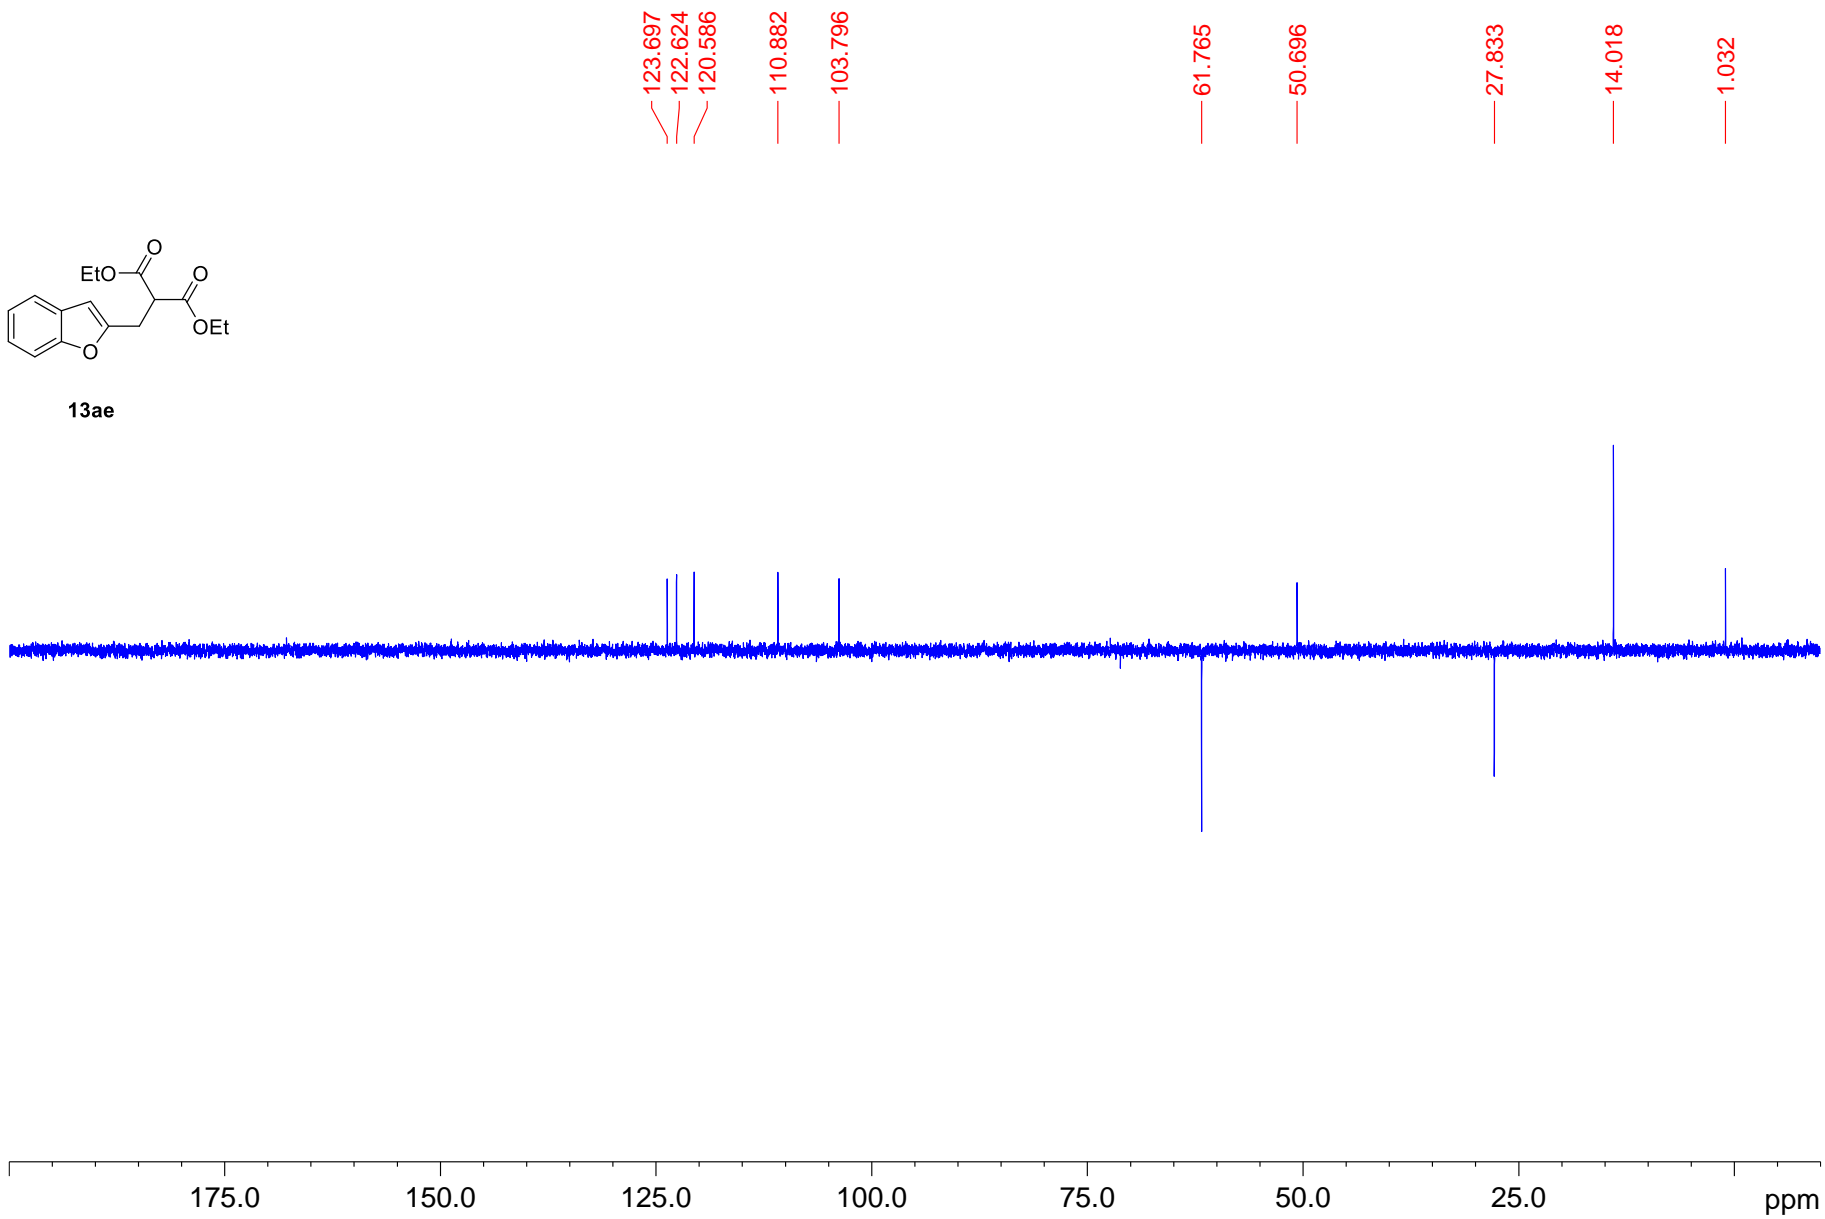

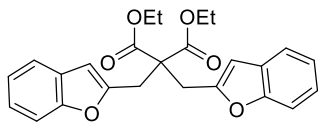

13'ae

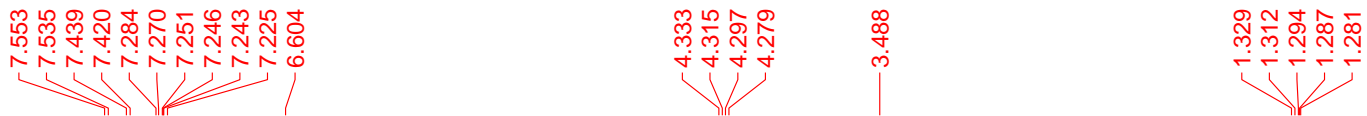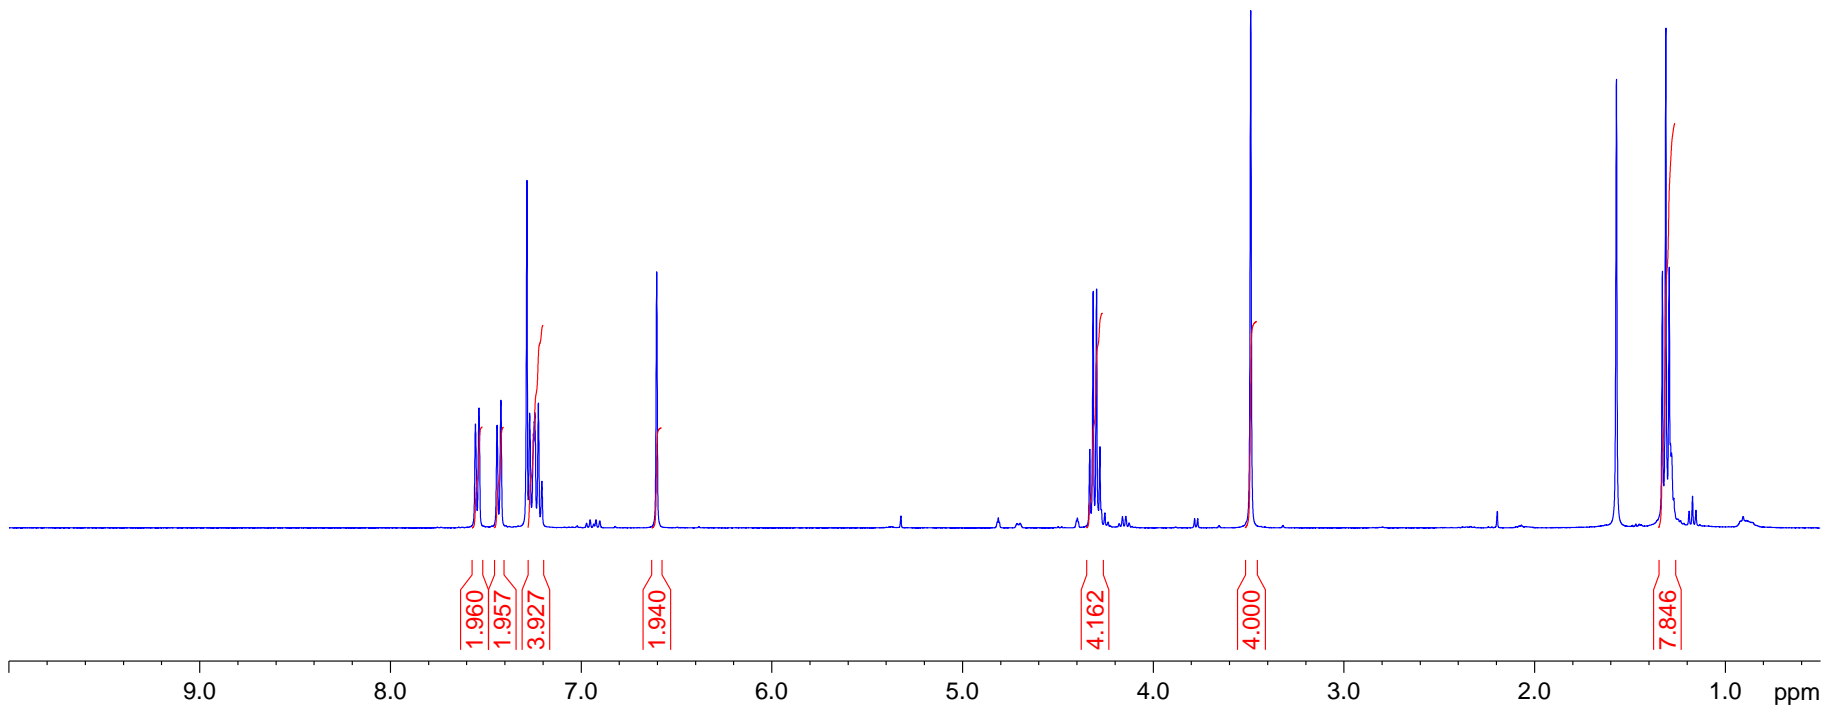

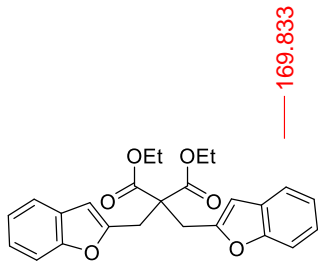

13'ae

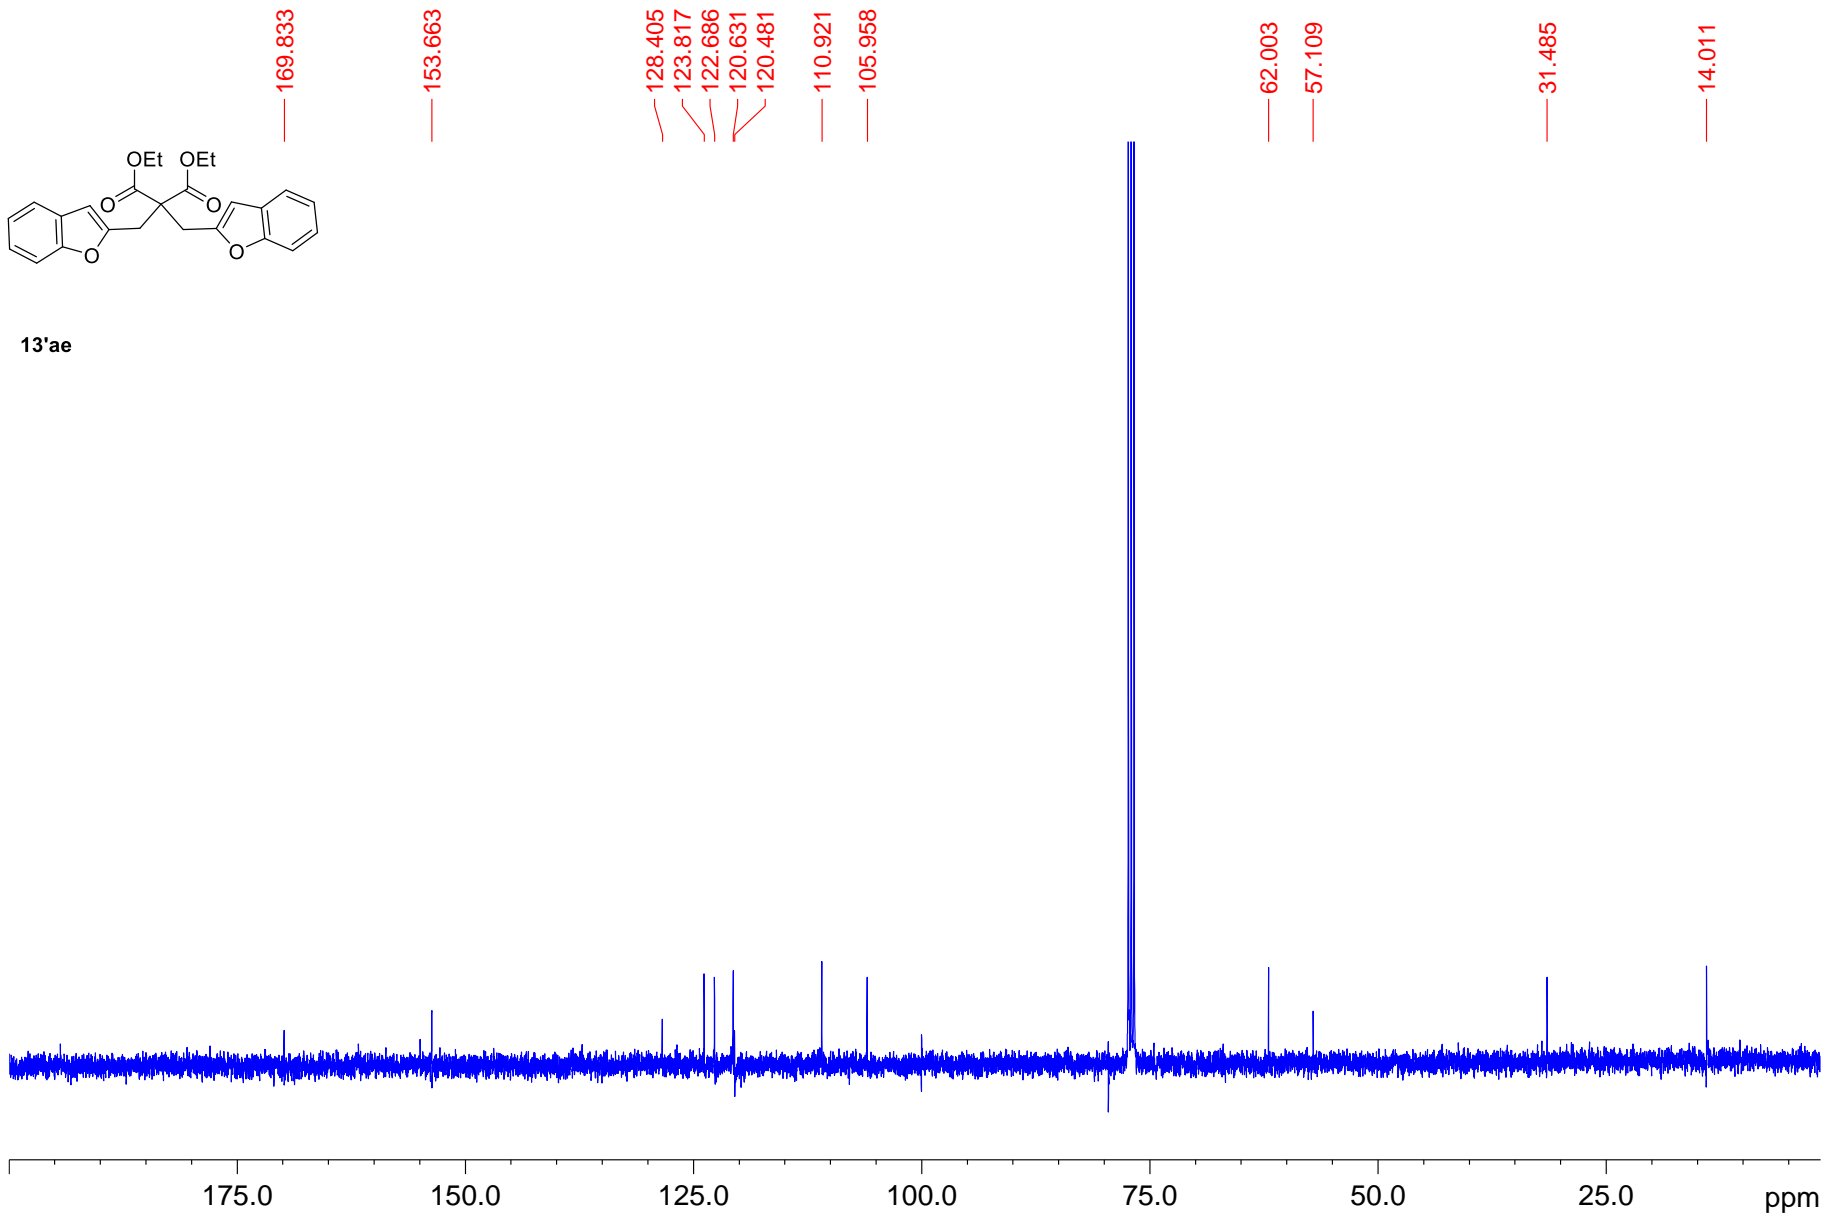

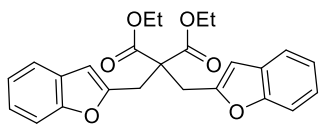

13'ae

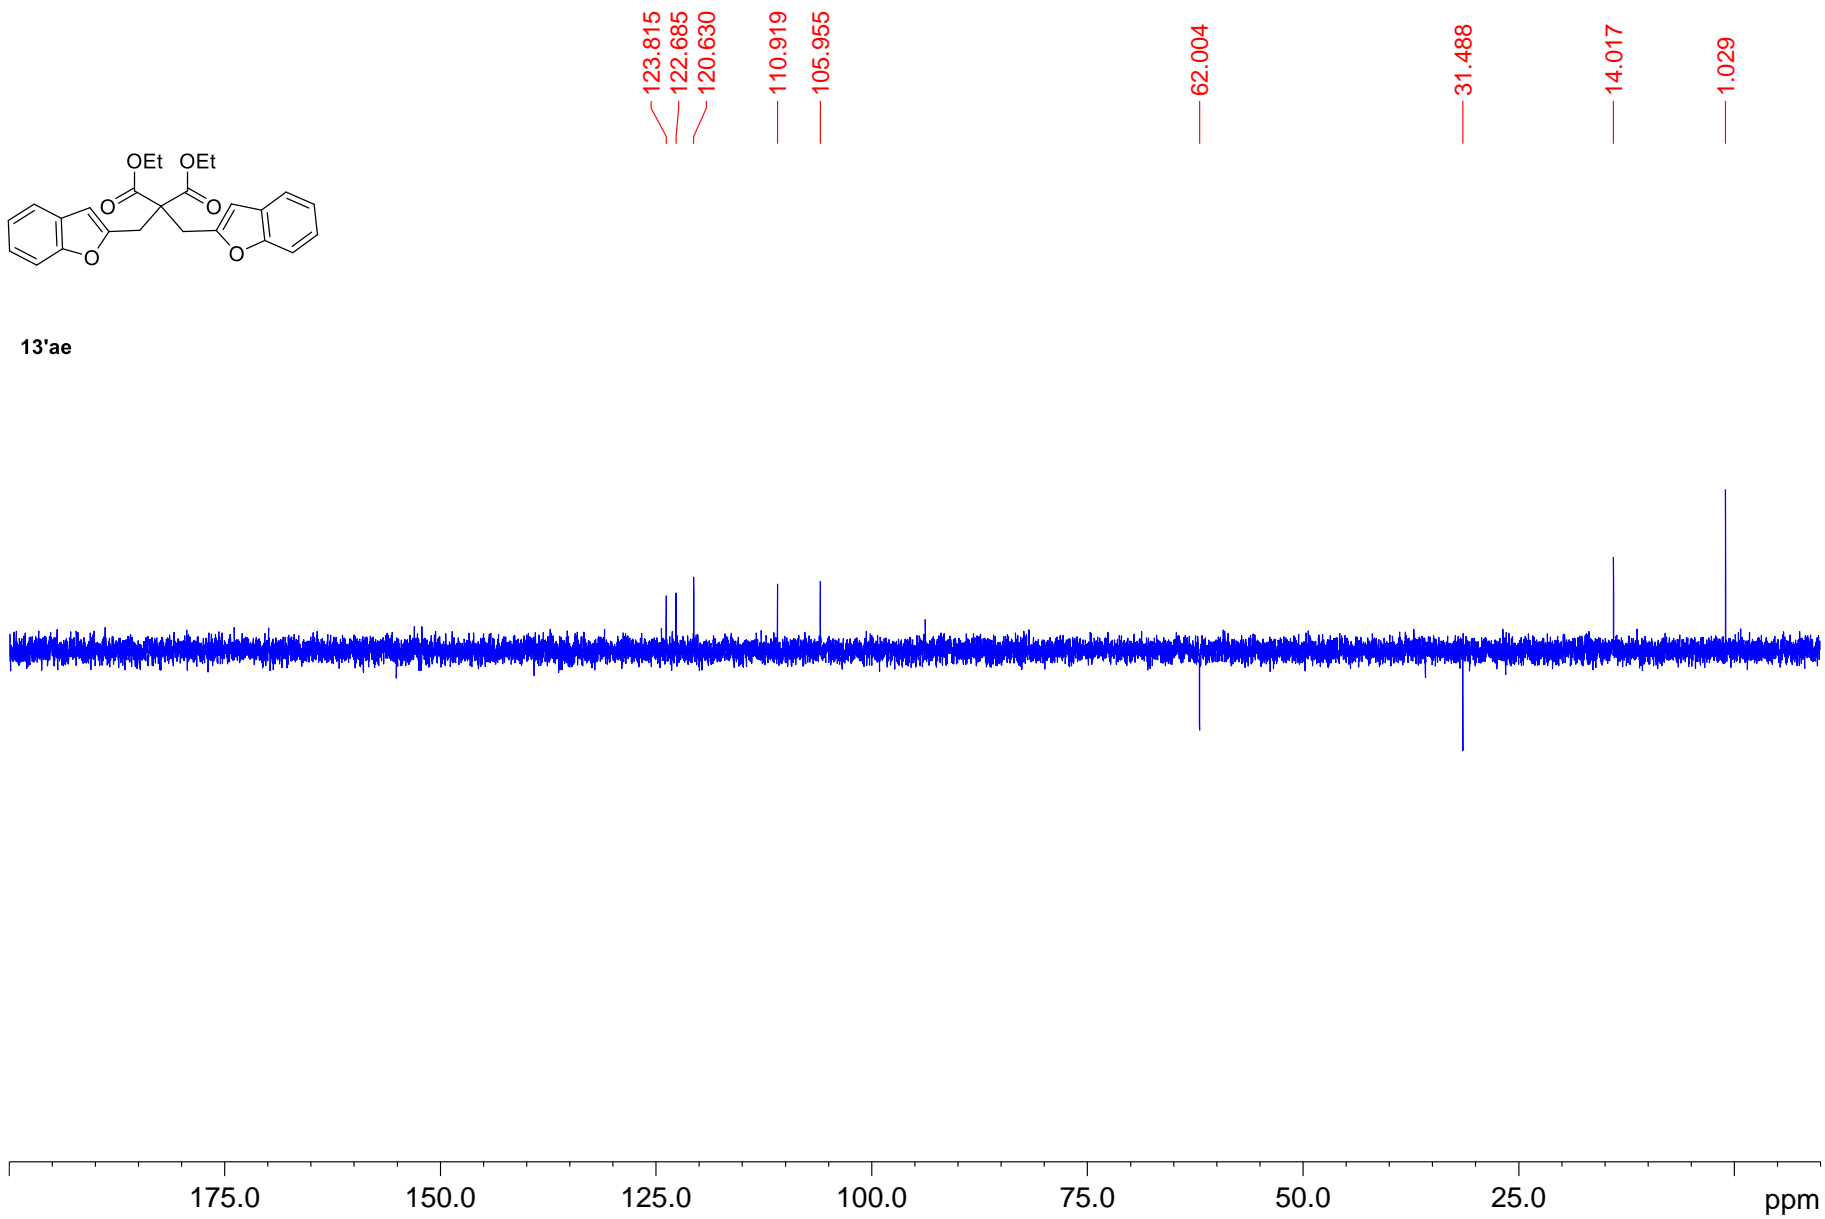



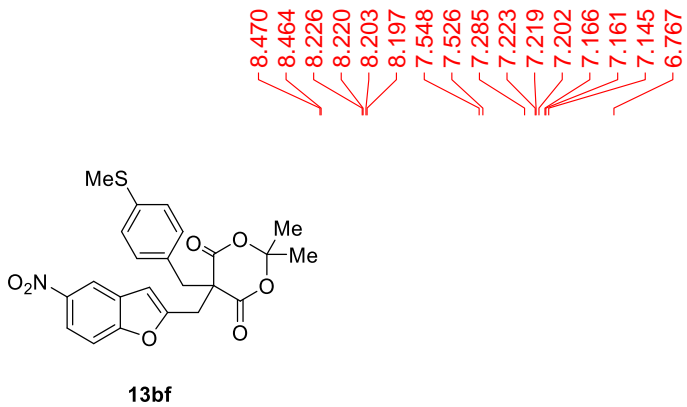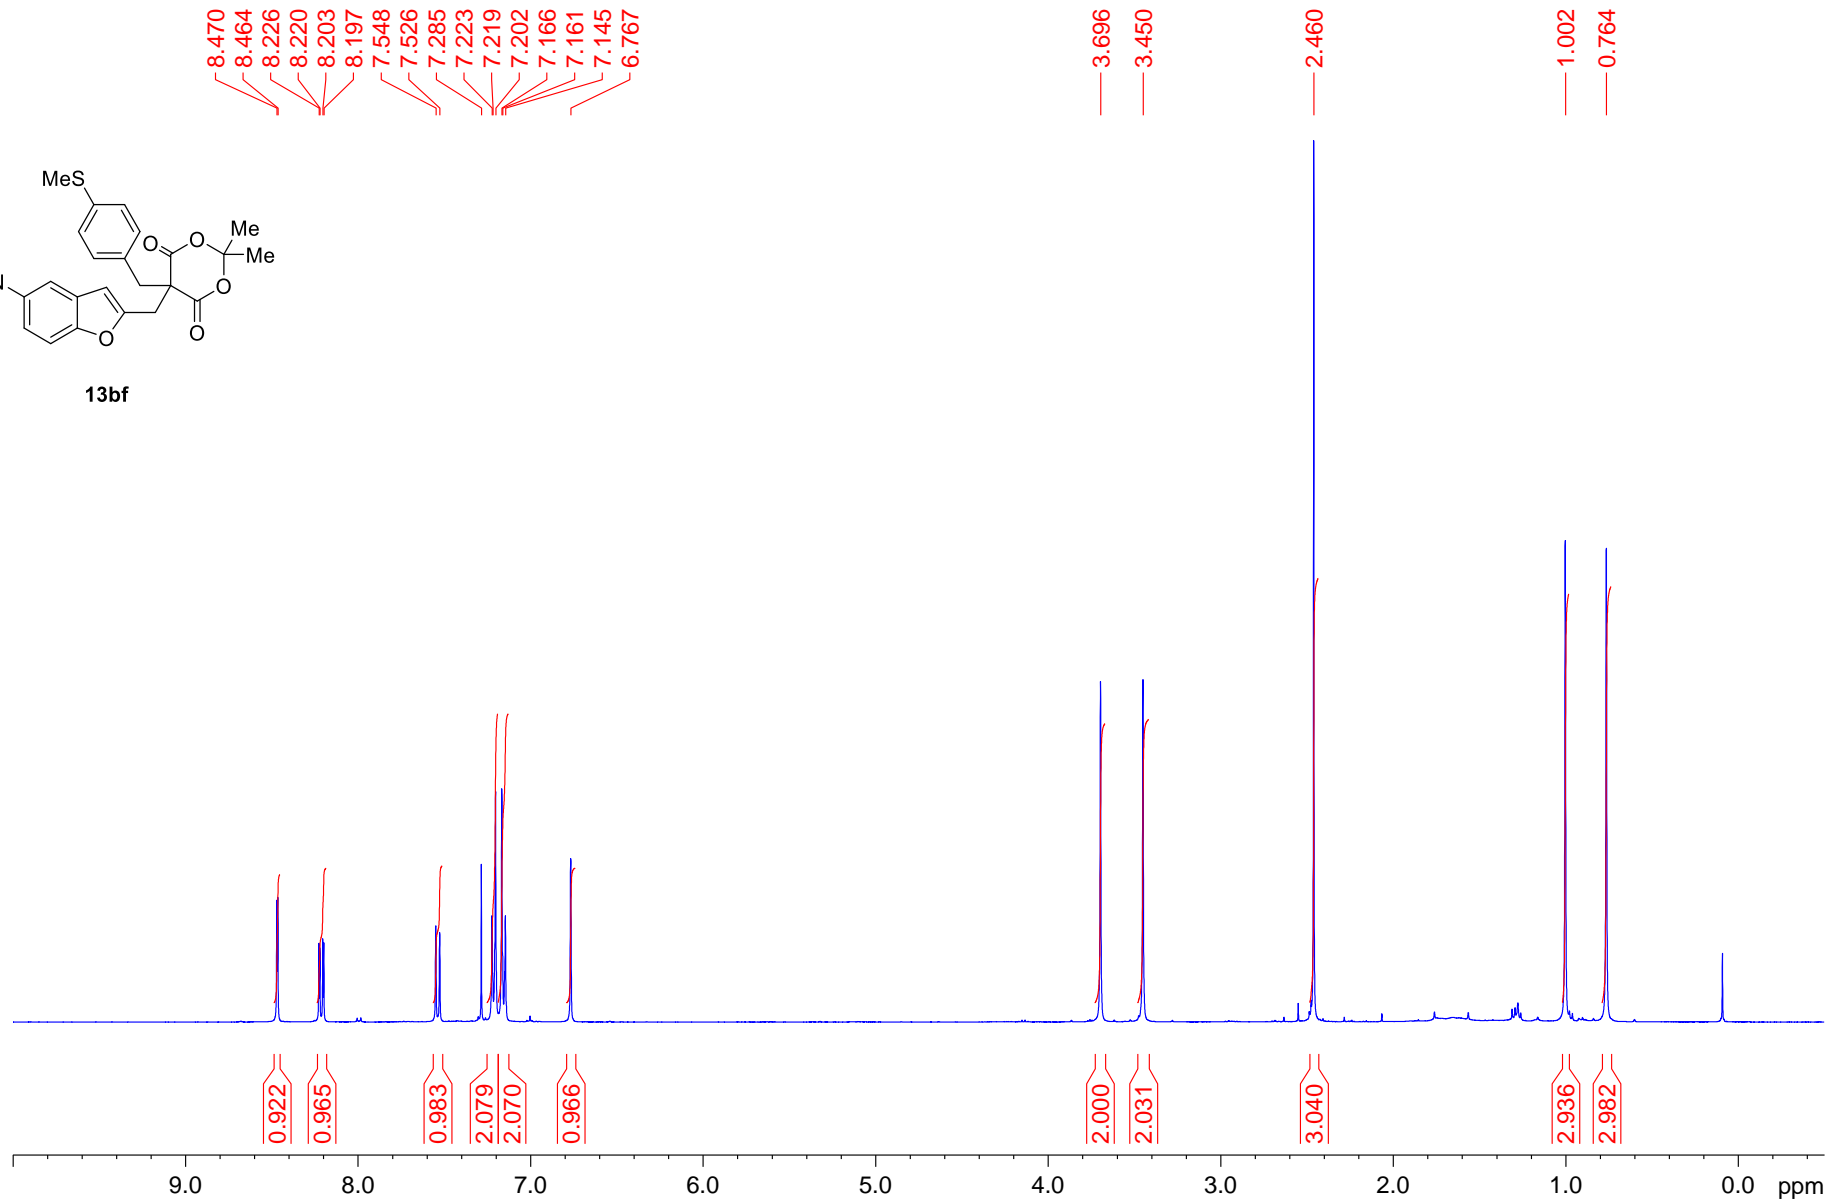

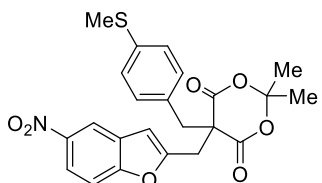

13bf

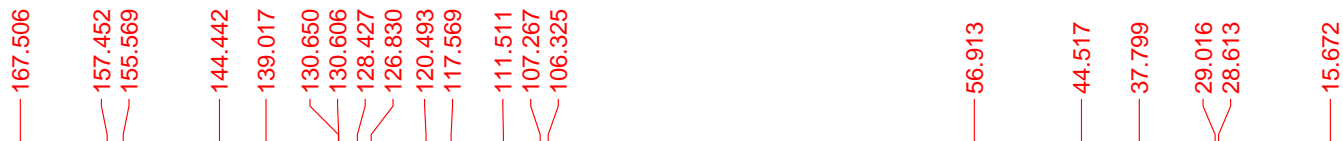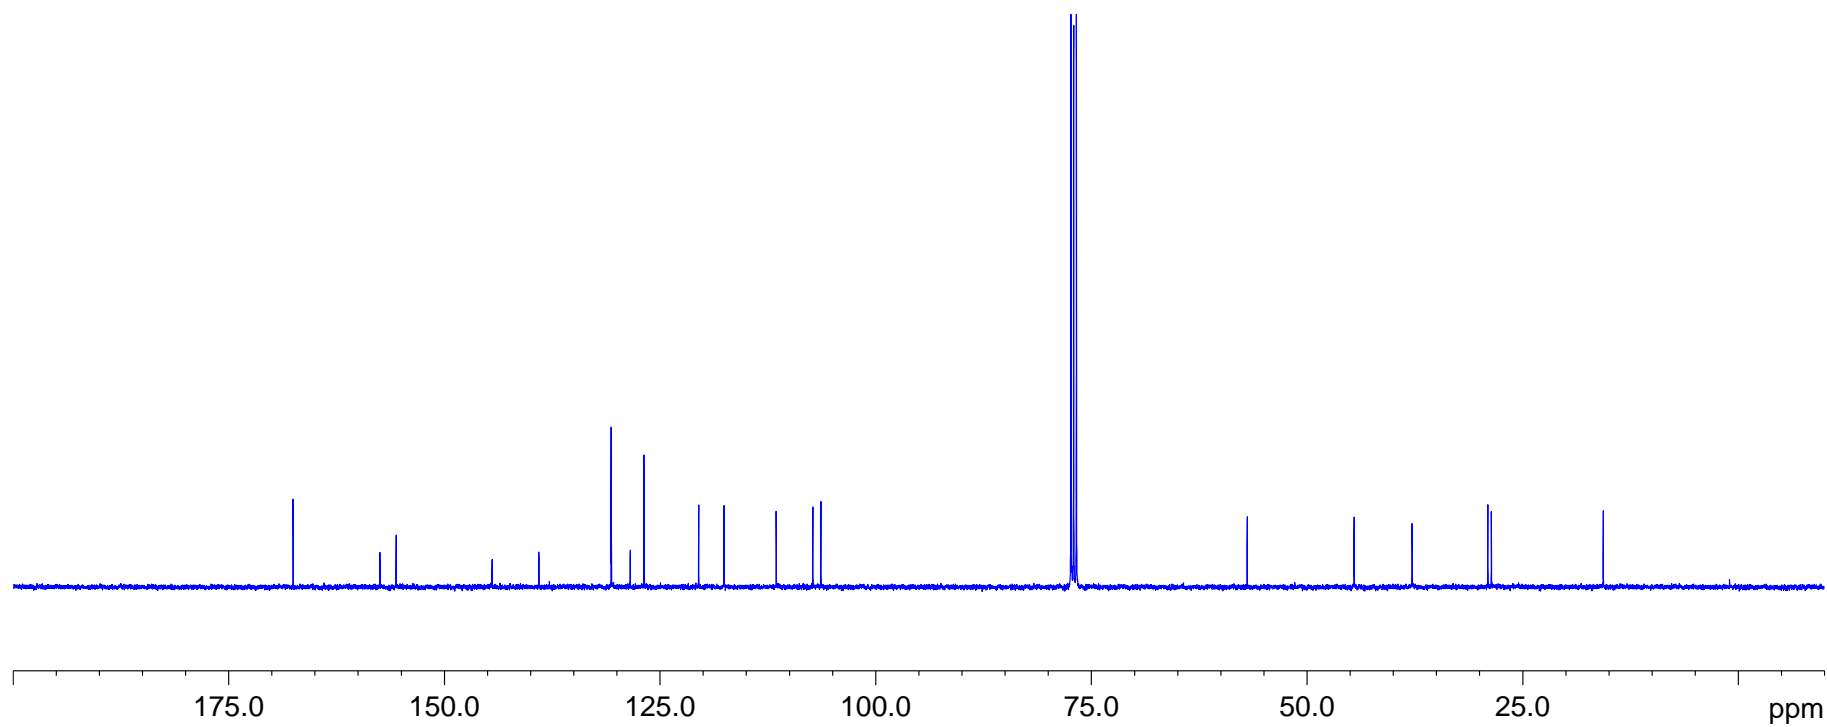

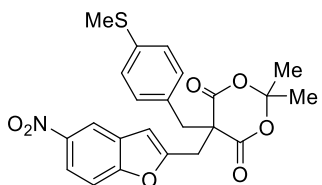

13bf

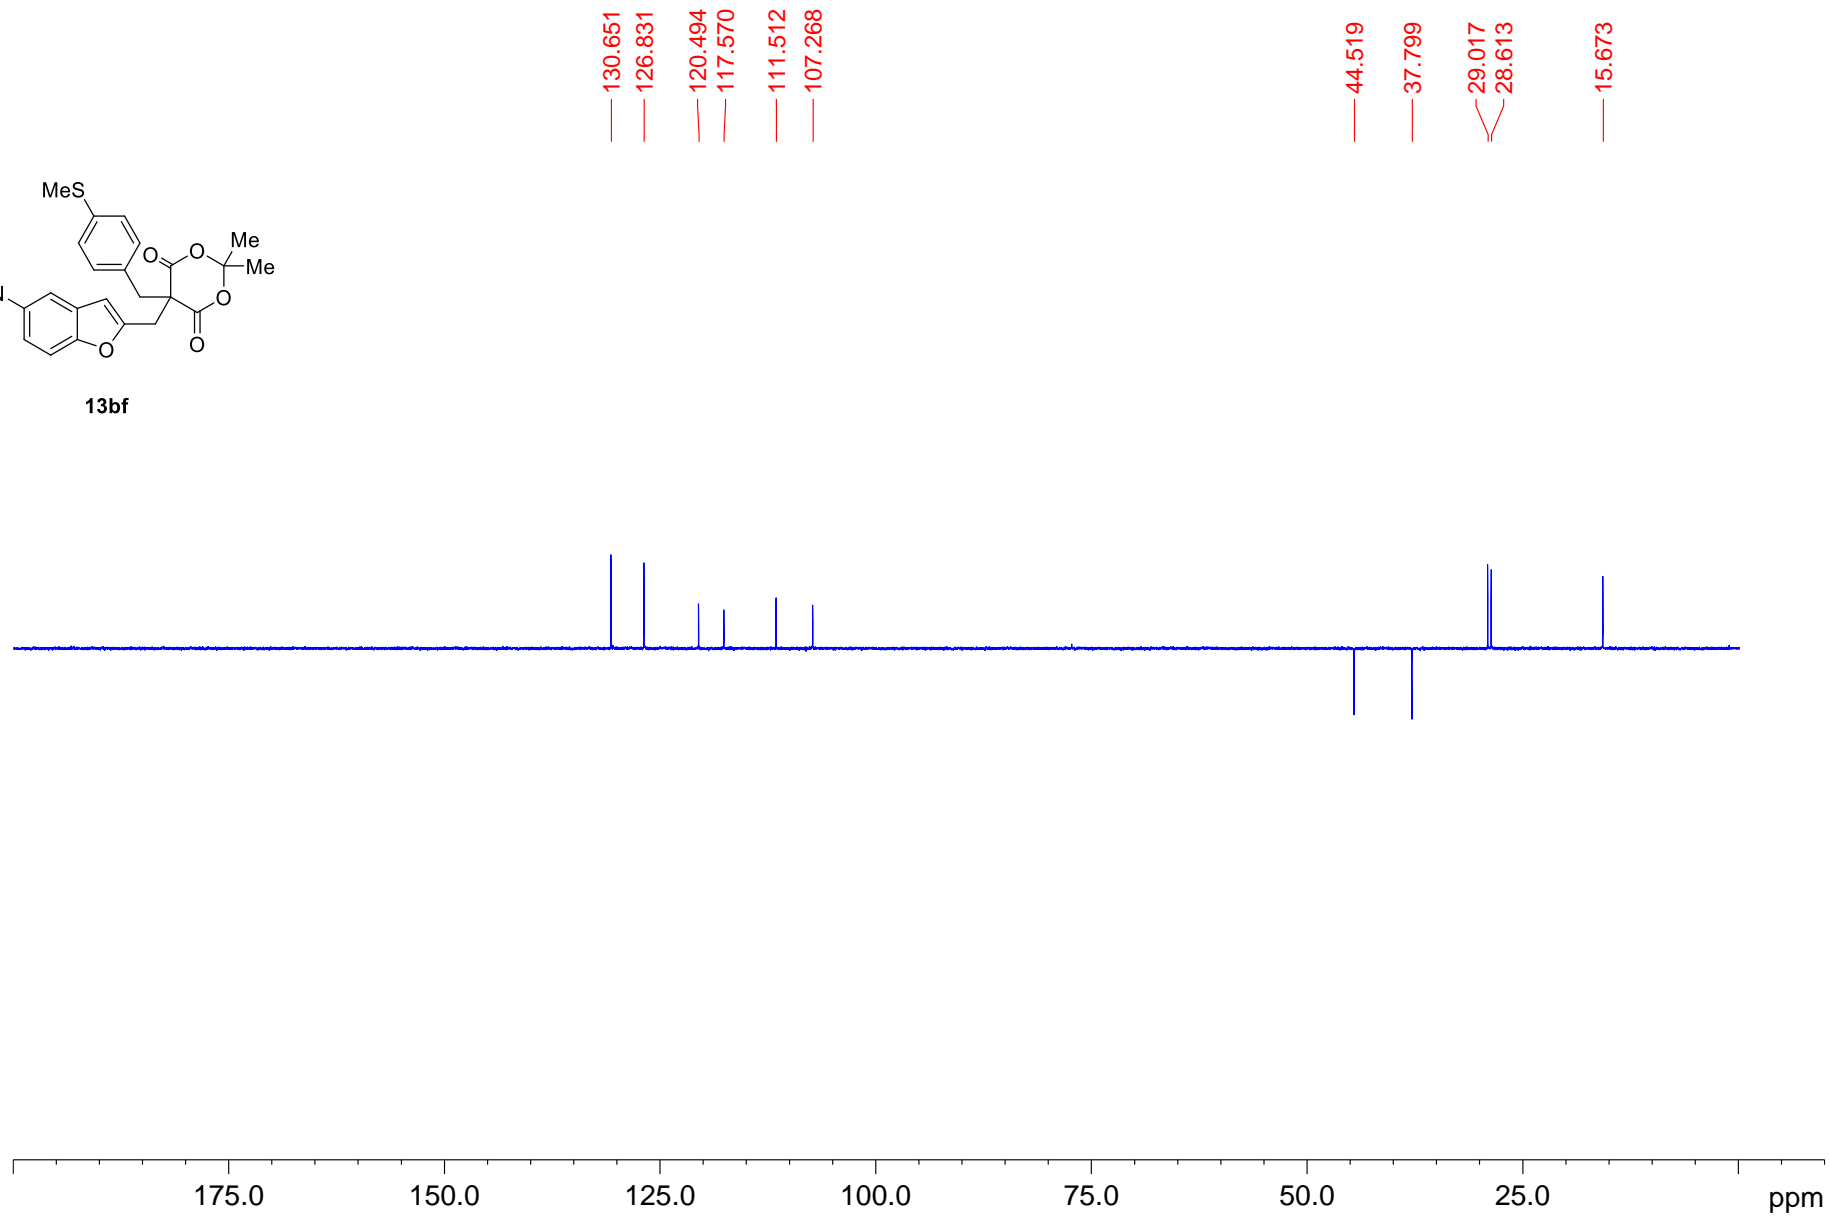

Supplement: d0ra09601f1.pdf [file d0ra09601f1.pdf]
