# Supplementary material for: Palladium-catalyzed Tsuji–Trost-type reaction of benzofuran-2-ylmethyl acetates with nucleophiles
Source: Royal Society of Chemistry journal article supplement (doi:10.1039/d0ra09601f), 2021-01-01
Supplement: d0ra09601f2.pdf [file d0ra09601f2.pdf]

## ELECTRONIC SUPPLEMENTARY INFORMATION

### Palladium-Catalyzed Tsuji–Trost-Type Reaction of benzofuran-2-ylmethyl acetates with nucleophiles

Antonio Arcadi,<sup>a</sup> Giancarlo Fabrizi,<sup>b</sup> Andrea Fochetti,<sup>b</sup> Francesca Ghirga,<sup>c</sup> Antonella Goggiamani,<sup>\*b</sup> Antonia Iazzetti,<sup>\*b</sup> Federico Marrone,<sup>b</sup> Giulia Mazzocanti,<sup>b</sup> Andrea Serraiocco<sup>b</sup>

<sup>a</sup> *Dipartimento di Scienze Fisiche e Chimiche Università degli Studi di L'Aquila; Via Vetoio, 67100 Coppito (AQ), Italy.*

<sup>b</sup> *Dipartimento di Chimica e Tecnologie del Farmaco, Sapienza, Università di Roma, P. le A. Moro 5, 00185 Rome, Italy. E-mail: antonella.goggiamani@uniroma1.it*

<sup>c</sup> *Center for Life Nano Science@Sapienza, Istituto Italiano di Tecnologia, Viale Regina Elena 291, 00161 Rome, Italy.*

#### Contents

|                                                                                                                                                                   |    |
|-------------------------------------------------------------------------------------------------------------------------------------------------------------------|----|
| 1. GENERAL INFORMATION .....                                                                                                                                      | 2  |
| 1.1. Reagents and methods .....                                                                                                                                   | 2  |
| 2. SYNTHETIC PROCEDURES .....                                                                                                                                     | 2  |
| 2.1. Typical procedure for the preparation of benzofuran-2-ylmethanol <b>4a</b> : .....                                                                           | 2  |
| 2.2. Typical procedure for the preparation of benzofuran-2-ylmethyl acetate <b>2a</b> : .....                                                                     | 2  |
| 2.3. Typical procedure for the preparation of 1-(benzofuran-2-ylmethyl)-4-ethylpiperazine <b>6aa</b> : .....                                                      | 3  |
| 2.4. Typical procedure for the preparation of 2-(tosylmethyl)benzofuran <b>8aa</b> : .....                                                                        | 3  |
| 2.5. Typical procedure for the preparation of 2-((4-methoxyphenoxy)methyl)benzofuran <b>10aa</b> : .....                                                          | 4  |
| 2.5. Typical procedure for the preparation of 5-(benzofuran-2-ylmethyl)-2,2,5-trimethyl-1,3-dioxane-4,6-dione <b>13ad</b> : .....                                 | 4  |
| 3. CHARACTERIZATION DATA OF <b>2a – c</b> , <b>4a – c</b> , <b>6aa – bk</b> , <b>8aa – cb</b> , <b>10aa – ci</b> , <b>11</b> , <b>12</b> , <b>13aa – bd</b> ..... | 6  |
| REFERENCES .....                                                                                                                                                  | 19 |

## 1. GENERAL INFORMATION

### 1.1. Reagents and methods

All of the commercially available reagents, catalysts, bases and solvents were used as purchased, without further purification. Starting materials and reaction products were purified by flash chromatography using SiO<sub>2</sub> as stationary phase, eluting with *n*-hexane/ethyl acetate. <sup>13</sup>C NMR (100.6 MHz), and <sup>19</sup>F spectra (376.5 MHz) were recorded with a Bruker Avance 400 spectrometer, equipped with Nanobay console and Cryoprobe Prodigy probe. Splitting patterns are designed as s (singlet), d (doublet), t (triplet), q (quartet), m (multiplet), bs (broad singlet), quint (quintuplet), or sext (sextuplet). IR spectra were recorded with a PerkinElmer SpectrumOne FT-ATR spectrophotometer. HRMS were recorded with an Orbitrap Exactive Mass spectrometer with ESI source. Melting points were determined with a Büchi B-545 apparatus and are uncorrected.

## 2. SYNTHETIC PROCEDURES

### 2.1. Typical procedure for the preparation of benzofuran-2-ylmethanol **4a**:

In a flame dried two-necked round bottom flask charged with a stir bar, LiAlH<sub>4</sub> (2 M, 3.4 mL, 6.787 mmol, 1.1 equiv.) was added drop to drop to a solution of benzofuran-2-carboxylic acid **3a** (1.0 g, 6.170 mmol, 1 equiv.) at 0°C in anhydrous THF (20 mL) under Ar. The mixture was allowed to warm to room temperature and stirred for 2 hours. After the complete consumption of the starting material (TLC, hexane/EtOAc 90/10 v/v), the reaction was cooled down to 0°C and quenched by slow addition of an 80 percent aqueous MeOH solution. The mixture was extracted with AcOEt, washed with brine and the combined organic phase was dried over MgSO<sub>4</sub>, filtered, and concentrated in vacuo. The residue was purified by flash chromatography (silica gel, *n*-hexane/EtOAc 85/15 v/v, *R<sub>f</sub>* = 0.24) to afford 0.713 g of benzofuran-2-ylmethanol **4a** as a white solid (80% yield).

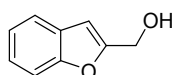

**4a**: pale yellow oil; 80% yield (6.170 mmol scale, 0.713 g); IR (neat): 3347, 2921, 1605, 1454, 1254, 1010; cm<sup>-1</sup>; <sup>1</sup>H NMR (400.13 MHz) (CDCl<sub>3</sub>): δ = 7.58 (dd, *J*<sub>1</sub> = 7.6 Hz, *J*<sub>2</sub> = 0.6 Hz, 1 H), 7.49 (dd, *J*<sub>1</sub> = 8.2 Hz, *J*<sub>2</sub> = 0.6 Hz, 1H), 7.31 (td, *J*<sub>1</sub> = 7.4 Hz, *J*<sub>2</sub> = 1.3 Hz, 1H), 7.24 (td, *J*<sub>1</sub> = 7.4 Hz, *J*<sub>2</sub> = 1.1 Hz, 1H), 6.69 (d, *J* = 0.6 Hz, 1H), 4.80 (s, 2H), 1.96 (bs, 1 H); <sup>13</sup>C NMR (100.6 MHz) (CDCl<sub>3</sub>): δ = 156.5 (q), 155.1 (q), 128.1 (q), 124.4 (CH), 122.8 (CH), 121.1 (CH), 111.3 (CH), 104.1 (CH), 58.1; HRMS: *m/z* [M + Na]<sup>+</sup> calcd for C<sub>9</sub>H<sub>8</sub>O<sub>2</sub>Na: 171.0417; found: 171.0418.

### 2.2. Typical procedure for the preparation of benzofuran-2-ylmethyl acetate **2a**:

To a stirred solution of benzofuran-2-ylmethanol **4a** (0.700 g, 4.7 mmol) in THF (10 mL) was successively added acetic anhydride (280 μL, 5.170 mmol, 1.1 equiv.) and triethylamine (350 μL, 5.640 mmol, 1.2 equiv.) at 0 °C. The mixture was allowed to warm to room temperature and stirred for 24 h. After fully consumption of substrate **4a**, the reaction was quenched with a solution of KHSO<sub>4</sub> (10% w/w), diluted with AcOEt and washed with a saturated NaHCO<sub>3</sub> solution and with brine. The combined organic layer was dried over Na<sub>2</sub>SO<sub>4</sub>, filtered and concentrated under vacuum. The crude product **2a** was pure enough to be used directly in the next step (quantitative yield).

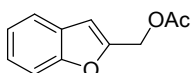

**2a:** colorless oil; quantitative yield (4.7 mmol scale, 0.892 g); IR (neat): 2914, 1698, 1420, 1223, 1045  $\text{cm}^{-1}$ ;  $^1\text{H}$  NMR (400.13 MHz) ( $\text{CDCl}_3$ ):  $\delta$  = 7.59 (dd,  $J_1$  = 7.7 Hz,  $J_2$  = 0.5 Hz, 1 H), 7.51 (dd,  $J_1$  = 8.2 Hz,  $J_2$  = 0.7 Hz, 1 H), 7.33 (td,  $J_1$  = 7.3 Hz,  $J_2$  = 1.3 Hz, 1 H), 7.26 (td,  $J_1$  = 7.5 Hz,  $J_2$  = 1.0 Hz, 1 H), 6.80 (s, 1 H), 5.23 (s, 2H), 2.14 (s, 3H);  $^{13}\text{C}$  NMR (100.6 MHz) ( $\text{CDCl}_3$ ):  $\delta$  = 170.6 (q), 155.2 (q), 151.9 (q), 127.9 (q), 124.9 (CH), 123.0 (CH), 121.3 (CH), 111.4 (CH), 107.0 (CH), 58.6 ( $\text{CH}_2$ ), 20.9 ( $\text{CH}_3$ ); HRMS:  $m/z$  [ $\text{M} + \text{Na}$ ] $^+$  calcd for  $\text{C}_{11}\text{H}_{11}\text{O}_3\text{Na}$ : 213.0522; found: 213.0523.

### 2.3. Typical procedure for the preparation of 1-(benzofuran-2-ylmethyl)-4-ethylpiperazine 6aa:

In a 50 mL Carousel Tube Reactor (Radely Discovery Technology) containing a magnetic stirring bar  $\text{Pd}_2\text{dba}_3$  (9.2 mg, 0.010 mmol, 0.025 equiv.) and dppf (11.1 mg, 0.020 mmol, 0.05 equiv.) were dissolved at room temperature with 1.0 mL of anhydrous MeCN. Then, benzofuran-2-ylmethyl acetate **2a** (76.0 mg, 0.4 mmol, 1.0 equiv.), *N*-ethylpiperazine **5a** (152  $\mu\text{l}$ , 0.80 mmol, 2.0 equiv.),  $\text{K}_2\text{CO}_3$  (165.6 mg, 1.20 mmol, 2.0 equiv.), and 1.0 mL of solvent were added. The mixture was stirred for 24 h at 100  $^\circ\text{C}$  under Ar. After this time, the reaction mixture was cooled to room temperature, diluted with  $\text{Et}_2\text{O}$ , washed with a saturated  $\text{NaHCO}_3$  solution and with brine. The organic extract was dried over  $\text{Na}_2\text{SO}_4$ , filtered and concentrated under reduced pressure. The residue was purified by chromatography on  $\text{SiO}_2$  (25-40  $\mu\text{m}$ ), eluting with a 80/20 (v/v) *n*-hexane/AcOEt mixture ( $R_f$  = 0.22) to obtain 84.9 mg (87% yield) of 1-(benzofuran-2-ylmethyl)-4-ethylpiperazine **6aa**.

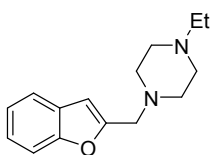

**6aa:** pale yellow oil; 87% yield (84.9 mg); IR (neat): 2935, 2810, 1454, 1254, 1163, 941  $\text{cm}^{-1}$ ;  $^1\text{H}$  NMR (400.13 MHz) ( $\text{CDCl}_3$ ):  $\delta$  = 7.54 (d,  $J$  = 7.4 Hz, 1H), 7.49 (d,  $J$  = 7.9 Hz, 1H), 7.31-7.18 (m, 2H), 6.62 (s, 1H), 3.72 (s, 2H), 2.87-2.27 (m, 10 H), 1.10 (t,  $J$  = 7.6 Hz, 3H);  $^{13}\text{C}$  NMR (100.6 MHz) ( $\text{CDCl}_3$ ):  $\delta$  = 155.1 (q), 154.4 (q), 128.3 (q), 123.9 (CH), 122.6 (CH), 120.7 (CH), 111.3 (CH), 105.7 (CH), 55.5 ( $\text{CH}_2$ ), 53.1 ( $\text{CH}_2$ ), 52.6 ( $\text{CH}_2$ ), 52.2 ( $\text{CH}_2$ ), 11.9 ( $\text{CH}_3$ ); HRMS:  $m/z$  [ $\text{M} + \text{Na}$ ] $^+$  calcd for  $\text{C}_{15}\text{H}_{20}\text{N}_2\text{ONa}$ : 267.1468; found: 267.1471.

### 2.4. Typical procedure for the preparation of 2-(tosylmethyl)benzofuran 8aa:

In a 50 mL Carousel Tube Reactor (Radely Discovery Technology) containing a magnetic stirring bar  $[\text{Pd}(\eta^3\text{-C}_3\text{H}_5\text{Cl})_2]$  (3.7 mg, 0.010 mmol, 0.025 equiv.) and XPhos (9.5 mg, 0.020 mmol, 0.05 equiv.) were dissolved at room temperature with 0.5 mL of anhydrous THF under Ar. Then, benzofuran-2-ylmethyl acetate **2a** (76.0 mg, 0.4 mmol, 1.0 equiv.), sodium 4-tolylsulphinate **7a** (142.5 mg, 0.80 mmol, 2.0 equiv.),  $\text{K}_2\text{CO}_3$  (110.4 mg, 0.80 mmol, 2.0 equiv.), and 1.0 mL of anhydrous MeCN were added. The mixture was stirred for 1 h at 120  $^\circ\text{C}$  under Ar. After this time, the reaction mixture was cooled to room temperature, diluted with  $\text{Et}_2\text{O}$ , washed with brine. The organic extract was dried over  $\text{Na}_2\text{SO}_4$ , filtered and concentrated under reduced pressure. The residue was purified by chromatography on  $\text{SiO}_2$  (25-40  $\mu\text{m}$ ), eluting with a 70/30 (v/v) *n*-hexane/AcOEt mixture ( $R_f$  = 0.24) to obtain 112.2 mg (98% yield) of 12-(tosylmethyl)benzofuran **8aa**.

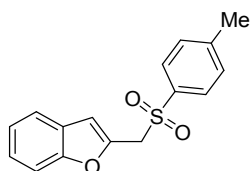

**8aa**: pale yellow solid; 98% yield (112.2 mg); mp: 194-195°C; IR (neat): 1451, 1310, 1144, 1084  $\text{cm}^{-1}$ ;  $^1\text{H}$  NMR (400.13 MHz) ( $\text{CDCl}_3$ ):  $\delta$  = 7.57 (d,  $J$  = 8.1 Hz, 2H), 7.45(d,  $J$ =7.7 Hz, 1H), 7.28 (d,  $J$  = 8.1 Hz, 1H), 7.23-7.11 (m, 4H), 6.59 (s, 1H), 4.45 (s, 2H), 2.35 (s, 3H);  $^{13}\text{C}$  NMR (100.6 MHz) ( $\text{CDCl}_3$ ):  $\delta$  = 155.2 (q), 145.3 (q), 145.1 (q), 135.3 (q), 129.8 (CH), 128.5 (CH), 127.9 (q), 124.9 (CH), 123.1 (CH), 121.2 (CH), 111.3 (CH), 108.9 (CH), 56.5 (CH<sub>2</sub>), 21.7 (CH<sub>3</sub>); HRMS:  $m/z$  [ $\text{M} + \text{Na}$ ]<sup>+</sup> calcd for C<sub>16</sub>H<sub>14</sub>O<sub>3</sub>Na: 309.0556; found: 309.0551.

## 2.5. Typical procedure for the preparation of 2-((4-methoxyphenoxy)methyl)benzofuran 10aa:

In a 50 mL Carousel Tube Reactor (Radely Discovery Technology) containing a magnetic stirring bar [ $\text{Pd}(\eta^3\text{-C}_3\text{H}_5\text{Cl})_2$  (3.7 mg, 0.010 mmol, 0.025 equiv.) and XPhos (9.5 mg, 0.020 mmol, 0.05 equiv.) were dissolved at room temperature with 0.5 mL of anhydrous THF under Ar. Then, benzofuran-2-ylmethyl acetate **2a** (76.0 mg, 0.4 mmol, 1.0 equiv.), 4-methoxyphenol **9a** (99.0 mg, 0.80 mmol, 2.0 equiv.), K<sub>2</sub>CO<sub>3</sub> (110.4 mg, 0.80 mmol, 2.0 equiv.), and 1.0 mL of anhydrous MeCN were added. The mixture was stirred for 1 h at 120 °C under Ar. After this time, the reaction mixture was cooled to room temperature, diluted with Et<sub>2</sub>O, washed with a saturated NaHCO<sub>3</sub> solution and with brine. The organic extract was dried over Na<sub>2</sub>SO<sub>4</sub>, filtered and concentrated under reduced pressure. The residue was purified by chromatography on SiO<sub>2</sub> (25-40  $\mu\text{m}$ ), eluting with a 90/10 (v/v) *n*-hexane/AcOEt mixture ( $R_f$  = 0.19) to obtain 91.5 mg (90% yield) of 2-((4-methoxyphenoxy)methyl)benzofuran **10aa**.

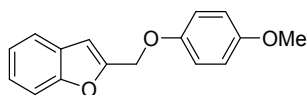

**10aa**: white solid; 90% yield (91.5 mg); mp: 92-93 °C; IR (Neat): 2926, 1505, 1453, 1376, 1225, 1030  $\text{cm}^{-1}$ ;  $^1\text{H}$  NMR (400.13 MHz) ( $\text{CDCl}_3$ ):  $\delta$  = 7.59 (d,  $J$  = 7.6 Hz, 1H), 7.53 (d,  $J$  = 8.2 Hz, 1H), 7.35-7.30 (m, 1H), 7.28-7.23 (m, 1H), 6.98 (d,  $J$  = 9.1 Hz, 2H), 6.88 (d,  $J$  = 9.1 Hz, 2H), 6.79 (s, 1H), 5.14 (s, 2H), 3.80 (s, 3H);  $^{13}\text{C}$  NMR (100.6 MHz) ( $\text{CDCl}_3$ ):  $\delta$  = 155.2 (q), 154.4 (q), 153.2 (q), 152.4 (q), 128.0 (q), 124.6 (CH), 122.9 (CH), 121.2 (CH), 116.2 (CH), 114.7 (CH), 111.4 (CH), 106.0 (CH), 64.0 (CH<sub>2</sub>), 55.7 (CH<sub>3</sub>); HRMS:  $m/z$  [ $\text{M} + \text{Na}$ ]<sup>+</sup> calcd for C<sub>16</sub>H<sub>14</sub>O<sub>3</sub>Na: 277.0835; found: 277.0833.

## 2.5. Typical procedure for the preparation of 5-(benzofuran-2-ylmethyl)-2,2,5-trimethyl-1,3-dioxane-4,6-dione 13ad:

In a 50 mL Carousel Tube Reactor (Radely Discovery Technology) containing a magnetic stirring bar [ $\text{Pd}(\eta^3\text{-C}_3\text{H}_5\text{Cl})_2$  (3.7 mg, 0.010 mmol, 0.025 equiv.) and XPhos (9.5 mg, 0.020 mmol, 0.05 equiv.) were dissolved at room temperature with 0.5 mL of anhydrous THF under Ar. Then, benzofuran-2-ylmethyl acetate **2a** (76.0 mg, 0.4 mmol, 1.0 equiv.), 2,2,5-trimethyl-1,3-dioxane-4,6-dione **12d** (126.4 mg, 0.80 mmol, 2.0 equiv.), K<sub>2</sub>CO<sub>3</sub> (110.4 mg, 0.80 mmol, 2.0 equiv.), and 1.0 mL of anhydrous MeCN were added. The mixture was stirred for 1 h at 120 °C under Ar. After this time, the reaction mixture was cooled to room temperature, diluted with Et<sub>2</sub>O, washed with a saturated NaHCO<sub>3</sub> solution and with brine. The organic extract was dried over Na<sub>2</sub>SO<sub>4</sub>, filtered and concentrated under reduced pressure. The residue was purified by chromatography on SiO<sub>2</sub> (25-40  $\mu\text{m}$ ), eluting with a 95/5 (v/v) *n*-hexane/AcOEt mixture ( $R_f$  = 0.19) to obtain 111.9 mg (97% yield) of 5-(benzofuran-2-ylmethyl)-2,2,5-trimethyl-1,3-dioxane-4,6-dione **13ad**.

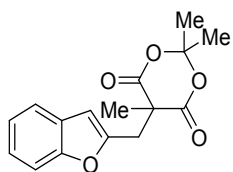

**13ad**: pale yellow oil; 97% yield (111.9 mg); IR (neat): 2923, 1776, 1737, 1453, 1380, 1251, 1055  $\text{cm}^{-1}$ ;  $^1\text{H}$  NMR (400.13 MHz) ( $\text{CDCl}_3$ ):  $\delta$  = 7.52-7.47 (m, 1H), 7.44-7.40 (m, 1H), 7.25 (td,  $J_1 = 7.2$ ,  $J_2 = 1.4$ , 1H), 7.25 (td,  $J_1 = 7.2$  Hz,  $J_2 = 1.4$  Hz, 1H), 6.55 (s, 1H), 3.56 (s, 2H), 1.80 (s, 3H), 1.71 (s, 3H), 1.28 (s, 3H);  $^{13}\text{C}$  NMR (100.6 MHz) ( $\text{CDCl}_3$ ):  $\delta$  = 169.3 (q), 154.7 (q), 152.2 (q), 128.1 (q), 124.3 (CH), 122.9 (CH), 120.9 (CH), 111.1 (CH), 106.0 (CH), 105.5 (q), 49.6 (q), 37.8 (CH<sub>2</sub>), 29.3 (CH<sub>3</sub>), 28.4 (CH<sub>3</sub>), 25.7 (CH<sub>3</sub>); HRMS:  $m/z$  [ $\text{M} + \text{Na}$ ]<sup>+</sup> calcd for C<sub>16</sub>H<sub>16</sub>O<sub>5</sub>Na: 311.0890; found: 311.0890.

### 3. CHARACTERIZATION DATA OF 2a – c, 4a – c, 6aa – bk, 8aa – cb, 10aa – ci, 11, 12, 13aa –bd

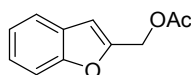

**2a:** colorless oil; quantitative yield (4.7 mmol scale, 0.892 g); IR (neat): 2914, 1698, 1420, 1223, 1045  $\text{cm}^{-1}$ ;  $^1\text{H}$  NMR (400.13 MHz) ( $\text{CDCl}_3$ ):  $\delta$  = 7.59 (dd,  $J_1$  = 7.7 Hz,  $J_2$  = 0.5 Hz, 1 H), 7.51 (dd,  $J_1$  = 8.2 Hz,  $J_2$  = 0.7 Hz, 1 H), 7.33 (td,  $J_1$  = 7.3 Hz,  $J_2$  = 1.3 Hz, 1 H), 7.26 (td,  $J_1$  = 7.5 Hz,  $J_2$  = 1.0 Hz, 1 H), 6.80 (s, 1 H), 5.23 (s, 2H), 2.14 (s, 3H);  $^{13}\text{C}$  NMR (100.6 MHz) ( $\text{CDCl}_3$ ):  $\delta$  = 170.6 (q), 155.2 (q), 151.9 (q), 127.9 (q), 124.9 (CH), 123.0 (CH), 121.3 (CH), 111.4 (CH), 107.0 (CH), 58.6 ( $\text{CH}_2$ ), 20.9 ( $\text{CH}_3$ ); HRMS:  $m/z$  [ $\text{M} + \text{Na}$ ] $^+$  calcd for  $\text{C}_{11}\text{H}_{10}\text{O}_3\text{Na}$ : 213.0522; found: 213.0523.

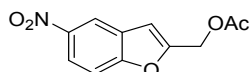

**2b:** yellow solid; 95% yield; (4.0 mmol scale, 0.893 g); mp: 90-91°C; IR (neat): 1732, 1549, 1244, 1019  $\text{cm}^{-1}$ ;  $^1\text{H}$  NMR (400.13 MHz) ( $\text{CDCl}_3$ ):  $\delta$  = 8.50 (d,  $J$  = 2.3 Hz, 1H), 8.24 (dd,  $J_1$  = 9.1 Hz,  $J_2$  = 2.3 Hz, 1H), 7.56 (d,  $J$  = 9.1 Hz, 1H), 6.91 (d,  $J$  = 0.5 Hz, 1H), 5.23 (s, 2H), 2.14 (s, 3H);  $^{13}\text{C}$  NMR (100.6 MHz) ( $\text{CDCl}_3$ ):  $\delta$  = 170.3 (q), 157.9 (q), 155.5 (q), 144.3 (q), 128.3 (q), 120.7 (CH), 117.9 (CH), 111.8 (CH), 107.4 (CH), 58.1 ( $\text{CH}_2$ ), 20.7 ( $\text{CH}_3$ ); HRMS:  $m/z$  [ $\text{M} + \text{Na}$ ] $^+$  calcd for  $\text{C}_{11}\text{H}_9\text{NO}_5\text{Na}$ : 258.0373; found: 258.0371.

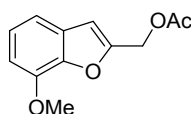

**2c:** dark yellow oil; 97% yield (4.0 mmol scale, 0.853 g); IR (neat): 2940, 1739, 1493, 1377, 1363, 1220, 1203, 1094, 1024  $\text{cm}^{-1}$ ;  $^1\text{H}$  NMR (400.13 MHz) ( $\text{CDCl}_3$ ):  $\delta$  = 7.19-7.16 (m, 2H), 6.86-6.81 (m, 1H), 6.79 (s, 1H), 5.22 (s, 2H), 4.03 (s, 3H), 2.12 (s, 3H);  $^{13}\text{C}$  NMR (100.6 MHz) ( $\text{CDCl}_3$ ):  $\delta$  = 170.5 (q), 152.0 (q), 145.3 (q), 144.6 (q), 129.5 (q), 123.7 (CH), 113.6 (CH), 107.4 (CH), 106.7 (CH), 58.5 ( $\text{CH}_2$ ), 56.0 ( $\text{CH}_3$ ), 20.8 ( $\text{CH}_3$ ); HRMS:  $m/z$  [ $\text{M} + \text{Na}$ ] $^+$  calcd for  $\text{C}_{12}\text{H}_{12}\text{O}_4\text{Na}$ : 243.0628; found: 243.0628.

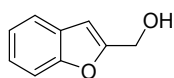

**4a:** pale yellow oil; 80% yield (6.170 mmol scale, 0.713 g); IR (neat): 3347, 2921, 1605, 1454, 1254, 1010  $\text{cm}^{-1}$ ;  $^1\text{H}$  NMR (400.13 MHz) ( $\text{CDCl}_3$ ):  $\delta$  = 7.58 (dd,  $J_1$  = 7.6 Hz,  $J_2$  = 0.6 Hz, 1 H), 7.49 (dd,  $J_1$  = 8.2 Hz,  $J_2$  = 0.6 Hz, 1H), 7.31 (td,  $J_1$  = 7.4 Hz,  $J_2$  = 1.3 Hz, 1H), 7.24 (td,  $J_1$  = 7.4 Hz,  $J_2$  = 1.1 Hz, 1H), 6.69 (d,  $J$  = 0.6 Hz, 1H), 4.80 (s, 2H), 1.96 (bs, 1 H);  $^{13}\text{C}$  NMR (100.6 MHz) ( $\text{CDCl}_3$ ):  $\delta$  = 156.5 (q), 155.1 (q), 128.1 (q), 124.4 (CH), 122.8 (CH), 121.1 (CH), 111.3 (CH), 104.1 (CH), 58.1; HRMS:  $m/z$  [ $\text{M} + \text{Na}$ ] $^+$  calcd for  $\text{C}_9\text{H}_8\text{O}_2\text{Na}$ : 171.0417; found: 171.0418.

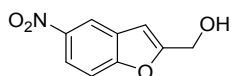

**4b:** pale yellow solid; quantitative yield (4.0 mmol scale, 0.772 g); mp: 90-91°C; IR (neat): 3407, 1517, 1342, 1016  $\text{cm}^{-1}$ ;  $^1\text{H}$  NMR (400.13 MHz) ( $\text{CDCl}_3$ ):  $\delta$  = 8.48 (d,  $J$  = 2.3 Hz, 1H), 8.21 (dd,  $J_1$  = 9.1 Hz,  $J_2$  = 2.3 Hz, 1H), 7.53 (d,  $J$  = 9.1 Hz, 1H), 6.81 (d,  $J$  = 0.74 Hz, 1H), 4.83 (s, 2H), 2.09 (s, 1H);  $^{13}\text{C}$  NMR (100.6 MHz) ( $\text{CDCl}_3$ ):  $\delta$  =

160.0 (q), 157.9 (q), 144.2 (q), 128.5(q), 120.3 (CH), 117.7 (CH), 111.6 (CH), 104.7 (CH), 57.9 (CH<sub>2</sub>); HRMS:  $m/z$  [M + Na]<sup>+</sup> calcd for C<sub>9</sub>H<sub>7</sub>NO<sub>4</sub>Na: 216.0267; found: 216.0265.

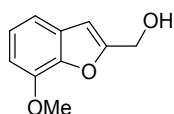

**4c**: pale yellow solid; quantitative yield (4.0 mmol scale, 0.712 g); mp 45-46 °C, lit. <sup>1</sup>46-47 °C. IR (Neat): 3392, 2941, 2840, 1735, 1606, 1622, 1588, 1436, 1284, 1096 cm<sup>-1</sup>; <sup>1</sup>H NMR (400.13 MHz) (CDCl<sub>3</sub>): δ = 7.18-7.11 (m, 2H), 6.83-6.76 (m, 1H), 6.66 (s, 1H), 4.79 (d,  $J$  = 5.4 Hz, 2H), 4.00 (s, 3H), 1.65 (t,  $J$  = 5.4 Hz, 1H); <sup>13</sup>C NMR (100.6 MHz) (CDCl<sub>3</sub>): δ = 156.8 (q), 145.3 (q), 144.3 (q), 129.8 (q), 123.5 (CH), 113.5 (CH), 106.4 (CH), 104.4 (CH), 58.0 (CH<sub>2</sub>), 56.0 (CH<sub>3</sub>); HRMS:  $m/z$  [M + Na]<sup>+</sup> calcd for C<sub>10</sub>H<sub>10</sub>O<sub>3</sub>Na: 201.0522; found: 201.0519.

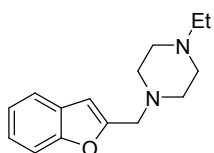

**6aa**: pale yellow oil; 87% yield (84.9 mg); IR (neat): 2935, 2810, 1454, 1254, 1163, 941 cm<sup>-1</sup>; <sup>1</sup>H NMR (400.13 MHz) (CDCl<sub>3</sub>): δ = 7.54 (d,  $J$  = 7.4 Hz, 1H), 7.49 (d,  $J$  = 7.9 Hz, 1H), 7.31-7.18 (m, 2H), 6.62 (s, 1 H), 3.72 (s, 2H), 2.87-2.27 (m, 10 H), 1.10 (t,  $J$  = 7.6 Hz, 3H); <sup>13</sup>C NMR (100.6 MHz) (CDCl<sub>3</sub>): δ = 155.1 (q), 154.4 (q), 128.3 (q), 123.9 (CH), 122.6 (CH), 120.7 (CH), 111.3 (CH), 105.7 (CH), 55.5 (CH<sub>2</sub>), 53.1 (CH<sub>2</sub>), 52.6 (CH<sub>2</sub>), 52.2 (CH<sub>2</sub>), 11.9 (CH<sub>3</sub>); HRMS:  $m/z$  [M + Na]<sup>+</sup> calcd for C<sub>15</sub>H<sub>20</sub>N<sub>2</sub>O<sub>2</sub>Na: 267.1468; found: 267.1471.

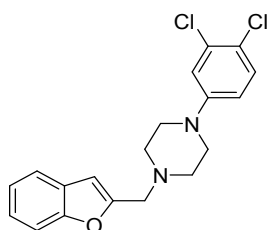

**6ab**: pale yellow solid; 78% yield (112.7 mg); mp: 113-114°C; IR (neat): 2843, 1592, 1453, 1385, 1240, 1138 cm<sup>-1</sup>; <sup>1</sup>H NMR (400.13 MHz) (CDCl<sub>3</sub>): δ = 7.57-7.54 (m, 1H), 7.53-7.49 (m, 1H), 7.32- 7.21 (m, 3H), 6.96 (d,  $J$ =2.9 Hz, 1H), 6.74 (dd,  $J_1$  = 8.6  $J_2$  = 2.9, 1H), 6.66 (s, 1H), 3.77 (s, 2H), 3.28-3.18 (m, 4H), 2.78-2.66 (m, 4H); <sup>13</sup>C NMR (100.6 MHz) (CDCl<sub>3</sub>): δ = 155.1 (q), 154.0 (q), 150.6 (q), 132.8 (q), 130.4 (CH), 128.2 (q), 124.1 (CH), 122.8 (CH), 122.2 (q), 120.8 (CH), 117.3 (CH), 115.3 (CH), 111.3 (CH), 105.9 (CH), 55.4 (CH<sub>2</sub>), 52.7 (CH<sub>2</sub>), 48.6 (CH<sub>2</sub>); HRMS:  $m/z$  [M + H]<sup>+</sup> calcd for C<sub>19</sub>H<sub>19</sub>Cl<sub>2</sub>N<sub>2</sub>O: 361.0869; found: 361.0865.

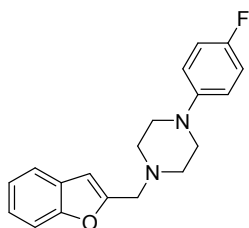

**6ac**: pale yellow solid; 76% yield (94.3 mg); mp: 91-92°C; IR (neat): 2811, 1510, 1453, 1384, 1229, 1142 cm<sup>-1</sup>; <sup>1</sup>H NMR (400.13 MHz) (CDCl<sub>3</sub>): δ = 7.59-7.49 (m, 2H), 7.34-7.20 (m, 2H), 7.02-6.93 (m, 2H), 6.93-6.85 (m, 2H), 6.66 (s, 1H), 3.78 (s, 2H), 3.19 (bt, *J* = 4.9 Hz, 4H), 2.75 (bt, *J* = 4.9 Hz, 4H); <sup>13</sup>C NMR (100.6 MHz) (CDCl<sub>3</sub>): δ = 157.2 (q) (d, *J* = 239 Hz), 155.1 (q), 154.2 (q), 147.9 (q) (d, *J* = 2 Hz), 128.2 (q), 124.0 (CH), 122.7 (CH), 120.7 (CH), 115.2 (CH) (d, *J* = 8 Hz), 115.5 (CH) (d, *J* = 22 Hz), 111.3 (CH), 105.9 (CH), 55.5 (CH<sub>2</sub>), 53.1 (CH<sub>2</sub>), 50.1 (CH<sub>2</sub>); <sup>19</sup>F NMR (376.5 MHz) (CDCl<sub>3</sub>): δ = -124.5; HRMS: *m/z* [M + H]<sup>+</sup> calcd for C<sub>19</sub>H<sub>20</sub>FN<sub>2</sub>O: 311.1554; found: 311.1555.

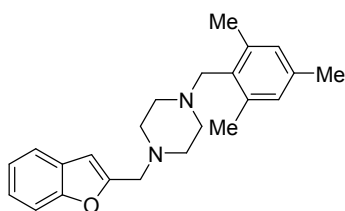

**6ad**: pale yellow solid; 88% yield (122.7mg); mp: 117-118°C; IR (neat): 2919, 2807, 1454, 1253, 1137, 1008 cm<sup>-1</sup>; <sup>1</sup>H NMR (400.13 MHz) (CDCl<sub>3</sub>): δ = 7.56-7.50 (m, 2H), 7.31-7.21 (m, 2H), 6.87 (s, 2H), 6.61 (s, 1H), 3.70 (s, 2H), 3.50 (s, 2H), 2.63-2.57 (bs, 8H), 2.38 (s, 6H), 2.30 (s, 3H); <sup>13</sup>C NMR (100.6 MHz) (CDCl<sub>3</sub>): δ = 155.1 (q), 154.7 (q), 138.1 (q), 136.3 (q), 131.9 (q), 128.9 (CH), 128.4 (q), 123.9 (CH), 122.6 (CH), 120.7 (CH), 111.3 (CH), 105.5 (CH), 55.8 (CH<sub>2</sub>), 55.5 (CH<sub>2</sub>), 53.4 (CH<sub>2</sub>), 52.5 (CH<sub>2</sub>), 20.9 (CH<sub>3</sub>), 20.1 (CH<sub>3</sub>); HRMS: *m/z* [M + H]<sup>+</sup> calcd for C<sub>23</sub>H<sub>29</sub>N<sub>2</sub>O: 349.2274; found: 349.2273.

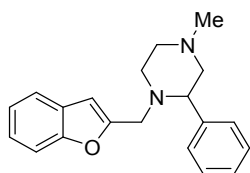

**6ae**: pale yellow solid; 94% yield (115.2 mg); mp: 80-81°C; IR (neat): 2935, 2794, 1454, 1149, 1026, 940 cm<sup>-1</sup>; <sup>1</sup>H NMR (400.13 MHz) (CDCl<sub>3</sub>): δ = 7.55-7.43 (m, 4H), 7.40 (t, *J* = 7.2 Hz, 2H), 7.34-7.29 (m, 1H), 7.27-7.16 (m, 2H), 6.49 (s, 1H), 3.84 (d, *J* = 14.7, 1H), 3.50 (dd, *J*<sub>1</sub> = 10.3 Hz, *J*<sub>2</sub> = 2.8 Hz, 1H), 3.36 (d, *J* = 14.7, 1H), 3.08 (dt, *J*<sub>1</sub> = 11.5 Hz, *J*<sub>2</sub> = 2.4 Hz, 1H), 2.86-2.78 (m, 2H), 2.59 (td, *J*<sub>1</sub> = 11.5 Hz, *J*<sub>2</sub> = 2.8 Hz, 1H), 2.34-2.26 (m, 4H), 2.16 (t, *J* = 10.7 Hz, 1H); <sup>13</sup>C NMR (100.6 MHz) (CDCl<sub>3</sub>): δ = 155.2 (q), 155.0 (q), 141.3 (q), 128.6 (CH), 128.4 (q), 128.1 (CH), 127.7 (CH), 123.6 (CH), 122.5 (CH), 120.5 (CH), 111.2 (CH), 105.3 (CH), 66.4 (CH), 63.9 (CH<sub>2</sub>), 55.2 (CH<sub>2</sub>), 52.2 (CH<sub>2</sub>), 51.4 (CH<sub>2</sub>), 45.8 (CH<sub>3</sub>); HRMS: *m/z* [M + H]<sup>+</sup> calcd for C<sub>20</sub>H<sub>23</sub>N<sub>2</sub>O: 307.1805; found: 307.1804.

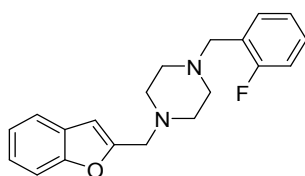

**6af**: yellow wax; 91% yield (118.1 mg); IR (neat): 2936, 2813, 1586, 1490, 1455, 1010 cm<sup>-1</sup>; <sup>1</sup>H NMR (400.13 MHz) (CDCl<sub>3</sub>): δ = 7.56-7.46 (m, 2H), 7.36 (dt, *J*<sub>1</sub> = 7.4 Hz, *J*<sub>2</sub> = 1.7 Hz, 1H), 7.29-7.18 (m, 3H), 7.10 (dt, *J*<sub>1</sub> = 7.4 Hz, *J*<sub>2</sub> = 1.1 Hz, 1H), 7.07-7.00 (m, 1H), 6.60 (s, 1H), 3.71 (s, 2H), 3.63 (s, 2H), 2.60 (bs, 8H); <sup>13</sup>C NMR (100.6 MHz) (CDCl<sub>3</sub>): δ = 161.4 (q) (d, *J* = 246 Hz), 155.1 (q), 154.5 (q), 131.7 (CH) (d, *J* = 4 Hz), 128.7 (CH) (d, *J* = 8 Hz), 128.3 (q), 124.5 (q) (d, *J* = 15 Hz), 123.9 (CH), 123.8 (CH) (d, *J* = 3.6 Hz), 122.6 (CH), 120.6 (CH), 115.3 (CH) (d,



$J = 22$  Hz), 111.3 (CH), 105.7 (CH), 55.4 (CH<sub>2</sub>), 55.2 (CH<sub>2</sub>) (d,  $J = 2$  Hz), 53.0 (CH<sub>2</sub>), 52.5 (CH<sub>2</sub>); <sup>19</sup>F NMR (376.5 MHz) (CDCl<sub>3</sub>):  $\delta = -124.5$ ; HRMS:  $m/z$  [M + Na]<sup>+</sup> calcd for C<sub>20</sub>H<sub>21</sub>FN<sub>2</sub>O<sub>2</sub>Na: 347.1530; found: 347.1529.

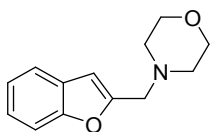

**6ag**: pale yellow solid; 73% yield (63.4 mg); mp: 85-86°C; IR (neat): 2815, 1450, 1291, 1119, 1006, 939 cm<sup>-1</sup>; <sup>1</sup>H NMR (400.13 MHz) (CDCl<sub>3</sub>):  $\delta = 7.55$  (d,  $J = 8.0$  Hz, 1H), 7.51 (d,  $J = 7.0$  Hz, 1H), 7.32-7.19 (m, 2H), 6.63 (s, 1H), 4.63 (bt,  $J = 4.6$  Hz, 4H) 3.70 (s, 2H), 2.57 (bt,  $J = 4$  Hz, 4H); <sup>13</sup>C NMR (100.6 MHz) (CDCl<sub>3</sub>):  $\delta = 155.1$  (q), 154.0 (q), 128.2 (q), 124.0 (CH), 122.7 (CH), 120.7 (CH), 111.3 (CH), 105.9 (CH), 66.8 (CH<sub>2</sub>), 55.9 (CH<sub>2</sub>), 53.5 (CH<sub>2</sub>); HRMS:  $m/z$  [M + H]<sup>+</sup> calcd for C<sub>13</sub>H<sub>16</sub>NO<sub>2</sub>: 218.1176; found: 218.1177.

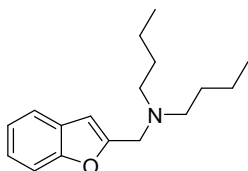

**6ah**: pale yellow oil; 75% yield (77.8 mg); IR (neat): 2956, 2931, 1454, 1384, 1254, 741 cm<sup>-1</sup>; <sup>1</sup>H NMR (400.13 MHz) (DMSO-*d*<sub>6</sub>):  $\delta = 7.60$ -7.56 (m, 1H), 7.55-7.50 (m, 1H), 7.28- 7.16 (m, 2H), 6.72 (s, 1H), 3.74 (s, 2H), 2.43 (bt,  $J = 7.0$  Hz, 4H), 1.48-1.38 (m, 4H), 1.28 (sext,  $J = 7.5$  Hz, 4H), 0.85 (t,  $J = 7.3$ , 6H); <sup>13</sup>C NMR (100.6 MHz) (CDCl<sub>3</sub>):  $\delta = 156.9$  (q), 154.7 (q), 128.6 (q), 124.1 (CH), 123.1 (CH), 121.1 (CH), 111.3 (CH), 105.2 (CH), 53.5 (CH<sub>2</sub>), 50.5 (CH<sub>2</sub>), 29.4 (CH<sub>2</sub>), 20.4 (CH<sub>2</sub>), 14.3 (CH<sub>3</sub>); HRMS:  $m/z$  [M + H]<sup>+</sup> calcd for C<sub>17</sub>H<sub>26</sub>NO: 260.2009; found: 260.2008.

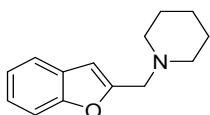

**6ai**: brown wax; 92% yield (79.2 mg); IR (neat): 2934, 1454, 1384, 1256, 1102, 741 cm<sup>-1</sup>; <sup>1</sup>H NMR (400.13 MHz) (CDCl<sub>3</sub>):  $\delta = 7.56$ -7.47 (m, 2H), 7.29- 7.19 (m, 2H), 6.59 (s, 1H), 3.67 (s, 2H), 2.22-2.45 (m, 4H), 1.64 (quint,  $J = 5.4$  Hz, 4H), 1.49-1.41 (m, 2H); <sup>13</sup>C NMR (100.6 MHz) (CDCl<sub>3</sub>):  $\delta = 155.1$  (q) (overlapping), 128.4 (q), 123.7 (CH), 122.6 (CH), 120.6 (CH), 111.3 (CH), 105.4 (CH), 56.2 (CH<sub>2</sub>), 54.4 (CH<sub>2</sub>), 25.8 (CH<sub>2</sub>), 24.1 (CH<sub>2</sub>); HRMS:  $m/z$  [M + H]<sup>+</sup> calcd for C<sub>14</sub>H<sub>18</sub>NO: 216.1383; found: 216.1387.

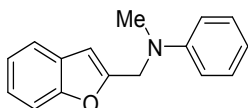

**6aj**: yellow wax; 48% yield (45.6 mg); mp: IR (neat): 2917, 1600, 1505, 1454, 1383, 1253 cm<sup>-1</sup>; <sup>1</sup>H NMR (400.13 MHz) (CDCl<sub>3</sub>):  $\delta = 7.52$ -7.54 (m, 2H), 7.31-7.24 (m, 3H), 7.21 (td,  $J_1 = 7.5$  Hz,  $J_2 = 1.1$  Hz, 1H), 6.88 (d,  $J = 7.9$  Hz, 2H), 6.79 (t,  $J = 7.9$  Hz, 1H), 6.53 (d,  $J = 0.8$  Hz, 1H), 4.65 (s, 2H), 3.12 (s, 3H); <sup>13</sup>C NMR (100.6 MHz) (CDCl<sub>3</sub>):  $\delta = 155.2$  (q), 154.9 (q), 149.1 (q), 129.2 (CH), 128.4 (q), 123.8 (CH), 122.7 (CH), 120.7 (CH), 117.3 (CH), 112.9 (CH), 111.1 (CH), 103.9 (CH), 50.5 (CH<sub>2</sub>), 38.7 (CH<sub>3</sub>); HRMS:  $m/z$  [M + H]<sup>+</sup> calcd for C<sub>16</sub>H<sub>16</sub>NO: 238.1226; found: 238.1232.

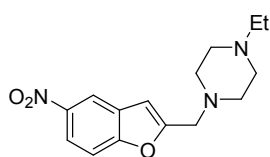

**6ba**: pale yellow solid; 84% yield (97.2 mg); mp: 89-90°C; IR (neat): 2941, 1520, 1453, 1343, 1265, 1158, 1008  $\text{cm}^{-1}$ ;  $^1\text{H}$  NMR (400.13 MHz) ( $\text{CDCl}_3$ ):  $\delta$  = 8.46 (d,  $J$  = 2.3 Hz, 1H), 8.19 (dd,  $J_1$  = 9.0 Hz,  $J_2$  = 2.4 Hz, 1H), 7.54 (d,  $J$  = 9.0 Hz, 1H), 6.76 (d,  $J$  = 0.3 Hz, 1H), 3.76 (s, 2H), 2.76-2.48 (m, 8H), 2.44 (q,  $J$  = 7.2 Hz, 2H), 1.09 (t,  $J$  = 7.2 Hz, 3H);  $^{13}\text{C}$  NMR (100.6 MHz) ( $\text{CDCl}_3$ ):  $\delta$  = 158.3 (q), 157.9(q), 144.1(q), 128.7 (q), 119.9 (CH), 117.2 (CH), 111.6 (CH), 106.3 (CH), 55.2 ( $\text{CH}_2$ ), 53.1 ( $\text{CH}_2$ ), 52.5 ( $\text{CH}_2$ ), 52.2 ( $\text{CH}_2$ ), 11.9 ( $\text{CH}_3$ ); HRMS:  $m/z$  [ $\text{M} + \text{H}$ ] $^+$  calcd for  $\text{C}_{15}\text{H}_{20}\text{N}_3\text{O}_3$ : 290.1499; found: 290.1504.

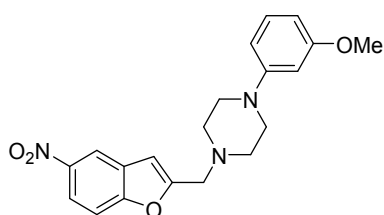

**6bk**: pale yellow solid; 84% yield (123.4 mg); mp: 106-107°C; IR (neat): 1732, 1518, 1446, 1341, 815  $\text{cm}^{-1}$ ;  $^1\text{H}$  NMR (400.13 MHz) ( $\text{CDCl}_3$ ):  $\delta$  = 8.50 (d,  $J$  = 2.3 Hz, 1H), 8.23 (dd,  $J_1$  = 9.1 Hz,  $J_2$  = 2.3 Hz, 1H), 7.58 (d,  $J$  = 9.0 Hz, 1H), 7.19 (t,  $J$  = 8.2 Hz, 1H), 6.82 (s, 1H), 6.56 (dd,  $J_1$  = 8.3 Hz,  $J_2$  = 1.8 Hz, 1H), 6.48 (t,  $J$  = 2.3 Hz, 1H), 6.45 (dd,  $J_1$  = 8.0 Hz,  $J_2$  = 2.2 Hz, 1H), 3.82 (s, 2H), 3.81 (s, 3H), 3.31-3.24 (m, 4H), 2.78-2.72 (m, 4H);  $^{13}\text{C}$  NMR (100.6 MHz) ( $\text{CDCl}_3$ ):  $\delta$  = 160.6 (q), 158.1 (q), 157.9 (q), 152.5 (q), 144.2 (q), 129.8 (CH), 128.7 (q), 120.0 (CH), 117.3 (CH), 111.6 (CH), 109.0 (CH), 106.4 (CH), 104.6 (CH), 102.7 (CH), 55.3 ( $\text{CH}_2$ ), 55.2 ( $\text{CH}_3$ ), 53.1 ( $\text{CH}_2$ ), 49.0 ( $\text{CH}_2$ ); HRMS:  $m/z$  [ $\text{M} + \text{H}$ ] $^+$  calcd for  $\text{C}_{20}\text{H}_{22}\text{N}_3\text{O}_4$ : 368.1605; found: 368.1612.

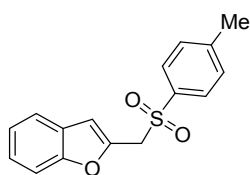

**8aa**: pale yellow solid; 98% yield (112.2 mg); mp: 194-195°C; IR (neat): 1451, 1310, 1144, 1084  $\text{cm}^{-1}$ ;  $^1\text{H}$  NMR (400.13 MHz) ( $\text{CDCl}_3$ ):  $\delta$  = 7.57 (d,  $J$  = 8.1 Hz, 2H), 7.45(d,  $J$  = 7.7 Hz, 1H), 7.28 (d,  $J$  = 8.1 Hz, 1H), 7.23-7.11 (m, 4H), 6.59 (s, 1H), 4.45 (s, 2H), 2.35 (s, 3H);  $^{13}\text{C}$  NMR (100.6 MHz) ( $\text{CDCl}_3$ ):  $\delta$  = 155.2 (q), 145.3 (q), 145.1 (q), 135.3 (q), 129.8 (CH), 128.5 (CH), 127.9 (q), 124.9 (CH), 123.1 (CH), 121.2 (CH), 111.3 (CH), 108.9 (CH), 56.5 ( $\text{CH}_2$ ), 21.7 ( $\text{CH}_3$ ); HRMS:  $m/z$  [ $\text{M} + \text{Na}$ ] $^+$  calcd for  $\text{C}_{16}\text{H}_{14}\text{O}_3\text{SNa}$ : 309.0556; found: 309.0551.

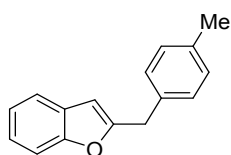

**8'aa**: pale yellow oil; IR (neat): 2917, 1457, 954, 750  $\text{cm}^{-1}$ ;  $^1\text{H}$  NMR (400.13 MHz) ( $\text{CDCl}_3$ ) (selected signals):  $\delta$  = 7.50-7.39 (m, 2H), 7.26-7.13 (m, 6H), 6.38 (d,  $J$  = 0.7 Hz, 1H), 4.09 (s, 2H), 2.37 (s, 3H);  $^{13}\text{C}$  NMR (100.6 MHz)

(CDCl<sub>3</sub>):  $\delta$  = 158.1 (q), 155.0 (q), 136.3 (q), 134.1 (q), 129.3 (CH), 128.8 (CH) (overlapping), 123.3 (CH), 122.5 (CH), 120.4 (CH), 110.9 (q), 103.2 (CH), 34.6 (CH<sub>2</sub>), 21.1 (CH<sub>3</sub>); HRMS:  $m/z$  [M + Na]<sup>+</sup> calcd for C<sub>16</sub>H<sub>14</sub>ONa: 245.0937; found: 245.0938.

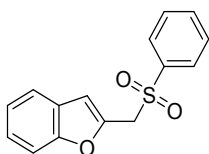

**8ab**: white solid; 89% yield (96.9 mg); mp: 165-166°C; IR (neat): 1445, 1306, 1147, 1081 cm<sup>-1</sup>; <sup>1</sup>H NMR (400.13 MHz) (CDCl<sub>3</sub>):  $\delta$  = 7.79 (d,  $J$  = 7.5 Hz, 2H), 7.66 (t,  $J$  = 7.5 Hz, 1H), 7.57-7.49 (m, 3H), 7.37 (d,  $J$  = 8.1 Hz, 1H), 7.33-7.21 (m, 2H), 6.70 (s, 1H), 4.58 (s, 2H); <sup>13</sup>C NMR (100.6 MHz) (CDCl<sub>3</sub>):  $\delta$  = 155.2 (q), 145.0 (q), 138.2 (q), 134.1 (CH), 129.1 (CH), 128.5 (CH), 127.9 (q), 125.0 (CH), 123.1 (CH), 121.2 (CH), 111.3 (CH), 109.0 (CH), 56.5 (CH<sub>2</sub>); HRMS:  $m/z$  [M + Na]<sup>+</sup> calcd for C<sub>15</sub>H<sub>12</sub>O<sub>3</sub>SNa: 295.0399; found: 295.0399.

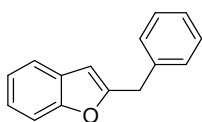

**8'ab**: yellow oil; 5% yield (4.1 mg); IR (neat): 2922, 2854, 1454, 1252 cm<sup>-1</sup>; <sup>1</sup>H NMR (400.13 MHz) (CDCl<sub>3</sub>):  $\delta$  = 7.42-7.37 (m, 1H), 7.33 (d,  $J$ =8.0 Hz, 1H), 7.28-7.21 (m, 4H), 7.28-7.22 (m, 4H), 7.21-7.06 (m, 3H), 6.29 (d,  $J$  = 0.6 Hz, 1H), 4.03 (s, 2H), 2.35 (s, 3H); <sup>13</sup>C NMR (100.6 MHz) (CDCl<sub>3</sub>):  $\delta$  = 157.8 (q), 155.0 (q), 137.2 (q), 128.9 (CH), 128.8 (q), 128.6 (CH), 126.8 (CH), 123.4 (CH), 122.5 (CH), 120.4, 110.9. (CH), 103.4 (CH), 35.0 (CH<sub>2</sub>); HRMS:  $m/z$  [M + Na]<sup>+</sup> calcd for C<sub>15</sub>H<sub>12</sub>ONa: 231.0780; found: 231.0783.

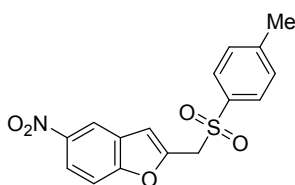

**8ba**: pale orange solid; 84% yield (111.3 mg); mp: 174-175°C; IR (neat): 1515, 1343, 1323, 1152, 1082 cm<sup>-1</sup>; <sup>1</sup>H NMR (400.13 MHz) (CDCl<sub>3</sub>):  $\delta$  = 8.47 (d,  $J$  = 2.3 Hz, 1H), 8.22 (dd,  $J_1$  = 9.1 Hz,  $J_2$  = 2.3 Hz, 1H), 7.67 (d,  $J$  = 8.2 Hz, 2H), 7.48 (d,  $J$  = 9.1 Hz, 1H), 7.30 (d,  $J$  = 8.2 Hz, 2H), 6.81 (d,  $J$  = 0.3 Hz, 1H), 4.57 (s, 2H), 2.45 (s, 3H); <sup>13</sup>C NMR (100.6 MHz) (CDCl<sub>3</sub>):  $\delta$  = 157.8 (q), 149.0 (q), 145.6 (q), 144.4 (q), 135.0 (q), 130.0 (CH), 128.5 (CH), 128.2 (q), 120.8 (CH), 117.8 (CH), 111.8 (CH), 109.5 (CH), 56.2 (CH<sub>2</sub>), 21.7 (CH<sub>3</sub>); HRMS:  $m/z$  [M + Na]<sup>+</sup> calcd for C<sub>16</sub>H<sub>13</sub>NO<sub>5</sub>SNa: 354.0407; found: 354.040.

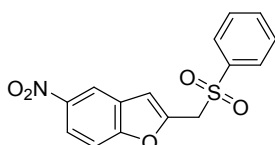

**8bb**: pale yellow solid; 84% yield (106.6 mg); mp: 214-215°C; IR (neat): 1516, 1346, 1298, 1266, 1148, 1066, 821 cm<sup>-1</sup>; <sup>1</sup>H NMR (400.13 MHz) (CDCl<sub>3</sub>):  $\delta$  = 8.49 (d,  $J$  = 2.3 Hz, 1H), 8.24 (dd,  $J_1$  = 9.1 Hz,  $J_2$  = 2.3 Hz, 1H), 7.84-7.79 (m, 2H), 7.72-7.66 (m, 1H), 7.54 (d,  $J$  = 7.8 Hz, 2H), 7.48 (d,  $J$  = 9.1 Hz, 1H), 6.84 (s, 1H), 4.61 (s, 2H); <sup>13</sup>C

NMR (100.6 MHz) (CDCl<sub>3</sub>):  $\delta$  = 157.8 (q), 148.8 (q), 144.5 (q), 137.9 (q), 134.4 (CH), 129.4 (CH), 128.4 (CH), 128.2 (q), 120.9 (CH), 117.9 (CH), 111.8 (CH), 109.6 (CH), 56.2 (CH<sub>2</sub>); HRMS:  $m/z$  [M + Na]<sup>+</sup> calcd for C<sub>15</sub>H<sub>11</sub>NO<sub>5</sub>Na: 340.0250; found: 340.0246.

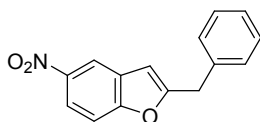

**8'bb**: pale yellow gum; 9% yield (9.1 mg); IR (neat): 2923, 2853, 1517, 1341, 1262 cm<sup>-1</sup>; <sup>1</sup>H NMR (400.13 MHz) (CDCl<sub>3</sub>):  $\delta$  = 8.42 (d,  $J$  = 2.4 Hz, 1H), 8.18 (dd,  $J_1$  = 9.1,  $J_2$  = 2.4 Hz, 1H), 7.50 (d,  $J$  = 9.1 Hz, 1H), 7.41–7.30 (m, 5H), 6.53 (d,  $J$  = 0.9 Hz, 1H), 4.17 (s, 2H); <sup>13</sup>C NMR (100.6 MHz) (CDCl<sub>3</sub>):  $\delta$  = 161.5 (q), 157.8 (q), 144.1 (q), 136.1 (q), 129.2 (q), 128.9 (CH), 128.8 (CH), 127.2 (CH), 119.5 (CH), 116.9 (CH), 111.2 (CH), 104.1 (CH), 35.0 (CH<sub>2</sub>), 29.7 (CH<sub>3</sub>); HRMS:  $m/z$  [M + Na]<sup>+</sup> calcd for C<sub>15</sub>H<sub>11</sub>NO<sub>3</sub>Na: 276.0631; found: 276.0628.

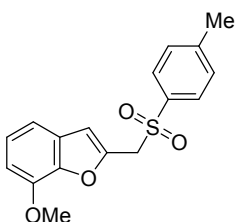

**8ca**: pale yellow oil; 84% yield (106.3 mg); IR (neat): 2929, 2840, 1492, 1286, 1148, 1084 cm<sup>-1</sup>; <sup>1</sup>H NMR (400.13 MHz) (CDCl<sub>3</sub>):  $\delta$  = 7.68 (d,  $J$  = 8.2 Hz, 2H), 7.31–7.26 (m, 2H), 7.20–7.13 (m, 2H), 6.80 (dd,  $J_1$  = 6.5 Hz,  $J_2$  = 2.4 Hz, 1H), 6.75 (s, 1H), 4.57 (s, 2H), 3.95 (s, 3H), 2.45 (s, 3H); <sup>13</sup>C NMR (100.6 MHz) (CDCl<sub>3</sub>):  $\delta$  = 145.4 (q), 145.2 (q), 145.1 (q), 144.6 (q), 135.4 (q), 129.8 (CH), 129.7 (q), 128.6 (CH), 123.8 (CH), 113.5 (CH), 109.0 (CH), 107.2 (CH), 56.3 (CH<sub>2</sub>), 56.1 (CH<sub>3</sub>), 21.6 (CH<sub>3</sub>); HRMS:  $m/z$  [M + Na]<sup>+</sup> calcd for C<sub>17</sub>H<sub>16</sub>O<sub>4</sub>Na: 339.0662; found: 339.0655.

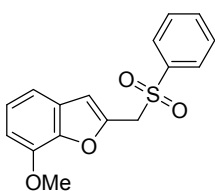

**8cb**: pale yellow oil; 91% yield (110.0 mg); IR (neat): 2931, 2841, 1483, 1285, 1149, 1083 cm<sup>-1</sup>; <sup>1</sup>H NMR (400.13 MHz) (CDCl<sub>3</sub>):  $\delta$  = 7.84–7.78 (m, 2H), 7.65 (t,  $J$  = 7.5 Hz, 1H), 7.51 (t,  $J$  = 7.9 Hz, 2H), 7.20–7.12 (m, 2H), 6.80 (dd,  $J_1$  = 6.7 Hz,  $J_2$  = 2.1 Hz, 1H), 6.75 (s, 1H), 4.60 (s, 2H), 3.94 (s, 3H); <sup>13</sup>C NMR (100.6 MHz) (CDCl<sub>3</sub>):  $\delta$  = 145.4 (q), 145.3 (q), 144.7 (q), 138.4 (q), 134.1 (CH), 129.8 (q), 129.3 (CH), 128.7 (CH), 124.0 (CH), 113.6 (CH), 109.3 (CH), 107.4 (CH), 56.4 (CH<sub>2</sub>), 56.2 (CH<sub>3</sub>); HRMS:  $m/z$  [M + Na]<sup>+</sup> calcd for C<sub>16</sub>H<sub>14</sub>O<sub>4</sub>Na: 325.0505; found: 325.0501.

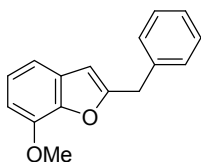

**8'cb**: pale yellow oil; 6% yield (5.7 mg); IR (neat): 2928, 1629, 1492, 1149, 1105  $\text{cm}^{-1}$ ;  $^1\text{H}$  NMR (400.13 MHz) ( $\text{CDCl}_3$ ):  $\delta$  = 7.38-7.30 (m, 4H), 7.30-7.25 (m, 1H), 7.16-7.01 (m, 2H), 6.76 (dd,  $J_1$  = 7.6 Hz,  $J_2$  = 1.2 Hz, 1H), 6.34 (s, 1H), 4.16 (s, 2H), 4.01 (s, 3H);  $^{13}\text{C}$  NMR (100.6 MHz) ( $\text{CDCl}_3$ ):  $\delta$  = 158.1 (q), 145.0 (q), 144.0 (q), 137.1 (q), 130.5 (q), 129.0 (CH), 128.6 (CH), 126.7 (CH), 123.2 (CH), 112.9 (CH), 105.7 (CH), 103.7 (CH), 56.0 ( $\text{CH}_2$ ), 35.9 ( $\text{CH}_3$ ); HRMS:  $m/z$  [ $\text{M} + \text{Na}$ ] $^+$  calcd for  $\text{C}_{16}\text{H}_{14}\text{O}_2\text{Na}$ : 261.0886; found: 261.0886.

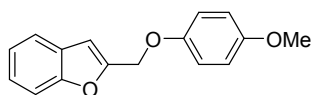

**10aa**: white solid; 90% yield (91.5 mg); mp: 92-93  $^\circ\text{C}$ ; IR (neat): 2926, 1505, 1453, 1376, 1225, 1030  $\text{cm}^{-1}$ ;  $^1\text{H}$  NMR (400.13 MHz) ( $\text{CDCl}_3$ ):  $\delta$  = 7.59 (d,  $J$  = 7.6 Hz, 1H), 7.53 (d,  $J$  = 8.2 Hz, 1H), 7.35-7.30 (m, 1H), 7.28-7.23 (m, 1H), 6.98 (d,  $J$  = 9.1 Hz, 2H), 6.88 (d,  $J$  = 9.1 Hz, 2H), 6.79 (s, 1H), 5.14 (s, 2H), 3.80 (s, 3H);  $^{13}\text{C}$  NMR (100.6 MHz) ( $\text{CDCl}_3$ ):  $\delta$  = 155.2 (q), 154.4 (q), 153.2 (q), 152.4 (q), 128.0 (q), 124.6 (CH), 122.9 (CH), 121.2 (CH), 116.2 (CH), 114.7 (CH), 111.4 (CH), 106.0 (CH), 64.0 ( $\text{CH}_2$ ), 55.7 ( $\text{CH}_3$ ); HRMS:  $m/z$  [ $\text{M} + \text{Na}$ ] $^+$  calcd for  $\text{C}_{16}\text{H}_{14}\text{O}_3\text{Na}$ : 277.0835; found: 277.0833.

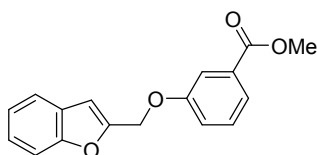

**10ab**: beige solid; 92% yield (103.9 mg); mp: 70-71  $^\circ\text{C}$ ; IR (neat): 1717, 1591, 1220, 1101, 1073, 1015  $\text{cm}^{-1}$ ;  $^1\text{H}$  NMR (400.13 MHz) ( $\text{CDCl}_3$ ):  $\delta$  = 7.76-7.68 (m, 2H), 7.59 (d,  $J$  = 7.8 Hz, 1H), 7.53 (d,  $J$  = 8.1 Hz, 1H), 7.39 (t,  $J$  = 8.1 Hz, 1H), 7.36-7.30 (m, 1H), 7.17-7.11 (m, 2H), 6.72 (s, 1H), 5.24 (s, 2H), 3.94 (s, 3H);  $^{13}\text{C}$  NMR (100.6 MHz) ( $\text{CDCl}_3$ ):  $\delta$  = 166.8 (q), 158.2 (q), 155.3 (q), 152.3 (q), 131.6 (q), 129.6 (CH), 127.9 (q), 124.7 (CH), 123.0 (CH), 122.8 (CH), 121.3 (CH), 120.4 (CH), 115.1 (CH), 111.4 (CH), 106.5 (CH), 63.2 ( $\text{CH}_2$ ), 52.2 ( $\text{CH}_3$ ); HRMS:  $m/z$  [ $\text{M} + \text{Na}$ ] $^+$  calcd for  $\text{C}_{17}\text{H}_{14}\text{O}_4\text{Na}$ : 305.0784; found: 305.0782.

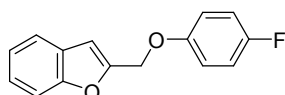

**10ac**: yellow solid; 98% yield (95.0 mg); mp: 90-91  $^\circ\text{C}$ ; IR (neat): 2930, 1602, 1506, 1453, 1226, 1173, 1093  $\text{cm}^{-1}$ ;  $^1\text{H}$  NMR (400.13 MHz) ( $\text{CDCl}_3$ ):  $\delta$  = 7.57 (d,  $J$  = 7.2 Hz, 1H), 7.50 (d,  $J$  = 8.2 Hz, 1H), 7.33-7.21 (m, 2H), 7.03-6.93 (m, 4H), 6.78 (s, 1H), 5.13 (s, 2H);  $^{13}\text{C}$  NMR (100.6 MHz) ( $\text{CDCl}_3$ ):  $\delta$  = 157.7 (d,  $J$  = 239.2 Hz) (q), 155.2 (q), 154.4 (d,  $J$  = 2.10 Hz) (q), 152.7 (q), 127.9 (q), 124.7 (CH), 123.0 (CH), 121.2 (CH), 116.2 (CH,  $J$  = 8.0 Hz), 115.9 (CH,  $J$  = 23.0 Hz), 111.4 (CH), 106.3 (CH), 63.9 ( $\text{CH}_2$ );  $^{19}\text{F}$  NMR (376.5 MHz) ( $\text{CDCl}_3$ ):  $\delta$  = (-122.879) - (-122.946) HRMS:  $m/z$  [ $\text{M} + \text{Na}$ ] $^+$  calcd for  $\text{C}_{15}\text{H}_{11}\text{FO}_2\text{Na}$ : 265.0635; found: 265.0638.

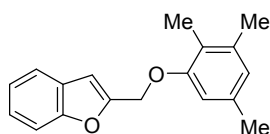

**10ad**: white solid; 75% yield (79.9 mg); mp: 85-86  $^\circ\text{C}$ ; IR (neat): 2923, 1754, 1453, 1384, 1255, 1208, 1098  $\text{cm}^{-1}$ ;  $^1\text{H}$  NMR (400.13 MHz) ( $\text{CDCl}_3$ ):  $\delta$  = 7.60 (d,  $J$  = 7.5 Hz, 1H), 7.53 (d,  $J$  = 8.0 Hz, 1H), 7.36-7.23 (m, 2H), 6.79

(s, 1H), 6.70 (s, 2H), 5.16 (s, 2H), 2.33 (s, 3H), 2.27 (s, 3H), 2.17 (s, 3H);  $^{13}\text{C}$  NMR (100.6 MHz) ( $\text{CDCl}_3$ ):  $\delta$  = 156.3 (q), 155.1 (q), 153.7 (q), 137.9 (q), 135.5 (q), 128.2 (q), 124.4 (CH), 123.9 (CH), 122.8 (CH), 122.7 (q), 121.1 (CH), 111.4 (CH), 110.9 (CH), 105.5 (CH), 63.8 ( $\text{CH}_2$ ), 21.3 ( $\text{CH}_3$ ), 20.0 ( $\text{CH}_3$ ), 11.4 ( $\text{CH}_3$ ); HRMS:  $m/z$  [ $\text{M} + \text{Na}$ ] $^+$  calcd for  $\text{C}_{18}\text{H}_{18}\text{O}_2\text{Na}$ : 289.1199; found: 289.1198.

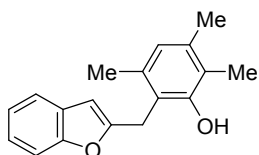

**11a**: white solid; 6% yield (6.4 mg); mp: 120-121°C; IR (neat): 3390, 2923, 1454, 1160  $\text{cm}^{-1}$ ;  $^1\text{H}$  NMR (400.13 MHz) ( $\text{CDCl}_3$ ):  $\delta$  = 7.48-7.40 (m, 2H), 7.25-7.14 (m, 2H), 6.69 (s, 1H), 6.31 (d,  $J$  = 0.8 Hz, 1H), 5.08 (s, 1H), 4.14 (s, 2H), 2.35 (s, 3H), 2.27 (s, 3H), 2.19 (s, 3H);  $^{13}\text{C}$  NMR (100.6 MHz) ( $\text{CDCl}_3$ ):  $\delta$  = 157.1 (q), 154.8 (q), 152.2 (q), 136.1 (q), 134.6 (q), 128.8 (q), 124.3 (CH), 123.4 (CH), 122.6 (CH), 120.32 (CH), 120.26 (q), 119.5 (q), 110.9 (CH), 102.5 (CH), 26.1 ( $\text{CH}_2$ ), 20.0 ( $\text{CH}_3$ ), 19.4 ( $\text{CH}_3$ ), 11.7 ( $\text{CH}_3$ ); HRMS:  $m/z$  [ $\text{M} + \text{H}$ ] $^+$  calcd for  $\text{C}_{18}\text{H}_{19}\text{O}_2$ : 267.1380; found: 267.1377.

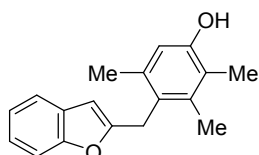

**11b**: pale yellow oil; 8% yield (8.5 mg); IR (neat): 3388, 2935, 1440, 1161  $\text{cm}^{-1}$ ;  $^1\text{H}$  NMR (400.13 MHz) ( $\text{CDCl}_3$ ) (selected signals) :  $\delta$  = 7.42 (d, 1H,  $J$  = 8.1 Hz), 7.25-7.12 (m, 3H), 6.57 (s, 1H), 6.07 (d, 1H,  $J$  = 0.8 Hz), 4.65 (s, 1H), 4.10 (s, 2H), 2.31 (s, 3H), 2.27 (s, 3H), 2.11 (s, 3H);  $^{13}\text{C}$  NMR (100.6 MHz) ( $\text{CDCl}_3$ ) (selected signals) :  $\delta$  = 158.0 (q), 154.9 (q), 152.1 (q), 137.3(q), 135.2(q), 128.9(q), 126.0(q), 123.1 (CH), 122.4 (CH), 120.3 (q), 120.2 (CH), 114.6 (CH), 110.8 (CH), 102.5 (CH), 29.0 ( $\text{CH}_2$ ), 20.1 ( $\text{CH}_3$ ), 16.1 ( $\text{CH}_3$ ), 12.0 ( $\text{CH}_3$ ); HRMS:  $m/z$  [ $\text{M} + \text{H}$ ] $^+$  calcd for  $\text{C}_{18}\text{H}_{19}\text{O}_2$ : 267.1380; found: 267.1378.

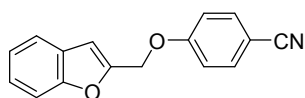

**10ae**: pale yellow solid; 84% yield (83.7 mg); mp: 103-104°C; IR (neat): 2923, 2219, 1602, 1451, 1243, 1172, 1000  $\text{cm}^{-1}$ ;  $^1\text{H}$  NMR (400.13 MHz) ( $\text{CDCl}_3$ ):  $\delta$  = 7.67-7.58 (m, 3H), 7.52 (d,  $J$  = 8.1 Hz, 1 H), 7.38-7.32 (m, 1H), 7.10 (d,  $J$  = 8.9 Hz, 1H), 6.84 (s, 1H), 5.24 (s, 2H);  $^{13}\text{C}$  NMR (100.6 MHz) ( $\text{CDCl}_3$ ):  $\delta$  = 161.4 (q), 155.3 (q), 151.4 (q), 134.1 (CH), 127.7 (q), 125.0 (CH), 123.1 (CH), 122.7 (q), 121.4 (CH), 119.0 (q), 115.6 (CH), 111.5 (CH), 106.9 (CH), 104.8 (q), 63.1 ( $\text{CH}_2$ ); HRMS:  $m/z$  [ $\text{M} + \text{Na}$ ] $^+$  calcd for  $\text{C}_{16}\text{H}_{11}\text{NO}_2\text{Na}$ : 272.0682; found: 272.0683.

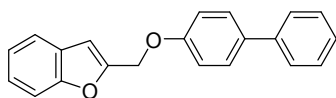

**10af**: white solid; 87% yield (104.5 mg); mp: 147-148°C; IR (neat): 1722, 1592, 1488, 1223, 1102, 1074  $\text{cm}^{-1}$ ;  $^1\text{H}$  NMR (400.13 MHz) ( $\text{DMSO}-d_6$ ):  $\delta$  = 7.67 (d, 1H,  $J$  = 7.5 Hz), 7.65-7.58 (m, 5H), 7.44 (t,  $J$  = 7.8 Hz, 2H), 7.37-7.22 (m, 3H), 7.18 (d,  $J$  = 8.6 Hz, 2H), 7.09 (bs, 1H), 5.33 (s, 2H);  $^{13}\text{C}$  NMR (100.6 MHz) ( $\text{DMSO}-d_6$ ):  $\delta$  = 157.9

(q), 155.0 (q), 153.5 (q), 140.2 (q), 133.6 (q), 129.3 (CH), 128.3 (CH), 128.1 (q), 127.3 (CH), 126.7 (CH), 125.2 (CH), 123.5 (CH), 121.9 (CH), 115.8 (CH), 111.7 (CH), 107.2 (CH), 62.7 (CH<sub>2</sub>); HRMS:  $m/z$  [M + Na]<sup>+</sup> calcd for C<sub>21</sub>H<sub>16</sub>O<sub>2</sub>Na: 323.104; found: 323.1045.

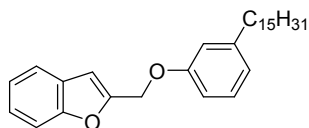

**10ag**: white solid; 82% yield (142.6 mg); mp: 59-60°C; IR (neat): 1915, 2847, 1593, 1464, 1257, 1023 cm<sup>-1</sup>; <sup>1</sup>H NMR (400.13 MHz) (CDCl<sub>3</sub>): δ = 7.61-7.56 (m, 1H), 7.54-7.50 (m, 1H), 7.34-7.29 (m, 1H), 7.27-7.19 (m, 2H), 6.89-6.82 (m, 3H), 6.80 (s, 1H), 5.18 (s, 2H), 2.60 (t,  $J$  = 7.6 Hz, 2H), 1.68-1.58 (m, 2H), 1.38-1.24 (m, 26H), 0.91 (t,  $J$  = 6.8 Hz, 3H); <sup>13</sup>C NMR (100.6 MHz) (CDCl<sub>3</sub>): δ = 158.3 (q), 155.2 (q), 153.1 (q), 144.8 (q), 129.2 (CH), 128.1 (q), 124.5 (CH), 122.9 (CH), 121.7 (CH), 121.2 (CH), 115.3 (CH), 111.7 (CH), 111.4 (CH), 106.0 (CH), 63.0 (CH<sub>2</sub>), 36.0 (CH<sub>2</sub>), 31.9 (CH<sub>2</sub>), 31.3 (CH<sub>2</sub>), 29.71 (CH<sub>2</sub>), 29.69 (CH<sub>2</sub>), 29.67 (CH<sub>2</sub>), 29.60 (CH<sub>2</sub>), 29.5 (CH<sub>2</sub>), 29.4 (CH<sub>2</sub>), 29.3 (CH<sub>2</sub>), 22.7 (CH<sub>2</sub>), 14.1 (CH<sub>3</sub>); HRMS:  $m/z$  [M + Na]<sup>+</sup> calcd for C<sub>30</sub>H<sub>42</sub>O<sub>2</sub>Na: 457.3077; found: 457.3080.

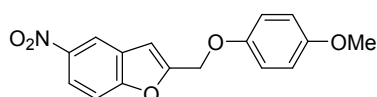

**10ba**: pale yellow solid; 87% yield (104.2 mg); mp: 110-111°C; IR (neat): 1506, 1340, 1225, 1034 cm<sup>-1</sup>; <sup>1</sup>H NMR (400.13 MHz) (CDCl<sub>3</sub>): δ = 8.52 (d,  $J$  = 2.3 Hz, 1H), 8.26 (dd,  $J_1$  = 9.0 Hz,  $J_2$  = 2.3 Hz, 1H), 7.60 (d,  $J$  = 9.0 Hz, 1H), 6.98 (d,  $J$  = 9.1 Hz, 2H), 6.94-6.91 (m, 1H), 6.88 (d,  $J$  = 9.1 Hz, 2H), 6.80 (d,  $J$  = 2.7 Hz, 1H), 5.07 (s, 2H), 3.71 (s, 3H); <sup>13</sup>C NMR (100.6 MHz) (CDCl<sub>3</sub>): δ = 157.9 (q), 156.8 (q), 154.7 (q), 152.1 (q), 144.3 (q), 128.4 (q), 120.5 (CH), 117.8 (CH), 116.2 (CH), 114.8 (CH), 111.8 (CH), 106.5 (CH), 63.7 (CH<sub>2</sub>), 55.7 (CH<sub>3</sub>); HRMS:  $m/z$  [M + Na]<sup>+</sup> calcd for C<sub>16</sub>H<sub>13</sub>NO<sub>5</sub>Na: 322.0686; found: 322.0685.

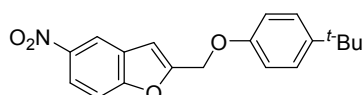

**10bh**: pale yellow solid; 93% yield (121.0 mg); mp: 98-99°C; IR (neat): 2924, 1509, 1342, 1230, 1019 cm<sup>-1</sup>; <sup>1</sup>H NMR (400.13 MHz) (CDCl<sub>3</sub>): δ = 8.52 (d,  $J$  = 2.3 Hz, 1H), 8.25 (dd,  $J_1$  = 9.0 Hz,  $J_2$  = 2.4 Hz, 1H), 7.59 (d,  $J$  = 9.1 Hz, 1H), 7.40-7.34 (m, 2H), 7.01-6.93 (m, 3H), 5.21 (s, 2H), 1.34 (s, 9H); <sup>13</sup>C NMR (100.6 MHz) (CDCl<sub>3</sub>): δ = 157.9 (q), 156.8 (q), 155.7 (q), 144.6 (q), 144.3 (q), 128.5 (q), 126.5 (CH), 120.4 (CH), 117.7 (CH), 114.3 (CH), 111.8 (CH), 106.5 (CH), 62.8 (CH<sub>2</sub>), 34.2 (q), 31.5 (CH<sub>3</sub>); HRMS:  $m/z$  [M + Na]<sup>+</sup> calcd for C<sub>19</sub>H<sub>19</sub>NO<sub>4</sub>Na: 348.1206; found: 348.1208.

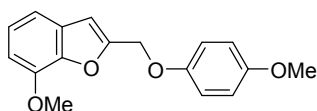

**10ca**: white solid; 90% yield (102.3 mg); mp: 101-102°C; IR (neat): 2930, 1506, 1283, 1226, 1173, 1093 cm<sup>-1</sup>; <sup>1</sup>H NMR (400.13 MHz) (CDCl<sub>3</sub>): δ = 7.20-7.16 (m, 2H), 6.97-6.95 (m, 2H), 6.89-6.80 (m, 3H), 6.77 (s, 1H), 5.15 (s, 2H), 4.04 (s, 3H), 3.79 (s, 3H); <sup>13</sup>C NMR (100.6 MHz) (CDCl<sub>3</sub>): δ = 154.3 (q), 153.4 (q), 152.4 (q), 145.4 (q), 144.4 (q), 129.7 (q), 123.6 (CH), 116.1 (CH), 114.6 (CH), 113.5 (CH), 106.6 (CH), 106.2 (CH), 63.8 (CH<sub>2</sub>), 56.0 (CH<sub>3</sub>), 55.7 (CH<sub>3</sub>); HRMS:  $m/z$  [M + Na]<sup>+</sup> calcd for C<sub>17</sub>H<sub>16</sub>O<sub>4</sub>Na: 307.0941; found: 307.0941.

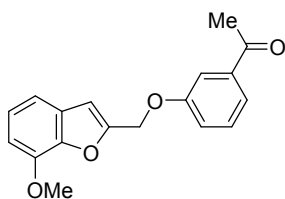

**10ci**: yellow wax; 85% yield (100.7 mg); IR (neat): 2941, 1682, 1583, 1493, 1264, 1199, 1016  $\text{cm}^{-1}$ ;  $^1\text{H}$  NMR (400.13 MHz) ( $\text{CDCl}_3$ ):  $\delta$  = 7.65-7.62 (m, 1H), 7.60 (d, 1H,  $J$  = 7.7 Hz), 7.40 (t, 1H,  $J$  = 8.0 Hz), 7.24-7.16 (m, 3H), 6.85-6.83 (m, 2H), 5.25 (s, 2H), 4.04 (s, 3H), 2.62 (s, 3H);  $^{13}\text{C}$  NMR (100.6 MHz) ( $\text{CDCl}_3$ ):  $\delta$  = 197.8 (q), 158.4 (q), 152.5 (q), 145.4 (q), 144.5 (q), 138.5 (q), 129.7 (CH), 129.6 (q), 123.7 (CH), 121.7 (CH), 120.4 (CH), 113.61 (CH), 113.57 (CH), 106.83 (CH), 106.76 (CH), 63.0 ( $\text{CH}_2$ ), 56.0 ( $\text{CH}_3$ ), 26.7 ( $\text{CH}_3$ ); HRMS:  $m/z$  [ $\text{M} + \text{Na}$ ] $^+$  calcd for  $\text{C}_{18}\text{H}_{16}\text{O}_4\text{Na}$ : 319.0941; found: 319.0937.

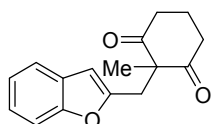

**13aa**: pale yellow oil; 87% yield (89.3 mg); IR (neat): 2961, 1726, 1694, 1453, 1250, 1172  $\text{cm}^{-1}$ ;  $^1\text{H}$  NMR (400.13 MHz) ( $\text{CDCl}_3$ ):  $\delta$  = 7.49-7.44 (m, 1H), 7.38-7.34 (m, 1H), 7.24-7.15 (m, 2H), 6.40 (d,  $J$  = 0.8 Hz, 1H), 3.36 (s, 2H), 2.77-2.56 (m, 4H), 2.02-1.90 (m, 1H), 1.89-1.77 (m, 1H), 1.40 (s, 3H);  $^{13}\text{C}$  NMR (100.6 MHz) ( $\text{CDCl}_3$ ):  $\delta$  = 210.0 (q), 154.4 (q), 154.3 (q), 128.5 (q), 123.6 (CH), 122.7 (CH), 120.6 (CH), 110.8 (CH), 104.6 (CH), 63.3 (q), 38.3 ( $\text{CH}_2$ ), 34.9 ( $\text{CH}_2$ ), 23.1 ( $\text{CH}_3$ ), 17.2 ( $\text{CH}_2$ ); HRMS:  $m/z$  [ $\text{M} + \text{Na}$ ] $^+$  calcd for  $\text{C}_{16}\text{H}_{16}\text{O}_3\text{Na}$ : 279.0992; found: 279.0992.

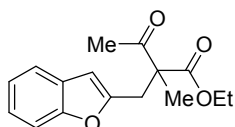

**13ab**: pale yellow oil; 86% yield (94.4 mg); IR (neat): 2983, 2928, 1712, 1454, 1356, 1250, 1018  $\text{cm}^{-1}$ ;  $^1\text{H}$  NMR (400.13 MHz) ( $\text{CDCl}_3$ ):  $\delta$  = 7.52-7.47 (m, 1H), 7.42-7.36 (m, 1H), 7.27-7.16 (m, 2H), 6.47 (d,  $J$  = 0.7 Hz, 1H), 4.26 (dq,  $J_1$  = 7.2 Hz,  $J_2$  = 1.3 Hz, 2H), 3.43 (d,  $J$  = 15.2 Hz, 1H), 3.31 (d,  $J$  = 15.2 Hz, 1H), 2.25 (s, 3H), 1.42 (s, 3H), 1.29 (t,  $J$  = 7.12 Hz, 3H);  $^{13}\text{C}$  NMR (100.6 MHz) ( $\text{CDCl}_3$ ):  $\delta$  = 204.4 (q), 172.0 (q), 154.8 (q), 154.2 (q), 128.5 (q), 123.7 (CH), 122.6 (CH), 120.5 (CH), 110.9 (CH), 105.4 (CH), 61.8 ( $\text{CH}_2$ ), 59.6 (q), 33.7 ( $\text{CH}_2$ ), 26.1 ( $\text{CH}_3$ ), 19.2 ( $\text{CH}_3$ ), 14.0 ( $\text{CH}_3$ ); HRMS:  $m/z$  [ $\text{M} + \text{Na}$ ] $^+$  calcd for  $\text{C}_{16}\text{H}_{18}\text{O}_4\text{Na}$ : 297.1097; found: 297.1094.

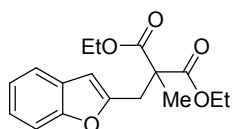

**13ac**: pale yellow oil; 70% yield (85.2 mg); IR (neat): 2982, 2939, 1730, 1454, 1238, 1174, 1106, 1019  $\text{cm}^{-1}$ ;  $^1\text{H}$  NMR (400.13 MHz) ( $\text{CDCl}_3$ ):  $\delta$  = 7.52-7.48 (m, 1H), 7.42-7.37 (m, 1H), 7.27-7.16 (m, 2H), 6.49 (s,  $J$  = 0.5 Hz, 1H), 4.26 (dq,  $J_1$  = 7.1 Hz,  $J_2$  = 1.8 Hz, 4H), 3.43 (s, 2H), 1.48 (s, 3H), 1.29 (t,  $J$  = 7.1 Hz, 6H);  $^{13}\text{C}$  NMR (100.6 MHz) ( $\text{CDCl}_3$ ):  $\delta$  = 171.4 (q), 154.8 (q), 154.1 (q), 128.5 (q), 123.7 (CH), 122.6 (CH), 120.5 (CH), 110.9 (CH), 105.3 (CH), 61.6 ( $\text{CH}_2$ ), 53.7 (q), 34.5 ( $\text{CH}_2$ ), 19.9 ( $\text{CH}_3$ ), 14.0 ( $\text{CH}_3$ ); HRMS:  $m/z$  [ $\text{M} + \text{Na}$ ] $^+$  calcd for  $\text{C}_{17}\text{H}_{20}\text{O}_5\text{Na}$ : 327.1203; found: 327.1202.



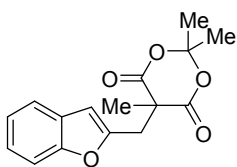

**13ad:** pale yellow oil; 97% yield (111.9 mg); IR (neat): 2923, 1776, 1737, 1453, 1380, 1251, 1055  $\text{cm}^{-1}$ ;  $^1\text{H}$  NMR (400.13 MHz) ( $\text{CDCl}_3$ ):  $\delta$  = 7.52-7.47 (m, 1H), 7.44-7.40 (m, 1H), 7.25 (td,  $J_1 = 7.2$ ,  $J_2 = 1.4$ , 1H), 7.25 (td,  $J_1 = 7.2$  Hz,  $J_2 = 1.4$  Hz, 1H), 6.55 (s, 1H), 3.56 (s, 2H), 1.80 (s, 3H), 1.71 (s, 3H), 1.28 (s, 3H);  $^{13}\text{C}$  NMR (100.6 MHz) ( $\text{CDCl}_3$ ):  $\delta$  = 169.3 (q), 154.7 (q), 152.2 (q), 128.1 (q), 124.3 (CH), 122.9 (CH), 120.9 (CH), 111.1 (CH), 106.0 (CH), 105.5 (q), 49.6 (q), 37.8 ( $\text{CH}_2$ ), 29.3 ( $\text{CH}_3$ ), 28.4 ( $\text{CH}_3$ ), 25.7 ( $\text{CH}_3$ ); HRMS:  $m/z$  [ $\text{M} + \text{Na}$ ] $^+$  calcd for  $\text{C}_{16}\text{H}_{16}\text{O}_5\text{Na}$ : 311.0890; found: 311.0890.

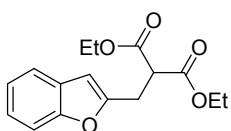

**13ae:** pale yellow oil; 57% yield (70 mg, on 0.42 mmol scale); IR (neat): 2982, 1730, 1454, 1251, 1147, 1031  $\text{cm}^{-1}$ ;  $^1\text{H}$  NMR (400.13 MHz) ( $\text{CDCl}_3$ ):  $\delta$  = 7.50 (d,  $J = 7.2$  Hz, 1H), 7.42 (d,  $J = 7.5$  Hz, 1H), 7.27-7.17 (m, 2H), 6.50 (s, 1H), 4.30-4.16 (m, 4H), 3.87 (t,  $J = 7.3$  Hz, 1H), 3.4 (d,  $J = 7.6$  Hz, 2H), 1.27 (t,  $J = 7.1$  Hz, 6H);  $^{13}\text{C}$  NMR (100.6 MHz) ( $\text{CDCl}_3$ ):  $\delta$  = 168.4 (q), 161.4 (q), 154.8 (q), 128.6 (q), 123.7 (CH), 122.6 (CH), 120.5 (CH), 110.9 (CH), 103.8 (CH), 61.8 ( $\text{CH}_2$ ), 50.7 (CH), 27.8 ( $\text{CH}_2$ ), 14.0 ( $\text{CH}_3$ ); HRMS:  $m/z$  [ $\text{M} + \text{Na}$ ] $^+$  calcd for  $\text{C}_{16}\text{H}_{18}\text{O}_5\text{Na}$ : 313.1046; found: 313.1046.

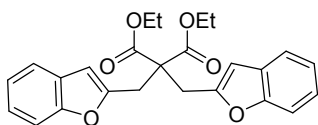

**13'ae:** pale yellow oil; 15% yield (15.0 mg, on 0.42 mmol scale); IR (neat): 2981, 1732, 1454, 1252, 1170, 1041  $\text{cm}^{-1}$ ;  $^1\text{H}$  NMR (400.13 MHz) ( $\text{CDCl}_3$ ):  $\delta$  = 7.54 (d,  $J = 7.3$  Hz, 2H), 7.43 (d,  $J = 7.9$  Hz, 2H), 7.28-7.20 (m, 4H), 6.60 (s, 2H), 4.30 (q,  $J = 7.3$  Hz, 4H), 3.49 (s, 4H), 1.31 (t,  $J = 7.3$  Hz, 8H);  $^{13}\text{C}$  NMR (100.6 MHz) ( $\text{CDCl}_3$ ):  $\delta$  = 169.8 (q), 153.7 (q), 128.4 (q), 123.8 (CH), 122.7 (CH), 120.6 (CH), 120.5 (q), 110.9 (CH), 106.0 (CH), 62.0 ( $\text{CH}_2$ ), 57.1 (q), 31.5 ( $\text{CH}_2$ ), 14.0 ( $\text{CH}_3$ ); HRMS:  $m/z$  [ $\text{M} + \text{Na}$ ] $^+$  calcd for  $\text{C}_{25}\text{H}_{24}\text{O}_6\text{Na}$ : 443.1465; found: 443.1462.

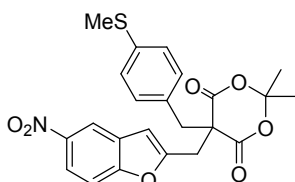

**13bf:** pale yellow solid; 98% yield (178.5 mg); mp: 150-151 $^{\circ}\text{C}$ ; IR (neat): 1962, 1740, 1521, 1440, 1341, 1259, 1085, 1014  $\text{cm}^{-1}$ ;  $^1\text{H}$  NMR (400.13 MHz) ( $\text{CDCl}_3$ ):  $\delta$  = 8.46 (d,  $J = 2.3$  Hz, 1H), 8.21 (dd,  $J_1 = 9.1$ , Hz,  $J_2 = 2.3$  Hz, 1H), 7.53 (d,  $J = 9.1$  Hz, 1H), 7.21 (d,  $J = 8.4$  Hz, 2H), 7.15 (d,  $J = 8.4$  Hz, 2H), 6.77 (s, 1H), 3.69 (s, 2H), 3.45 (s, 2H), 2.45 (s, 3H), 1.00 (s, 3H), 0.76 (s, 3H);  $^{13}\text{C}$  NMR (100.6 MHz) ( $\text{CDCl}_3$ ):  $\delta$  = 167.5 (q), 157.4 (q), 155.6 (q), 144.4 (q), 139.0 (q), 130.64 (CH), 130.61 (q), 128.4 (q), 126.8 (CH), 120.5 (CH), 117.6 (CH), 11.53 (CH), 107.3

(CH), 106.3 (q), 56.9 (q), 44.5 (CH<sub>2</sub>), 37.8 (CH<sub>2</sub>), 29.0 (CH<sub>3</sub>), 28.6 (CH<sub>3</sub>), 15.7 (CH<sub>3</sub>); HRMS:  $m/z$  [M + Na]<sup>+</sup> calcd for C<sub>23</sub>H<sub>21</sub>NO<sub>7</sub>SNa: 478.0931; found: 478.0933.

## REFERENCES

---

<sup>1</sup> Mukhanova, T. I.; Kukushkin, S. Y.; Ivanov, P. Y.; Alekseeva, L. M.; Granik, V. G. Russ. Chem. Bull. 2007, 56, 325-329.
